# Supplementary material for: Mineralogical and geochemical variation in stream sediments impacted by acid mine drainage is related to hydro-geomorphic setting
Source: Oxford University Press journal article supplement (doi:10.1525/elementa.286), 2018-01-01
Supplement: elementa-6-286-s1.xlsx [file elementa-6-286-s1.xlsx]

## Sheet: soil core XRD patterns
Supplementary data for Singer et al. "Mineralogical and geochemical variation in stream sediments impacted by acid mine drainage is related to hydro-geomorphic setting"
background-subtraced, normalized XRD patterns for sediments cores collected in 1 cm intervals
	ABOVE DAM																BELOW DAM															POOL 1
2q	1 cm	2 cm	3 cm	4 cm	5 cm	6 cm	7 cm	8 cm	9 cm	10 cm	11 cm	12 cm	13 cm	14 cm	15 cm	16 cm	1 cm	2 cm	3 cm	4 cm	5 cm	6 cm	7 cm	8 cm	9 cm	10 cm	11 cm	12 cm	13 cm	14 cm	15 cm	1 cm	3 cm	4 cm	5 cm	7 cm	8 cm	9 cm	11 cm	12 cm	13 cm	14 cm	15 cm	16 cm	17 cm	18 cm	19 cm	20 cm	21 cm
3	5.7393	4.87994	5.72495	5.37164	5.01055	6.08696	6.51769	10.1423	8.81057	8.02181	9.72763	9.25197	6.14035	9.19244	10.1351	14.3519	7.16925	7.49129	5.94406	5.10949	5.24131	7.6762	6.64384	5.58974	5.91814	6.59411	6.19469	4.74414	7.87106	5.99278	12.6725	10.249	12.1532	13.4108	9.50855	9.1922	21.6471	100	79.798	87.963	89.5833	98.0769	79.2453	81.6327	100	69.7248	83.4951	86	96.8421
3.02	4.86381	3.48567	5.35159	5.87133	5.27426	7.98419	5.21415	8.8968	7.57709	8.02181	9.24125	10.0394	6.07769	7.73196	10.2477	14.3519	7.5388	6.44599	5.24476	6.00786	4.20343	6.48988	6.84932	4.46154	4.59071	6.14597	6.71091	3.94456	7.64618	7.50903	11.5433	13.3142	12.0211	9.92608	12.0726	9.7493	19.7647	88.8889	83.8384	98.1481	89.5833	96.1538	100	91.8367	74.0385	77.0642	83.4951	89	91.5789
3.04	5.30156	3.9117	4.72931	5.87133	5.74895	7.19368	6.08318	9.78648	8.45815	8.56698	9.8249	11.0236	5.6391	9.45017	9.57207	14.1975	6.72579	8.79791	5.47786	5.16564	6.1754	5.86183	7.19178	4.10256	4.48009	5.6338	6.78466	4.42431	8.69565	6.06498	9.53576	9.38697	12.8137	8.97571	11.2179	10.1207	17.8824	88.8889	95.9596	100	91.6667	100	69.8113	74.4898	83.6538	80.7339	72.8155	90	100
3.06	5.54475	3.98916	4.91599	5.18426	5.06329	7.58893	6.0211	6.9395	9.86784	9.34579	8.46304	9.25197	5.13784	10.3093	8.78378	15.7407	7.16925	8.53659	5.47786	4.60415	5.13752	5.72226	8.42466	4.05128	4.42478	6.97823	7.07965	4.42431	7.42129	7.87004	11.0414	9.29119	11.4927	11.1932	9.72222	8.54225	23.2941	88.8889	96.9697	88.8889	95.8333	73.0769	78.3019	80.6122	88.4615	74.3119	88.3495	100	69.4737
3.08	5.20428	3.44694	6.34723	6.37102	5.43249	7.50988	4.77964	8.98577	8.10573	8.4891	9.4358	10.0394	5.95238	8.24742	11.3739	14.5062	7.31707	9.58188	5.24476	4.32341	4.56668	7.46685	7.67123	5.48718	3.9823	7.04225	6.78466	4.69083	6.5967	5.99278	11.4178	8.42912	10.0396	10.3485	9.0812	7.33519	23.5294	91.9192	86.8687	77.7778	96.875	96.1538	93.3962	94.898	75.9615	80.7339	73.7864	87	71.5789
3.1	4.57198	3.25329	5.35159	5.80887	4.48312	7.03557	5.46245	7.82918	8.19383	7.86604	10.7004	12.0079	5.2005	9.02062	9.68468	12.8086	6.06061	7.5784	4.60373	4.6603	4.92994	5.79204	7.05479	4.35897	3.65044	5.3137	7.0059	5.17058	8.62069	6.06498	10.7905	9.09962	12.8137	10.6653	11.6453	8.6351	19.7647	85.8586	100	84.2593	93.75	91.3462	73.5849	77.551	63.4615	88.0734	79.6117	92	69.4737
3.12	4.7179	3.21456	5.84941	5.30918	4.11392	7.66798	6.14525	7.02847	9.2511	7.39875	9.14397	10.1378	6.57895	8.50515	9.57207	13.5802	6.87361	7.75261	5.88578	4.43571	4.82615	5.65248	6.84932	4.46154	4.14823	6.65813	6.19469	5.27719	7.49625	6.6426	11.7942	8.42912	11.0964	9.2925	10.2564	6.40669	19.5294	98.9899	66.6667	71.2963	85.4167	76.9231	89.6226	90.8163	86.5385	73.3945	72.8155	74	77.8947
3.14	5.107	3.5244	4.79154	4.74703	5.06329	7.50988	6.08318	7.65125	7.22467	7.6324	10.0195	9.94094	5.26316	6.52921	9.7973	13.4259	6.7997	6.70732	5.65268	4.04267	4.411	7.11793	7.26027	4.15385	4.86726	4.86556	6.56342	3.62473	7.94603	7.87004	13.0489	9.38697	11.889	9.60929	12.3932	6.77809	23.2941	74.7475	76.7677	89.8148	88.5417	91.3462	84.9057	77.551	84.6154	82.5688	69.9029	80	87.3684
3.16	5.59339	3.36948	4.91599	5.49656	4.74684	9.24901	5.58659	8.27402	8.28194	7.55452	8.94942	8.46457	5.88972	7.30241	10.3604	14.9691	6.06061	7.83972	5.59441	3.59349	5.39699	5.93161	7.73973	5.02564	5.30973	5.24968	7.30088	4.58422	6.74663	5.34296	11.5433	6.70498	9.11493	10.5597	9.50855	8.72795	21.4118	85.8586	86.8687	82.4074	100	82.6923	82.0755	75.5102	73.0769	87.156	100	84	90.5263
3.18	4.57198	4.06662	4.23149	6.30856	5.48523	6.71937	5.15208	8.62989	8.98678	7.94393	7.7821	8.75984	5.6391	8.33333	10.8108	15.8951	5.91279	7.14286	5.65268	3.53734	3.89206	4.74529	6.09589	4.71795	4.25885	6.65813	5.97345	5.3838	6.5967	6.787	10.4141	8.23755	14.3989	8.97571	10.5769	7.24234	25.4118	90.9091	87.8788	74.0741	72.9167	78.8462	87.7358	80.6122	96.1538	93.578	86.4078	86	82.1053
3.2	4.28016	3.02091	4.29371	5.80887	4.90506	7.82609	5.40037	9.34164	7.40088	8.02181	8.46304	7.87402	4.94987	7.73196	9.34685	14.0432	6.57797	6.5331	5.71096	5.39023	5.44888	5.02442	7.32877	3.53846	4.86726	6.08195	5.75221	4.58422	6.22189	7.14801	8.53199	8.33333	9.37913	10.3485	11.1111	8.54225	16.4706	92.9293	84.8485	83.3333	96.875	79.8077	75.4717	84.6939	96.1538	83.4862	76.699	73	96.8421
3.22	5.107	3.44694	5.04045	4.87196	5.11603	6.95652	5.83489	9.25267	8.45815	6.61994	8.46304	9.64567	5.2005	8.0756	7.77027	13.5802	6.20843	7.22997	6.29371	4.21112	4.56668	5.79204	6.23288	4.05128	3.26327	6.14597	6.56342	4.47761	5.84708	5.92058	12.5471	9.57854	10.568	10.8765	11.7521	8.07799	18.5882	81.8182	75.7576	74.0741	90.625	80.7692	74.5283	100	79.8077	79.8165	77.6699	79	81.0526
3.24	3.79377	3.44694	5.22713	4.99688	3.85021	7.11462	6.20732	8.00712	8.01762	6.7757	7.97665	8.75984	5.07519	9.27835	8.22072	14.3519	6.72579	7.5784	4.77855	5.05334	4.04774	5.86183	6.91781	4.35897	3.20796	4.54545	5.89971	5.3838	7.49625	5.27076	10.9159	10.9195	11.7569	10.2429	10.7906	6.77809	19.7647	77.7778	90.9091	69.4444	83.3333	72.1154	89.6226	88.7755	89.4231	84.4037	87.3786	87	82.1053
3.26	4.18288	2.78854	4.66708	4.87196	4.00844	5.5336	4.90379	9.34164	8.63436	7.24299	8.36576	10.9252	5.01253	8.67698	9.00901	10.4938	4.5085	8.01394	5.24476	4.60415	4.98184	5.23378	5.41096	3.84615	4.09292	5.88988	4.941	3.78465	8.09595	6.20939	10.7905	6.89655	11.0964	9.82049	9.18803	6.87094	23.0588	86.8687	78.7879	83.3333	100	81.7308	82.0755	65.3061	93.2692	71.5596	79.6117	74	85.2632
3.28	4.91245	3.40821	7.09396	4.74703	3.79747	6.48221	5.95903	7.65125	7.7533	8.09969	9.14397	9.54724	5.95238	7.04467	8.33333	15.8951	5.91279	5.92334	5.41958	3.59349	4.20343	6.69923	5.34247	4.10256	4.36947	5.56978	5.82596	5.06397	6.67166	5.92058	11.4178	8.5249	10.9643	9.92608	9.82906	7.42804	18.3529	66.6667	75.7576	83.3333	81.25	87.5	72.6415	85.7143	62.5	86.2385	88.3495	85	85.2632
3.3	3.50195	3.17583	5.28936	4.62211	4.06118	6.40316	5.95903	7.74021	7.92952	6.15265	8.17121	8.36614	4.82456	6.18557	10.6982	14.1975	5.46933	7.31707	4.72028	4.49186	3.78827	5.79204	5.9589	4.10256	4.36947	4.80154	6.41593	5.59701	6.44678	7.00361	9.03388	8.33333	11.4927	9.18691	8.97436	7.70659	18.1176	58.5859	84.8485	65.7407	76.0417	61.5385	86.7925	78.5714	94.2308	69.7248	90.2913	89	92.6316
3.32	5.44747	3.48567	4.16926	5.24672	5.43249	6.64032	4.96586	8.18505	9.163	7.47664	8.36576	7.57874	5.45113	7.47423	8.10811	12.6543	5.54324	7.83972	5.36131	4.8849	3.94395	6.0014	6.23288	4.30769	3.9823	6.01793	5.82596	3.83795	6.82159	5.92058	8.90841	7.56705	9.64333	10.2429	9.72222	8.8208	16.4706	83.8384	85.8586	73.1481	86.4583	89.4231	79.2453	85.7143	63.4615	70.6422	71.8447	75	81.0526
3.34	3.84241	3.09837	3.92035	4.68457	4.11392	6.00791	5.46245	8.00712	6.43172	6.69782	8.26848	9.44882	5.45113	7.81787	10.473	15.1235	5.09978	4.70383	4.4289	4.8849	5.13752	6.90858	6.78082	4.66667	4.86726	5.82586	6.78466	3.62473	7.1964	5.63177	10.5395	6.89655	9.51123	8.76452	9.18803	7.70659	18.3529	83.8384	75.7576	72.2222	83.3333	72.1154	76.4151	69.3878	69.2308	100	77.6699	79	77.8947
3.36	4.57198	2.67235	4.54263	5.05934	4.11392	6.16601	5.21415	9.1637	7.40088	6.54206	9.33852	7.67717	5.57644	9.10653	9.7973	13.7346	5.76497	7.83972	4.60373	4.7726	4.35911	6.0014	5.82192	4.20513	4.03761	5.18566	7.9646	4.26439	6.22189	5.41516	11.2923	9.96169	10.3038	9.5037	8.54701	8.2637	17.6471	74.7475	73.7374	80.5556	96.875	77.8846	73.5849	83.6735	88.4615	81.6514	61.165	72	71.5789
3.38	3.55058	3.60186	4.72931	4.87196	3.5865	5.5336	5.52452	8.54093	7.04846	7.32087	9.04669	7.67717	4.82456	9.53608	8.55856	12.8086	6.72579	6.35889	3.61305	3.59349	3.21744	5.23378	5.68493	4.10256	4.31416	4.9936	5.30973	4.05117	6.22189	5.77617	10.0376	8.71648	9.64333	8.34213	9.9359	7.05664	18.3529	79.798	79.798	73.1481	82.2917	62.5	68.8679	86.7347	83.6538	59.633	63.1068	84	72.6316
3.4	3.6965	3.40821	5.22713	4.99688	3.63924	6.87747	6.14525	6.58363	8.37004	6.93146	8.94942	9.05512	6.07769	7.98969	9.12162	11.2654	5.39542	7.92683	4.60373	4.21112	3.73638	3.97767	5.75342	4.41026	4.64602	6.01793	6.34218	4.3177	6.44678	7.00361	7.6537	9.77011	8.45443	8.44773	11.0043	7.05664	16.7059	89.899	69.697	87.963	69.7917	81.7308	69.8113	77.551	79.8077	73.3945	60.1942	73	73.6842
3.42	4.47471	3.64059	4.23149	4.49719	3.79747	6.32411	4.28305	7.82918	6.60793	5.919	10.8949	9.94094	5.57644	7.81787	8.55856	15.1235	5.2476	5.4878	5.18648	4.09882	2.95797	6.48988	6.71233	4.05128	3.65044	5.05762	5.75221	4.42431	5.92204	5.55957	10.4141	7.27969	8.19022	8.13094	9.50855	6.59239	18.5882	79.798	79.798	73.1481	88.5417	75	60.3774	79.5918	68.2692	77.9817	82.5243	83	75.7895
3.44	3.98833	3.75678	5.04045	4.55965	4.21941	6.64032	4.84171	8.27402	6.51982	5.37383	8.65759	8.46457	4.57393	8.0756	8.78378	11.2654	6.72579	6.09756	4.07925	4.43571	3.32122	5.02442	6.84932	3.28205	3.76106	4.28937	6.71091	3.94456	6.52174	4.47653	10.665	7.95019	10.0396	11.9324	12.3932	6.87094	16.7059	76.7677	85.8586	70.3704	78.125	75.9615	80.1887	78.5714	55.7692	60.5505	73.7864	69	83.1579
3.46	3.50195	2.866	4.97822	4.87196	4.11392	6.32411	4.34513	8.8968	8.01762	6.30841	7.58755	6.59449	5.45113	8.41924	7.77027	10.3395	5.46933	7.05575	4.662	3.64964	4.35911	4.88486	6.36986	3.58974	3.87168	5.3137	5.89971	4.21109	7.1964	5.70397	9.66123	7.85441	9.64333	7.81415	8.97436	8.6351	17.8824	61.6162	64.6465	76.8519	85.4167	73.0769	66.0377	71.4286	54.8077	66.9725	72.8155	88	77.8947
3.48	4.23152	2.43997	3.48475	5.1218	3.05907	6.16601	4.96586	8.54093	5.99119	5.919	7.49027	7.77559	5.01253	6.87285	6.75676	14.0432	5.02587	7.5784	5.06993	4.09882	3.5288	5.65248	6.23288	3.64103	3.53982	4.48143	5.82596	4.21109	5.24738	4.25993	9.15935	7.66284	9.51123	9.18691	8.11966	6.49954	19.7647	77.7778	72.7273	81.4815	51.0417	82.6923	70.7547	82.6531	83.6538	68.8073	74.7573	80	74.7368
3.5	4.57198	2.71108	6.09832	5.18426	3.90295	6.08696	5.89696	8.00712	7.40088	6.69782	8.85214	8.07087	4.32331	8.41924	8.33333	12.037	5.2476	7.40418	4.02098	3.53734	3.99585	5.16399	5.34247	3.64103	3.15265	4.28937	5.60472	3.3049	7.04648	6.42599	8.15558	10.5364	10.1717	8.44773	9.0812	5.57103	19.7647	68.6869	73.7374	68.5185	66.6667	55.7692	66.9811	89.7959	76.9231	65.1376	75.7282	64	82.1053
3.52	4.13424	2.67235	4.16926	4.80949	4.06118	7.27273	4.96586	7.74021	6.60793	8.80062	10.0195	8.75984	4.44862	7.04467	6.98198	11.7284	5.02587	6.18467	3.9627	4.54801	3.32122	5.65248	4.17808	3.64103	3.31858	4.35339	6.56342	4.05117	6.82159	4.90975	10.2886	7.85441	10.3038	7.70855	8.33333	7.33519	13.4118	66.6667	84.8485	64.8148	76.0417	76.9231	69.8113	75.5102	72.1154	63.3028	54.3689	66	78.9474
3.54	3.93969	3.48567	3.23584	4.43473	3.42827	7.11462	5.21415	7.11744	7.22467	6.7757	9.33852	6.98819	3.94737	6.61512	6.64414	11.7284	5.9867	6.18467	4.48718	3.59349	4.20343	5.79204	5.89041	3.69231	3.59513	4.60948	5.89971	3.67804	6.44678	5.63177	9.66123	8.62069	8.45443	12.038	8.33333	6.49954	14.1176	69.697	65.6566	85.1852	86.4583	68.2692	62.2642	83.6735	72.1154	66.055	77.6699	63	66.3158
3.56	4.03696	2.43997	3.73367	4.80949	5.01055	6.16601	4.59342	7.11744	6.51982	6.7757	8.46304	7.77559	4.69925	7.56014	9.45946	9.5679	6.28234	6.01045	3.67133	3.87423	3.32122	5.58269	6.16438	3.94872	4.31416	4.80154	5.75221	4.21109	7.1964	4.62094	9.15935	8.14176	11.889	8.65892	9.0812	6.77809	17.1765	76.7677	78.7879	61.1111	77.0833	68.2692	76.4151	68.3673	63.4615	69.7248	59.2233	61	64.2105
3.58	3.50195	2.98218	4.66708	4.55965	3.9557	7.35178	4.4072	8.45196	7.40088	6.30841	7.97665	6.88976	4.7619	6.52921	8.78378	12.1914	5.02587	7.5784	4.31235	3.76193	3.89206	5.93161	5.47945	4.10256	3.48451	4.41741	5.97345	3.57143	6.44678	5.27076	9.03388	7.18391	9.51123	8.23654	9.0812	5.84958	17.4118	63.6364	88.8889	63.8889	82.2917	52.8846	69.8113	66.3265	94.2308	63.3028	70.8738	71	85.2632
3.6	4.52335	2.74981	5.28936	4.68457	4.69409	5.77075	4.71757	8.45196	6.51982	6.7757	7.97665	8.85827	5.2005	7.30241	6.86937	11.5741	6.94752	6.79443	3.55478	3.87423	3.47691	5.37334	4.52055	3.74359	4.09292	4.09731	7.07965	4.90405	5.69715	6.20939	11.9197	7.18391	7.52972	9.82049	8.97436	6.68524	13.1765	75.7576	72.7273	84.2593	86.4583	58.6538	60.3774	62.2449	75.9615	70.6422	64.0777	72	69.4737
3.62	3.98833	2.63362	4.54263	3.87258	2.8481	4.98024	4.15891	6.13879	6.1674	5.60748	7.87938	8.07087	4.19799	7.13058	8.10811	14.0432	5.91279	6.18467	5.18648	4.49186	3.73638	4.2568	5.75342	3.28205	3.48451	4.80154	4.941	3.51812	5.997	6.5704	10.5395	9.00383	10.568	9.5037	7.69231	7.05664	14.8235	52.5253	80.8081	57.4074	67.7083	69.2308	75.4717	79.5918	57.6923	73.3945	75.7282	76	75.7895
3.64	3.21012	2.90473	5.47604	4.87196	4.06118	5.6917	4.59342	7.11744	5.55066	6.30841	6.90661	6.49606	4.57393	8.16151	8.22072	12.963	5.61715	7.49129	3.9627	4.54801	3.73638	4.88486	4.24658	3.89744	3.87168	4.80154	6.41593	3.41151	4.27286	4.98195	9.53576	6.22605	9.24703	8.34213	9.29487	7.42804	16	70.7071	70.7071	75.9259	66.6667	80.7692	66.9811	65.3061	79.8077	55.9633	82.5243	70	57.8947
3.66	3.40467	3.02091	4.35594	4.68457	4.21941	5.6917	5.3383	8.09609	7.7533	5.68536	6.71206	7.08661	5.01253	7.04467	6.98198	10.6481	4.5085	6.88153	4.31235	3.42504	3.5807	4.88486	6.0274	3.28205	4.20354	4.6735	5.75221	3.78465	6.14693	4.18773	11.4178	8.81226	9.51123	8.76452	7.69231	6.31383	15.0588	66.6667	70.7071	62.037	73.9583	76.9231	56.6038	67.3469	65.3846	62.3853	55.3398	62	70.5263
3.68	3.6965	2.28505	4.23149	4.62211	3.63924	6.08696	3.97269	7.29537	7.84141	6.30841	7.58755	8.75984	4.38596	5.84192	6.75676	13.1173	5.69106	6.01045	4.25408	3.31275	3.78827	5.23378	5.54795	3.79487	3.59513	5.50576	4.57227	3.94456	6.5967	5.41516	9.91217	6.70498	8.19022	7.81415	9.9359	7.24234	15.0588	74.7475	73.7374	62.037	71.875	57.6923	79.2453	62.2449	64.4231	66.055	66.0194	62	73.6842
3.7	4.13424	2.55616	4.72931	4.68457	3.37553	6.32411	5.02793	6.58363	6.1674	7.32087	7.10117	7.77559	4.32331	6.18557	7.88288	12.6543	4.95196	7.22997	4.4289	3.42504	2.49092	5.30356	5.20548	3.58974	2.76549	4.48143	4.71976	3.94456	5.84708	5.77617	10.4141	7.85441	9.11493	8.65892	6.94444	6.49954	14.5882	71.7172	78.7879	71.2963	63.5417	64.4231	55.6604	68.3673	69.2308	55.9633	63.1068	69	68.4211
3.72	3.6965	2.28505	4.29371	3.6852	2.95359	5.61265	4.96586	7.11744	6.0793	5.60748	7.19844	7.28346	4.63659	8.8488	7.54505	12.3457	4.65632	6.18467	3.78788	3.53734	3.5807	6.0014	5.54795	4	3.04204	4.60948	6.26844	3.94456	6.5967	4.83755	8.90841	5.84291	9.37913	6.86378	8.33333	6.96379	17.8824	62.6263	71.7172	77.7778	72.9167	58.6538	58.4906	61.2245	60.5769	76.1468	57.2816	80	61.0526
3.74	3.11284	3.17583	4.35594	4.05996	3.69198	4.50593	5.15208	9.25267	5.99119	6.38629	7.97665	5.01969	3.82206	6.01375	7.31982	10.9568	5.32151	6.09756	4.25408	3.76193	4.20343	4.11724	5.54795	4	3.92699	5.44174	4.49853	3.83795	5.77211	4.54874	6.02258	8.71648	10.568	8.13094	9.61538	5.94243	14.1176	62.6263	63.6364	62.037	82.2917	67.3077	59.434	66.3265	61.5385	58.7156	70.8738	54	54.7368
3.76	3.64786	2.13013	4.79154	4.49719	3.53376	6.71937	5.15208	6.22776	5.81498	5.84112	6.22568	7.77559	4.7619	7.47423	7.43243	10.6481	4.95196	4.87805	3.90443	3.08815	3.06175	4.11724	5.47945	3.28205	3.53982	4.54545	5.38348	4.05117	5.997	4.62094	9.03388	8.42912	7.92602	6.86378	7.79915	5.47818	14.5882	66.6667	67.6768	62.037	56.25	60.5769	63.2075	66.3265	62.5	61.4679	50.4854	58	48.4211
3.78	3.21012	2.98218	3.85812	3.9975	3.05907	4.26877	4.34513	6.85053	5.46256	5.60748	5.35019	7.08661	4.69925	6.87285	6.86937	13.2716	7.09534	6.70732	4.13753	3.70578	3.68448	4.53594	5.41096	2.82051	3.81637	4.16133	5.38348	3.67804	4.72264	4.47653	9.15935	7.37548	6.86922	8.97571	7.47863	5.47818	16	65.6566	65.6566	50.9259	69.7917	68.2692	50.9434	69.3878	70.1923	55.0459	69.9029	73	71.5789
3.8	3.6965	3.33075	4.91599	4.12242	3.79747	5.5336	5.02793	5.96085	6.1674	5.45171	7.58755	6.59449	4.51128	6.4433	8.33333	12.3457	4.21286	4.87805	3.43823	3.42504	3.63259	4.11724	4.45205	3.38462	3.48451	4.09731	6.12094	3.73134	5.32234	5.41516	8.03011	8.14176	8.45443	7.70855	7.47863	7.61374	19.0588	70.7071	70.7071	57.4074	75	51.9231	42.4528	62.2449	79.8077	49.5413	63.1068	77	67.3684
3.82	3.30739	2.4787	5.10268	4.37227	3.00633	5.77075	4.84171	7.65125	5.72687	5.99688	7.29572	7.38189	4.01003	6.35739	7.09459	10.3395	4.13895	6.01045	4.02098	3.1443	2.80228	4.88486	4.52055	2.87179	3.53982	4.48143	5.60472	3.09168	5.09745	4.54874	9.03388	6.99234	8.05812	6.75818	7.90598	7.52089	14.1176	75.7576	52.5253	64.8148	69.7917	62.5	84.9057	66.3265	76.9231	48.6239	56.3107	50	63.1579
3.84	2.96693	2.55616	4.0448	3.74766	3.11181	6.00791	3.72439	6.31673	5.46256	7.16511	6.80934	8.46457	4.32331	6.35739	7.31982	10.8025	4.95196	5.57491	3.2634	3.53734	3.68448	4.74529	5.75342	3.48718	3.15265	3.64917	5.67847	2.71855	5.84708	5.27076	9.41029	9.77011	9.24703	8.13094	8.11966	6.03528	17.4118	60.6061	63.6364	52.7778	79.1667	69.2308	61.3208	64.2857	62.5	50.4587	64.0777	53	68.4211
3.86	3.64786	2.94345	4.0448	3.62274	3.74473	5.21739	3.84854	6.9395	5.99119	4.6729	6.80934	6.98819	4.26065	4.98282	7.20721	8.95062	5.02587	5.74913	4.07925	4.43571	3.11365	4.74529	5.06849	3.23077	3.04204	3.96927	4.941	3.2516	4.1979	4.98195	6.52447	7.47126	8.71863	8.76452	7.15812	6.22098	11.2941	49.4949	60.6061	44.4444	80.2083	68.2692	64.1509	69.3878	74.0385	69.7248	60.1942	64	75.7895
3.88	4.0856	2.43997	3.73367	5.49656	3.32278	6.40316	3.97269	6.40569	6.51982	5.99688	6.90661	7.38189	4.13534	6.87285	7.88288	11.8827	5.46933	5.83624	3.08858	4.37956	3.06175	4.95464	4.93151	3.17949	3.59513	3.96927	4.12979	3.57143	4.7976	5.70397	8.53199	8.14176	8.58653	7.49736	8.11966	5.75673	16	77.7778	57.5758	62.037	85.4167	75.9615	59.434	56.1224	65.3846	77.0642	55.3398	55	53.6842
3.9	3.84241	2.13013	3.79589	3.6852	2.53165	5.8498	4.53135	6.40569	7.13656	5.45171	6.71206	6.10236	3.50877	6.52921	5.96847	11.4198	4.43459	5.83624	3.9627	3.36889	3.32122	4.18702	5.82192	3.48718	2.54425	4.16133	5.23599	3.62473	4.72264	5.63177	7.40276	6.03448	8.45443	6.44139	7.58547	4.92108	15.2941	59.596	57.5758	48.1481	57.2917	50	68.8679	54.0816	78.8462	59.633	54.3689	57	62.1053
3.92	2.91829	2.59489	3.73367	3.87258	2.26793	3.95257	3.72439	7.65125	6.25551	6.15265	7.10117	6.79134	3.94737	5.84192	7.77027	10.3395	4.65632	5.4007	3.9627	2.75126	3.11365	4.39637	4.86301	3.17949	3.20796	4.22535	3.53982	3.14499	5.02249	3.82671	7.6537	5.17241	8.32232	7.49736	9.50855	6.49954	18.5882	59.596	60.6061	52.7778	66.6667	50.9615	49.0566	58.1633	70.1923	74.3119	70.8738	58	65.2632
3.94	3.01556	1.97521	4.35594	3.93504	3.11181	6.32411	3.78647	6.40569	5.90308	5.68536	7.10117	7.08661	5.57644	7.04467	8.22072	10.8025	5.32151	4.96516	3.37995	3.20045	3.32122	4.46615	5.75342	3.12821	3.31858	4.09731	5.75221	3.03838	5.92204	5.99278	8.28105	7.95019	8.58653	8.23654	6.41026	6.22098	14.5882	57.5758	59.596	50.9259	66.6667	73.0769	53.7736	47.9592	52.8846	53.211	62.1359	58	57.8947
3.96	3.50195	2.51743	4.35594	3.37289	2.58439	6.64032	3.66232	6.85053	6.25551	5.21807	6.71206	6.20079	3.63409	5.75601	6.30631	10.4938	4.21286	4.87805	3.32168	2.91971	3.5807	4.04745	4.0411	3.28205	3.26327	4.28937	5.01475	3.3049	4.7976	5.05415	7.90464	6.89655	6.47292	7.49736	7.15812	6.31383	14.1176	52.5253	62.6263	57.4074	77.0833	52.8846	60.3774	55.102	63.4615	48.6239	71.8447	59	73.6842
3.98	3.01556	1.97521	3.17362	4.18488	2.79536	5.8498	4.46927	5.69395	5.63877	5.99688	6.42023	6.88976	4.38596	6.18557	7.9955	8.64198	4.80414	6.09756	4.13753	3.1443	2.6985	4.74529	4.72603	2.87179	3.81637	5.24968	4.57227	3.46482	5.92204	4.33213	8.65747	8.14176	7.66182	5.49102	6.30342	6.31383	17.4118	75.7576	43.4343	54.6296	62.5	47.1154	49.0566	52.0408	79.8077	46.789	63.1068	59	77.8947
4	3.35603	2.866	3.92035	4.43473	2.79536	5.6917	3.84854	6.58363	6.34361	5.45171	6.32296	6.98819	4.26065	6.09966	8.78378	9.25926	5.09978	5.13937	3.84615	3.42504	2.23145	3.76832	4.93151	2.87179	3.92699	4.6735	5.53097	3.67804	5.24738	4.76534	7.40276	7.47126	7.79392	6.75818	10.2564	5.66388	14.1176	64.6465	63.6364	64.8148	76.0417	53.8462	49.0566	62.2449	42.3077	44.9541	64.0777	58	54.7368
4.02	3.16148	2.36251	3.11139	3.43535	3.2173	4.18972	5.09001	5.60498	5.37445	5.37383	5.83658	5.51181	3.50877	5.84192	7.20721	8.7963	5.02587	5.4878	4.07925	3.2566	2.75039	4.04745	5.20548	2.51282	3.53982	4.92958	5.23599	3.2516	4.72264	3.3935	9.15935	6.99234	9.90753	6.54699	6.19658	5.01393	14.3529	66.6667	64.6465	54.6296	64.5833	67.3077	55.6604	69.3878	65.3846	60.5505	76.699	66	69.4737
4.04	3.59922	2.05267	3.54698	3.87258	3.27004	5.6917	3.53818	5.51601	5.72687	5.60748	5.7393	6.00394	4.01003	6.4433	7.77027	8.33333	4.06504	5.22648	2.73893	2.91971	3.68448	3.34962	4.24658	3.38462	3.09735	3.64917	4.64602	3.35821	4.64768	4.62094	9.91217	6.89655	6.86922	6.54699	8.76068	6.87094	15.7647	55.5556	57.5758	58.3333	62.5	53.8462	49.0566	57.1429	61.5385	55.9633	61.165	70	54.7368
4.06	3.45331	2.24632	3.79589	4.43473	4.11392	4.82213	4.15891	6.04982	5.02203	5.06231	5.35019	8.16929	4.26065	6.87285	5.74324	9.41358	3.91722	5.57491	4.72028	2.41437	3.00986	4.60572	4.93151	2.92308	3.53982	3.96927	4.79351	2.87846	4.49775	5.12635	7.40276	8.14176	7.39762	8.34213	6.83761	7.33519	11.0588	58.5859	78.7879	54.6296	57.2917	55.7692	53.7736	75.5102	75.9615	64.2202	57.2816	58	60
4.08	2.62646	2.43997	4.23149	4.12242	3.2173	5.5336	3.66232	4.7153	6.0793	4.51713	6.22568	6.98819	4.44862	6.01375	8.55856	13.4259	4.58241	5.4007	3.43823	2.86356	3.16554	5.09421	4.31507	3.48718	2.93142	3.71319	5.01475	3.57143	4.64768	5.12635	7.15182	6.89655	6.60502	7.70855	8.76068	7.61374	16.7059	64.6465	61.6162	50	52.0833	62.5	73.5849	56.1224	60.5769	53.211	52.4272	67	65.2632
4.1	3.59922	2.16886	2.48911	2.99813	3.63924	4.03162	4.22098	6.04982	4.84581	3.89408	7.49027	6.29921	4.88722	5.32646	6.75676	8.7963	3.69549	4.79094	4.02098	3.2566	3.42501	3.48918	5	3.07692	3.70575	4.03329	3.83481	3.3049	5.54723	5.27076	7.90464	8.33333	7.52972	8.13094	6.41026	6.87094	15.7647	58.5859	49.4949	52.7778	67.7083	47.1154	43.3962	76.5306	58.6538	60.5505	57.2816	56	49.4737
4.12	3.64786	2.32378	3.48475	3.81012	3.2173	4.98024	3.72439	6.04982	5.28634	4.04984	5.15564	6.49606	5.32581	5.58419	5.96847	9.41358	4.21286	6.18467	4.07925	3.31275	3.11365	4.67551	4.58904	3.28205	3.15265	4.35339	4.79351	3.51812	4.72264	4.83755	7.52823	6.6092	6.86922	6.44139	8.01282	6.03528	14.5882	49.4949	58.5859	57.4074	73.9583	48.0769	58.4906	63.2653	47.1154	63.3028	66.9903	60	54.7368
4.14	3.01556	2.13013	3.3603	3.31043	2.63713	4.58498	4.03476	6.31673	6.0793	4.90654	5.54475	5.90551	3.63409	5.58419	6.64414	7.09877	4.5085	6.01045	4.07925	3.59349	2.6985	4.53594	3.90411	3.02564	3.37389	3.90525	5.23599	3.78465	4.57271	4.11552	8.53199	5.45977	5.54822	7.18057	7.15812	5.84958	14.8235	60.6061	61.6162	51.8519	45.8333	55.7692	54.717	67.3469	50.9615	55.0459	60.1942	61	61.0526
4.16	4.37743	2.55616	2.98693	4.55965	3.27004	6.08696	5.15208	5.60498	5.81498	4.20561	6.22568	8.66142	5.01253	5.58419	6.08108	8.7963	4.06504	5.31359	3.9627	3.76193	2.6466	3.90789	5.13699	3.17949	2.98673	2.94494	5.23599	2.55864	5.32234	4.40433	8.40652	7.08812	8.32232	6.1246	6.62393	5.38533	16.4706	52.5253	56.5657	62.037	65.625	62.5	50.9434	62.2449	60.5769	47.7064	73.7864	55	54.7368
4.18	3.93969	1.82029	3.29807	4.62211	3.48101	5.37549	3.66232	3.64769	5.63877	6.07477	7.00389	6.49606	4.13534	5.58419	5.63063	7.71605	4.28677	5.31359	3.90443	2.75126	3.68448	4.95464	4.58904	3.33333	3.04204	4.35339	4.86726	2.66525	5.54723	3.3213	5.5207	6.03448	6.60502	8.02534	6.51709	6.49954	13.6471	52.5253	59.596	52.7778	52.0833	51.9231	49.0566	47.9592	64.4231	60.5505	55.3398	67	49.4737
4.2	3.50195	2.20759	3.60921	3.56027	3.27004	4.18972	4.46927	6.13879	5.28634	5.60748	6.61479	6.88976	4.19799	5.06873	6.53153	9.87654	5.02587	6.70732	3.20513	2.91971	2.85418	4.04745	5.41096	3.12821	3.04204	3.77721	3.9823	3.19829	3.07346	4.33213	7.6537	7.56705	7.66182	6.96938	7.15812	5.47818	14.1176	66.6667	55.5556	54.6296	58.3333	47.1154	50	60.2041	52.8846	49.5413	52.4272	49	54.7368
4.22	2.62646	2.20759	3.85812	4.05996	2.90084	3.32016	3.53818	6.58363	4.5815	6.15265	6.51751	4.72441	4.19799	5.32646	7.20721	7.56173	4.21286	4.61672	2.73893	2.75126	3.06175	5.37334	4.86301	3.12821	3.20796	3.90525	4.49853	2.93177	5.54723	3.75451	6.64994	5.84291	8.58653	6.1246	6.62393	6.31383	15.0588	55.5556	65.6566	48.1481	57.2917	57.6923	41.5094	51.0204	46.1538	53.211	55.3398	56	63.1579
4.24	3.35603	2.71108	3.98258	3.24797	3.48101	4.98024	3.91061	5.42705	6.0793	5.14019	6.1284	8.26772	3.3208	5.32646	4.72973	8.48765	4.28677	5.13937	4.37063	3.48119	3.37312	3.62875	4.31507	3.28205	3.87168	4.03329	4.79351	2.77186	5.17241	4.11552	7.15182	6.70498	6.60502	6.2302	6.51709	5.84958	15.2941	54.5455	54.5455	51.8519	69.7917	57.6923	48.1132	56.1224	49.0385	48.6239	46.6019	47	46.3158
4.26	3.35603	2.36251	3.42253	3.24797	3.05907	5.61265	3.10366	5.78292	4.75771	4.82866	6.42023	5.90551	3.07018	4.0378	5.63063	7.87037	5.09978	5.92334	3.2634	3.20045	3.26933	3.90789	5.54795	3.23077	2.32301	3.84123	5.75221	2.34542	5.09745	4.98195	8.40652	6.22605	6.47292	6.54699	8.11966	6.59239	13.8824	65.6566	49.4949	37.963	44.7917	61.5385	47.1698	58.1633	51.9231	54.1284	60.1942	56	47.3684
4.28	2.62646	2.866	4.35594	3.81012	2.95359	4.03162	3.66232	4.89324	5.72687	4.28349	5.64202	5.80709	2.94486	5.75601	6.30631	8.64198	4.06504	4.61672	3.90443	3.31275	3.16554	3.76832	4.93151	3.02564	2.98673	3.90525	4.49853	3.35821	4.42279	3.75451	6.77541	6.70498	6.73712	6.01901	5.55556	5.66388	12.2353	54.5455	63.6364	53.7037	60.4167	50	58.4906	51.0204	55.7692	57.7982	55.3398	51	62.1053
4.3	2.72374	2.16886	3.48475	3.87258	3.05907	3.39921	3.84854	4.80427	5.55066	4.82866	5.35019	5.90551	2.94486	5.06873	5.74324	9.87654	4.06504	5.22648	3.37995	2.97586	2.75039	3.97767	3.9726	3.4359	3.70575	3.07298	4.49853	2.61194	4.12294	3.68231	5.77164	6.51341	8.05812	4.96304	7.15812	5.47818	11.0588	58.5859	52.5253	50	60.4167	56.7308	47.1698	51.0204	58.6538	56.8807	55.3398	47	52.6316
4.32	2.96693	2.28505	4.0448	3.06059	2.32068	4.50593	4.34513	6.9395	5.81498	4.43925	5.54475	5.21654	3.50877	5.6701	4.61712	6.79012	3.7694	5.22648	4.37063	2.86356	2.49092	3.97767	4.58904	3.69231	2.48894	3.39309	4.35103	2.82516	4.87256	3.97112	7.40276	7.18391	6.20872	7.28617	5.98291	4.17827	13.8824	62.6263	60.6061	44.4444	50	64.4231	54.717	45.9184	61.5385	44.0367	52.4272	47	54.7368
4.34	2.86965	1.89775	2.98693	4.43473	3.11181	4.34783	4.22098	5.87189	4.93392	5.06231	7.29572	6.98819	2.75689	4.0378	6.98198	10.8025	4.13895	5.57491	3.4965	3.08815	3.00986	3.8381	5.41096	3.23077	2.76549	3.07298	4.20354	3.62473	4.57271	4.40433	8.90841	6.32184	6.34082	7.28617	6.30342	6.59239	12.7059	70.7071	55.5556	55.5556	56.25	49.0385	63.2075	50	47.1154	55.0459	48.5437	57	49.4737
4.36	2.77237	2.05267	3.73367	3.87258	2.8481	4.58498	3.91061	6.22776	4.31718	4.36137	5.7393	6.10236	3.44612	4.98282	4.72973	9.41358	3.99113	5.22648	2.85548	2.52667	2.80228	2.582	5.06849	3.07692	3.4292	2.94494	4.20354	3.03838	4.12294	4.33213	6.399	6.99234	6.34082	5.91341	6.94444	5.01393	14.3529	69.697	63.6364	51.8519	51.0417	59.6154	48.1132	48.9796	50.9615	47.7064	66.9903	60	64.2105
4.38	2.82101	2.20759	2.98693	3.06059	3.27004	4.11067	3.4761	5.42705	4.40529	4.90654	5.25292	6.10236	4.01003	3.95189	5.74324	7.87037	4.13895	5.4878	2.73893	2.41437	2.43902	3.07048	5.20548	2.25641	2.8208	4.09731	4.35103	2.45203	5.62219	3.75451	6.52447	6.51341	7.66182	4.85744	6.62393	4.73538	16	58.5859	56.5657	58.3333	66.6667	62.5	47.1698	67.3469	48.0769	52.2936	64.0777	66	46.3158
4.4	2.82101	1.97521	4.10703	3.37289	2.53165	4.74308	3.16574	5.51601	6.25551	4.36137	5.83658	5.51181	3.13283	4.55326	5.96847	10.6481	4.5085	4.3554	3.61305	2.52667	2.59471	4.04745	4.17808	2.15385	2.93142	3.71319	3.24484	2.1855	4.27286	3.97112	7.52823	7.18391	6.47292	5.80781	7.47863	4.36397	12	41.4141	47.4747	49.0741	55.2083	46.1538	47.1698	62.2449	48.0769	47.7064	42.7184	58	50.5263
4.42	3.50195	2.16886	3.79589	3.93504	2.90084	4.34783	4.28305	5.24911	5.72687	4.6729	5.25292	6.10236	3.69674	5.24055	6.98198	10.9568	4.5085	4.70383	3.2634	2.80741	2.54281	3.8381	3.9726	2.82051	2.93142	3.32907	4.20354	3.46482	5.09745	4.11552	7.02635	5.9387	5.15192	4.75185	6.08974	4.27112	9.88235	60.6061	44.4444	62.963	53.125	58.6538	54.717	56.1224	52.8846	39.4495	48.5437	58	56.8421
4.44	2.6751	1.89775	3.60921	3.81012	3.32278	4.50593	3.91061	6.49466	4.75771	5.37383	4.86381	6.20079	3.00752	5.49828	5.74324	9.41358	3.99113	4.44251	2.97203	2.86356	2.38713	4.46615	4.38356	3.07692	2.76549	3.84123	4.57227	3.14499	4.04798	3.1769	7.40276	5.65134	5.68032	5.91341	7.69231	5.38533	12.7059	45.4545	58.5859	50.9259	61.4583	43.2692	34.9057	45.9184	51.9231	55.9633	66.0194	50	52.6316
4.46	2.6751	2.0914	3.29807	2.93567	2.53165	4.58498	3.41403	4.62633	4.93392	4.82866	5.64202	6.79134	3.7594	5.49828	6.30631	7.87037	3.69549	4.70383	3.55478	2.69512	3.5807	4.11724	4.31507	2.71795	2.87611	3.96927	3.9823	3.03838	4.64768	4.11552	6.27353	6.22605	9.24703	5.70222	7.37179	6.12813	15.7647	57.5758	50.5051	39.8148	60.4167	61.5385	44.3396	50	54.8077	42.2018	61.165	40	51.5789
4.48	2.33463	1.82029	3.11139	3.56027	2.90084	4.18972	4.4072	6.6726	6.0793	5.06231	6.1284	7.57874	3.07018	4.89691	5.63063	8.95062	3.62158	5.05226	3.37995	2.41437	2.6985	4.88486	4.58904	2.76923	2.48894	3.52113	3.76106	3.51812	4.64768	4.54874	7.15182	7.37548	7.39762	4.54065	5.98291	5.10678	12.4706	54.5455	51.5152	49.0741	50	41.3462	56.6038	62.2449	49.0385	51.3761	56.3107	61	44.2105
4.5	3.35603	1.89775	3.11139	3.6852	2.4789	2.45059	2.7933	5.69395	6.25551	4.75078	4.37743	5.41339	5.26316	3.95189	5.29279	8.7963	3.32594	4.18118	3.61305	3.42504	2.75039	4.95464	3.63014	2.92308	2.48894	3.71319	4.35103	3.14499	4.27286	4.47653	6.52447	5.17241	7.13342	5.49102	6.51709	6.40669	13.8824	43.4343	53.5354	49.0741	60.4167	50	50.9434	54.0816	56.7308	48.6239	48.5437	41	53.6842
4.52	2.62646	2.01394	2.9247	3.6852	2.74262	4.26877	3.35196	5.33808	5.19824	4.43925	6.1284	5.61024	2.81955	6.27148	5.74324	8.02469	3.17812	3.3101	3.0303	2.80741	2.90607	3.34962	4.24658	2.76923	2.65487	3.77721	4.86726	2.39872	3.97301	3.3213	5.26976	4.78927	5.94452	6.2302	4.38034	4.92108	13.1765	69.697	53.5354	40.7407	72.9167	50.9615	58.4906	53.0612	50	35.7798	56.3107	52	46.3158
4.54	3.25875	1.74284	3.17362	3.6852	2.21519	4.82213	3.41403	4.18149	5.19824	4.20561	5.93385	4.82283	3.94737	6.35739	5.96847	10.1852	4.80414	4.87805	3.14685	2.24593	2.43902	3.8381	3.63014	2.87179	3.65044	3.64917	3.83481	2.61194	4.57271	4.11552	6.64994	5.2682	6.60502	5.59662	6.83761	5.29248	11.7647	36.3636	52.5253	61.1111	51.0417	36.5385	60.3774	46.9388	47.1154	52.2936	42.7184	48	57.8947
4.56	2.48054	1.54919	3.54698	2.8732	3.5865	4.74308	3.4761	5.51601	5.99119	4.98442	6.71206	4.92126	3.19549	6.78694	6.64414	9.25926	4.36068	5.22648	2.97203	3.36889	2.54281	3.0007	5.06849	2.51282	2.98673	3.45711	3.39233	3.99787	4.42279	5.05415	6.90088	5.17241	6.34082	7.49736	6.30342	5.84958	13.4118	52.5253	49.4949	49.0741	65.625	52.8846	48.1132	68.3673	52.8846	44.9541	56.3107	45	47.3684
4.58	3.01556	2.28505	3.79589	3.87258	3.11181	4.11067	3.16574	4.53737	4.5815	4.28349	4.96109	5.61024	3.38346	7.04467	6.08108	7.09877	4.58241	5.05226	2.62238	3.20045	2.12766	4.11724	4.86301	2.71795	2.48894	3.45711	4.71976	3.41151	4.1979	3.97112	6.02258	6.22605	7.00132	4.75185	5.02137	5.01393	10.8235	53.5354	48.4848	50.9259	64.5833	56.7308	55.6604	52.0408	58.6538	52.2936	56.3107	56	47.3684
4.6	2.72374	2.0914	2.80025	3.74766	2.4789	3.39921	3.04159	5.78292	4.6696	4.28349	4.57198	5.41339	3.69674	5.49828	7.43243	6.32716	4.21286	4.09408	3.32168	3.2566	2.49092	3.07048	4.79452	2.87179	3.4292	3.71319	3.46608	2.87846	4.1979	3.75451	6.52447	6.70498	7.00132	4.54065	7.37179	6.03528	12.2353	55.5556	44.4444	50.9259	53.125	55.7692	40.566	40.8163	50.9615	44.9541	51.4563	51	63.1579
4.62	2.48054	2.13013	2.80025	3.49781	2.53165	3.95257	3.4761	5.24911	5.90308	3.27103	6.03113	5.41339	3.19549	4.811	6.19369	9.87654	4.28677	4.61672	3.14685	2.24593	2.6985	2.93091	3.49315	2.51282	2.8208	4.16133	3.39233	2.71855	3.44828	3.61011	8.28105	6.13027	6.20872	5.91341	6.51709	4.92108	12	48.4848	54.5455	48.1481	46.875	58.6538	53.7736	51.0204	65.3846	60.5505	39.8058	51	52.6316
4.64	2.23735	1.85902	2.9247	3.56027	2.74262	4.11067	2.66915	4.7153	5.28634	3.73832	6.61479	5.80709	3.13283	4.89691	6.53153	8.02469	2.88248	4.00697	3.2634	3.31275	2.38713	3.76832	3.76712	3.4359	2.93142	3.32907	3.61357	3.73134	4.49775	3.3935	5.77164	4.69349	6.47292	6.2302	5.34188	5.29248	10.3529	56.5657	47.4747	53.7037	61.4583	36.5385	65.0943	52.0408	31.7308	41.2844	45.6311	50	54.7368
4.66	3.11284	2.59489	3.48475	3.18551	3.27004	3.32016	3.4761	5.42705	3.87665	3.8162	5.54475	5.90551	4.69925	5.92784	6.64414	8.64198	3.54767	6.18467	3.20513	2.52667	3.00986	3.0007	3.56164	3.38462	2.93142	3.32907	2.80236	2.93177	5.17241	3.10469	5.89711	7.27969	5.81242	6.96938	6.30342	5.10678	9.64706	49.4949	53.5354	45.3704	45.8333	44.2308	38.6792	65.3061	61.5385	41.2844	41.7476	51	65.2632
4.68	2.91829	2.28505	3.42253	2.8732	3.2173	4.42688	3.22781	4.27046	4.5815	4.36137	5.44747	4.82283	3.50877	4.98282	5.85586	8.33333	3.54767	4.26829	2.5641	2.75126	3.16554	3.90789	3.69863	1.89744	2.98673	4.22535	3.09735	2.39872	2.9985	3.10469	5.64617	6.99234	6.86922	5.70222	5.44872	5.84958	13.6471	43.4343	54.5455	43.5185	50	42.3077	30.1887	57.1429	50.9615	47.7064	43.6893	45	51.5789
4.7	2.91829	1.78156	2.61357	3.81012	2.95359	4.18972	3.78647	4.4484	6.78414	4.51713	6.1284	7.48031	3.19549	4.55326	6.64414	9.72222	4.87805	3.91986	3.0303	2.02134	2.59471	4.11724	5.61644	1.79487	2.43363	3.71319	3.09735	2.61194	3.97301	3.3213	5.64617	6.03448	7.00132	5.27983	5.76923	4.45682	13.4118	47.4747	42.4242	45.3704	51.0417	52.8846	47.1698	45.9184	49.0385	35.7798	46.6019	33	38.9474
4.72	2.14008	2.32378	2.86248	3.81012	2.4789	4.58498	3.72439	5.07117	4.22907	3.8162	3.30739	5.21654	2.19298	4.46735	3.37838	7.87037	3.99113	5.31359	3.2634	2.91971	2.28334	4.95464	4.10959	2.5641	3.15265	3.20102	3.83481	3.2516	3.52324	2.96029	8.15558	5.2682	7.13342	5.91341	5.76923	3.71402	13.4118	52.5253	57.5758	50.9259	50	63.4615	50	47.9592	48.0769	51.3761	36.8932	76	40
4.74	2.86965	1.82029	3.11139	3.87258	2.21519	3.55731	3.16574	4.53737	3.34802	4.36137	4.96109	4.72441	3.44612	3.69416	5.06757	7.87037	3.7694	5.4878	2.91375	2.58282	2.17955	3.69853	3.56164	3.4359	3.15265	3.07298	3.76106	2.98507	4.34783	2.96029	6.14806	6.51341	5.01982	4.54065	5.66239	4.82823	10.1176	56.5657	49.4949	36.1111	61.4583	53.8462	55.6604	42.8571	44.2308	45.8716	56.3107	60	50.5263
4.76	2.91829	1.74284	2.42688	2.99813	2.4789	4.58498	3.28988	4.00356	4.49339	4.90654	4.18288	5.01969	3.69674	4.55326	4.72973	7.40741	4.06504	5.4007	3.0303	2.75126	2.49092	3.21005	3.56164	2.35897	2.21239	3.07298	4.35103	2.34542	4.12294	3.68231	7.15182	6.03448	4.75561	5.17423	6.08974	4.82823	11.0588	52.5253	51.5152	50.9259	52.0833	40.3846	49.0566	50	43.2692	42.2018	44.6602	44	38.9474
4.78	2.6751	1.93648	3.48475	2.93567	2.00422	3.47826	4.09683	4.89324	5.28634	4.20561	5.83658	3.93701	3.00752	4.63918	5.18018	6.32716	2.95639	4.52962	1.98135	2.30208	3.00986	3.97767	3.15068	2.71795	2.71018	2.88092	3.53982	2.29211	4.7976	4.18773	6.27353	5.65134	7.13342	4.96304	4.38034	5.47818	14.5882	46.4646	56.5657	46.2963	52.0833	51.9231	42.4528	56.1224	40.3846	46.789	40.7767	41	46.3158
4.8	2.57782	1.74284	2.61357	4.05996	2.74262	3.87352	2.97952	4.7153	4.5815	4.6729	6.22568	5.41339	3.57143	5.24055	5.51802	7.56173	4.21286	3.74564	2.85548	3.032	2.17955	3.62875	3.28767	2.5641	2.48894	3.39309	5.0885	2.71855	4.27286	4.04332	6.02258	4.5977	4.62351	5.59662	4.80769	4.27112	11.7647	65.6566	62.6263	50	50	48.0769	48.1132	50	57.6923	40.367	37.8641	47	45.2632
4.82	2.86965	2.24632	3.48475	3.37289	3.42827	3.55731	3.60025	4.7153	4.5815	4.6729	6.32296	4.33071	3.63409	5.41237	4.95495	6.6358	3.69549	4.52962	2.27273	3.032	2.54281	4.46615	3.76712	2.97436	2.10177	3.39309	3.24484	2.61194	3.44828	3.4657	6.64994	4.98084	6.86922	4.43506	5.76923	4.36397	13.1765	35.3535	52.5253	54.6296	52.0833	39.4231	47.1698	44.898	48.0769	52.2936	45.6311	41	61.0526
4.84	2.18872	1.51046	3.11139	3.24797	1.84599	3.55731	3.10366	3.91459	4.22907	3.97196	4.96109	4.62598	3.50877	4.38144	4.84234	6.01852	4.13895	3.83275	2.97203	2.24593	2.75039	2.93091	4.65753	2.15385	2.76549	3.45711	4.05605	3.2516	4.34783	3.89892	7.52823	4.98084	7.13342	5.27983	5.55556	4.82823	12.7059	43.4343	61.6162	44.4444	56.25	53.8462	48.1132	56.1224	48.0769	35.7798	43.6893	38	40
4.86	2.48054	1.23935	2.98693	2.68582	2.68987	3.083	2.7933	4.89324	4.75771	3.11526	4.47471	5.51181	2.88221	4.98282	5.74324	8.02469	4.28677	3.13589	2.91375	2.80741	3.26933	3.27983	4.86301	2.46154	2.71018	2.4968	3.53982	2.77186	2.9985	3.61011	6.399	5.65134	4.75561	6.3358	5.87607	4.08542	13.8824	38.3838	50.5051	38.8889	68.75	50.9615	50.9434	58.1633	39.4231	45.8716	53.3981	72	55.7895
4.88	2.6751	1.54919	2.17797	4.05996	2.95359	3.24111	3.16574	5.24911	4.84581	4.04984	4.86381	4.82283	2.63158	4.38144	5.63063	7.09877	4.06504	5.4007	3.37995	3.1443	2.6466	2.51221	4.31507	2.71795	2.71018	2.94494	3.39233	2.71855	3.44828	3.89892	6.27353	4.21456	7.13342	5.06864	4.48718	4.73538	12.4706	49.4949	39.3939	36.1111	66.6667	38.4615	46.2264	24.4898	57.6923	31.1927	48.5437	38	50.5263
4.9	2.52918	1.66538	2.80025	3.12305	2.58439	4.42688	3.72439	4.09253	4.22907	3.97196	5.05837	5.11811	2.69424	5.49828	4.72973	8.48765	3.0303	4.18118	2.73893	2.24593	2.95797	2.86113	3.42466	2.82051	2.93142	2.94494	3.68732	2.87846	4.12294	3.4657	6.14806	5.36398	5.54822	5.91341	6.08974	4.92108	12	51.5152	57.5758	43.5185	52.0833	48.0769	54.717	44.898	51.9231	48.6239	62.1359	42	51.5789
4.92	2.72374	1.74284	2.86248	3.43535	2.90084	2.7668	3.60025	5.07117	4.31718	4.04984	4.96109	5.90551	2.81955	4.55326	5.06757	6.6358	2.66075	4.26829	3.37995	2.41437	1.7644	4.46615	3.76712	2.61538	3.20796	3.77721	4.35103	1.54584	3.89805	3.68231	6.77541	5.17241	5.68032	6.75818	7.47863	4.82823	13.6471	48.4848	47.4747	30.5556	42.7083	51.9231	35.8491	47.9592	50	41.2844	44.6602	45	48.4211
4.94	2.77237	1.66538	2.86248	2.99813	2.16245	3.63636	3.16574	4.89324	4.6696	4.82866	3.50195	4.42913	2.38095	5.15464	5.96847	9.41358	3.39985	3.83275	3.32168	2.80741	2.6466	3.69853	3.63014	2.5641	2.48894	3.64917	3.61357	2.50533	3.74813	3.1769	5.77164	5.2682	6.60502	6.1246	5.55556	5.01393	9.41176	45.4545	54.5455	42.5926	45.8333	39.4231	40.566	43.8776	50.9615	33.0275	63.1068	47	40
4.96	2.38327	2.05267	4.0448	3.12305	2.8481	4.11067	3.97269	5.96085	4.14097	4.20561	4.76654	4.13386	2.69424	4.38144	6.41892	8.33333	2.95639	4.52962	3.55478	2.69512	2.54281	3.21005	3.42466	2.51282	2.87611	2.36876	3.76106	2.87846	2.84858	3.89892	6.14806	5.55556	6.07662	5.27983	5.66239	4.92108	11.5294	49.4949	33.3333	53.7037	37.5	40.3846	53.7736	46.9388	37.5	43.1193	59.2233	40	38.9474
4.98	2.86965	1.62665	2.98693	3.18551	2.58439	5.37549	2.60708	4.7153	4.22907	4.6729	5.7393	5.70866	2.38095	4.63918	4.84234	5.24691	3.47376	4.00697	3.2634	1.96519	2.43902	3.0007	4.10959	2.10256	2.43363	3.26504	3.39233	2.23881	4.12294	3.53791	5.89711	5.17241	7.66182	5.70222	6.51709	5.01393	7.76471	40.404	55.5556	46.2963	59.375	43.2692	41.5094	41.8367	34.6154	42.2018	43.6893	46	41.0526
5	2.23735	1.35554	3.29807	3.24797	2.8481	3.16206	2.7933	3.82562	4.31718	4.6729	4.86381	4.23228	2.63158	4.20962	4.95495	7.09877	3.84331	4.52962	3.14685	2.30208	2.28334	3.27983	2.94521	2.51282	2.32301	2.88092	4.05605	2.82516	3.74813	4.11552	4.76788	5.07663	7.52972	6.1246	5.76923	5.10678	11.7647	56.5657	36.3636	42.5926	55.2083	45.1923	41.5094	30.6122	45.1923	36.6972	34.9515	46	43.1579
5.02	3.01556	1.85902	3.54698	3.12305	2.26793	4.11067	3.4761	4.35943	5.81498	3.97196	4.76654	4.52756	3.50877	4.72509	5.18018	6.17284	3.25203	4.3554	2.73893	2.52667	2.90607	3.76832	3.63014	2.87179	1.99115	2.43278	3.17109	2.1855	3.74813	3.61011	6.399	3.2567	6.60502	6.3358	6.41026	4.45682	12	47.4747	49.4949	37.037	44.7917	41.3462	48.1132	38.7755	38.4615	36.6972	32.0388	49	41.0526
5.04	2.43191	1.70411	3.29807	3.18551	2.74262	3.71542	3.16574	4.27046	4.49339	3.11526	4.86381	5.51181	3.63409	4.20962	5.06757	8.17901	3.69549	4.79094	3.2634	2.18978	2.49092	3.0007	3.83562	2.41026	2.21239	3.45711	3.53982	2.23881	3.97301	3.10469	5.01882	3.73563	5.54822	5.59662	5.66239	5.10678	8.70588	39.3939	46.4646	47.2222	40.625	35.5769	36.7925	42.8571	45.1923	44.9541	42.7184	36	47.3684
5.06	2.96693	2.24632	1.99129	2.31106	2.37342	3.32016	3.41403	4.53737	4.14097	3.34891	4.47471	5.31496	3.38346	4.46735	5.51802	5.40123	3.62158	4.18118	2.68065	2.02134	1.81629	2.44243	4.24658	2.82051	2.2677	2.8169	4.27729	2.23881	3.52324	2.31047	7.77917	5.9387	6.60502	5.91341	6.41026	4.36397	7.29412	47.4747	42.4242	36.1111	40.625	42.3077	43.3962	33.6735	38.4615	41.2844	61.165	50	49.4737
5.08	2.72374	1.58792	2.67579	3.24797	2.74262	3.55731	3.10366	4.35943	4.49339	3.89408	5.54475	5.41339	2.88221	3.60825	5.51802	7.25309	3.39985	4.3554	2.85548	1.40371	2.54281	3.34962	4.72603	2.35897	3.04204	3.137	3.24484	2.29211	3.44828	2.74368	6.27353	4.98084	6.60502	5.70222	5.76923	3.15692	10.1176	48.4848	49.4949	45.3704	66.6667	46.1538	52.8302	44.898	36.5385	33.0275	35.9223	39	49.4737
5.1	2.52918	1.97521	2.42688	3.31043	2.74262	4.18972	3.22781	4.4484	3.52423	4.28349	5.83658	4.33071	3.3208	4.98282	5.63063	7.09877	2.66075	3.3101	2.50583	2.13363	2.23145	3.4194	3.83562	2.5641	2.98673	2.94494	4.71976	2.23881	4.04798	3.68231	5.89711	4.88506	4.75561	4.54065	5.34188	4.54968	10.1176	43.4343	55.5556	54.6296	40.625	48.0769	34.9057	37.7551	48.0769	36.6972	39.8058	44	48.4211
5.12	2.52918	1.66538	3.11139	3.37289	2.21519	4.90119	2.73122	4.7153	4.40529	3.73832	4.37743	4.42913	2.81955	4.20962	4.61712	7.25309	2.36511	5.4007	2.5641	2.69512	2.23145	3.0007	4.10959	2.30769	3.04204	3.07298	3.68732	2.82516	3.29835	2.81588	5.5207	6.03448	5.54822	5.17423	5.12821	5.47818	9.64706	44.4444	41.4141	43.5185	55.2083	31.7308	45.283	51.0204	37.5	44.9541	36.8932	46	50.5263
5.14	1.94553	1.89775	2.98693	3.31043	2.63713	3.47826	2.85537	4.89324	4.05286	4.20561	5.25292	3.74016	3.69674	3.86598	5.18018	7.09877	2.80857	4.18118	2.7972	2.41437	2.12766	3.07048	4.93151	1.69231	2.59956	2.75288	3.61357	2.23881	4.72264	3.2491	5.64617	4.78927	4.49141	5.17423	3.73932	3.24977	10.5882	54.5455	42.4242	51.8519	39.5833	38.4615	42.4528	43.8776	40.3846	32.1101	39.8058	41	38.9474
5.16	2.6751	1.62665	2.9247	3.24797	2.53165	3.79447	3.04159	4.62633	3.87665	4.51713	4.96109	3.93701	2.75689	4.55326	4.84234	6.48148	3.39985	3.83275	2.73893	2.35823	2.54281	3.34962	3.28767	2.15385	2.54425	3.137	3.39233	1.97228	3.22339	3.3213	5.77164	4.5977	7.13342	6.54699	5.02137	4.27112	12.2353	56.5657	42.4242	33.3333	61.4583	34.6154	40.566	44.898	42.3077	37.6147	43.6893	49	47.3684
5.18	2.14008	1.54919	2.30243	2.74828	2.16245	4.18972	3.35196	4.7153	4.22907	3.50467	5.83658	5.51181	2.81955	5.32646	4.84234	7.40741	2.73466	4.18118	2.91375	2.41437	2.59471	3.48918	3.56164	2.25641	2.10177	3.39309	2.58112	2.82516	3.89805	2.67148	6.399	4.11877	6.07662	4.64625	5.44872	3.80687	11.7647	47.4747	53.5354	37.037	42.7083	37.5	38.6792	41.8367	34.6154	34.8624	37.8641	48	43.1579
5.2	2.57782	1.97521	2.55134	2.8732	2.37342	3.083	2.73122	4.18149	4.5815	3.58255	4.57198	4.92126	3.00752	4.55326	5.74324	8.17901	4.5085	4.18118	3.4965	1.45985	2.28334	3.48918	3.63014	2.30769	2.10177	2.75288	2.87611	1.91898	3.52324	3.97112	5.5207	5.84291	4.62351	5.06864	7.15812	5.19963	10.8235	42.4242	36.3636	31.4815	44.7917	36.5385	45.283	51.0204	37.5	47.7064	44.6602	38	42.1053
5.22	2.18872	1.54919	2.55134	2.93567	2.16245	4.18972	3.28988	3.20285	4.22907	4.82866	4.0856	6.98819	2.88221	4.20962	4.72973	5.40123	3.47376	3.3101	2.62238	2.02134	2.6466	2.30286	3.08219	1.89744	2.21239	3.137	3.24484	2.1322	3.82309	2.23827	6.27353	4.02299	5.01982	4.85744	5.87607	4.73538	8.70588	55.5556	45.4545	47.2222	63.5417	37.5	50	45.9184	44.2308	33.945	34.9515	47	32.6316
5.24	2.72374	1.85902	2.80025	3.87258	2.58439	3.39921	2.73122	4.09253	4.75771	3.8162	3.89105	5.11811	2.75689	4.29553	5.29279	9.5679	3.32594	4.70383	1.98135	2.02134	2.02387	3.62875	3.83562	2.15385	2.04646	2.30474	3.0236	2.45203	3.67316	3.53791	5.39523	5.36398	5.54822	4.96304	5.76923	4.64253	12.9412	52.5253	42.4242	32.4074	37.5	37.5	35.8491	42.8571	42.3077	34.8624	41.7476	42	49.4737
5.26	2.09144	1.31681	2.30243	3.93504	2.90084	3.00395	2.7933	4.62633	3.43612	4.12773	5.25292	5.51181	3.19549	4.63918	6.53153	6.79012	3.7694	3.83275	2.38928	2.47052	2.28334	3.4194	3.63014	2.20513	2.59956	2.43278	3.83481	3.19829	3.29835	3.68231	4.89335	4.98084	5.68032	5.70222	5.55556	4.08542	9.41176	43.4343	42.4242	40.7407	43.75	43.2692	35.8491	52.0408	37.5	30.2752	57.2816	45	41.0526
5.28	2.33463	1.62665	2.61357	3.18551	2.37342	3.47826	2.48293	4.62633	3.96476	3.8162	4.76654	4.82283	3.25815	4.20962	3.94144	6.6358	2.36511	3.39721	2.44755	2.13363	2.54281	3.4194	3.69863	3.17949	2.43363	1.85659	3.76106	1.97228	3.44828	2.81588	5.26976	4.88506	5.54822	5.17423	5.66239	3.99257	13.1765	41.4141	43.4343	38.8889	47.9167	46.1538	35.8491	52.0408	40.3846	32.1101	25.2427	38	45.2632
5.3	1.79961	2.20759	2.48911	3.6852	2.4789	3.32016	2.545	3.64769	4.14097	3.42679	5.25292	5.31496	4.19799	4.63918	5.06757	6.32716	3.91722	3.74564	2.0979	1.90904	2.12766	2.51221	3.35616	2.51282	3.20796	2.4968	3.46608	2.29211	3.29835	3.3935	5.14429	5.36398	5.15192	6.65259	6.51709	4.73538	11.2941	45.4545	42.4242	44.4444	43.75	41.3462	46.2264	44.898	38.4615	41.2844	38.835	43	44.2105
5.32	2.43191	1.70411	2.80025	3.6852	2.1097	3.63636	2.7933	4.27046	4.05286	3.58255	4.76654	3.64173	2.56892	4.811	4.61712	6.48148	2.21729	4.61672	2.331	2.07748	2.17955	3.0007	3.15068	2.15385	2.65487	2.88092	2.94985	2.02559	3.22339	3.03249	5.64617	4.69349	4.88771	4.01267	6.19658	5.10678	9.64706	43.4343	47.4747	54.6296	47.9167	36.5385	41.5094	41.8367	48.0769	29.3578	42.7184	37	51.5789
5.34	2.72374	1.74284	2.67579	3.62274	1.84599	3.39921	4.09683	5.24911	3.43612	3.42679	4.37743	5.41339	3.44612	3.95189	4.27928	7.71605	2.95639	4.44251	2.15618	2.35823	2.59471	2.51221	4.31507	2.66667	2.76549	2.24072	2.87611	1.70576	4.94753	2.88809	5.14429	5.07663	6.20872	5.27983	5.55556	3.62117	12.2353	44.4444	45.4545	44.4444	41.6667	48.0769	46.2264	44.898	37.5	44.0367	35.9223	42	42.1053
5.36	2.52918	1.70411	2.98693	3.12305	2.37342	3.63636	2.85537	4.35943	4.31718	4.90654	5.15564	3.24803	3.44612	3.35052	4.61712	7.09877	3.54767	3.57143	2.62238	2.58282	3.16554	2.65178	3.83562	2.15385	2.76549	2.88092	3.17109	2.39872	4.27286	2.88809	5.01882	5.17241	5.15192	3.90707	4.38034	3.62117	12	35.3535	38.3838	42.5926	59.375	44.2308	40.566	29.5918	35.5769	37.6147	39.8058	53	52.6316
5.38	2.38327	1.85902	2.48911	2.62336	2.53165	3.63636	3.66232	3.82562	4.75771	4.43925	4.47471	5.01969	2.94486	4.20962	4.05405	7.87037	2.43902	4.18118	2.7972	3.1443	2.17955	2.86113	3.49315	2.61538	2.76549	2.43278	3.68732	2.07889	3.82309	4.04332	5.39523	4.02299	6.34082	2.85111	5.66239	5.38533	6.35294	39.3939	39.3939	40.7407	41.6667	39.4231	37.7358	40.8163	40.3846	35.7798	43.6893	37	36.8421
5.4	1.70233	1.47173	3.11139	2.74828	2.74262	3.71542	3.4761	5.24911	2.81938	3.97196	4.76654	5.31496	3.25815	3.60825	4.5045	7.25309	2.88248	3.65854	2.50583	3.2566	2.54281	2.09351	4.10959	2.25641	2.76549	3.45711	3.0236	2.02559	4.42279	2.67148	4.266	4.88506	5.54822	5.06864	4.2735	3.89972	9.41176	46.4646	46.4646	32.4074	41.6667	36.5385	27.3585	40.8163	34.6154	27.5229	41.7476	43	38.9474
5.42	1.79961	1.70411	2.9247	2.37352	2.32068	4.58498	2.7933	4.00356	4.40529	4.43925	4.47471	4.62598	3.50877	4.63918	2.7027	8.17901	3.32594	4.52962	2.7972	2.80741	2.59471	3.34962	4.10959	2.20513	2.37832	3.00896	3.31858	1.86567	3.82309	3.82671	5.64617	5.07663	4.22721	3.48469	6.19658	5.10678	12.2353	46.4646	34.3434	47.2222	40.625	38.4615	41.5094	36.7347	48.0769	40.367	42.7184	37	49.4737
5.44	2.33463	1.85902	2.48911	2.99813	2.37342	3.95257	2.66915	4.98221	3.87665	3.42679	3.79377	3.93701	2.75689	4.55326	4.27928	8.48765	3.62158	3.39721	2.331	2.35823	2.6985	3.07048	3.15068	2.15385	2.15708	3.00896	2.94985	2.39872	4.04798	2.16606	5.01882	5.17241	4.22721	5.49102	6.73077	4.82823	9.17647	42.4242	50.5051	37.963	47.9167	44.2308	43.3962	39.7959	39.4231	35.7798	37.8641	50	47.3684
5.46	1.89689	1.66538	1.86683	2.74828	2.37342	3.79447	2.73122	4.98221	4.84581	3.03738	4.86381	4.42913	3.44612	4.72509	4.61712	5.8642	2.51293	3.3101	2.50583	3.36889	1.7644	3.34962	3.15068	1.84615	1.93584	3.20102	2.28614	2.45203	3.52324	3.89892	5.5207	5.17241	4.75561	4.22386	3.95299	4.92108	8.23529	43.4343	42.4242	37.037	39.5833	36.5385	34.9057	35.7143	37.5	29.3578	33.0097	30	50.5263
5.48	2.33463	1.51046	2.86248	3.06059	1.74051	3.32016	2.66915	4.4484	3.43612	3.34891	3.98833	5.51181	3.13283	4.12371	3.94144	6.79012	3.10421	3.39721	2.44755	2.75126	2.12766	3.48918	3.90411	2.35897	2.37832	2.88092	2.72861	2.07889	4.1979	3.97112	6.14806	5.07663	4.35931	4.96304	4.48718	4.17827	7.76471	47.4747	37.3737	37.037	50	50	32.0755	47.9592	38.4615	40.367	37.8641	40	37.8947
5.5	2.62646	1.23935	1.99129	3.24797	1.95148	2.52964	2.48293	3.73665	3.78855	4.43925	4.66926	4.52756	2.81955	3.35052	4.61712	8.33333	3.25203	4.00697	2.50583	1.96519	2.28334	3.62875	4.0411	1.84615	1.65929	3.20102	3.68732	2.39872	2.84858	3.82671	5.39523	4.69349	6.07662	3.37909	4.91453	3.71402	10.3529	42.4242	44.4444	30.5556	45.8333	37.5	41.5094	47.9592	48.0769	29.3578	38.835	30	38.9474
5.52	2.38327	1.58792	2.67579	3.12305	2.53165	3.32016	2.97952	4.35943	3.43612	3.34891	4.18288	4.82283	3.07018	4.55326	5.29279	7.71605	2.21729	5.13937	3.0303	1.85289	1.97198	3.8381	3.42466	1.28205	2.37832	3.84123	3.68732	2.50533	4.1979	2.59928	4.14053	5.74713	5.15192	4.96304	5.34188	3.99257	11.5294	29.2929	46.4646	19.4444	51.0417	38.4615	50	39.7959	44.2308	38.5321	34.9515	34	43.1579
5.54	2.18872	1.66538	2.36465	2.93567	2.90084	3.55731	2.66915	4.4484	3.52423	3.73832	4.76654	4.92126	1.8797	4.12371	4.95495	4.78395	2.66075	3.83275	2.38928	2.86356	2.59471	2.86113	3.49315	2.71795	1.93584	2.94494	3.39233	2.39872	3.74813	3.61011	5.64617	4.69349	5.81242	4.43506	5.02137	3.99257	9.88235	33.3333	44.4444	33.3333	50	50	39.6226	42.8571	51.9231	37.6147	44.6602	43	42.1053
5.56	2.72374	1.39427	2.67579	3.31043	1.89873	4.58498	3.60025	3.55872	4.14097	3.97196	4.96109	3.64173	2.44361	3.86598	4.72973	7.56173	3.91722	3.74564	2.62238	2.58282	2.33524	3.27983	4.17808	1.48718	2.37832	2.24072	3.90855	2.66525	3.22339	2.52708	4.64241	4.69349	5.01982	5.91341	3.4188	4.45682	10.5882	34.3434	50.5051	36.1111	41.6667	29.8077	24.5283	37.7551	39.4231	33.0275	29.1262	47	35.7895
5.58	2.18872	1.54919	2.42688	2.93567	2.00422	3.16206	2.60708	4.09253	4.6696	3.58255	3.6965	4.03543	3.25815	3.00687	4.84234	6.6358	2.88248	4.09408	2.03963	2.35823	1.50493	2.93091	3.35616	1.69231	2.2677	2.30474	2.72861	2.23881	3.74813	2.81588	5.89711	3.9272	4.88771	4.22386	3.09829	3.80687	12.2353	38.3838	41.4141	35.1852	44.7917	33.6538	42.4528	35.7143	42.3077	35.7798	35.9223	39	43.1579
5.6	2.14008	1.89775	2.2402	2.68582	2.16245	3.79447	2.545	3.64769	2.81938	3.97196	3.79377	4.72441	3.25815	3.17869	5.40541	4.78395	2.66075	3.83275	1.80653	1.7406	2.17955	3.34962	3.56164	1.58974	2.21239	3.32907	3.68732	2.1855	3.37331	3.10469	4.51694	5.07663	4.88771	3.80148	4.48718	4.08542	9.17647	46.4646	46.4646	32.4074	42.7083	44.2308	50	40.8163	27.8846	34.8624	40.7767	42	50.5263
5.62	2.43191	1.82029	2.73802	2.62336	2.53165	4.42688	2.60708	4.09253	4.5815	2.9595	3.89105	5.11811	3.50877	4.12371	4.5045	4.93827	2.95639	4.79094	3.0303	1.79674	2.54281	2.72156	3.28767	1.23077	1.88053	2.1767	3.24484	2.07889	3.74813	2.81588	5.26976	5.55556	4.62351	5.17423	4.80769	2.59981	8	43.4343	32.3232	28.7037	44.7917	33.6538	32.0755	44.898	43.2692	33.0275	45.6311	47	47.3684
5.64	2.6751	1.78156	3.48475	3.24797	2.4789	3.00395	2.7933	3.55872	4.14097	3.34891	3.89105	4.62598	2.94486	3.78007	5.29279	5.55556	2.73466	4.96516	2.91375	2.30208	2.12766	3.14027	2.60274	2.05128	2.65487	2.1767	3.17109	3.2516	3.74813	3.4657	4.51694	5.2682	4.75561	4.11827	3.4188	4.92108	8.23529	37.3737	33.3333	47.2222	41.6667	43.2692	40.566	42.8571	51.9231	30.2752	36.8932	50	45.2632
5.66	1.94553	1.58792	2.9247	1.4366	2.32068	3.39921	3.4761	4.09253	4.22907	4.43925	4.18288	5.01969	2.44361	4.0378	4.95495	6.79012	2.73466	3.65854	2.44755	2.24593	2.07577	2.44243	2.67123	1.84615	2.48894	2.75288	3.90855	2.07889	3.14843	2.59928	6.64994	4.78927	4.62351	4.54065	5.23504	5.01393	8.94118	38.3838	46.4646	36.1111	37.5	48.0769	37.7358	39.7959	36.5385	38.5321	40.7767	41	34.7368
5.68	1.75097	1.54919	2.36465	2.74828	2.00422	3.71542	2.48293	4.89324	2.99559	3.8162	4.37743	4.13386	3.25815	3.00687	4.61712	5.8642	2.66075	4.3554	2.331	2.02134	1.81629	2.93091	3.0137	1.89744	2.48894	2.8169	3.0236	1.54584	2.77361	2.96029	5.26976	5.2682	5.15192	6.2302	5.44872	3.52832	10.5882	46.4646	48.4848	31.4815	43.75	31.7308	36.7925	40.8163	39.4231	30.2752	34.9515	40	42.1053
5.7	1.94553	1.70411	2.2402	2.31106	2.1097	4.18972	3.04159	3.29181	3.52423	4.12773	4.18288	4.52756	2.3183	3.86598	4.84234	7.40741	2.80857	3.74564	1.8648	2.07748	2.43902	2.93091	4.10959	1.89744	2.15708	2.75288	2.65487	2.1322	3.74813	3.03249	5.01882	3.83142	4.88771	4.01267	4.48718	4.36397	11.0588	44.4444	39.3939	28.7037	36.4583	36.5385	41.5094	36.7347	31.7308	30.2752	37.8641	38	45.2632
5.72	1.84825	1.31681	3.11139	2.24859	2.42616	3.55731	3.22781	5.51601	4.75771	3.58255	3.59922	4.52756	2.25564	3.86598	5.63063	7.25309	2.14339	3.83275	2.68065	2.35823	2.85418	2.65178	2.60274	1.84615	2.32301	2.62484	2.72861	2.29211	2.84858	2.96029	5.64617	4.5977	4.75561	4.96304	4.91453	4.45682	8.70588	29.2929	32.3232	38.8889	48.9583	41.3462	33.9623	39.7959	31.7308	26.6055	52.4272	40	31.5789
5.74	2.33463	1.70411	3.11139	3.06059	2.4789	3.00395	3.41403	4.09253	5.11013	3.34891	4.28016	5.11811	3.13283	3.17869	4.61712	5.55556	3.17812	3.74564	2.03963	2.18978	2.6985	2.86113	4.10959	1.74359	2.10177	2.1767	2.58112	2.02559	3.37331	3.2491	4.76788	3.9272	4.75561	3.37909	3.95299	4.92108	8.23529	41.4141	42.4242	30.5556	42.7083	46.1538	48.1132	34.6939	30.7692	31.1927	33.9806	45	36.8421
5.76	2.23735	1.58792	2.2402	2.31106	1.79325	2.84585	2.60708	3.73665	3.43612	2.9595	4.28016	4.72441	2.88221	5.32646	4.84234	5.70988	2.73466	3.91986	2.21445	1.85289	2.28334	3.21005	3.69863	2.15385	2.15708	2.43278	3.0236	1.86567	2.77361	2.59928	3.88959	4.78927	4.62351	5.49102	4.16667	4.64253	9.88235	31.3131	38.3838	42.5926	36.4583	32.6923	42.4528	33.6735	33.6538	41.2844	38.835	34	33.6842
5.78	2.52918	1.51046	3.29807	2.49844	2.16245	3.16206	2.73122	2.93594	3.61233	3.34891	4.28016	6.29921	2.38095	3.95189	4.61712	7.56173	3.54767	4.18118	2.5641	1.85289	1.97198	3.27983	4.10959	2.05128	2.21239	2.30474	3.31858	2.50533	2.09895	2.88809	5.01882	4.5977	4.88771	4.96304	4.59402	3.80687	9.17647	35.3535	44.4444	48.1481	39.5833	42.3077	33.9623	42.8571	38.4615	39.4495	32.0388	49	40
5.8	2.33463	2.0914	2.86248	1.99875	2.21519	4.18972	2.7933	4.27046	4.5815	2.80374	5.64202	4.72441	2.81955	2.92096	4.61712	6.79012	2.88248	3.39721	1.92308	1.85289	1.81629	2.93091	3.90411	1.94872	2.2677	2.36876	2.72861	2.87846	2.69865	2.81588	5.01882	4.5977	4.88771	4.11827	4.59402	4.36397	11.2941	41.4141	31.3131	46.2963	43.75	32.6923	28.3019	37.7551	53.8462	22.9358	39.8058	24	33.6842
5.82	2.57782	1.47173	2.42688	2.93567	2.37342	3.71542	1.92427	4.00356	3.87665	4.12773	4.76654	3.83858	2.50627	3.09278	5.51802	8.17901	2.88248	3.57143	2.03963	1.90904	2.33524	2.65178	4.17808	1.4359	2.32301	3.58515	2.80236	2.34542	3.5982	2.59928	4.14053	3.73563	5.94452	2.95671	5.12821	4.82823	8.70588	45.4545	42.4242	37.037	43.75	31.7308	27.3585	45.9184	32.6923	35.7798	38.835	35	30.5263
5.84	2.14008	1.58792	2.30243	2.12367	2.4789	3.55731	2.66915	3.29181	4.31718	3.03738	2.72374	4.82283	2.50627	3.69416	4.84234	3.85802	2.43902	3.04878	1.74825	2.18978	2.28334	2.02373	3.0137	1.84615	2.2677	2.56082	2.72861	2.1855	3.22339	2.81588	4.51694	4.21456	4.75561	4.43506	5.02137	2.87837	10.1176	35.3535	31.3131	39.8148	37.5	39.4231	35.8491	39.7959	33.6538	27.5229	35.9223	37	38.9474
5.86	2.48054	1.54919	2.11574	2.43598	2.32068	4.34783	2.91744	3.73665	2.99559	3.19315	4.18288	5.70866	3.13283	3.17869	4.5045	5.55556	2.58684	3.74564	1.80653	1.68445	2.43902	2.86113	3.63014	2.20513	2.21239	2.56082	3.24484	2.77186	2.69865	3.1769	4.14053	4.21456	6.20872	4.01267	5.44872	2.69266	10.3529	38.3838	50.5051	36.1111	43.75	40.3846	36.7925	38.7755	34.6154	17.4312	30.0971	47	44.2105
5.88	2.52918	1.00697	2.30243	2.81074	1.95148	2.52964	2.17256	3.46975	3.34802	3.11526	4.37743	5.41339	2.75689	3.78007	5.40541	6.32716	2.95639	3.65854	2.38928	1.79674	2.17955	3.14027	3.42466	2.15385	2.32301	2.68886	2.80236	1.81237	3.74813	1.80505	4.64241	3.73563	5.41612	4.75185	4.59402	3.80687	7.76471	42.4242	39.3939	36.1111	39.5833	44.2308	37.7358	35.7143	39.4231	36.6972	42.7184	35	41.0526
5.9	1.79961	1.97521	3.11139	2.43598	2.1097	3.87352	2.73122	3.29181	3.34802	3.50467	4.57198	2.85433	3.07018	5.32646	3.94144	4.93827	2.58684	4.00697	1.92308	2.13363	1.7644	3.14027	3.15068	1.89744	1.99115	2.94494	2.65487	2.55864	2.47376	2.81588	3.51317	5.2682	5.28402	4.96304	2.77778	4.64253	11.0588	45.4545	40.404	27.7778	41.6667	41.3462	33.9623	28.5714	32.6923	36.6972	44.6602	36	34.7368
5.92	1.89689	1.08443	2.55134	3.06059	2.05696	3.083	3.04159	3.46975	3.52423	2.80374	3.59922	3.83858	3.00752	3.69416	4.95495	6.48148	3.32594	2.96167	2.91375	1.85289	1.81629	3.07048	3.9726	2.46154	2.2677	3.39309	2.72861	1.91898	2.77361	2.59928	5.01882	6.03448	4.09511	4.43506	5.02137	4.64253	10.1176	32.3232	40.404	31.4815	42.7083	25.9615	37.7358	34.6939	37.5	39.4495	30.0971	37	40
5.94	2.0428	1.51046	2.17797	3.06059	2.53165	3.32016	2.35878	4.18149	2.37885	3.19315	3.79377	3.83858	2.63158	3.52234	2.92793	4.78395	3.32594	4.44251	2.21445	2.47052	1.66061	2.79135	3.69863	1.94872	2.37832	2.30474	2.58112	1.81237	2.77361	2.45487	5.14429	3.83142	5.28402	3.80148	5.12821	4.54968	8	38.3838	33.3333	36.1111	50	30.7692	32.0755	36.7347	40.3846	25.6881	39.8058	33	43.1579
5.96	2.18872	1.23935	1.8046	1.81137	2.05696	3.24111	2.97952	4.35943	3.61233	3.19315	4.76654	3.44488	2.81955	4.20962	4.5045	5.40123	2.73466	3.57143	2.27273	2.58282	2.17955	2.16329	3.42466	1.64103	2.04646	2.62484	2.58112	1.75906	2.47376	3.1769	5.77164	4.78927	5.54822	4.64625	4.05983	4.64253	8	38.3838	43.4343	38.8889	51.0417	32.6923	30.1887	36.7347	29.8077	33.0275	35.9223	42	31.5789
5.98	2.18872	1.58792	2.86248	2.37352	1.84599	3.55731	2.29671	4.18149	3.0837	3.19315	3.59922	4.03543	2.88221	3.95189	4.84234	5.55556	3.17812	2.61324	1.98135	2.13363	2.02387	2.51221	3.08219	2.25641	2.10177	2.94494	3.24484	1.70576	3.74813	3.10469	5.5207	3.35249	3.30251	4.22386	5.55556	3.52832	10.3529	38.3838	33.3333	32.4074	39.5833	26.9231	34.9057	33.6735	34.6154	29.3578	28.1553	32	37.8947
6	1.21595	1.16189	2.2402	2.12367	1.95148	3.083	2.97952	4.18149	3.34802	2.88162	3.98833	4.23228	2.75689	3.00687	4.16667	4.01235	2.43902	4.09408	2.62238	2.58282	2.28334	3.4194	3.49315	1.84615	1.82522	2.56082	2.80236	2.39872	2.84858	2.23827	5.14429	4.88506	5.01982	4.64625	5.12821	3.62117	10.5882	33.3333	41.4141	29.6296	42.7083	32.6923	30.1887	32.6531	34.6154	32.1101	33.9806	47	46.3158
6.02	1.84825	1.70411	1.74238	2.68582	1.58228	2.52964	2.85537	3.29181	3.25991	2.72586	4.18288	3.64173	2.75689	3.52234	4.16667	6.01852	2.2912	3.57143	1.92308	2.30208	2.23145	3.07048	4.0411	1.74359	2.04646	2.56082	2.50737	2.29211	2.84858	2.52708	5.77164	3.73563	3.43461	4.54065	4.2735	4.17827	10.8235	27.2727	34.3434	37.963	44.7917	28.8462	41.5094	38.7755	29.8077	26.6055	31.068	48	29.4737
6.04	1.6537	1.39427	2.80025	2.8732	1.84599	3.71542	2.545	4.09253	3.61233	3.42679	3.98833	4.13386	2.06767	3.2646	4.61712	4.78395	2.80857	2.78746	2.21445	2.07748	2.07577	3.14027	3.63014	2	2.37832	2.24072	3.17109	3.03838	2.3988	3.2491	4.76788	4.50192	5.94452	4.96304	3.84615	5.19963	7.29412	43.4343	32.3232	32.4074	33.3333	32.6923	37.7358	33.6735	34.6154	27.5229	27.1845	49	33.6842
6.06	1.75097	1.93648	2.17797	2.8732	1.68776	3.63636	2.66915	3.64769	3.87665	3.19315	4.57198	4.23228	1.8797	4.29553	4.27928	6.79012	3.0303	3.3101	2.85548	1.7406	2.33524	2.65178	2.53425	2	1.60398	2.1767	2.28614	1.81237	3.22339	3.10469	4.14053	4.21456	5.54822	2.85111	5.12821	4.27112	5.64706	39.3939	42.4242	32.4074	50	29.8077	31.1321	38.7755	42.3077	20.1835	41.7476	33	29.4737
6.08	2.09144	1.433	2.17797	1.74891	1.52954	3.24111	2.73122	3.91459	2.90749	3.34891	3.98833	3.93701	2.88221	3.00687	4.27928	5.40123	3.25203	4.61672	2.03963	2.13363	2.17955	2.79135	2.26027	1.84615	2.15708	2.36876	3.39233	2.29211	3.5982	3.03249	3.26223	3.73563	4.62351	3.37909	4.2735	3.62117	8.47059	34.3434	28.2828	36.1111	29.1667	26.9231	38.6792	45.9184	42.3077	31.1927	36.8932	36	36.8421
6.1	1.99416	1.0457	2.11574	3.12305	1.95148	3.24111	1.92427	3.29181	3.96476	4.12773	4.66926	5.11811	2.44361	4.0378	5.06757	7.40741	2.21729	3.04878	2.85548	1.516	2.28334	2.93091	2.73973	1.94872	2.21239	2.24072	2.58112	2.34542	2.77361	2.96029	5.39523	4.78927	4.62351	4.43506	4.80769	4.27112	9.17647	27.2727	41.4141	33.3333	36.4583	26.9231	34.9057	37.7551	27.8846	40.367	35.9223	43	40
6.12	2.18872	1.54919	1.86683	3.43535	1.63502	3.32016	2.48293	3.55872	5.28634	3.97196	4.96109	3.64173	2.19298	3.95189	5.06757	6.48148	3.10421	3.65854	2.21445	2.13363	1.55682	3.0007	3.35616	2.20513	1.7146	2.1767	2.80236	1.81237	2.84858	3.3935	4.39147	3.73563	5.81242	3.48469	4.38034	3.43547	8.94118	33.3333	38.3838	32.4074	43.75	42.3077	28.3019	31.6327	40.3846	33.0275	35.9223	24	33.6842
6.14	2.23735	0.929512	2.55134	2.37352	1.63502	3.00395	3.28988	3.38078	3.25991	3.50467	3.98833	3.83858	1.8797	4.38144	4.84234	4.78395	2.06948	2.1777	3.0303	2.35823	1.40114	2.86113	2.80822	1.84615	1.99115	2.04866	2.94985	1.97228	2.47376	2.74368	3.88959	4.40613	3.96301	4.64625	5.34188	3.52832	9.41176	35.3535	26.2626	26.8519	25	35.5769	37.7358	34.6939	35.5769	22.9358	27.1845	25	48.4211
6.16	1.26459	1.39427	2.61357	2.12367	2.37342	2.9249	2.48293	4.53737	3.78855	3.27103	4.76654	4.13386	2.75689	3.43643	4.27928	6.32716	2.73466	3.13589	2.15618	2.30208	2.02387	2.51221	4.45205	2.10256	2.04646	2.24072	2.72861	2.23881	3.52324	2.16606	3.51317	4.69349	4.09511	4.11827	5.44872	3.43547	9.17647	37.3737	41.4141	37.963	39.5833	28.8462	32.0755	37.7551	41.3462	30.2752	33.9806	39	43.1579
6.18	1.60506	1.27808	2.36465	1.99875	1.79325	3.39921	2.42086	4.18149	3.17181	3.19315	3.50195	4.33071	2.56892	4.72509	4.95495	5.55556	2.43902	3.39721	2.15618	1.68445	2.23145	2.86113	4.10959	1.79487	1.93584	2.36876	2.87611	1.97228	3.29835	2.45487	5.5207	4.78927	3.83091	3.37909	4.59402	3.71402	8	25.2525	43.4343	37.037	38.5417	34.6154	34.9057	26.5306	27.8846	28.4404	35.9223	38	25.2632
6.2	1.6537	1.39427	1.8046	2.43598	1.95148	3.63636	2.23464	4.27046	3.70044	3.58255	3.89105	3.34646	2.63158	2.83505	4.05405	5.8642	2.58684	2.78746	2.85548	1.6283	2.28334	3.14027	2.60274	1.74359	2.15708	1.85659	2.35988	1.70576	3.82309	2.09386	4.64241	3.83142	3.96301	4.01267	4.48718	3.15692	8	47.4747	37.3737	35.1852	44.7917	29.8077	35.8491	37.7551	28.8462	22.9358	36.8932	38	32.6316
6.22	2.09144	1.16189	2.11574	2.74828	2.05696	2.68775	2.73122	3.73665	4.49339	3.11526	4.86381	4.23228	2.38095	2.83505	5.06757	4.93827	2.21729	3.39721	3.14685	2.07748	1.45304	2.65178	3.76712	1.4359	1.93584	1.98464	2.87611	1.91898	3.37331	2.02166	5.64617	4.02299	4.22721	3.69588	3.63248	2.32126	7.29412	46.4646	40.404	27.7778	50	29.8077	25.4717	23.4694	41.3462	29.3578	36.8932	46	37.8947
6.24	1.70233	1.433	3.3603	3.06059	2.42616	3.47826	2.73122	4.53737	3.34802	3.97196	3.50195	4.82283	2.88221	2.92096	3.49099	4.93827	2.43902	3.48432	2.7972	2.07748	2.23145	2.30286	3.63014	1.84615	1.82522	2.68886	2.28614	1.75906	2.47376	2.67148	4.76788	4.21456	5.54822	3.80148	4.48718	4.27112	8	37.3737	42.4242	33.3333	37.5	38.4615	33.9623	37.7551	22.1154	31.1927	36.8932	35	33.6842
6.26	1.55642	1.20062	2.42688	2.5609	1.47679	2.45059	1.98634	3.64769	3.17181	3.19315	4.28016	4.42913	2.50627	3.78007	3.37838	3.54938	2.58684	4.00697	2.21445	1.90904	1.29735	2.72156	4.24658	2.15385	2.48894	2.43278	2.94985	2.39872	3.07346	2.23827	4.89335	3.73563	5.54822	3.48469	4.38034	3.34262	11.5294	34.3434	41.4141	32.4074	34.375	32.6923	29.2453	29.5918	29.8077	34.8624	34.9515	36	35.7895
6.28	1.79961	1.16189	1.55569	1.93629	2.1097	3.24111	2.17256	4.35943	2.99559	3.8162	4.28016	4.92126	1.81704	3.43643	3.94144	5.40123	2.2912	3.39721	2.5641	2.02134	2.12766	3.62875	2.53425	2.15385	1.93584	2.36876	3.24484	1.91898	3.44828	2.52708	4.76788	4.88506	4.35931	2.95671	4.70085	4.82823	8.94118	42.4242	32.3232	33.3333	39.5833	32.6923	34.9057	34.6939	48.0769	37.6147	38.835	36	37.8947
6.3	1.75097	1.39427	1.8046	2.5609	1.74051	3.00395	2.66915	4.09253	3.61233	3.58255	3.6965	4.52756	2.13033	3.17869	3.15315	5.24691	3.0303	3.57143	1.74825	1.90904	1.7644	2.79135	3.21918	1.53846	1.1615	2.62484	2.50737	1.75906	2.62369	2.23827	5.26976	3.83142	3.56671	3.69588	5.34188	2.87837	7.76471	25.2525	37.3737	23.1481	35.4167	36.5385	42.4528	48.9796	40.3846	28.4404	30.0971	33	35.7895
6.32	1.55642	1.39427	2.73802	2.06121	1.74051	3.16206	2.66915	3.46975	3.34802	3.58255	4.18288	5.31496	3.44612	3.17869	3.82883	5.70988	3.32594	3.39721	2.50583	1.90904	1.86819	1.95394	3.56164	1.33333	2.21239	1.92061	2.43363	1.75906	3.22339	3.03249	4.64241	3.73563	4.35931	4.43506	5.02137	2.59981	7.29412	26.2626	55.5556	27.7778	45.8333	33.6538	37.7358	28.5714	24.0385	29.3578	25.2427	35	31.5789
6.34	2.14008	1.16189	2.42688	2.18613	1.74051	2.84585	2.48293	3.11388	3.61233	2.57009	3.98833	4.62598	2.69424	4.20962	3.94144	7.09877	2.21729	2.78746	2.38928	2.24593	2.59471	2.79135	2.80822	1.69231	2.15708	1.92061	3.31858	2.1322	2.69865	2.67148	3.76412	4.11877	4.88771	3.59029	4.91453	3.71402	5.17647	43.4343	42.4242	34.2593	38.5417	28.8462	28.3019	30.6122	30.7692	23.8532	30.0971	41	27.3684
6.36	1.70233	1.16189	2.05352	2.49844	1.89873	2.6087	1.73805	3.11388	3.70044	1.86916	4.0856	4.13386	2.06767	3.69416	4.16667	6.48148	2.73466	3.13589	1.98135	1.90904	2.07577	2.65178	3.90411	1.89744	2.21239	2.43278	2.21239	2.61194	2.9985	2.81588	6.27353	3.54406	4.22721	3.0623	4.70085	3.24977	9.17647	40.404	27.2727	32.4074	40.625	28.8462	38.6792	38.7755	28.8462	32.1101	31.068	33	36.8421
6.38	2.52918	1.47173	1.99129	1.49906	1.89873	2.21344	2.29671	3.82562	3.61233	3.73832	4.96109	3.24803	2.00501	3.69416	5.63063	4.16667	3.17812	3.74564	2.27273	1.79674	1.97198	2.65178	2.87671	1.74359	1.54867	1.92061	2.94985	2.23881	2.09895	2.88809	4.89335	3.9272	4.75561	3.90707	3.31197	3.71402	8	33.3333	29.2929	37.037	46.875	30.7692	29.2453	34.6939	37.5	29.3578	33.0097	32	25.2632
6.4	1.99416	1.20062	2.36465	2.18613	2.26793	3.00395	2.17256	2.66904	3.17181	3.89408	4.96109	4.23228	2.3183	2.49141	4.27928	5.24691	2.21729	3.65854	2.44755	1.57215	1.45304	2.93091	3.08219	1.74359	1.99115	2.24072	2.72861	1.65245	3.29835	1.87726	4.64241	4.50192	4.22721	4.64625	4.70085	2.41411	9.41176	35.3535	36.3636	37.037	37.5	26.9231	25.4717	29.5918	45.1923	28.4404	31.068	43	34.7368
6.42	1.70233	1.74284	1.92906	2.31106	1.31857	2.9249	2.42086	2.93594	3.43612	1.79128	4.37743	3.44488	2.94486	3.2646	4.39189	4.32099	1.84775	3.83275	2.68065	1.7406	1.24546	2.37264	2.46575	1.94872	1.7146	2.04866	3.46608	2.39872	2.77361	2.96029	4.64241	4.5977	3.56671	2.21753	3.31197	4.27112	5.88235	32.3232	36.3636	29.6296	44.7917	34.6154	41.5094	29.5918	30.7692	30.2752	40.7767	37	46.3158
6.44	1.70233	1.39427	2.17797	1.87383	1.89873	3.16206	2.48293	2.58007	3.61233	2.80374	3.6965	3.93701	2.25564	4.29553	4.84234	5.09259	2.80857	2.61324	2.15618	1.57215	2.07577	2.79135	2.73973	2.10256	1.82522	2.30474	2.21239	1.49254	4.04798	2.45487	3.76412	3.83142	3.69881	3.80148	4.48718	4.64253	7.05882	30.303	27.2727	37.963	38.5417	28.8462	31.1321	41.8367	30.7692	29.3578	37.8641	32	27.3684
6.46	2.48054	1.23935	1.68015	2.37352	2.05696	2.21344	1.92427	3.73665	2.55507	3.89408	2.62646	4.33071	2.00501	3.2646	3.71622	4.62963	2.51293	3.83275	2.44755	1.6283	1.50493	2.16329	3.76712	1.74359	1.38274	2.04866	2.21239	1.65245	3.29835	3.3213	3.76412	4.21456	5.28402	3.48469	3.73932	2.78552	10.1176	34.3434	30.303	36.1111	43.75	26.9231	27.3585	32.6531	30.7692	27.5229	34.9515	37	26.3158
6.48	1.70233	2.05267	1.99129	2.06121	2.05696	3.083	2.91744	2.93594	2.90749	3.89408	3.11284	3.14961	1.94236	3.86598	3.6036	5.24691	2.43902	2.70035	2.44755	2.07748	1.50493	2.86113	3.21918	1.33333	1.76991	2.62484	2.43363	2.07889	2.47376	2.31047	3.26223	4.02299	4.22721	3.69588	4.38034	3.62117	9.41176	31.3131	37.3737	40.7407	36.4583	43.2692	36.7925	28.5714	41.3462	22.9358	30.0971	43	33.6842
6.5	1.79961	1.89775	2.17797	2.06121	1.95148	3.32016	2.11049	3.64769	3.43612	3.27103	3.01556	3.34646	2.3183	4.38144	3.49099	5.09259	2.21729	3.223	2.15618	1.90904	1.40114	1.88416	3.56164	1.02564	1.93584	2.04866	2.43363	2.07889	2.9985	2.81588	3.76412	4.02299	2.90621	3.48469	4.05983	3.52832	4.94118	38.3838	38.3838	28.7037	31.25	35.5769	24.5283	35.7143	28.8462	23.8532	33.0097	18	22.1053
6.52	1.45914	1.16189	2.30243	2.18613	1.68776	2.68775	2.7933	3.82562	3.34802	2.49221	3.50195	3.34646	2.44361	3.2646	4.84234	7.09877	2.21729	3.223	2.0979	1.45985	2.75039	1.74459	3.35616	1.94872	1.99115	2.75288	1.84366	2.1322	2.92354	2.59928	3.76412	3.83142	3.43461	4.11827	3.31197	3.89972	7.52941	16.1616	35.3535	25.9259	29.1667	32.6923	34.9057	33.6735	21.1538	22.0183	32.0388	37	37.8947
6.54	1.79961	1.31681	1.99129	2.12367	1.63502	2.6087	1.98634	3.02491	3.78855	3.97196	4.37743	3.24803	2.81955	3.52234	3.26577	4.16667	1.77384	3.65854	2.21445	1.29141	1.60872	2.16329	2.46575	2	2.04646	2.04866	2.35988	2.29211	2.69865	2.88809	4.14053	2.96935	2.77411	3.80148	4.91453	3.15692	6.35294	26.2626	35.3535	27.7778	32.2917	38.4615	34.9057	36.7347	26.9231	30.2752	35.9223	36	28.4211
6.56	2.52918	1.47173	2.11574	1.56152	1.74051	2.05534	2.42086	3.11388	3.0837	2.64798	3.50195	4.23228	2.69424	3.86598	4.16667	4.78395	2.58684	3.13589	2.15618	2.02134	1.60872	2.51221	3.35616	1.94872	1.99115	2.88092	2.28614	2.23881	2.24888	2.88809	4.51694	3.2567	3.56671	4.32946	3.4188	3.89972	10.3529	29.2929	36.3636	24.0741	28.125	25.9615	30.1887	25.5102	35.5769	25.6881	30.0971	41	38.9474
6.58	1.70233	1.39427	1.49347	2.12367	1.31857	2.9249	2.35878	3.20285	2.99559	2.9595	3.98833	4.13386	2.38095	3.2646	3.94144	3.08642	3.0303	3.04878	2.5641	1.85289	1.97198	2.86113	2.87671	2.10256	1.65929	3.07298	2.94985	2.02559	2.69865	2.88809	5.14429	4.78927	4.35931	3.59029	4.70085	3.62117	8.94118	29.2929	43.4343	31.4815	40.625	41.3462	36.7925	32.6531	32.6923	27.5229	29.1262	34	20
6.6	1.99416	1.97521	2.2402	1.87383	1.63502	2.7668	2.73122	4.09253	2.73128	3.34891	4.37743	4.42913	2.44361	3.17869	4.5045	6.48148	2.95639	3.04878	1.80653	1.68445	1.45304	2.30286	2.32877	2.10256	1.82522	2.1767	2.94985	1.81237	2.62369	2.45487	3.13676	3.63985	4.75561	4.01267	3.73932	2.69266	7.76471	42.4242	38.3838	33.3333	38.5417	36.5385	31.1321	28.5714	31.7308	29.3578	25.2427	32	27.3684
6.62	1.94553	1.58792	2.55134	1.68645	1.21308	1.89723	2.60708	3.02491	2.64317	2.88162	3.11284	3.93701	2.00501	3.78007	4.95495	5.55556	2.66075	3.57143	2.15618	1.79674	1.45304	3.21005	2.67123	2.41026	1.49336	1.79257	2.28614	1.38593	1.94903	2.88809	4.89335	3.63985	3.17041	3.59029	3.20513	3.34262	8.70588	28.2828	41.4141	26.8519	39.5833	35.5769	34.9057	36.7347	29.8077	31.1927	26.2136	29	18.9474
6.64	1.75097	1.433	2.30243	1.62399	1.63502	2.52964	2.60708	2.4911	3.25991	2.64798	3.11284	2.65748	2.06767	3.69416	3.37838	3.7037	2.2912	3.48432	2.21445	2.18978	2.12766	3.0007	3.21918	2.30769	1.88053	2.30474	3.31858	1.54584	3.44828	2.45487	5.01882	3.54406	4.35931	4.11827	3.73932	4.45682	7.76471	34.3434	41.4141	25	45.8333	26.9231	31.1321	32.6531	31.7308	19.2661	38.835	35	25.2632
6.66	1.70233	1.39427	2.36465	2.06121	1.79325	2.45059	2.23464	3.02491	3.43612	3.50467	3.6965	3.83858	2.94486	3.00687	3.15315	5.09259	2.14339	3.3101	2.50583	1.516	1.66061	2.65178	3.35616	2	2.15708	1.98464	3.09735	2.1855	2.3988	2.16606	3.76412	3.63985	4.75561	4.43506	4.2735	3.62117	9.41176	36.3636	41.4141	32.4074	35.4167	26.9231	40.566	36.7347	34.6154	26.6055	23.301	25	28.4211
6.68	1.55642	1.20062	2.36465	2.81074	2.42616	3.083	1.73805	2.4911	4.22907	2.18069	3.30739	3.14961	2.56892	2.83505	4.27928	5.8642	2.80857	2.78746	2.50583	1.6283	1.45304	1.67481	3.76712	1.79487	1.1615	2.43278	2.80236	1.86567	2.09895	2.52708	4.39147	4.02299	4.49141	3.0623	4.48718	3.24977	7.29412	32.3232	36.3636	23.1481	37.5	26.9231	33.0189	31.6327	27.8846	34.8624	34.9515	37	23.1579
6.7	2.18872	1.27808	1.86683	1.74891	1.26582	2.9249	1.55183	3.82562	3.43612	2.25857	3.89105	3.34646	2.19298	3.17869	3.82883	4.32099	2.2912	3.04878	1.80653	1.40371	1.34925	2.23308	2.80822	1.69231	1.54867	1.66453	2.58112	1.59915	3.67316	2.23827	4.89335	4.02299	2.90621	3.48469	3.52564	2.87837	8.70588	28.2828	35.3535	25.9259	28.125	34.6154	26.4151	25.5102	34.6154	27.5229	28.1553	28	36.8421
6.72	1.89689	1.39427	2.48911	3.18551	1.52954	2.68775	1.6139	4.00356	3.25991	2.80374	3.50195	3.34646	2.00501	2.92096	2.7027	4.32099	2.21729	2.52613	1.57343	1.79674	2.07577	2.65178	2.60274	2.05128	2.21239	2.1767	2.87611	1.91898	2.47376	2.96029	5.26976	4.21456	3.96301	3.69588	3.73932	3.24977	9.41176	35.3535	37.3737	31.4815	41.6667	29.8077	28.3019	30.6122	31.7308	26.6055	32.0388	25	25.2632
6.74	1.84825	0.929512	2.36465	2.62336	1.89873	3.16206	2.73122	2.75801	3.17181	3.42679	2.91829	3.14961	2.06767	4.38144	3.82883	4.47531	2.2912	3.13589	2.27273	1.6283	1.55682	2.16329	2.46575	1.79487	2.10177	2.11268	2.43363	2.23881	2.24888	1.94946	4.64241	4.31034	2.90621	4.01267	4.2735	3.99257	5.64706	25.2525	34.3434	37.037	38.5417	37.5	25.4717	36.7347	39.4231	15.5963	32.0388	41	28.4211
6.76	2.0428	1.00697	2.2402	2.43598	2.05696	3.39921	1.80012	2.93594	2.73128	2.33645	3.50195	2.3622	1.8797	2.92096	4.84234	3.7037	2.21729	3.223	2.03963	1.45985	1.71251	2.37264	3.15068	2.15385	1.76991	1.79257	2.58112	2.1855	3.37331	3.10469	4.89335	4.02299	3.69881	4.11827	4.91453	3.24977	9.41176	30.303	34.3434	33.3333	34.375	39.4231	31.1321	30.6122	26.9231	28.4404	33.0097	31	35.7895
6.78	1.6537	1.433	2.30243	2.18613	1.74051	2.7668	1.98634	3.46975	2.73128	2.88162	4.96109	3.05118	1.75439	3.78007	4.39189	4.78395	3.39985	2.87456	2.15618	1.68445	1.19357	2.51221	3.35616	1.79487	1.49336	2.1767	2.58112	1.91898	3.52324	2.38267	5.14429	4.11877	3.69881	4.43506	4.05983	3.24977	8	30.303	38.3838	29.6296	40.625	28.8462	32.0755	39.7959	30.7692	24.7706	28.1553	27	29.4737
6.8	2.62646	1.433	2.48911	2.68582	1.79325	3.00395	2.17256	3.73665	3.96476	3.58255	3.30739	3.34646	2.63158	3.43643	3.71622	4.47531	2.21729	2.87456	2.15618	1.85289	1.34925	2.65178	3.15068	1.74359	1.21681	2.04866	2.94985	1.70576	3.22339	2.23827	4.14053	4.5977	5.41612	3.69588	3.20513	3.15692	7.05882	23.2323	38.3838	28.7037	36.4583	25.9615	33.0189	28.5714	29.8077	23.8532	33.0097	33	34.7368
6.82	1.75097	1.31681	2.11574	2.06121	1.84599	2.13439	1.80012	3.38078	2.55507	2.9595	3.79377	3.74016	2.56892	4.29553	4.16667	3.85802	2.51293	2.78746	2.03963	1.90904	1.81629	2.93091	2.87671	1.74359	1.60398	2.75288	2.87611	1.38593	2.24888	2.23827	3.88959	3.83142	4.75561	3.59029	4.80769	3.15692	8.47059	24.2424	32.3232	31.4815	25	21.1538	26.4151	35.7143	35.5769	22.9358	37.8641	28	37.8947
6.84	1.26459	1.51046	2.17797	2.37352	1.89873	3.00395	2.35878	3.64769	2.99559	3.03738	3.50195	3.93701	2.69424	3.60825	2.92793	6.01852	2.95639	2.87456	2.331	1.34756	1.86819	2.93091	2.26027	1.74359	1.99115	2.04866	2.72861	2.07889	1.72414	1.73285	3.3877	2.49042	4.49141	3.69588	3.52564	3.52832	7.29412	28.2828	31.3131	33.3333	34.375	25.9615	23.5849	29.5918	26.9231	22.9358	26.2136	29	25.2632
6.86	1.26459	1.12316	1.99129	1.74891	1.89873	3.00395	2.66915	3.55872	3.78855	3.50467	4.28016	4.23228	1.4411	3.09278	3.6036	5.40123	2.51293	2.00348	2.0979	1.68445	1.97198	2.44243	3.21918	1.4359	1.99115	1.66453	3.24484	1.86567	2.69865	2.02166	4.01506	4.21456	5.94452	2.63992	3.31197	2.87837	7.52941	31.3131	29.2929	29.6296	27.0833	24.0385	27.3585	35.7143	31.7308	35.7798	27.1845	22	29.4737
6.88	1.6537	1.08443	2.11574	2.8732	1.79325	2.45059	2.42086	2.58007	4.14097	3.34891	3.11284	3.64173	2.25564	3.52234	3.04054	4.78395	2.73466	3.39721	1.80653	1.68445	1.81629	1.95394	3.76712	1.53846	1.05088	1.92061	3.39233	1.97228	3.22339	2.59928	3.51317	2.77778	3.83091	4.11827	3.95299	3.43547	4.94118	22.2222	36.3636	35.1852	31.25	20.1923	30.1887	28.5714	27.8846	24.7706	29.1262	29	35.7895
6.9	1.75097	1.70411	1.74238	1.81137	2.16245	3.24111	1.92427	2.84698	3.96476	2.80374	3.50195	3.83858	2.50627	3.17869	3.94144	5.70988	2.80857	3.57143	1.6317	1.79674	2.49092	2.16329	3.28767	2.15385	1.7146	1.85659	2.58112	1.81237	3.37331	2.38267	2.50941	3.06513	2.77411	3.0623	3.73932	3.99257	6.82353	39.3939	26.2626	33.3333	43.75	25	35.8491	28.5714	30.7692	22.9358	28.1553	38	30.5263
6.92	1.55642	1.08443	1.74238	2.74828	1.58228	2.45059	2.23464	3.29181	4.31718	2.1028	4.47471	2.3622	2.3183	3.86598	4.39189	4.78395	2.21729	2.78746	1.6317	1.7406	1.55682	2.86113	2.94521	1.4359	1.82522	2.43278	2.28614	2.02559	2.9985	1.80505	3.63864	3.63985	3.43461	3.69588	3.52564	3.80687	9.17647	26.2626	33.3333	38.8889	31.25	16.3462	24.5283	40.8163	32.6923	22.9358	38.835	21	21.0526
6.94	1.94553	0.735864	1.8046	2.49844	1.63502	2.68775	1.8622	3.82562	2.90749	3.03738	4.18288	3.74016	2.19298	3.2646	3.6036	6.48148	2.73466	2.26481	2.21445	1.79674	1.19357	2.16329	2.80822	1.84615	2.21239	2.56082	2.87611	2.23881	3.44828	2.02166	4.51694	2.39464	4.75561	3.48469	3.4188	3.52832	7.76471	25.2525	30.303	29.6296	40.625	31.7308	16.9811	36.7347	30.7692	29.3578	34.9515	23	32.6316
6.96	1.75097	1.08443	1.43124	2.8732	2.32068	2.9249	1.80012	3.38078	2.37885	2.88162	4.66926	4.23228	2.19298	3.17869	4.39189	5.24691	2.21729	2.87456	2.50583	1.34756	2.02387	2.02373	2.94521	1.4359	1.7146	1.98464	2.35988	1.91898	3.67316	3.03249	3.76412	4.40613	3.83091	4.96304	4.38034	2.59981	8.23529	39.3939	36.3636	18.5185	34.375	26.9231	28.3019	25.5102	26.9231	20.1835	25.2427	31	27.3684
6.98	1.0214	1.27808	2.17797	2.43598	1.89873	2.45059	1.92427	3.46975	2.90749	3.27103	2.43191	4.33071	1.81704	3.78007	3.82883	4.78395	2.88248	2.1777	1.8648	1.90904	1.45304	2.44243	3.0137	1.94872	0.829646	2.1767	2.65487	1.86567	2.54873	1.94946	3.88959	3.44828	3.30251	3.2735	3.20513	3.99257	8.23529	29.2929	29.2929	32.4074	34.375	31.7308	30.1887	22.449	30.7692	21.1009	24.2718	30	36.8421
7	1.70233	1.39427	1.99129	2.12367	1.89873	3.63636	2.60708	3.55872	3.0837	2.80374	2.91829	3.93701	2.50627	3.09278	2.36486	4.32099	2.51293	4.18118	2.5641	2.18978	1.40114	2.65178	3.69863	2	1.7146	2.24072	2.0649	2.66525	2.3988	2.74368	3.88959	2.49042	4.09511	2.85111	4.2735	3.89972	9.64706	33.3333	35.3535	26.8519	46.875	25.9615	31.1321	21.4286	37.5	20.1835	33.0097	33	30.5263
7.02	1.79961	1.00697	1.8046	2.24859	1.52954	3.24111	1.92427	2.58007	3.0837	2.57009	3.11284	2.85433	1.62907	3.95189	3.82883	5.40123	2.73466	3.39721	1.92308	1.6283	1.81629	2.37264	3.0137	2.10256	1.54867	3.07298	2.50737	2.02559	2.47376	1.94946	4.39147	3.83142	3.96301	3.69588	3.73932	4.36397	8	36.3636	32.3232	29.6296	42.7083	25.9615	23.5849	28.5714	28.8462	22.9358	30.0971	24	33.6842
7.04	1.07004	1.16189	1.8046	2.12367	1.47679	2.68775	2.23464	3.11388	2.99559	2.80374	3.50195	4.13386	2.19298	3.17869	2.92793	5.40123	2.88248	2.96167	1.68998	1.85289	2.07577	1.88416	3.21918	1.38462	1.43805	1.79257	2.50737	1.33262	2.69865	2.88809	3.63864	3.73563	3.56671	2.85111	4.48718	3.80687	8	28.2828	35.3535	26.8519	26.0417	18.2692	31.1321	27.551	35.5769	23.8532	26.2136	35	24.2105
7.06	1.70233	1.12316	1.74238	1.99875	1.52954	2.21344	1.80012	3.20285	2.99559	2.9595	3.01556	3.74016	2.19298	3.09278	2.59009	5.24691	2.21729	2.00348	1.8648	2.41437	1.71251	2.37264	2.53425	1.48718	1.54867	1.15237	2.50737	1.38593	2.69865	1.73285	4.39147	3.16092	4.35931	3.80148	3.84615	3.24977	6.82353	34.3434	32.3232	37.963	26.0417	27.8846	30.1887	37.7551	28.8462	22.9358	28.1553	23	20
7.08	1.50778	1.27808	1.24456	1.93629	1.58228	2.52964	1.73805	2.84698	3.43612	3.11526	3.21012	3.24803	1.75439	2.31959	4.16667	5.24691	1.62602	2.26481	3.0303	1.90904	1.14167	2.86113	2.53425	1.79487	1.76991	2.04866	2.43363	1.91898	2.32384	2.96029	4.266	2.58621	2.77411	2.11193	3.52564	3.80687	5.41176	36.3636	29.2929	28.7037	31.25	32.6923	25.4717	37.7551	32.6923	27.5229	24.2718	30	32.6316
7.1	1.45914	1.27808	1.86683	2.24859	1.95148	1.73913	2.11049	4.4484	2.55507	2.80374	4.0856	3.74016	2.06767	3.17869	3.82883	3.54938	2.66075	3.04878	1.8648	1.96519	1.34925	2.23308	1.91781	1.58974	1.93584	1.85659	2.35988	1.70576	3.44828	2.38267	3.88959	2.58621	3.03831	3.59029	4.48718	3.24977	7.29412	33.3333	24.2424	25.9259	32.2917	17.3077	33.9623	28.5714	40.3846	27.5229	38.835	38	31.5789
7.12	1.99416	0.929512	2.17797	1.68645	1.42405	2.84585	2.60708	3.38078	2.99559	1.79128	3.30739	4.13386	1.69173	3.2646	3.04054	3.08642	2.21729	2.61324	1.6317	2.47052	1.66061	2.44243	2.60274	1.64103	2.37832	2.30474	2.87611	1.97228	2.77361	2.31047	5.89711	3.2567	4.75561	3.2735	3.4188	3.89972	6.11765	32.3232	36.3636	22.2222	31.25	28.8462	29.2453	29.5918	37.5	27.5229	26.2136	28	31.5789
7.14	1.79961	1.08443	1.61792	2.24859	1.26582	2.29249	2.29671	3.82562	3.43612	2.41433	3.21012	4.03543	2.44361	2.49141	4.27928	4.93827	2.14339	3.13589	2.73893	1.90904	1.34925	1.74459	2.60274	1.58974	1.60398	2.04866	3.0236	1.38593	2.09895	2.23827	4.89335	4.31034	5.01982	2.85111	3.63248	3.15692	8.94118	36.3636	33.3333	27.7778	36.4583	26.9231	24.5283	26.5306	20.1923	31.1927	29.1262	30	25.2632
7.16	1.45914	1.12316	2.86248	1.81137	1.68776	3.00395	2.73122	3.91459	2.64317	2.25857	3.30739	4.23228	1.81704	3.35052	2.92793	4.16667	1.77384	2.52613	1.98135	1.34756	1.24546	1.81438	2.26027	1.74359	1.7146	2.1767	3.39233	1.65245	2.77361	3.10469	4.01506	3.06513	3.96301	3.48469	4.05983	3.24977	6.82353	23.2323	38.3838	32.4074	23.9583	30.7692	34.9057	24.4898	27.8846	33.945	22.3301	21	32.6316
7.18	2.09144	1.12316	1.86683	2.12367	1.58228	2.29249	1.92427	3.55872	2.29075	2.33645	4.96109	4.82283	1.75439	2.74914	3.04054	6.17284	2.36511	2.09059	1.45688	1.516	1.45304	2.02373	3.83562	1.4359	1.54867	1.92061	2.80236	2.07889	2.84858	2.09386	3.13676	3.73563	3.56671	4.11827	4.05983	2.78552	8	27.2727	39.3939	22.2222	31.25	22.1154	32.0755	23.4694	21.1538	23.8532	34.9515	28	25.2632
7.2	2.18872	1.89775	2.05352	2.5609	1.63502	2.84585	2.04842	3.64769	3.0837	1.86916	3.30739	3.14961	2.19298	3.09278	3.15315	4.47531	2.66075	3.04878	2.0979	1.6283	2.38713	2.16329	2.94521	1.53846	1.65929	1.92061	2.21239	1.59915	2.54873	2.09386	3.51317	4.78927	4.09511	3.69588	3.95299	3.15692	8.23529	29.2929	39.3939	33.3333	30.2083	26.9231	29.2453	34.6939	42.3077	25.6881	28.1553	31	37.8947
7.22	1.99416	1.35554	2.05352	1.37414	1.26582	2.6087	2.11049	2.31317	2.55507	2.9595	2.52918	4.42913	1.8797	2.66323	4.05405	4.01235	2.73466	2.87456	1.8648	1.85289	1.55682	1.53524	3.21918	1.58974	1.32743	2.43278	1.9174	2.55864	3.22339	2.23827	3.3877	4.02299	3.43461	3.37909	3.63248	2.78552	5.64706	28.2828	36.3636	27.7778	42.7083	29.8077	18.8679	27.551	21.1538	20.1835	34.9515	35	25.2632
7.24	1.36187	0.929512	2.55134	2.24859	1.95148	2.37154	1.55183	3.20285	3.52423	3.03738	3.01556	3.93701	3.00752	3.52234	4.61712	5.09259	2.80857	2.52613	1.6317	1.516	1.50493	2.86113	2.94521	1.79487	1.32743	2.24072	2.43363	2.02559	3.74813	1.44404	3.3877	2.01149	3.69881	2.32313	3.73932	2.41411	7.29412	20.202	19.1919	28.7037	43.75	28.8462	28.3019	30.6122	34.6154	30.2752	18.4466	31	20
7.26	1.60506	0.852053	1.74238	1.93629	1.52954	2.6087	1.98634	3.73665	2.11454	3.34891	3.40467	2.3622	1.50376	2.06186	2.02703	3.85802	2.73466	3.74564	1.45688	1.68445	1.55682	3.07048	2.94521	1.74359	2.43363	1.53649	3.17109	1.97228	2.32384	2.96029	4.01506	3.63985	3.83091	4.54065	4.05983	3.34262	8.23529	23.2323	25.2525	33.3333	39.5833	17.3077	20.7547	40.8163	27.8846	22.0183	35.9223	21	18.9474
7.28	1.50778	1.35554	2.9247	2.06121	1.74051	2.37154	2.04842	2.84698	2.46696	2.41433	3.59922	2.65748	2.19298	1.89003	2.81532	4.01235	2.21729	2.87456	1.80653	1.79674	1.55682	2.37264	3.08219	1.48718	1.99115	1.53649	1.76991	1.65245	2.69865	2.67148	4.64241	3.35249	4.35931	4.01267	6.83761	3.89972	5.88235	33.3333	36.3636	27.7778	32.2917	28.8462	23.5849	32.6531	23.0769	25.6881	30.0971	32	23.1579
7.3	1.6537	1.23935	1.74238	2.06121	1.42405	2.37154	2.23464	2.84698	2.46696	2.9595	3.40467	3.24803	2.38095	2.49141	4.39189	4.93827	3.17812	3.57143	1.68998	1.516	1.66061	1.95394	2.53425	1.79487	1.7146	2.24072	2.35988	1.59915	2.77361	1.87726	4.266	3.35249	4.35931	3.59029	3.09829	2.78552	6.11765	37.3737	32.3232	29.6296	32.2917	27.8846	28.3019	28.5714	30.7692	21.1009	21.3592	23	29.4737
7.32	1.60506	1.35554	2.11574	2.62336	2.21519	2.68775	2.29671	3.29181	3.52423	2.25857	3.50195	5.11811	1.69173	3.2646	3.15315	5.24691	2.21729	2.61324	2.5641	1.90904	2.02387	2.44243	2.94521	1.38462	1.65929	2.4968	2.0649	2.02559	2.84858	2.45487	4.266	3.63985	4.09511	3.69588	3.63248	3.24977	8.70588	27.2727	28.2828	24.0741	37.5	37.5	23.5849	29.5918	29.8077	19.2661	20.3883	37	27.3684
7.34	1.89689	1.00697	1.99129	2.18613	1.21308	2.68775	2.35878	3.46975	2.37885	2.72586	3.79377	3.93701	2.63158	3.17869	3.15315	3.7037	2.88248	3.48432	2.15618	2.07748	1.60872	2.72156	3.08219	1.79487	1.60398	1.53649	1.84366	1.27932	2.84858	2.38267	4.01506	4.31034	4.49141	4.54065	5.02137	3.24977	6.35294	34.3434	38.3838	25.9259	50	24.0385	24.5283	26.5306	41.3462	19.2661	26.2136	19	29.4737
7.36	1.11868	1.20062	2.11574	2.37352	1.37131	1.97628	1.92427	2.58007	2.37885	3.03738	2.62646	4.62598	2.06767	3.43643	3.71622	4.32099	2.06948	3.39721	2.03963	1.96519	1.55682	1.74459	2.12329	0.974359	1.82522	1.92061	2.13864	1.33262	2.32384	1.87726	2.63488	3.44828	3.17041	3.59029	3.4188	2.59981	4.70588	30.303	33.3333	41.6667	28.125	25	27.3585	33.6735	25	22.0183	28.1553	32	36.8421
7.38	1.6537	1.39427	1.43124	1.18676	1.68776	3.083	2.60708	3.20285	3.0837	2.41433	3.59922	4.13386	1.69173	2.74914	3.6036	4.62963	1.84775	3.39721	1.6317	1.6283	1.71251	1.95394	2.94521	1.48718	1.38274	1.92061	2.43363	1.97228	3.07346	2.52708	4.14053	2.58621	2.77411	3.0623	5.02137	2.13556	4.94118	38.3838	23.2323	31.4815	35.4167	37.5	28.3019	24.4898	32.6923	28.4404	39.8058	29	33.6842
7.4	2.09144	1.35554	1.49347	1.4366	1.37131	2.13439	2.97952	4.00356	2.81938	3.03738	3.11284	2.75591	1.69173	3.43643	3.71622	3.7037	2.66075	2.35192	1.98135	1.57215	1.97198	2.44243	2.26027	1.89744	1.99115	1.66453	2.87611	1.59915	2.62369	1.87726	3.3877	2.58621	3.96301	2.11193	4.48718	4.54968	6.82353	21.2121	26.2626	22.2222	44.7917	19.2308	27.3585	28.5714	33.6538	26.6055	30.0971	27	24.2105
7.42	2.28599	1.27808	1.8046	2.12367	1.89873	2.37154	2.29671	3.02491	2.64317	2.80374	3.6965	3.54331	2.44361	2.49141	3.15315	4.32099	1.99557	2.43902	1.57343	1.516	1.24546	2.16329	2.67123	1.84615	1.88053	1.28041	2.50737	2.39872	2.69865	1.80505	4.14053	3.06513	3.17041	3.0623	4.2735	3.89972	5.64706	26.2626	26.2626	31.4815	34.375	26.9231	16.9811	25.5102	22.1154	21.1009	24.2718	22	23.1579
7.44	1.31323	1.20062	1.49347	1.81137	2.63713	2.52964	1.92427	2.13523	3.78855	2.72586	2.82101	2.65748	1.8797	3.00687	3.82883	4.16667	1.84775	2.61324	1.74825	1.68445	1.86819	1.88416	2.39726	1.4359	1.54867	2.04866	2.72861	1.81237	3.07346	1.94946	3.76412	3.35249	3.43461	2.74551	3.20513	3.06407	5.17647	36.3636	30.303	23.1481	38.5417	26.9231	31.1321	29.5918	23.0769	18.3486	16.5049	31	26.3158
7.46	1.99416	1.00697	1.92906	1.81137	1.79325	2.6087	1.6139	3.55872	3.17181	3.66044	4.28016	2.85433	2.3183	2.66323	3.71622	3.08642	2.14339	1.91638	1.68998	1.34756	1.50493	2.23308	2.87671	1.07692	1.38274	2.24072	2.87611	2.07889	2.77361	1.80505	3.3877	3.83142	3.96301	3.80148	3.52564	3.06407	7.29412	27.2727	37.3737	25	29.1667	30.7692	28.3019	20.4082	31.7308	31.1927	20.3883	19	32.6316
7.48	1.50778	1.433	1.61792	2.06121	1.52954	2.84585	1.98634	2.75801	2.37885	2.88162	3.11284	3.74016	2.06767	3.09278	2.81532	5.8642	2.80857	2.52613	2.27273	1.96519	1.92008	1.60502	3.28767	1.58974	1.76991	1.98464	2.87611	2.1322	2.62369	2.88809	2.88582	2.96935	2.90621	4.43506	4.05983	3.34262	8.23529	25.2525	30.303	25	30.2083	22.1154	32.0755	28.5714	31.7308	19.2661	29.1262	31	26.3158
7.5	1.6537	0.813323	1.86683	1.93629	1.42405	2.45059	2.11049	2.93594	3.61233	2.41433	2.23735	1.9685	2.3183	2.83505	2.81532	5.24691	1.99557	2.78746	2.0979	1.40371	1.7644	1.46546	2.80822	2.05128	1.93584	2.11268	2.87611	1.38593	2.62369	2.23827	3.88959	2.87356	4.09511	2.85111	2.99145	3.71402	7.29412	26.2626	27.2727	30.5556	32.2917	24.0385	20.7547	29.5918	29.8077	22.0183	20.3883	23	25.2632
7.52	1.41051	0.929512	2.05352	1.93629	1.21308	3.00395	2.66915	3.64769	2.81938	2.49221	4.28016	4.23228	2.44361	1.97595	3.04054	5.8642	2.2912	3.13589	2.03963	2.07748	1.24546	2.02373	3.0137	1.23077	1.88053	1.98464	2.72861	2.02559	3.22339	2.31047	3.88959	3.63985	3.83091	3.90707	2.45726	3.34262	8.47059	19.1919	36.3636	29.6296	37.5	30.7692	23.5849	29.5918	24.0385	17.4312	31.068	32	34.7368
7.54	1.6537	1.47173	1.86683	2.12367	2.05696	2.45059	1.98634	3.38078	2.99559	3.42679	3.01556	2.3622	2.56892	2.49141	3.82883	5.55556	2.43902	2.70035	1.51515	2.35823	1.71251	2.16329	2.32877	1.4359	1.43805	1.79257	1.9174	1.65245	2.32384	2.38267	3.63864	3.35249	3.96301	2.95671	4.05983	2.04271	6.82353	31.3131	20.202	35.1852	25	24.0385	28.3019	23.4694	24.0385	22.0183	26.2136	35	24.2105
7.56	1.89689	1.08443	2.17797	1.99875	1.21308	4.03162	1.92427	2.93594	3.43612	2.25857	2.43191	3.44488	2.81955	2.06186	2.92793	3.7037	2.36511	2.26481	2.03963	1.7406	1.34925	2.51221	3.69863	1.84615	1.54867	1.60051	2.80236	1.33262	2.9985	2.59928	4.76788	2.10728	2.37781	3.37909	3.4188	3.43547	6.58824	24.2424	30.303	27.7778	36.4583	32.6923	27.3585	21.4286	25.9615	28.4404	29.1262	34	23.1579
7.58	1.79961	1.20062	1.68015	2.24859	2.21519	2.68775	1.30354	3.38078	2.55507	2.9595	3.30739	3.83858	2.19298	3.43643	3.6036	3.85802	2.14339	2.1777	1.80653	1.90904	1.08978	1.67481	3.15068	1.74359	1.99115	2.56082	2.80236	2.07889	2.17391	2.59928	3.26223	3.06513	5.94452	3.80148	3.84615	3.80687	4	27.2727	18.1818	20.3704	28.125	24.0385	22.6415	24.4898	30.7692	27.5229	20.3883	29	20
7.6	2.14008	0.735864	2.05352	1.81137	1.84599	1.89723	2.11049	3.11388	3.96476	2.41433	2.91829	2.3622	1.69173	2.74914	3.82883	5.24691	2.06948	2.35192	1.74825	1.85289	1.34925	1.74459	3.08219	1.48718	1.49336	2.4968	2.21239	1.54584	2.3988	1.94946	4.76788	4.11877	3.30251	4.11827	3.31197	3.62117	4.47059	23.2323	20.202	18.5185	29.1667	26.9231	25.4717	33.6735	30.7692	21.1009	21.3592	25	21.0526
7.62	1.26459	1.0457	1.55569	2.37352	1.79325	3.083	1.92427	2.84698	2.37885	2.25857	3.21012	2.85433	1.81704	2.74914	2.59009	4.01235	2.43902	2.70035	1.74825	1.68445	1.7644	3.14027	2.46575	1.74359	1.60398	1.92061	2.43363	2.34542	2.54873	1.66065	3.01129	4.11877	3.30251	3.80148	3.95299	3.15692	5.64706	20.202	28.2828	30.5556	34.375	31.7308	27.3585	18.3673	28.8462	25.6881	25.2427	28	28.4211
7.64	2.09144	0.774593	1.74238	2.37352	1.37131	2.9249	1.92427	3.20285	3.0837	3.03738	2.14008	3.24803	2.3183	2.74914	3.26577	3.7037	2.36511	3.57143	1.8648	1.17911	0.934094	2.51221	2.67123	2.25641	1.76991	2.36876	2.28614	2.07889	3.22339	2.52708	4.76788	3.06513	3.83091	3.1679	3.31197	3.24977	6.82353	31.3131	31.3131	27.7778	37.5	19.2308	23.5849	34.6939	25.9615	21.1009	24.2718	22	29.4737
7.66	1.84825	1.00697	1.92906	2.68582	1.63502	2.45059	1.80012	2.66904	3.43612	2.18069	3.30739	4.82283	1.81704	3.09278	2.47748	3.7037	1.55211	2.70035	1.45688	1.516	1.34925	2.30286	2.60274	1.38462	1.88053	1.79257	2.65487	1.86567	2.17391	2.59928	4.14053	3.44828	2.90621	4.43506	3.73932	3.15692	7.52941	16.1616	26.2626	19.4444	45.8333	24.0385	21.6981	23.4694	21.1538	22.9358	31.068	19	24.2105
7.68	1.16732	1.27808	1.74238	2.81074	1.68776	2.68775	2.17256	3.20285	3.96476	2.57009	3.11284	3.34646	2.63158	2.83505	3.26577	3.7037	2.21729	2.70035	2.331	1.6283	1.08978	2.23308	2.39726	1.28205	1.54867	1.98464	2.28614	1.27932	3.44828	2.52708	3.01129	3.35249	3.96301	3.37909	2.67094	2.78552	10.8235	28.2828	32.3232	33.3333	40.625	26.9231	32.0755	23.4694	29.8077	26.6055	18.4466	28	29.4737
7.7	1.50778	1.12316	2.17797	2.12367	1.21308	2.29249	1.98634	2.75801	2.46696	2.9595	3.01556	2.55906	2.44361	3.09278	3.37838	3.7037	3.69549	2.78746	2.331	1.45985	1.55682	3.0007	2.39726	0.820513	1.54867	2.11268	1.76991	2.02559	3.07346	2.45487	3.01129	4.02299	3.96301	3.48469	2.99145	3.34262	5.41176	28.2828	32.3232	21.2963	39.5833	25	23.5849	30.6122	18.2692	26.6055	22.3301	21	29.4737
7.72	1.55642	0.929512	1.49347	1.74891	1.37131	1.89723	1.67598	3.11388	3.61233	2.72586	4.0856	3.74016	2.88221	3.17869	3.49099	4.78395	2.43902	2.61324	1.92308	1.6283	2.02387	2.02373	2.39726	1.28205	1.43805	1.60051	2.72861	1.54584	3.5982	2.45487	3.76412	4.11877	3.69881	3.80148	3.52564	2.32126	6.82353	27.2727	26.2626	25	27.0833	16.3462	28.3019	31.6327	22.1154	19.2661	25.2427	24	23.1579
7.74	1.70233	1.0457	2.05352	2.06121	1.68776	2.21344	1.67598	2.84698	1.93833	2.49221	2.91829	3.44488	1.94236	2.4055	2.92793	3.54938	2.43902	2.43902	2.03963	1.23526	1.34925	2.582	2.53425	1.02564	1.93584	1.92061	2.65487	1.22601	2.3988	2.02166	3.88959	3.54406	2.37781	3.69588	3.52564	3.24977	6.58824	23.2323	32.3232	21.2963	22.9167	22.1154	21.6981	30.6122	31.7308	31.1927	27.1845	25	24.2105
7.76	1.79961	1.0457	1.8046	1.62399	1.63502	2.7668	2.17256	3.46975	2.37885	2.41433	5.35019	2.85433	2.3183	2.74914	2.92793	4.62963	2.66075	2.43902	2.15618	1.34756	1.92008	2.65178	3.0137	1.48718	2.04646	1.40845	2.50737	1.91898	2.24888	2.02166	4.39147	3.16092	3.69881	2.21753	4.2735	2.41411	5.88235	22.2222	35.3535	25	20.8333	22.1154	19.8113	28.5714	28.8462	29.3578	17.4757	31	24.2105
7.78	1.70233	0.968242	2.36465	1.99875	1.05485	2.45059	2.48293	2.66904	2.46696	3.03738	2.62646	3.34646	1.62907	3.78007	2.92793	4.62963	2.14339	2.61324	1.80653	1.45985	1.71251	2.93091	2.80822	1.69231	1.54867	1.66453	1.84366	2.1855	2.62369	3.1769	5.39523	2.58621	3.83091	3.37909	3.73932	3.43547	5.64706	23.2323	30.303	29.6296	33.3333	24.0385	31.1321	23.4694	21.1538	20.1835	26.2136	25	21.0526
7.8	1.45914	1.23935	1.92906	1.74891	1.52954	2.37154	2.35878	3.64769	2.02643	2.33645	2.91829	2.85433	2.88221	2.49141	3.15315	4.16667	1.55211	3.3101	1.74825	1.85289	1.50493	2.02373	3.42466	1.38462	1.65929	2.11268	2.94985	2.1322	2.02399	1.80505	2.25847	3.44828	3.69881	2.95671	3.73932	3.34262	8.23529	19.1919	35.3535	28.7037	29.1667	30.7692	25.4717	33.6735	25	13.7615	33.9806	24	30.5263
7.82	1.75097	0.890782	1.43124	2.18613	1.05485	2.6087	2.04842	2.31317	2.37885	2.33645	2.91829	3.54331	2.00501	2.66323	3.49099	5.55556	2.06948	3.57143	2.50583	1.68445	1.19357	2.72156	3.35616	2	1.54867	1.34443	1.62242	1.59915	2.24888	2.16606	3.63864	2.29885	3.69881	2.21753	3.52564	3.34262	6.58824	30.303	21.2121	27.7778	34.375	26.9231	30.1887	23.4694	25	25.6881	27.1845	30	17.8947
7.84	1.55642	1.51046	2.2402	1.24922	1.16034	2.45059	2.29671	2.4911	4.05286	2.57009	2.91829	4.03543	2.13033	3.17869	3.94144	4.78395	2.51293	2.61324	2.44755	1.90904	1.81629	2.09351	3.9726	1.4359	1.10619	2.36876	1.99115	1.75906	2.62369	1.87726	4.76788	3.35249	2.77411	4.01267	3.63248	3.43547	7.52941	12.1212	29.2929	27.7778	33.3333	23.0769	20.7547	25.5102	24.0385	22.0183	25.2427	26	28.4211
7.86	1.84825	1.47173	1.8046	1.31168	2.58439	2.05534	1.73805	2.84698	3.0837	2.1028	2.82101	2.95276	2.00501	3.35052	4.27928	5.09259	3.17812	3.3101	2.03963	1.516	1.86819	2.23308	2.87671	1.74359	1.7146	1.79257	1.47493	1.38593	2.02399	2.59928	4.14053	3.35249	4.09511	4.01267	2.88462	2.32126	6.82353	19.1919	24.2424	28.7037	29.1667	27.8846	23.5849	20.4082	27.8846	21.1009	21.3592	20	17.8947
7.88	1.31323	1.20062	1.49347	1.74891	1.42405	2.68775	2.11049	3.02491	2.81938	2.57009	3.21012	3.24803	2.06767	2.57732	3.49099	2.77778	1.99557	2.78746	1.68998	2.13363	1.66061	2.09351	2.32877	1.79487	1.88053	1.85659	2.72861	2.1322	2.3988	1.94946	4.64241	3.73563	4.49141	2.42872	3.20513	3.43547	8	25.2525	19.1919	33.3333	35.4167	24.0385	25.4717	25.5102	20.1923	22.0183	15.534	28	26.3158
7.9	1.84825	1.23935	1.68015	2.81074	1.95148	2.68775	1.8622	3.29181	2.64317	2.49221	2.33463	4.42913	1.56642	2.66323	4.05405	5.24691	2.58684	2.78746	1.51515	1.68445	1.34925	2.30286	2.53425	1.17949	0.995575	1.66453	2.72861	2.07889	3.14843	2.45487	3.88959	2.58621	2.50991	3.69588	3.20513	3.34262	7.29412	27.2727	17.1717	31.4815	30.2083	26.9231	33.9623	24.4898	24.0385	20.1835	23.301	20	25.2632
7.92	1.84825	1.0457	2.11574	2.31106	1.42405	2.7668	2.545	3.11388	3.17181	2.41433	2.72374	2.65748	2.00501	2.49141	2.92793	4.78395	2.73466	3.39721	1.51515	2.30208	1.86819	1.67481	3.28767	2.05128	1.65929	1.85659	2.21239	1.97228	2.69865	2.09386	3.76412	2.49042	3.17041	2.32313	3.73932	2.22841	5.41176	38.3838	27.2727	36.1111	26.0417	24.0385	21.6981	28.5714	27.8846	22.9358	16.5049	36	18.9474
7.94	1.70233	0.774593	2.05352	2.31106	1.21308	2.21344	1.67598	2.75801	3.25991	1.7134	2.72374	3.24803	2.50627	2.49141	3.37838	3.85802	2.66075	3.223	1.6317	1.7406	1.34925	2.23308	2.94521	1.53846	1.7146	1.85659	2.65487	1.54584	2.92354	2.45487	2.88582	2.68199	3.17041	2.85111	3.4188	3.80687	9.41176	31.3131	28.2828	24.0741	30.2083	24.0385	15.0943	34.6939	26.9231	24.7706	25.2427	22	27.3684
7.96	1.79961	1.16189	1.8046	2.18613	1.74051	1.66008	1.98634	3.46975	2.64317	2.64798	4.0856	3.05118	1.75439	2.49141	2.81532	3.24074	1.4782	3.223	1.6317	1.17911	1.66061	2.79135	2.87671	1.69231	1.82522	2.36876	2.50737	1.38593	2.17391	1.66065	3.88959	3.54406	4.75561	2.21753	3.09829	2.87837	5.17647	23.2323	36.3636	29.6296	38.5417	28.8462	14.1509	32.6531	23.0769	25.6881	29.1262	32	28.4211
7.98	1.55642	1.23935	2.61357	1.62399	2.00422	2.52964	1.67598	3.20285	3.61233	3.19315	2.72374	3.24803	1.75439	2.49141	1.68919	4.93827	2.66075	3.3101	1.34033	1.7406	1.40114	1.81438	3.15068	1.94872	1.27212	1.92061	3.0236	1.49254	2.69865	1.80505	3.26223	4.02299	3.03831	3.1679	3.09829	2.32126	5.88235	27.2727	25.2525	27.7778	31.25	23.0769	21.6981	32.6531	21.1538	28.4404	19.4175	26	28.4211
8	1.89689	1.08443	1.55569	2.24859	1.74051	2.37154	1.98634	2.2242	2.20264	2.18069	2.43191	2.55906	2.19298	2.14777	3.04054	4.62963	2.51293	2.35192	1.3986	1.6283	1.08978	2.44243	2.67123	1.23077	1.43805	2.36876	2.35988	1.17271	3.52324	2.09386	3.51317	2.77778	3.83091	2.74551	2.77778	2.69266	4.47059	30.303	23.2323	25.9259	34.375	29.8077	30.1887	28.5714	14.4231	22.9358	26.2136	28	26.3158
8.02	1.75097	1.20062	1.99129	1.87383	1.79325	2.05534	1.80012	3.91459	2.29075	2.18069	2.62646	3.54331	2.75689	2.57732	2.81532	5.40123	2.14339	2.00348	2.44755	1.85289	2.07577	2.02373	3.08219	1.23077	1.93584	2.04866	2.13864	1.43923	3.07346	1.87726	4.89335	3.35249	3.43461	3.2735	3.95299	3.71402	4.23529	36.3636	26.2626	23.1481	31.25	31.7308	33.0189	18.3673	18.2692	22.0183	17.4757	22	33.6842
8.04	1.89689	1.16189	1.74238	1.93629	1.37131	2.45059	2.29671	2.31317	2.64317	2.80374	2.91829	3.05118	2.63158	2.74914	3.04054	5.24691	2.14339	2.70035	1.68998	1.68445	1.24546	2.16329	2.73973	1.53846	1.60398	1.53649	2.65487	1.59915	2.3988	2.23827	5.14429	2.96935	3.03831	3.1679	3.73932	2.50696	8.47059	16.1616	33.3333	29.6296	25	19.2308	28.3019	21.4286	24.0385	19.2661	31.068	24	27.3684
8.06	1.99416	1.08443	1.86683	2.18613	1.42405	2.6087	1.8622	3.55872	3.25991	2.33645	2.72374	3.64173	1.94236	2.92096	3.15315	4.01235	1.40429	3.13589	1.51515	1.29141	1.45304	2.37264	3.21918	1.33333	1.7146	1.60051	2.94985	1.1194	2.84858	2.38267	3.76412	3.2567	4.88771	3.0623	3.20513	3.80687	6.82353	27.2727	24.2424	19.4444	30.2083	28.8462	28.3019	29.5918	23.0769	21.1009	18.4466	26	33.6842
8.08	1.94553	1.23935	1.55569	1.99875	1.95148	2.13439	2.23464	2.2242	3.0837	2.25857	3.59922	3.83858	2.19298	3.09278	3.37838	4.32099	2.51293	2.43902	2.27273	1.57215	1.45304	1.67481	3.08219	1.74359	1.7146	1.92061	1.84366	1.49254	2.54873	2.67148	3.88959	3.83142	3.17041	3.1679	3.52564	2.59981	9.17647	34.3434	24.2424	28.7037	26.0417	26.9231	18.8679	24.4898	26.9231	27.5229	21.3592	32	20
8.1	1.89689	1.20062	2.48911	1.81137	1.47679	2.52964	1.98634	2.93594	2.99559	2.02492	2.91829	3.83858	1.75439	3.2646	3.6036	4.62963	2.2912	2.00348	1.68998	1.79674	1.03788	1.95394	3.08219	1.58974	1.76991	2.24072	2.35988	1.43923	3.5982	2.31047	3.63864	3.35249	3.69881	2.85111	2.77778	3.34262	7.76471	22.2222	34.3434	23.1481	31.25	24.0385	33.9623	24.4898	27.8846	24.7706	16.5049	23	17.8947
8.12	1.41051	1.51046	1.55569	1.87383	1.31857	1.97628	2.11049	2.58007	2.99559	2.80374	2.62646	3.44488	2.3183	2.92096	3.26577	4.16667	2.06948	1.82927	2.0979	1.40371	1.19357	1.60502	2.87671	1.69231	1.21681	1.79257	2.72861	1.91898	2.84858	1.73285	4.39147	2.77778	2.90621	2.63992	2.77778	2.13556	6.35294	21.2121	32.3232	25	25	15.3846	20.7547	30.6122	25	19.2661	19.4175	31	25.2632
8.14	1.45914	1.23935	2.05352	2.24859	1.42405	3.16206	1.98634	2.84698	3.25991	2.88162	2.82101	3.44488	2.38095	2.74914	2.25225	4.32099	1.69993	2.96167	1.10723	1.34756	1.40114	1.60502	2.05479	1.4359	1.32743	1.34443	1.25369	1.17271	2.3988	2.16606	3.3877	3.63985	3.17041	2.53432	3.31197	2.13556	6.35294	23.2323	34.3434	22.2222	30.2083	29.8077	32.0755	24.4898	22.1154	21.1009	25.2427	17	26.3158
8.16	1.60506	1.23935	1.61792	1.24922	1.52954	1.97628	2.42086	2.66904	2.20264	3.11526	3.21012	3.05118	1.69173	3.60825	3.26577	4.78395	1.62602	3.3101	1.28205	1.01067	2.12766	1.32589	3.63014	2.20513	0.995575	1.72855	2.13864	1.54584	2.84858	1.66065	3.63864	3.63985	4.22721	3.1679	2.35043	2.78552	7.29412	26.2626	33.3333	12.963	29.1667	23.0769	16.0377	30.6122	23.0769	22.0183	9.70874	21	30.5263
8.18	1.07004	0.890782	2.36465	1.93629	0.949367	2.68775	1.8622	2.58007	2.64317	2.64798	2.52918	3.64173	1.8797	3.09278	2.25225	5.09259	2.73466	2.70035	1.74825	1.79674	1.14167	2.37264	4.17808	1.12821	1.93584	2.24072	2.28614	2.1855	2.24888	2.09386	4.01506	3.73563	3.30251	3.48469	2.77778	2.41411	5.41176	26.2626	26.2626	22.2222	26.0417	22.1154	35.8491	28.5714	20.1923	23.8532	22.3301	28	18.9474
8.2	1.36187	0.813323	2.42688	1.87383	1.63502	2.45059	2.11049	2.58007	3.61233	2.57009	3.11284	2.85433	2.38095	3.35052	3.49099	4.16667	2.66075	2.52613	1.98135	1.34756	1.55682	2.30286	2.94521	1.38462	1.43805	1.98464	1.9174	1.54584	2.84858	2.23827	3.63864	3.44828	2.24571	2.85111	3.09829	2.32126	8.47059	29.2929	22.2222	18.5185	23.9583	25	23.5849	35.7143	32.6923	17.4312	20.3883	22	26.3158
8.22	1.60506	1.16189	1.68015	2.74828	1.00211	2.6087	2.48293	3.20285	2.99559	2.33645	2.82101	4.33071	2.44361	3.09278	2.25225	5.09259	1.77384	3.223	1.68998	1.45985	1.14167	2.16329	3.15068	1.33333	1.76991	2.11268	2.80236	1.86567	2.54873	2.67148	4.39147	3.54406	3.43461	3.0623	3.20513	2.78552	6.11765	19.1919	18.1818	19.4444	14.5833	22.1154	27.3585	17.3469	14.4231	23.8532	26.2136	33	18.9474
8.24	1.41051	0.774593	1.61792	2.06121	1.95148	2.45059	2.17256	2.58007	2.99559	2.1028	3.30739	3.24803	1.8797	2.57732	2.36486	5.09259	1.69993	2.1777	1.92308	1.68445	1.50493	1.74459	3.56164	1.28205	1.38274	2.36876	2.72861	2.1322	2.32384	2.31047	3.51317	3.06513	3.17041	2.53432	3.4188	3.15692	8	20.202	24.2424	14.8148	27.0833	18.2692	32.0755	37.7551	19.2308	23.8532	26.2136	24	24.2105
8.26	1.50778	1.00697	1.68015	1.49906	1.26582	3.16206	1.98634	2.75801	3.25991	2.02492	2.33463	3.64173	2.19298	2.14777	2.81532	4.62963	2.95639	3.04878	1.10723	1.85289	1.60872	1.60502	3.69863	1.28205	1.1615	1.66453	2.87611	1.91898	2.92354	2.16606	3.63864	3.06513	4.49141	3.37909	3.84615	2.97122	2.58824	20.202	30.303	27.7778	28.125	25	30.1887	24.4898	25.9615	22.0183	24.2718	34	34.7368
8.28	1.21595	1.31681	2.17797	2.31106	1.42405	2.13439	2.29671	2.40214	2.64317	1.47975	3.50195	3.44488	2.81955	3.09278	2.92793	5.40123	1.92166	2.61324	2.38928	1.17911	1.14167	2.02373	2.80822	1.33333	1.54867	1.21639	2.28614	1.86567	2.54873	2.81588	3.51317	3.9272	3.43461	2.53432	2.88462	2.32126	4.94118	35.3535	25.2525	19.4444	31.25	37.5	26.4151	19.3878	32.6923	19.2661	23.301	33	27.3684
8.3	1.75097	0.852053	1.8046	1.99875	2.1097	2.84585	1.30354	3.11388	2.99559	2.9595	3.21012	3.24803	1.81704	3.00687	3.04054	4.01235	1.55211	2.00348	2.03963	1.7406	1.86819	2.16329	2.46575	1.84615	1.76991	1.60051	2.21239	1.54584	2.62369	1.66065	3.51317	3.16092	3.69881	3.1679	3.63248	2.87837	7.29412	30.303	25.2525	23.1481	29.1667	26.9231	33.9623	26.5306	16.3462	26.6055	19.4175	36	29.4737
8.32	1.41051	1.23935	1.86683	2.37352	1.68776	2.7668	2.23464	2.66904	2.99559	3.11526	2.23735	3.44488	1.62907	3.69416	2.81532	4.78395	2.2912	2.09059	1.74825	1.68445	1.14167	1.46546	3.08219	1.69231	1.82522	2.24072	1.9174	1.65245	2.3988	2.38267	3.88959	3.35249	3.69881	3.2735	2.5641	2.32126	9.41176	19.1919	22.2222	24.0741	26.0417	19.2308	25.4717	29.5918	22.1154	20.1835	24.2718	22	23.1579
8.34	1.70233	0.852053	1.24456	1.74891	1.26582	2.84585	2.545	3.73665	2.37885	2.18069	3.6965	2.75591	2.13033	3.09278	3.49099	3.08642	1.99557	1.30662	1.92308	1.12296	0.934094	2.65178	3.35616	1.4359	1.27212	1.92061	2.0649	2.07889	1.49925	2.23827	3.26223	2.77778	3.03831	2.42872	3.95299	2.78552	9.17647	26.2626	27.2727	21.2963	34.375	33.6538	33.9623	25.5102	19.2308	23.8532	27.1845	19	24.2105
8.36	1.55642	1.0457	1.86683	1.1243	1.68776	2.21344	2.23464	2.66904	3.43612	2.80374	2.62646	2.95276	1.75439	2.74914	2.59009	4.16667	2.51293	3.04878	1.3986	1.17911	0.934094	2.37264	2.67123	1.58974	1.88053	1.34443	2.43363	1.81237	2.62369	2.02166	3.63864	4.5977	2.64201	3.37909	3.31197	2.59981	7.76471	19.1919	23.2323	21.2963	30.2083	22.1154	23.5849	26.5306	25.9615	22.0183	27.1845	25	26.3158
8.38	1.0214	1.20062	1.43124	1.81137	1.26582	2.37154	1.6139	3.73665	2.73128	2.18069	3.21012	3.05118	2.13033	2.66323	2.81532	6.79012	2.2912	2.61324	2.03963	1.7406	1.34925	2.30286	3.15068	1.74359	1.32743	2.11268	3.09735	1.54584	2.47376	2.74368	5.01882	3.63985	3.17041	4.11827	2.99145	1.48561	8.47059	33.3333	27.2727	33.3333	23.9583	21.1538	24.5283	29.5918	28.8462	22.0183	30.0971	34	18.9474
8.4	1.6537	1.62665	1.55569	1.56152	1.74051	2.68775	1.80012	3.02491	2.73128	2.64798	2.82101	2.16535	1.62907	2.92096	2.7027	4.47531	1.99557	2.70035	1.22378	1.516	1.86819	2.02373	3.15068	1.58974	1.65929	1.34443	2.21239	2.1322	2.54873	1.66065	2.38394	2.87356	2.77411	2.53432	3.31197	2.59981	5.88235	21.2121	18.1818	26.8519	23.9583	23.0769	21.6981	32.6531	25.9615	12.844	23.301	25	25.2632
8.42	1.89689	1.31681	2.11574	1.99875	1.63502	2.68775	2.04842	2.58007	2.73128	2.80374	4.47471	3.44488	2.13033	2.66323	3.6036	3.39506	1.69993	2.78746	2.03963	1.68445	1.29735	2.30286	3.83562	1.53846	1.05088	1.34443	1.9174	1.49254	2.02399	2.16606	3.76412	3.44828	2.64201	3.69588	2.77778	2.22841	6.11765	31.3131	22.2222	19.4444	17.7083	24.0385	28.3019	30.6122	25	18.3486	24.2718	31	27.3684
8.44	1.75097	1.00697	1.61792	1.1243	1.37131	2.29249	2.23464	1.77936	2.29075	2.18069	3.98833	2.65748	2.38095	2.66323	3.6036	3.85802	2.36511	2.52613	1.80653	1.57215	1.29735	2.51221	2.46575	1.53846	1.27212	1.66453	2.87611	1.65245	2.02399	2.02166	4.14053	2.87356	2.64201	4.11827	3.20513	2.32126	5.17647	20.202	30.303	19.4444	21.875	24.0385	18.8679	26.5306	24.0385	20.1835	17.4757	27	17.8947
8.46	2.09144	1.08443	1.74238	1.99875	1.79325	3.083	2.23464	2.84698	1.40969	2.64798	2.14008	3.05118	2.25564	2.74914	3.49099	4.47531	2.2912	2.61324	1.6317	1.34756	1.50493	2.79135	2.39726	2.05128	1.88053	1.79257	2.80236	1.01279	2.62369	2.09386	3.63864	2.58621	3.17041	2.53432	3.52564	3.52832	6.82353	28.2828	32.3232	25	30.2083	24.0385	24.5283	20.4082	19.2308	22.9358	34.9515	23	24.2105
8.48	1.50778	0.852053	1.74238	2.18613	1.89873	3.39921	1.67598	3.38078	2.81938	2.80374	2.91829	2.46063	1.75439	2.23368	4.39189	4.47531	2.43902	2.52613	1.68998	1.17911	1.55682	1.88416	3.56164	2.05128	1.88053	1.79257	2.0649	1.75906	2.92354	1.80505	3.01129	3.9272	3.69881	3.37909	2.24359	2.32126	3.76471	25.2525	30.303	25	27.0833	20.1923	18.8679	35.7143	27.8846	14.6789	23.301	27	23.1579
8.5	1.6537	0.852053	1.68015	2.5609	2.1097	2.21344	1.80012	3.11388	3.25991	2.88162	2.52918	5.21654	1.75439	2.66323	4.16667	3.24074	2.88248	2.00348	1.80653	1.96519	1.7644	2.16329	3.69863	1.38462	1.21681	1.92061	1.84366	1.70576	2.54873	2.16606	4.51694	3.63985	4.22721	3.48469	3.09829	3.06407	4.23529	18.1818	34.3434	24.0741	18.75	21.1538	23.5849	22.449	20.1923	19.2661	20.3883	23	27.3684
8.52	1.21595	0.968242	1.92906	2.18613	1.47679	2.68775	1.98634	3.20285	2.64317	2.1028	4.28016	2.75591	2.19298	3.2646	3.04054	3.39506	2.14339	2.96167	1.3986	1.34756	1.29735	1.95394	3.0137	1.69231	1.10619	1.72855	1.9174	1.65245	2.77361	2.09386	3.3877	4.11877	3.30251	3.0623	3.31197	2.50696	6.35294	25.2525	26.2626	25	23.9583	21.1538	20.7547	35.7143	28.8462	24.7706	24.2718	30	16.8421
8.54	1.94553	1.20062	1.68015	2.31106	1.63502	2.68775	2.04842	3.46975	2.73128	2.33645	4.18288	3.93701	1.62907	2.66323	2.7027	3.85802	1.92166	2.87456	1.34033	1.17911	1.81629	1.88416	3.49315	1.69231	1.32743	1.66453	1.47493	1.49254	2.24888	2.31047	3.3877	4.50192	3.17041	4.01267	3.09829	2.04271	5.64706	36.3636	29.2929	23.1481	32.2917	18.2692	14.1509	27.551	26.9231	22.9358	22.3301	24	24.2105
8.56	1.41051	1.27808	1.74238	1.93629	1.16034	2.9249	1.67598	2.58007	2.29075	1.94704	3.21012	2.46063	2.63158	2.14777	4.27928	3.54938	3.10421	3.223	1.45688	1.23526	1.81629	2.30286	3.08219	1.74359	1.76991	1.98464	2.72861	1.97228	2.32384	2.52708	3.88959	4.02299	1.71731	2.53432	2.5641	2.87837	6.11765	24.2424	27.2727	22.2222	21.875	22.1154	31.1321	34.6939	14.4231	18.3486	18.4466	24	13.6842
8.58	1.21595	1.12316	1.24456	1.93629	1.68776	2.68775	1.98634	3.02491	2.73128	2.72586	3.40467	3.83858	1.56642	2.74914	2.25225	4.78395	1.84775	2.70035	1.68998	1.6283	1.7644	1.81438	2.46575	1.33333	1.32743	2.11268	1.99115	2.02559	2.69865	2.09386	3.88959	3.9272	3.56671	1.79514	3.95299	3.06407	6.58824	24.2424	33.3333	26.8519	29.1667	22.1154	27.3585	20.4082	29.8077	19.2661	22.3301	12	23.1579
8.6	1.36187	1.16189	1.92906	1.93629	1.63502	3.00395	1.98634	2.75801	3.25991	2.9595	3.59922	2.85433	2.19298	2.49141	3.26577	3.85802	2.06948	3.04878	1.34033	1.79674	1.19357	2.09351	2.60274	1.58974	1.1615	1.40845	2.80236	1.65245	1.7991	2.16606	3.3877	4.11877	2.77411	2.63992	2.88462	3.52832	7.52941	24.2424	27.2727	25	35.4167	21.1538	17.9245	28.5714	25	13.7615	18.4466	24	28.4211
8.62	1.75097	1.00697	1.74238	1.68645	1.79325	2.13439	1.98634	2.4911	2.81938	2.25857	2.52918	2.65748	2.25564	2.23368	2.47748	4.16667	1.69993	2.78746	2.03963	1.34756	1.60872	2.23308	1.71233	1.69231	2.10177	1.85659	1.99115	1.81237	2.32384	1.44404	2.50941	4.21456	4.35931	3.0623	2.88462	2.69266	6.82353	18.1818	29.2929	22.2222	31.25	22.1154	29.2453	27.551	11.5385	24.7706	24.2718	31	18.9474
8.64	2.23735	1.27808	2.36465	2.06121	1.89873	3.083	2.66915	2.75801	3.25991	2.25857	2.91829	3.24803	1.75439	2.4055	2.92793	5.8642	2.06948	2.61324	1.8648	0.95452	1.24546	2.37264	2.46575	1.28205	1.60398	2.36876	1.99115	2.34542	1.94903	2.09386	4.266	3.63985	3.43461	3.80148	3.52564	2.22841	7.52941	31.3131	31.3131	21.2963	28.125	17.3077	20.7547	17.3469	30.7692	17.4312	18.4466	21	20
8.66	2.09144	1.23935	2.42688	1.93629	1.37131	2.7668	2.42086	2.84698	2.99559	2.49221	3.11284	3.44488	1.69173	3.2646	2.47748	4.16667	2.14339	2.09059	1.3986	1.01067	1.29735	1.88416	3.08219	1.89744	1.43805	2.62484	3.0236	1.43923	1.94903	1.44404	4.39147	4.50192	2.50991	4.11827	2.24359	2.97122	6.35294	26.2626	24.2424	24.0741	30.2083	18.2692	27.3585	21.4286	18.2692	31.1927	21.3592	24	21.0526
8.68	1.6537	1.16189	1.8046	1.74891	1.68776	2.52964	1.73805	3.02491	3.0837	2.02492	3.01556	2.75591	2.3183	2.31959	3.94144	4.93827	1.77384	2.43902	1.80653	1.40371	1.40114	1.95394	2.67123	2.05128	1.10619	1.79257	2.65487	1.91898	2.69865	1.87726	4.01506	6.03448	4.09511	2.85111	2.99145	3.15692	6.35294	18.1818	16.1616	30.5556	18.75	27.8846	26.4151	20.4082	26.9231	24.7706	21.3592	23	26.3158
8.7	2.09144	1.00697	1.30678	2.31106	2.21519	3.32016	2.23464	3.64769	2.55507	2.72586	2.72374	4.33071	2.3183	2.66323	4.5045	4.47531	2.06948	2.96167	2.62238	1.79674	1.55682	2.09351	2.05479	2.10256	1.82522	1.66453	2.28614	1.81237	2.09895	2.16606	2.88582	3.83142	3.17041	2.74551	3.52564	3.80687	4.47059	19.1919	24.2424	21.2963	22.9167	25.9615	15.0943	26.5306	15.3846	15.5963	28.1553	25	24.2105
8.72	1.84825	1.39427	1.8046	1.87383	1.68776	3.00395	2.11049	3.02491	3.25991	2.9595	3.50195	4.03543	2.13033	3.00687	4.27928	4.16667	1.40429	3.04878	2.03963	1.40371	1.81629	2.09351	2.87671	1.48718	1.27212	2.24072	2.43363	1.38593	2.77361	2.09386	5.89711	3.83142	3.56671	3.69588	3.63248	2.69266	4.94118	25.2525	25.2525	26.8519	27.0833	21.1538	29.2453	21.4286	23.0769	23.8532	23.301	32	21.0526
8.74	2.09144	1.12316	1.49347	1.99875	1.52954	4.34783	2.11049	3.46975	2.46696	2.41433	2.72374	2.75591	2.38095	3.2646	4.84234	4.62963	1.99557	2.96167	2.62238	1.96519	1.66061	2.23308	2.53425	1.48718	1.43805	1.85659	1.69617	2.07889	2.62369	2.38267	4.51694	3.06513	4.09511	2.11193	3.09829	2.69266	7.76471	25.2525	20.202	17.5926	22.9167	18.2692	24.5283	29.5918	21.1538	18.3486	20.3883	23	22.1053
8.76	1.79961	1.47173	1.99129	1.49906	1.26582	2.29249	1.98634	2.4911	3.43612	2.80374	2.72374	3.05118	2.44361	2.23368	2.92793	4.93827	1.92166	2.70035	2.03963	1.79674	1.55682	2.30286	2.12329	2.10256	1.7146	1.47247	2.21239	1.81237	2.54873	1.73285	3.51317	3.35249	2.37781	4.75185	3.09829	2.50696	7.29412	28.2828	27.2727	28.7037	27.0833	18.2692	28.3019	33.6735	26.9231	21.1009	18.4466	23	32.6316
8.78	1.99416	1.0457	1.8046	2.24859	1.42405	2.68775	2.42086	3.29181	3.52423	2.18069	3.50195	3.24803	2.3183	2.74914	3.15315	5.70988	2.14339	2.96167	1.98135	1.34756	1.7644	2.51221	3.63014	1.23077	1.32743	2.24072	2.58112	1.70576	2.9985	2.16606	4.266	3.35249	3.17041	2.53432	3.31197	3.99257	5.88235	16.1616	33.3333	20.3704	23.9583	22.1154	19.8113	30.6122	28.8462	19.2661	22.3301	26	24.2105
8.8	1.79961	1.62665	1.74238	1.99875	1.68776	2.6087	1.98634	3.55872	3.34802	2.64798	3.30739	3.64173	1.8797	3.09278	3.37838	6.01852	2.51293	3.3101	2.50583	2.41437	1.34925	2.582	3.35616	2.15385	1.05088	1.72855	2.0649	2.29211	3.74813	2.59928	5.26976	3.63985	2.37781	2.95671	4.2735	3.06407	4.70588	27.2727	21.2121	19.4444	33.3333	21.1538	17.9245	26.5306	25	16.5138	21.3592	22	20
8.82	1.79961	1.23935	1.99129	2.24859	1.21308	3.083	1.92427	2.58007	3.43612	2.64798	3.89105	3.44488	2.00501	1.89003	3.15315	4.78395	2.58684	2.52613	2.03963	1.57215	1.66061	2.16329	3.42466	2.15385	1.54867	2.24072	2.43363	2.29211	3.14843	1.73285	2.76035	2.10728	2.50991	3.59029	3.09829	3.43547	4.94118	28.2828	28.2828	10.1852	23.9583	28.8462	21.6981	22.449	25.9615	15.5963	31.068	25	20
8.84	1.60506	1.0457	1.55569	2.37352	1.37131	3.55731	2.35878	3.02491	2.64317	1.86916	3.40467	4.13386	1.19048	3.09278	3.37838	4.78395	2.14339	2.87456	1.6317	1.34756	1.34925	3.07048	2.46575	1.4359	1.21681	2.1767	2.21239	1.75906	2.84858	2.23827	3.76412	3.06513	2.24571	3.59029	3.52564	2.69266	5.88235	18.1818	30.303	23.1481	14.5833	23.0769	25.4717	28.5714	16.3462	15.5963	25.2427	26	26.3158
8.86	1.84825	1.0457	1.8046	2.06121	1.26582	2.45059	1.80012	1.42349	3.52423	2.9595	3.01556	3.83858	2.00501	3.43643	2.81532	4.32099	2.36511	2.70035	1.68998	1.79674	1.50493	2.51221	3.35616	1.94872	1.32743	1.47247	3.31858	1.49254	2.9985	1.66065	3.76412	2.96935	4.75561	2.00634	3.31197	3.15692	7.29412	26.2626	25.2525	23.1481	33.3333	22.1154	24.5283	30.6122	26.9231	16.5138	18.4466	30	20
8.88	1.84825	0.968242	1.55569	2.24859	1.47679	2.7668	2.545	2.31317	1.5859	3.89408	2.62646	3.34646	2.63158	2.57732	3.15315	4.01235	1.92166	2.78746	1.68998	1.23526	1.29735	2.44243	2.87671	1.69231	1.43805	1.85659	3.09735	1.81237	2.92354	1.94946	3.13676	2.96935	4.75561	2.00634	2.77778	2.78552	5.41176	19.1919	27.2727	27.7778	29.1667	19.2308	23.5849	16.3265	23.0769	17.4312	13.5922	27	21.0526
8.9	1.79961	1.00697	2.73802	2.06121	1.47679	2.37154	2.17256	2.4911	2.55507	2.41433	3.01556	3.34646	2.44361	2.66323	3.26577	3.7037	1.84775	2.35192	2.21445	1.12296	1.50493	2.23308	3.08219	1.58974	1.65929	2.68886	2.35988	1.70576	2.47376	2.16606	2.38394	2.58621	3.30251	2.42872	3.4188	1.76416	7.76471	22.2222	27.2727	32.4074	22.9167	26.9231	24.5283	27.551	25	12.844	23.301	19	24.2105
8.92	1.79961	0.968242	1.92906	1.56152	1.10759	2.13439	2.17256	2.4911	1.85022	2.88162	3.01556	2.75591	1.8797	2.57732	2.7027	3.7037	1.77384	2.43902	1.1655	1.23526	1.45304	1.95394	3.08219	1.64103	1.49336	1.79257	1.84366	1.54584	2.3988	1.80505	2.76035	2.29885	3.83091	2.74551	3.31197	2.97122	5.88235	20.202	36.3636	16.6667	29.1667	25.9615	22.6415	20.4082	19.2308	21.1009	23.301	21	17.8947
8.94	1.55642	1.20062	1.36901	1.87383	1.26582	2.6087	1.6139	2.40214	1.67401	2.57009	3.01556	3.44488	1.94236	2.66323	2.13964	4.62963	1.92166	2.1777	1.45688	1.68445	1.29735	1.95394	2.80822	1.12821	1.43805	1.60051	2.35988	1.70576	2.69865	2.74368	4.266	2.29885	4.88771	2.95671	3.20513	1.94986	3.52941	25.2525	24.2424	24.0741	23.9583	19.2308	23.5849	22.449	20.1923	23.8532	21.3592	18	15.7895
8.96	1.26459	0.968242	1.68015	1.37414	1.16034	2.6087	1.80012	2.04626	2.99559	2.72586	2.62646	1.9685	1.69173	2.31959	3.37838	3.39506	1.40429	1.91638	2.15618	1.45985	1.50493	1.53524	3.28767	1.53846	1.7146	1.92061	2.87611	1.1194	2.24888	1.58845	2.63488	2.68199	3.96301	2.74551	3.63248	1.20706	6.58824	16.1616	25.2525	23.1481	21.875	23.0769	23.5849	23.4694	27.8846	15.5963	16.5049	19	15.7895
8.98	1.75097	1.00697	1.8046	2.18613	0.949367	1.73913	1.55183	1.86833	2.64317	2.72586	2.82101	2.3622	2.06767	3.17869	2.47748	3.24074	2.21729	3.74564	1.57343	1.17911	1.29735	2.37264	2.94521	1.58974	1.54867	1.34443	2.50737	1.65245	2.17391	1.80505	2.38394	2.39464	2.64201	2.21753	2.5641	3.06407	5.64706	27.2727	19.1919	21.2963	29.1667	28.8462	16.9811	20.4082	29.8077	19.2661	24.2718	27	16.8421
9	1.75097	0.929512	1.36901	2.18613	1.74051	1.58103	1.92427	2.31317	2.29075	2.72586	3.01556	3.34646	1.25313	2.49141	3.71622	4.01235	1.33038	2.52613	1.6317	1.6283	1.50493	2.16329	2.87671	1.12821	1.21681	1.53649	1.76991	1.65245	1.49925	1.44404	2.76035	3.44828	4.09511	3.0623	2.77778	2.97122	5.41176	32.3232	25.2525	15.7407	28.125	24.0385	20.7547	30.6122	19.2308	21.1009	24.2718	21	27.3684
9.02	1.84825	1.27808	2.17797	1.87383	1.16034	2.52964	1.42768	3.29181	1.85022	3.03738	1.75097	3.34646	1.4411	2.57732	2.81532	4.62963	1.69993	2.52613	1.10723	1.90904	1.14167	1.81438	2.26027	2.20513	1.38274	1.79257	2.0649	0.959488	1.64918	1.44404	3.26223	2.68199	3.56671	3.37909	2.67094	2.69266	3.52941	22.2222	15.1515	26.8519	22.9167	20.1923	16.9811	25.5102	14.4231	18.3486	24.2718	14	24.2105
9.04	1.70233	1.12316	1.99129	1.87383	1.74051	2.7668	1.6139	2.4911	2.37885	2.88162	2.82101	3.05118	2.13033	1.54639	3.04054	3.54938	2.21729	1.74216	2.03963	1.516	1.08978	2.72156	1.9863	1.12821	1.76991	1.85659	2.43363	1.38593	2.24888	2.09386	4.14053	2.01149	3.83091	3.1679	3.20513	3.15692	5.88235	28.2828	19.1919	23.1481	26.0417	17.3077	26.4151	27.551	21.1538	16.5138	17.4757	32	17.8947
9.06	1.45914	0.929512	1.24456	1.18676	1.63502	2.05534	1.48976	2.4911	1.93833	2.64798	2.33463	2.85433	2.06767	2.4055	2.13964	3.54938	1.62602	1.82927	2.03963	1.516	1.24546	1.95394	2.53425	1.28205	1.27212	1.85659	1.32743	1.0661	2.62369	2.74368	3.51317	3.35249	3.96301	1.79514	2.02991	2.87837	7.29412	23.2323	20.202	25	23.9583	19.2308	25.4717	21.4286	29.8077	10.0917	19.4175	23	20
9.08	2.0428	1.00697	1.74238	2.24859	0.843882	1.42292	2.17256	3.20285	2.37885	2.57009	2.62646	3.44488	2.00501	2.06186	2.36486	4.47531	1.62602	3.57143	1.45688	1.68445	1.86819	1.67481	2.39726	1.28205	1.05088	1.08835	1.9174	1.59915	1.94903	1.80505	2.133	2.49042	4.09511	2.21753	2.24359	1.85701	6.58824	24.2424	25.2525	16.6667	28.125	19.2308	20.7547	23.4694	26.9231	30.2752	20.3883	17	25.2632
9.1	1.50778	1.08443	1.30678	1.68645	1.58228	1.97628	1.80012	2.75801	2.20264	1.7134	2.33463	2.46063	1.06516	1.80412	2.25225	4.01235	1.40429	1.48084	1.45688	1.45985	1.24546	1.95394	2.53425	1.23077	1.10619	1.34443	2.13864	1.54584	1.7991	2.23827	3.63864	2.10728	3.69881	2.32313	3.63248	2.59981	5.17647	23.2323	24.2424	17.5926	27.0833	16.3462	18.8679	17.3469	27.8846	22.9358	17.4757	17	13.6842
9.12	1.0214	0.813323	1.74238	1.81137	1.52954	2.21344	1.42768	2.66904	2.37885	2.88162	2.0428	2.55906	2.06767	2.57732	2.02703	4.01235	1.99557	2.78746	1.3986	2.07748	1.55682	1.81438	1.84932	1.33333	1.38274	1.98464	1.10619	1.43923	2.32384	1.66065	3.26223	2.87356	2.77411	3.2735	2.45726	3.15692	4.70588	17.1717	33.3333	18.5185	20.8333	21.1538	17.9245	16.3265	22.1154	26.6055	20.3883	25	21.0526
9.14	1.07004	0.813323	1.43124	1.37414	1.26582	1.58103	2.23464	2.93594	2.20264	2.49221	2.62646	2.55906	1.94236	2.74914	2.81532	2.62346	2.21729	2.43902	1.80653	1.06682	1.50493	1.88416	1.91781	1.02564	1.10619	1.98464	2.13864	1.1194	2.24888	2.67148	3.88959	2.20307	3.03831	2.42872	1.60256	2.59981	6.82353	17.1717	26.2626	16.6667	27.0833	22.1154	18.8679	23.4694	25	16.5138	16.5049	27	18.9474
9.16	1.31323	1.00697	2.17797	1.93629	1.52954	1.58103	2.17256	3.02491	2.11454	2.1028	2.23735	2.95276	1.50376	1.71821	3.15315	2.9321	1.77384	2.61324	1.04895	1.29141	1.40114	1.81438	2.32877	1.12821	1.38274	1.34443	1.54867	1.0661	1.49925	2.23827	2.88582	2.96935	1.98151	2.63992	2.35043	2.32126	4	21.2121	25.2525	19.4444	18.75	25.9615	20.7547	21.4286	13.4615	20.1835	11.6505	14	15.7895
9.18	1.36187	0.852053	0.871189	2.06121	1.68776	2.45059	1.80012	2.13523	3.61233	2.25857	2.91829	3.64173	2.06767	2.4055	2.81532	2.00617	1.69993	2.09059	2.0979	1.40371	1.34925	1.39567	2.53425	1.28205	1.88053	1.08835	1.69617	1.49254	1.49925	1.87726	1.88206	2.20307	2.90621	2.21753	3.09829	2.41411	4.47059	16.1616	28.2828	17.5926	23.9583	22.1154	15.0943	31.6327	23.0769	22.0183	26.2136	25	13.6842
9.2	0.875486	0.929512	1.55569	1.62399	1.21308	1.81818	1.55183	2.93594	1.93833	3.27103	2.14008	2.26378	1.56642	2.92096	3.82883	4.62963	1.25647	2.87456	1.3986	1.01067	1.50493	1.74459	2.87671	1.28205	1.49336	1.66453	1.40118	1.49254	2.9985	3.10469	4.266	1.81992	2.11361	2.21753	2.5641	2.87837	5.88235	17.1717	26.2626	25	18.75	23.0769	18.8679	25.5102	14.4231	12.844	22.3301	25	16.8421
9.22	1.70233	0.968242	1.99129	1.24922	1.26582	2.21344	2.11049	2.84698	1.85022	2.25857	2.82101	2.95276	2.00501	2.57732	2.7027	4.47531	1.84775	2.26481	1.74825	0.842223	0.8822	1.74459	2.12329	1.38462	1.27212	1.40845	2.13864	1.65245	2.47376	1.80505	3.88959	2.58621	3.43461	2.63992	2.5641	2.41411	4.94118	20.202	23.2323	22.2222	25	21.1538	22.6415	25.5102	24.0385	23.8532	25.2427	24	20
9.24	1.0214	0.697134	1.36901	1.4366	1.00211	1.18577	1.92427	1.9573	1.76211	2.57009	3.11284	1.5748	2.13033	2.14777	1.57658	4.16667	1.99557	2.61324	1.34033	1.34756	0.8822	1.81438	1.9863	1.58974	1.10619	1.34443	1.9174	1.75906	1.87406	2.02166	2.76035	3.06513	3.83091	3.69588	3.95299	2.04271	4.70588	20.202	33.3333	12.963	20.8333	25.9615	26.4151	27.551	21.1538	20.1835	24.2718	29	21.0526
9.26	1.41051	1.00697	1.8046	1.37414	0.527426	2.21344	1.80012	2.2242	2.29075	2.33645	2.23735	2.16535	1.75439	2.31959	2.36486	3.39506	1.62602	2.52613	1.28205	1.45985	1.40114	1.74459	1.91781	1.17949	1.38274	1.60051	2.13864	1.27932	2.32384	2.45487	3.63864	1.81992	2.50991	2.85111	2.13675	2.04271	4.23529	25.2525	23.2323	16.6667	26.0417	28.8462	16.9811	18.3673	13.4615	12.844	19.4175	26	16.8421
9.28	1.89689	1.0457	1.43124	1.87383	1.42405	1.73913	1.6139	3.02491	1.93833	2.1028	2.91829	2.3622	1.75439	2.4055	3.49099	2.00617	2.14339	2.87456	1.74825	1.7406	1.71251	1.95394	1.91781	1.17949	1.60398	1.53649	2.58112	1.65245	1.57421	2.02166	3.01129	3.06513	3.03831	3.48469	2.99145	2.69266	5.17647	14.1414	24.2424	25	26.0417	24.0385	22.6415	25.5102	24.0385	18.3486	17.4757	25	16.8421
9.3	0.972763	0.852053	1.74238	1.81137	0.843882	1.97628	1.24146	2.2242	2.81938	1.79128	2.43191	2.06693	1.69173	1.89003	2.7027	3.7037	2.21729	1.91638	1.6317	1.23526	1.55682	2.16329	2.26027	1.64103	1.38274	1.28041	1.9174	1.17271	1.7991	2.23827	2.25847	2.29885	3.30251	2.85111	2.13675	2.87837	5.41176	17.1717	21.2121	24.0741	20.8333	21.1538	18.8679	12.2449	25	21.1009	13.5922	22	20
9.32	1.16732	1.12316	1.1201	1.68645	1.63502	2.21344	2.04842	2.4911	2.02643	2.1028	2.0428	3.34646	1.69173	2.92096	2.47748	5.70988	1.40429	2.09059	1.34033	1.57215	1.92008	2.23308	2.46575	1.12821	1.21681	2.04866	2.0649	1.01279	2.77361	3.10469	3.63864	2.68199	3.56671	1.68955	3.20513	2.41411	4	24.2424	23.2323	16.6667	29.1667	22.1154	19.8113	24.4898	23.0769	14.6789	23.301	20	21.0526
9.34	1.79961	1.00697	1.55569	1.74891	1.37131	2.05534	1.92427	2.04626	2.29075	1.86916	2.82101	2.3622	1.69173	3.35052	2.59009	3.54938	1.55211	1.56794	1.3986	1.57215	0.830306	1.11654	2.67123	1.28205	1.21681	1.85659	2.21239	1.33262	2.09895	2.23827	3.01129	3.06513	2.50991	2.63992	3.20513	2.32126	6.11765	12.1212	20.202	23.1481	19.7917	20.1923	16.0377	31.6327	15.3846	20.1835	16.5049	20	11.5789
9.36	1.26459	0.852053	1.49347	1.4366	1.58228	2.13439	1.30354	3.46975	2.11454	1.55763	2.72374	3.24803	2.69424	2.49141	2.7027	2.62346	1.55211	2.43902	1.6317	0.898372	1.03788	1.53524	2.53425	1.12821	1.60398	1.53649	1.62242	1.27932	2.17391	2.31047	1.63112	2.29885	3.83091	3.48469	2.24359	2.69266	4.23529	23.2323	24.2424	25	20.8333	25.9615	33.0189	30.6122	25	17.4312	19.4175	14	20
9.38	1.55642	0.580945	1.30678	1.37414	1.68776	2.21344	1.05525	1.77936	1.93833	2.41433	3.01556	3.05118	1.75439	2.14777	2.36486	3.24074	1.84775	2.26481	0.932401	1.57215	1.50493	2.16329	1.64384	1.12821	1.27212	1.28041	2.13864	1.0661	2.47376	1.08303	2.76035	2.77778	1.98151	3.48469	2.88462	1.94986	3.52941	22.2222	23.2323	21.2963	26.0417	20.1923	29.2453	18.3673	20.1923	23.8532	17.4757	12	17.8947
9.4	1.21595	0.735864	1.68015	1.1243	1.31857	1.42292	1.05525	1.69039	1.76211	1.63551	2.43191	3.14961	1.81704	1.28866	2.7027	4.16667	2.21729	2.78746	1.57343	1.516	1.40114	1.88416	2.05479	1.69231	1.60398	1.02433	1.84366	1.54584	1.57421	1.66065	3.3877	2.68199	2.90621	2.74551	2.45726	2.78552	4.23529	30.303	20.202	19.4444	30.2083	15.3846	20.7547	25.5102	20.1923	16.5138	23.301	18	29.4737
9.42	1.26459	0.929512	0.871189	1.87383	1.31857	1.81818	1.8622	1.86833	2.02643	1.86916	2.72374	1.67323	1.81704	2.06186	2.59009	3.24074	1.62602	1.65505	1.34033	1.17911	1.40114	1.95394	2.32877	1.12821	1.38274	1.72855	2.21239	2.02559	1.1994	1.80505	2.133	1.81992	3.56671	3.37909	2.77778	2.59981	6.11765	16.1616	26.2626	20.3704	19.7917	18.2692	11.3208	19.3878	25.9615	15.5963	15.534	25	18.9474
9.44	1.07004	0.697134	1.43124	2.06121	1.52954	1.73913	1.8622	2.31317	2.20264	1.63551	3.89105	1.5748	1.69173	2.31959	2.47748	4.47531	1.69993	1.56794	1.6317	1.23526	1.45304	2.02373	2.73973	0.974359	1.05088	1.28041	1.9174	1.22601	1.42429	1.29964	2.38394	1.62835	4.22721	2.21753	2.77778	2.78552	5.17647	16.1616	20.202	30.5556	26.0417	11.5385	25.4717	22.449	19.2308	14.6789	18.4466	22	20
9.46	0.924125	0.968242	1.36901	1.87383	1.16034	1.73913	2.04842	2.31317	1.67401	2.33645	2.33463	3.14961	1.94236	2.31959	2.92793	4.62963	1.33038	1.91638	1.34033	2.07748	1.29735	1.46546	2.12329	1.69231	1.49336	1.53649	1.25369	1.81237	1.94903	2.09386	3.76412	2.20307	2.37781	2.11193	2.67094	1.76416	5.88235	24.2424	20.202	24.0741	23.9583	17.3077	21.6981	31.6327	16.3462	16.5138	21.3592	16	24.2105
9.48	0.826848	1.20062	1.05787	1.74891	0.843882	1.34387	1.55183	2.40214	2.37885	2.33645	1.36187	2.75591	2.06767	1.6323	2.92793	3.08642	1.55211	3.3101	1.3986	1.90904	1.40114	1.60502	2.05479	1.28205	1.27212	1.60051	1.9174	1.75906	1.94903	2.23827	3.13676	2.87356	2.24571	2.00634	1.7094	2.22841	4.23529	16.1616	21.2121	15.7407	28.125	17.3077	19.8113	22.449	16.3462	17.4312	20.3883	25	15.7895
9.5	1.16732	1.12316	1.55569	2.24859	1.16034	2.21344	1.42768	2.58007	2.37885	2.25857	2.33463	2.26378	1.31579	2.4055	2.36486	3.85802	1.40429	2.52613	1.51515	1.6283	1.08978	1.95394	2.94521	1.69231	1.43805	2.11268	1.32743	1.75906	1.42429	2.02166	2.50941	2.29885	3.43461	1.90074	2.99145	2.50696	6.82353	17.1717	16.1616	18.5185	22.9167	21.1538	16.0377	21.4286	26.9231	19.2661	20.3883	17	26.3158
9.52	1.11868	1.00697	1.36901	1.49906	1.31857	2.21344	1.80012	2.66904	2.46696	2.18069	1.94553	1.9685	1.37845	2.23368	3.6036	2.9321	1.77384	2.43902	1.22378	0.898372	1.50493	1.88416	1.91781	1.07692	1.1615	1.60051	1.47493	1.17271	1.94903	1.94946	3.76412	2.29885	2.90621	1.37276	2.24359	2.69266	5.64706	20.202	14.1414	27.7778	14.5833	18.2692	16.0377	17.3469	20.1923	17.4312	22.3301	16	17.8947
9.54	1.50778	1.0457	1.8046	1.49906	1.42405	1.66008	1.30354	2.58007	1.85022	1.94704	3.01556	3.14961	1.69173	2.31959	2.81532	4.16667	1.77384	1.82927	1.45688	1.17911	1.19357	1.32589	2.32877	1.28205	1.7146	1.08835	1.84366	1.27932	1.94903	1.94946	2.25847	2.68199	2.90621	2.21753	1.92308	2.04271	5.64706	16.1616	23.2323	25	20.8333	24.0385	20.7547	29.5918	25	19.2661	16.5049	23	23.1579
9.56	1.21595	0.852053	1.1201	1.62399	0.791139	1.89723	2.04842	2.4911	1.5859	1.47975	2.91829	2.55906	1.69173	1.89003	3.26577	3.08642	1.69993	2.09059	1.51515	0.95452	1.66061	1.53524	2.67123	1.02564	1.10619	1.47247	2.21239	1.49254	2.17391	1.80505	2.76035	2.77778	2.50991	1.68955	2.02991	3.24977	6.58824	18.1818	21.2121	17.5926	13.5417	18.2692	12.2642	21.4286	25	14.6789	19.4175	27	18.9474
9.58	0.875486	0.697134	1.68015	1.62399	1.05485	2.37154	1.8622	3.02491	2.64317	2.41433	2.0428	2.55906	2.00501	1.97595	3.71622	4.47531	1.77384	1.65505	1.1655	1.06682	0.726518	1.11654	2.46575	0.717949	0.995575	1.47247	1.69617	1.54584	2.84858	2.23827	1.88206	3.2567	2.90621	2.85111	1.60256	2.22841	5.88235	16.1616	14.1414	25.9259	28.125	17.3077	18.8679	15.3061	19.2308	21.1009	24.2718	23	26.3158
9.6	0.826848	0.697134	1.49347	1.31168	1.16034	2.13439	1.98634	2.13523	3.70044	1.79128	1.6537	2.85433	2.50627	1.89003	2.25225	2.31481	1.25647	2.35192	1.10723	1.34756	1.19357	1.67481	2.60274	1.02564	1.32743	1.47247	1.47493	1.38593	2.17391	1.94946	2.38394	2.10728	1.71731	1.79514	2.67094	2.13556	6.82353	18.1818	27.2727	22.2222	23.9583	15.3846	27.3585	21.4286	13.4615	27.5229	23.301	19	14.7368
9.62	1.16732	0.503486	1.49347	1.49906	1.31857	2.29249	1.73805	3.29181	3.0837	2.49221	2.62646	2.65748	2.3183	2.66323	1.68919	4.93827	1.4782	1.82927	1.3986	1.6283	1.29735	1.60502	2.32877	1.12821	1.05088	2.04866	1.69617	1.75906	1.27436	1.58845	3.13676	2.77778	2.64201	2.42872	2.99145	2.50696	4.94118	15.1515	24.2424	23.1481	33.3333	18.2692	12.2642	16.3265	22.1154	21.1009	23.301	20	18.9474
9.64	1.45914	0.852053	1.8046	1.37414	1.21308	1.81818	2.17256	2.13523	2.81938	2.57009	2.33463	2.16535	2.13033	2.49141	3.26577	3.08642	1.62602	2.09059	1.51515	0.95452	1.29735	1.32589	2.39726	1.74359	1.21681	1.85659	1.54867	1.43923	2.84858	2.02166	3.88959	2.96935	1.5852	1.79514	2.35043	1.85701	6.58824	18.1818	20.202	20.3704	33.3333	22.1154	16.9811	19.3878	23.0769	14.6789	18.4466	26	21.0526
9.66	1.16732	0.658404	1.86683	1.18676	1.26582	2.45059	1.42768	2.40214	2.29075	2.80374	2.0428	1.9685	2.00501	2.23368	2.25225	3.24074	1.62602	3.04878	1.10723	1.34756	1.08978	1.60502	2.94521	1.12821	1.10619	1.40845	1.40118	1.17271	2.9985	2.23827	2.38394	2.29885	2.90621	2.63992	2.77778	2.59981	3.52941	14.1414	16.1616	19.4444	22.9167	20.1923	17.9245	20.4082	26.9231	20.1835	20.3883	18	12.6316
9.68	1.31323	0.929512	1.36901	1.56152	1.10759	2.29249	1.55183	2.31317	2.02643	1.7134	2.14008	2.46063	1.4411	2.4055	1.8018	4.01235	1.55211	2.09059	1.68998	1.34756	1.03788	1.53524	2.32877	1.17949	1.60398	1.53649	1.25369	1.27932	1.87406	1.80505	2.76035	2.58621	2.11361	2.95671	2.35043	2.41411	4.47059	19.1919	14.1414	24.0741	14.5833	18.2692	21.6981	27.551	22.1154	13.7615	18.4466	21	20
9.7	1.21595	1.08443	1.05787	1.49906	1.47679	1.50198	1.55183	1.86833	2.20264	1.16822	3.30739	2.85433	1.75439	2.57732	3.37838	4.32099	0.960828	2.00348	1.3986	1.45985	0.830306	1.46546	2.26027	0.923077	1.7146	1.02433	1.17994	1.65245	1.87406	1.80505	3.63864	2.77778	2.64201	2.32313	2.13675	2.32126	5.64706	16.1616	24.2424	18.5185	22.9167	19.2308	16.9811	22.449	23.0769	18.3486	14.5631	22	27.3684
9.72	1.26459	0.735864	1.24456	1.37414	1.37131	2.21344	1.67598	1.60142	2.29075	1.86916	2.33463	2.65748	1.94236	1.89003	2.7027	3.24074	2.36511	1.39373	1.6317	1.29141	1.34925	2.09351	2.87671	1.33333	0.774336	1.53649	1.25369	1.17271	1.94903	2.02166	2.63488	2.29885	3.03831	2.53432	2.5641	2.41411	4.47059	21.2121	23.2323	21.2963	25	16.3462	16.0377	25.5102	20.1923	18.3486	21.3592	21	20
9.74	1.0214	0.852053	1.1201	1.74891	1.05485	1.26482	1.6139	2.4911	2.02643	1.63551	2.43191	2.95276	1.69173	1.6323	2.59009	4.78395	1.62602	2.35192	1.45688	1.01067	1.03788	1.74459	1.9863	1.23077	1.49336	1.15237	1.62242	1.54584	1.94903	1.73285	3.26223	2.68199	3.03831	2.42872	1.60256	2.50696	4.94118	15.1515	18.1818	18.5185	25	16.3462	13.2075	18.3673	17.3077	11.0092	19.4175	20	26.3158
9.76	1.79961	0.890782	1.55569	1.49906	1.37131	2.37154	1.36561	3.38078	2.11454	2.72586	2.43191	2.16535	1.8797	2.31959	3.04054	2.31481	1.18256	2.52613	1.34033	1.40371	1.24546	2.02373	2.26027	1.17949	1.32743	1.60051	2.50737	0.799574	2.47376	1.58845	3.01129	3.2567	3.69881	2.00634	2.24359	2.04271	3.52941	21.2121	22.2222	24.0741	12.5	17.3077	17.9245	23.4694	20.1923	14.6789	18.4466	29	22.1053
9.78	1.36187	0.968242	1.55569	1.31168	1.10759	2.45059	1.92427	3.02491	2.90749	2.18069	2.62646	2.26378	1.56642	2.06186	2.47748	3.7037	1.4782	2.52613	1.3986	0.95452	1.45304	1.11654	2.26027	1.07692	1.27212	1.53649	2.28614	1.33262	1.64918	2.31047	2.88582	2.20307	2.24571	2.21753	2.24359	1.57846	4	18.1818	18.1818	25	25	25	22.6415	20.4082	19.2308	18.3486	23.301	17	21.0526
9.8	1.16732	0.929512	1.1201	1.4366	1.16034	1.81818	1.36561	2.84698	2.73128	2.02492	2.23735	2.95276	1.56642	2.49141	2.7027	4.47531	1.77384	1.82927	1.68998	1.12296	1.03788	1.60502	2.32877	1.58974	1.65929	1.28041	1.69617	1.70576	1.49925	1.73285	3.26223	2.68199	3.17041	3.0623	1.81624	1.85701	4.94118	18.1818	21.2121	20.3704	12.5	9.61538	18.8679	26.5306	22.1154	14.6789	13.5922	28	20
9.82	1.07004	0.852053	1.1201	1.49906	1.00211	1.42292	1.48976	2.2242	2.73128	2.1028	2.23735	2.46063	1.31579	2.06186	2.47748	3.39506	1.77384	1.56794	1.34033	1.06682	0.8822	1.25611	2.19178	1.23077	1.32743	1.92061	1.9174	1.59915	2.09895	1.80505	2.63488	2.49042	2.77411	2.63992	2.5641	2.50696	5.88235	11.1111	22.2222	21.2963	36.4583	17.3077	10.3774	20.4082	24.0385	7.33945	12.6214	20	16.8421
9.84	1.31323	0.968242	1.43124	1.74891	1.16034	1.66008	1.24146	2.75801	3.61233	1.79128	2.23735	2.65748	2.25564	2.14777	2.7027	5.24691	1.69993	2.43902	1.28205	1.57215	1.29735	1.25611	2.19178	1.64103	0.995575	1.02433	1.54867	1.0661	1.94903	1.51625	3.01129	2.39464	1.84941	1.47835	3.4188	1.67131	2.82353	31.3131	16.1616	19.4444	23.9583	19.2308	14.1509	14.2857	24.0385	18.3486	21.3592	20	10.5263
9.86	1.31323	0.852053	1.55569	0.811993	1.05485	1.81818	1.98634	2.13523	2.90749	2.41433	1.6537	4.03543	2.3183	1.80412	2.59009	2.62346	1.4782	1.91638	1.92308	0.842223	1.03788	1.39567	2.39726	1.69231	1.49336	1.66453	1.84366	2.02559	1.34933	2.16606	3.26223	3.06513	3.30251	2.42872	1.06838	2.04271	6.11765	20.202	24.2424	25	18.75	9.61538	20.7547	19.3878	18.2692	13.7615	22.3301	15	23.1579
9.88	0.632296	0.890782	1.74238	0.999375	1.00211	1.26482	1.48976	2.4911	1.23348	1.79128	1.94553	2.65748	1.62907	1.54639	2.13964	3.54938	1.69993	2.26481	0.757576	1.34756	1.50493	1.18632	2.39726	0.666667	1.1615	1.21639	1.40118	1.22601	2.77361	1.94946	3.26223	2.20307	1.84941	2.32313	3.63248	1.94986	5.64706	18.1818	20.202	19.4444	27.0833	25.9615	10.3774	25.5102	18.2692	17.4312	18.4466	27	22.1053
9.9	1.26459	0.852053	0.933416	1.4366	0.896624	1.02767	1.92427	2.31317	2.11454	2.33645	1.75097	2.26378	2.13033	2.4055	2.47748	3.85802	1.62602	2.43902	1.57343	0.786075	0.934094	1.67481	2.26027	1.07692	1.27212	1.08835	1.54867	1.65245	1.57421	2.23827	2.25847	2.68199	2.64201	1.90074	2.77778	1.67131	5.17647	19.1919	17.1717	18.5185	31.25	14.4231	19.8113	24.4898	12.5	18.3486	15.534	16	17.8947
9.92	1.31323	0.774593	1.61792	1.18676	0.527426	2.05534	2.23464	2.2242	2.20264	2.41433	2.43191	2.65748	1.8797	3.35052	3.37838	3.39506	2.2912	2.26481	1.10723	1.01067	1.40114	1.74459	2.53425	1.07692	1.38274	1.34443	1.69617	1.01279	1.87406	1.58845	3.26223	2.77778	1.71731	2.11193	2.35043	2.32126	4.70588	29.2929	18.1818	20.3704	19.7917	21.1538	16.0377	8.16327	19.2308	25.6881	18.4466	30	24.2105
9.94	0.924125	0.503486	1.36901	2.06121	1.52954	1.81818	0.993172	2.66904	2.46696	2.1028	2.43191	1.87008	1.50376	2.06186	3.15315	5.24691	0.886918	1.74216	1.57343	1.45985	1.45304	1.39567	2.32877	1.4359	0.829646	1.08835	1.76991	1.0661	1.57421	2.67148	2.63488	2.87356	2.77411	2.21753	2.67094	1.39276	4.70588	19.1919	17.1717	12.963	19.7917	22.1154	16.9811	20.4082	16.3462	22.9358	13.5922	23	24.2105
9.96	1.11868	0.658404	1.1201	1.06184	1.37131	2.7668	1.36561	2.58007	2.90749	2.49221	2.0428	2.16535	1.81704	2.31959	2.59009	3.85802	1.33038	2.78746	1.10723	1.6283	1.14167	1.53524	1.57534	1.33333	1.21681	1.21639	1.54867	1.81237	1.94903	2.23827	2.63488	2.20307	1.71731	2.95671	2.35043	1.48561	4.70588	30.303	22.2222	14.8148	20.8333	20.1923	23.5849	19.3878	19.2308	25.6881	13.5922	29	23.1579
9.98	1.16732	0.813323	1.86683	1.93629	1.21308	2.13439	1.80012	2.31317	1.67401	2.18069	2.52918	2.46063	1.69173	2.14777	2.25225	3.7037	1.84775	1.91638	1.04895	1.01067	1.14167	1.39567	1.91781	0.974359	1.1615	1.98464	1.32743	1.43923	2.24888	1.80505	2.25847	1.91571	2.37781	1.90074	3.09829	2.59981	5.41176	20.202	24.2424	28.7037	22.9167	22.1154	18.8679	20.4082	20.1923	15.5963	25.2427	23	16.8421
10	1.21595	0.813323	1.36901	1.68645	0.949367	2.7668	1.17939	3.38078	2.46696	1.79128	3.40467	2.06693	1.69173	2.31959	3.26577	2.77778	2.2912	2.35192	1.28205	1.06682	0.778412	1.88416	2.67123	1.53846	1.27212	1.21639	1.99115	1.33262	1.7991	1.29964	2.76035	2.39464	2.24571	2.21753	2.45726	2.50696	4	16.1616	22.2222	15.7407	23.9583	19.2308	24.5283	25.5102	13.4615	17.4312	20.3883	21	18.9474
10.02	1.36187	0.968242	1.05787	1.18676	1.31857	1.18577	1.30354	2.2242	1.76211	2.25857	1.6537	1.08268	1.94236	3.09278	2.81532	3.08642	1.62602	2.70035	1.28205	0.95452	1.03788	1.67481	1.84932	0.974359	0.995575	1.53649	1.69617	0.906183	2.17391	1.37184	2.76035	3.06513	2.64201	2.63992	2.5641	3.24977	5.88235	19.1919	24.2424	16.6667	14.5833	22.1154	15.0943	19.3878	15.3846	15.5963	12.6214	14	16.8421
10.04	1.11868	0.580945	1.24456	1.74891	1.16034	1.18577	0.993172	2.75801	1.5859	2.49221	3.30739	1.5748	2.13033	1.80412	2.25225	2.62346	1.40429	1.91638	1.34033	0.898372	0.8822	1.46546	1.71233	1.17949	1.32743	1.66453	2.35988	0.906183	2.32384	1.01083	2.88582	2.20307	3.17041	2.11193	2.02991	2.13556	4.47059	19.1919	23.2323	11.1111	19.7917	12.5	15.0943	27.551	20.1923	11.0092	20.3883	12	23.1579
10.06	1.07004	0.929512	1.74238	1.31168	0.949367	2.29249	1.8622	2.75801	1.93833	2.1028	2.72374	1.87008	1.4411	3.00687	2.92793	3.08642	1.69993	1.74216	1.80653	1.40371	1.29735	1.53524	2.05479	1.12821	1.32743	1.53649	1.62242	1.91898	1.94903	1.87726	3.3877	1.62835	1.321	1.90074	2.77778	2.22841	4.70588	16.1616	27.2727	17.5926	14.5833	15.3846	12.2642	19.3878	22.1154	9.17431	18.4466	15	28.4211
10.08	1.84825	0.929512	1.1201	1.06184	1.05485	1.66008	1.73805	1.51246	2.11454	2.33645	3.01556	3.54331	2.19298	2.23368	1.91441	3.08642	1.62602	2.87456	1.10723	1.12296	1.24546	2.16329	2.32877	0.923077	1.05088	1.34443	2.21239	1.1194	1.57421	1.87726	2.63488	3.44828	3.69881	2.74551	2.24359	1.57846	5.41176	9.09091	24.2424	20.3704	22.9167	16.3462	15.0943	15.3061	13.4615	17.4312	23.301	31	28.4211
10.1	1.07004	0.929512	1.24456	1.68645	1.05485	1.50198	1.80012	2.13523	1.5859	2.25857	3.01556	1.37795	1.56642	1.80412	1.35135	2.62346	1.4782	2.1777	0.757576	1.34756	0.985989	1.74459	1.78082	0.974359	1.65929	1.40845	1.54867	1.22601	2.24888	1.51625	2.00753	2.68199	2.50991	2.42872	2.35043	2.13556	5.88235	20.202	19.1919	19.4444	22.9167	28.8462	16.9811	32.6531	13.4615	10.0917	12.6214	17	16.8421
10.12	1.36187	0.697134	1.24456	1.62399	1.05485	1.66008	1.48976	1.77936	2.11454	2.1028	2.23735	2.46063	1.94236	1.80412	3.04054	3.54938	2.06948	1.48084	1.3986	1.34756	0.985989	2.23308	2.53425	1.33333	0.774336	1.40845	2.28614	1.0661	2.09895	1.37184	2.38394	2.29885	2.50991	2.63992	3.52564	1.76416	4.94118	19.1919	29.2929	17.5926	32.2917	25	17.9245	15.3061	14.4231	11.9266	18.4466	23	22.1053
10.14	1.16732	1.35554	1.05787	1.37414	1.42405	1.97628	1.17939	2.84698	1.93833	2.9595	2.82101	1.67323	1.50376	2.31959	2.59009	3.24074	0.960828	2.35192	1.22378	1.12296	1.60872	2.09351	2.19178	1.02564	1.32743	1.40845	1.69617	1.59915	2.02399	2.23827	3.26223	2.58621	2.50991	2.21753	2.5641	3.06407	4.23529	17.1717	24.2424	23.1481	16.6667	23.0769	24.5283	14.2857	18.2692	19.2661	20.3883	22	21.0526
10.16	1.79961	1.00697	1.30678	1.31168	1.21308	2.37154	1.55183	2.2242	2.64317	2.02492	2.23735	1.77165	0.877193	2.14777	1.35135	4.16667	1.62602	2.00348	1.57343	0.898372	1.55682	1.95394	2.94521	1.33333	1.05088	1.53649	2.0649	1.70576	1.57421	1.94946	1.88206	2.20307	2.24571	1.90074	2.35043	2.22841	3.29412	18.1818	23.2323	14.8148	22.9167	16.3462	16.0377	19.3878	21.1538	14.6789	20.3883	24	14.7368
10.18	1.21595	0.774593	1.24456	1.68645	1.31857	1.42292	1.8622	1.9573	2.02643	2.41433	2.52918	2.16535	1.75439	2.83505	2.13964	3.54938	1.77384	1.91638	1.34033	1.57215	1.71251	1.46546	2.53425	1.02564	1.38274	0.960307	1.17994	1.22601	2.17391	2.16606	3.3877	2.49042	3.43461	2.11193	3.09829	1.20706	4.70588	18.1818	23.2323	12.963	19.7917	14.4231	13.2075	14.2857	17.3077	15.5963	20.3883	13	20
10.2	1.0214	0.929512	1.49347	1.37414	0.949367	2.29249	1.48976	2.4911	2.02643	2.18069	3.40467	2.55906	2.00501	1.6323	2.13964	3.39506	1.77384	1.65505	1.1655	1.06682	1.29735	1.60502	1.9863	1.48718	1.32743	1.40845	1.32743	1.17271	2.17391	1.94946	3.13676	2.01149	1.0568	2.63992	2.35043	1.85701	6.11765	21.2121	20.202	17.5926	26.0417	23.0769	18.8679	20.4082	20.1923	17.4312	11.6505	16	14.7368
10.22	0.924125	0.542215	1.18233	1.4366	0.791139	1.97628	2.17256	1.69039	1.67401	2.49221	2.52918	1.5748	1.62907	2.4055	3.04054	3.08642	1.62602	2.00348	1.22378	1.06682	1.40114	1.81438	2.19178	1.02564	0.774336	1.28041	2.21239	1.81237	1.42429	1.87726	3.26223	1.91571	2.24571	2.42872	2.35043	1.67131	8	16.1616	22.2222	18.5185	16.6667	20.1923	18.8679	23.4694	14.4231	20.1835	8.73786	18	21.0526
10.24	1.0214	0.852053	1.68015	1.99875	1.95148	1.66008	1.55183	2.04626	2.02643	2.49221	2.72374	1.9685	2.19298	2.92096	2.47748	3.24074	1.55211	2.09059	1.1655	1.12296	1.08978	1.46546	2.32877	1.12821	1.27212	1.53649	1.47493	1.17271	2.54873	1.94946	2.50941	2.01149	3.17041	1.68955	3.31197	2.22841	4.94118	16.1616	14.1414	14.8148	19.7917	20.1923	14.1509	22.449	19.2308	21.1009	19.4175	17	20
10.26	1.0214	0.890782	1.1201	1.56152	0.791139	1.97628	1.6139	2.40214	2.64317	1.32399	2.14008	2.85433	1.69173	1.97595	3.04054	3.7037	1.55211	2.1777	1.3986	1.34756	1.19357	1.32589	2.32877	1.02564	1.82522	1.53649	1.40118	1.0661	1.87406	1.66065	1.88206	2.49042	2.24571	2.42872	2.35043	1.76416	4.23529	18.1818	16.1616	18.5185	26.0417	19.2308	19.8113	22.449	12.5	9.17431	16.5049	20	18.9474
10.28	0.972763	0.580945	1.36901	1.06184	1.63502	1.66008	1.17939	2.13523	2.29075	2.18069	2.62646	2.26378	1.50376	2.74914	2.13964	3.08642	1.92166	1.21951	1.22378	0.95452	1.14167	1.32589	2.32877	1.23077	1.05088	1.40845	1.84366	0.852878	2.09895	2.23827	1.88206	1.43678	3.56671	1.37276	1.60256	2.13556	4.23529	22.2222	21.2121	14.8148	16.6667	16.3462	24.5283	18.3673	15.3846	14.6789	14.5631	16	18.9474
10.3	1.41051	0.774593	1.1201	1.62399	0.896624	1.50198	1.80012	1.86833	2.73128	2.02492	1.84825	2.65748	2.00501	1.97595	2.13964	2.62346	1.55211	1.91638	1.8648	1.23526	1.66061	1.18632	1.71233	1.69231	1.38274	0.960307	1.54867	1.22601	1.1994	1.73285	2.25847	2.10728	3.17041	2.42872	3.63248	1.94986	6.35294	14.1414	20.202	17.5926	16.6667	13.4615	15.0943	15.3061	17.3077	9.17431	16.5049	25	26.3158
10.32	1.21595	1.0457	1.24456	1.24922	0.738397	0.790514	1.8622	2.58007	2.64317	2.1028	2.91829	1.87008	1.8797	1.6323	3.49099	3.39506	2.21729	2.00348	1.45688	1.516	1.7644	1.39567	1.91781	1.23077	1.49336	1.60051	1.10619	1.17271	1.1994	1.87726	3.13676	3.06513	3.56671	2.42872	3.31197	2.22841	2.35294	15.1515	12.1212	13.8889	17.7083	13.4615	16.0377	21.4286	14.4231	15.5963	16.5049	21	17.8947
10.34	1.21595	0.774593	1.30678	1.24922	0.896624	2.13439	1.6139	2.75801	1.93833	2.41433	3.01556	3.05118	1.81704	2.74914	1.35135	3.54938	1.69993	1.48084	1.92308	1.40371	1.40114	1.32589	2.53425	0.820513	1.7146	1.08835	1.76991	0.959488	1.49925	1.58845	3.51317	1.91571	1.98151	2.74551	2.35043	2.32126	3.76471	15.1515	19.1919	19.4444	27.0833	19.2308	16.0377	13.2653	13.4615	16.5138	21.3592	19	25.2632
10.36	1.41051	0.697134	0.995644	1.18676	1.16034	1.34387	1.24146	2.75801	2.90749	2.41433	2.91829	2.55906	1.81704	1.71821	1.91441	4.32099	2.2912	2.09059	1.34033	0.842223	1.29735	2.30286	2.05479	0.923077	1.32743	1.15237	1.69617	0.799574	1.7991	1.58845	2.50941	2.20307	1.5852	1.26716	2.24359	1.39276	4.70588	19.1919	13.1313	12.963	10.4167	18.2692	12.2642	23.4694	16.3462	20.1835	17.4757	15	17.8947
10.38	1.55642	1.20062	1.18233	1.49906	1.26582	2.29249	1.92427	1.86833	2.11454	1.86916	2.43191	3.14961	1.81704	2.49141	2.81532	2.9321	1.69993	1.82927	1.34033	0.729927	1.29735	2.23308	1.9863	1.12821	1.21681	1.40845	2.13864	1.65245	2.17391	2.31047	2.133	2.68199	2.11361	2.74551	3.09829	1.76416	5.41176	24.2424	23.2323	17.5926	20.8333	15.3846	25.4717	17.3469	15.3846	25.6881	27.1845	23	22.1053
10.4	1.0214	0.968242	1.1201	1.62399	1.10759	2.37154	1.67598	1.15658	2.20264	2.49221	2.23735	2.46063	1.75439	1.54639	2.36486	3.54938	1.77384	1.82927	1.34033	1.40371	1.24546	1.74459	1.9863	1.07692	1.38274	1.60051	1.54867	1.17271	1.72414	1.66065	3.26223	1.81992	3.30251	2.00634	3.09829	1.85701	4.23529	34.3434	25.2525	13.8889	14.5833	19.2308	19.8113	17.3469	22.1154	18.3486	14.5631	19	14.7368
10.42	1.41051	0.852053	1.05787	1.74891	1.16034	1.66008	1.48976	1.69039	3.43612	1.94704	1.75097	2.46063	2.00501	2.92096	2.81532	3.39506	1.77384	2.61324	1.3986	1.34756	1.14167	1.25611	1.84932	0.923077	1.38274	1.79257	2.13864	1.97228	1.64918	1.94946	3.26223	2.58621	3.43461	2.21753	2.88462	2.32126	4.70588	30.303	25.2525	17.5926	15.625	16.3462	22.6415	19.3878	16.3462	16.5138	8.73786	29	15.7895
10.44	1.07004	0.813323	1.55569	0.811993	1.31857	1.58103	1.73805	2.31317	1.40969	1.55763	1.84825	1.67323	2.19298	1.80412	2.47748	3.08642	1.55211	1.74216	1.98135	1.68445	1.29735	1.25611	2.05479	1.12821	1.38274	1.40845	1.40118	1.0661	2.54873	1.80505	2.133	2.49042	2.50991	1.47835	2.35043	1.39276	4	17.1717	25.2525	13.8889	25	9.61538	9.43396	22.449	25	22.0183	15.534	22	20
10.46	1.31323	1.27808	1.49347	1.31168	1.05485	1.18577	1.98634	2.31317	2.73128	1.94704	1.55642	2.26378	1.94236	3.60825	1.91441	3.24074	1.99557	1.65505	1.28205	1.01067	1.60872	1.60502	2.46575	1.38462	1.38274	1.08835	2.35988	1.59915	2.09895	1.66065	2.88582	2.20307	1.98151	2.42872	2.67094	3.34262	5.17647	16.1616	29.2929	18.5185	20.8333	14.4231	12.2642	18.3673	19.2308	20.1835	20.3883	21	23.1579
10.48	1.07004	1.27808	1.18233	1.24922	1.00211	2.05534	1.92427	2.31317	1.4978	2.33645	2.14008	1.37795	1.4411	1.6323	1.91441	3.39506	1.62602	1.56794	1.10723	0.842223	0.934094	1.32589	3.21918	1.12821	1.54867	1.53649	2.0649	1.43923	2.17391	1.51625	3.76412	2.01149	2.90621	1.79514	2.02991	2.22841	5.88235	12.1212	17.1717	13.8889	20.8333	12.5	24.5283	25.5102	21.1538	27.5229	22.3301	18	14.7368
10.5	1.11868	0.503486	1.05787	1.93629	1.00211	1.89723	0.993172	2.31317	2.02643	2.33645	2.43191	2.55906	1.75439	1.6323	2.81532	3.24074	1.55211	1.30662	1.22378	0.842223	1.03788	1.39567	2.26027	1.74359	1.10619	1.40845	1.62242	0.959488	1.27436	1.37184	2.133	1.81992	2.11361	1.79514	1.92308	1.67131	4.23529	14.1414	18.1818	21.2963	18.75	24.0385	20.7547	25.5102	17.3077	16.5138	13.5922	12	21.0526
10.52	1.50778	0.890782	1.36901	1.4366	1.31857	1.81818	1.42768	2.93594	1.5859	2.25857	2.72374	2.3622	1.75439	2.31959	3.71622	2.77778	2.14339	1.82927	1.34033	1.29141	1.34925	1.67481	2.19178	1.38462	1.27212	1.15237	1.99115	0.959488	2.62369	1.58845	2.88582	2.29885	2.24571	1.90074	2.24359	2.50696	2.11765	10.101	17.1717	20.3704	21.875	17.3077	11.3208	15.3061	13.4615	11.0092	12.6214	19	20
10.54	1.0214	0.890782	1.49347	0.811993	1.05485	1.02767	1.42768	2.13523	2.29075	1.63551	2.23735	2.65748	1.81704	2.31959	2.13964	2.62346	1.69993	1.65505	1.34033	1.23526	1.08978	1.74459	1.9863	1.07692	0.995575	1.98464	1.84366	1.1194	1.7991	1.73285	4.01506	2.58621	1.71731	2.32313	2.88462	2.69266	4.47059	16.1616	20.202	9.25926	17.7083	11.5385	18.8679	18.3673	16.3462	14.6789	12.6214	18	20
10.56	1.0214	0.697134	1.61792	1.74891	0.580169	2.45059	1.42768	2.04626	1.93833	2.18069	2.43191	2.55906	1.50376	2.23368	2.36486	2.9321	1.33038	1.65505	1.57343	1.01067	1.45304	1.88416	3.21918	0.871795	0.995575	1.34443	1.76991	1.27932	1.72414	1.51625	1.88206	1.91571	1.321	2.42872	2.24359	2.50696	4.94118	19.1919	9.09091	18.5185	18.75	10.5769	23.5849	18.3673	15.3846	22.9358	13.5922	13	9.47368
10.58	0.972763	0.735864	0.995644	1.06184	1.31857	1.66008	1.36561	1.86833	1.93833	2.25857	1.94553	2.46063	1.75439	3.2646	3.26577	4.01235	2.06948	2.09059	0.757576	1.34756	1.45304	1.74459	2.26027	1.33333	1.7146	1.34443	1.32743	1.1194	2.02399	2.02166	3.51317	2.10728	2.64201	2.53432	2.13675	1.39276	2.82353	17.1717	17.1717	22.2222	22.9167	10.5769	13.2075	14.2857	14.4231	7.33945	23.301	21	24.2105
10.6	1.16732	0.852053	1.24456	1.56152	1.26582	1.73913	1.36561	2.58007	1.76211	1.40187	2.91829	2.46063	1.69173	1.97595	3.15315	3.54938	1.4782	2.43902	1.6317	1.34756	1.14167	1.18632	2.26027	0.666667	0.995575	1.72855	1.84366	1.38593	2.09895	1.15523	3.13676	1.91571	1.71731	2.21753	2.45726	1.48561	4.94118	17.1717	20.202	18.5185	17.7083	10.5769	18.8679	19.3878	13.4615	12.844	18.4466	14	20
10.62	0.875486	0.735864	1.61792	2.18613	1.16034	2.45059	1.11732	2.13523	2.11454	1.7134	1.94553	2.16535	1.75439	2.06186	1.68919	4.16667	0.739098	2.09059	1.45688	0.95452	1.03788	1.11654	2.19178	1.48718	0.884956	1.53649	1.76991	1.0661	2.09895	1.29964	2.133	1.91571	2.37781	1.90074	2.99145	2.69266	4.94118	15.1515	18.1818	13.8889	17.7083	17.3077	16.9811	18.3673	13.4615	20.1835	17.4757	13	18.9474
10.64	1.45914	0.890782	1.68015	1.18676	1.05485	1.50198	1.36561	2.58007	2.29075	2.1028	1.75097	2.06693	1.81704	1.80412	2.36486	2.62346	2.2912	1.21951	1.34033	1.6283	1.50493	1.88416	2.60274	1.23077	0.884956	1.40845	1.99115	1.33262	1.7991	1.44404	2.76035	2.49042	1.4531	3.1679	2.67094	2.32126	4.23529	20.202	12.1212	15.7407	15.625	15.3846	13.2075	16.3265	23.0769	19.2661	16.5049	18	21.0526
10.66	0.924125	0.697134	0.995644	1.62399	1.00211	2.29249	1.42768	2.2242	2.64317	1.79128	2.62646	2.75591	1.69173	1.71821	2.92793	4.01235	1.77384	1.39373	0.990676	0.842223	0.8822	1.81438	2.26027	1.33333	0.940265	1.85659	1.03245	1.1194	2.32384	1.51625	1.88206	2.87356	2.24571	1.90074	3.31197	2.32126	3.52941	16.1616	22.2222	24.0741	16.6667	23.0769	16.0377	15.3061	14.4231	19.2661	17.4757	20	15.7895
10.68	0.972763	0.890782	0.995644	1.24922	1.05485	1.18577	1.6139	2.4911	2.90749	2.25857	2.0428	2.26378	1.50376	1.89003	2.47748	1.85185	1.40429	1.56794	1.6317	1.85289	1.34925	1.39567	1.78082	1.07692	0.884956	1.72855	1.84366	1.43923	1.72414	1.22744	2.133	2.49042	2.37781	1.68955	2.45726	2.04271	6.35294	12.1212	16.1616	11.1111	28.125	19.2308	18.8679	17.3469	16.3462	18.3486	17.4757	17	14.7368
10.7	1.26459	0.774593	1.18233	1.18676	1.52954	1.89723	1.05525	2.40214	1.32159	1.40187	1.26459	2.75591	1.75439	2.23368	3.37838	4.01235	1.33038	2.00348	1.80653	1.01067	0.985989	2.09351	2.32877	0.923077	0.774336	1.53649	1.9174	0.692964	1.57421	1.58845	2.133	1.53257	1.5852	1.26716	2.13675	1.39276	4.70588	18.1818	22.2222	16.6667	17.7083	17.3077	15.0943	16.3265	11.5385	12.844	12.6214	13	21.0526
10.72	0.875486	0.658404	1.18233	1.62399	1.26582	0.948617	1.30354	2.04626	2.90749	2.02492	2.14008	2.26378	1.31579	1.54639	2.36486	3.24074	1.92166	2.00348	1.80653	0.786075	1.14167	1.74459	2.53425	1.12821	0.719027	1.21639	1.62242	1.22601	1.94903	2.02166	3.51317	1.72414	1.1889	2.21753	2.67094	1.85701	4.94118	13.1313	28.2828	20.3704	25	16.3462	18.8679	19.3878	17.3077	16.5138	20.3883	20	16.8421
10.74	0.875486	0.580945	1.36901	1.56152	1.10759	2.29249	1.11732	2.2242	2.02643	2.72586	2.52918	2.55906	1.94236	2.57732	2.7027	2.16049	1.55211	1.74216	1.10723	0.898372	1.19357	1.39567	1.78082	1.07692	1.21681	0.960307	1.84366	1.33262	1.87406	2.02166	2.00753	2.49042	2.90621	2.53432	2.24359	1.76416	4	20.202	8.08081	12.037	28.125	13.4615	12.2642	15.3061	21.1538	16.5138	22.3301	13	23.1579
10.76	1.21595	0.619675	1.24456	1.18676	0.791139	1.10672	1.30354	2.31317	2.11454	1.32399	2.82101	2.85433	1.4411	1.89003	2.13964	3.85802	1.84775	2.09059	0.990676	1.01067	1.45304	1.53524	2.19178	1.4359	0.995575	0.960307	1.76991	1.17271	1.42429	1.80505	2.38394	2.29885	2.64201	2.42872	2.24359	2.04271	2.82353	16.1616	16.1616	16.6667	25	23.0769	11.3208	18.3673	20.1923	10.0917	10.6796	18	29.4737
10.78	1.11868	0.697134	0.995644	1.18676	0.949367	1.26482	1.17939	2.58007	1.76211	1.55763	1.94553	2.55906	1.81704	2.23368	1.57658	2.9321	1.77384	1.82927	0.815851	1.29141	1.19357	1.39567	2.53425	1.02564	1.49336	0.896287	1.76991	0.959488	1.1994	1.08303	3.13676	2.39464	2.90621	1.79514	1.81624	1.76416	5.64706	16.1616	15.1515	19.4444	16.6667	14.4231	13.2075	19.3878	18.2692	10.0917	7.76699	13	16.8421
10.8	1.07004	0.387297	1.30678	1.4366	0.791139	1.10672	1.36561	2.13523	1.85022	1.86916	1.6537	2.3622	1.69173	2.31959	2.25225	3.54938	2.21729	1.48084	1.45688	1.79674	1.08978	1.60502	2.05479	1.28205	1.49336	1.47247	1.99115	0.959488	1.1994	1.94946	3.01129	2.01149	1.98151	1.68955	1.81624	0.928505	4.70588	24.2424	17.1717	19.4444	20.8333	9.61538	17.9245	24.4898	16.3462	18.3486	17.4757	29	16.8421
10.82	0.924125	0.309837	1.05787	1.31168	1.26582	1.89723	1.36561	1.51246	2.46696	2.25857	2.23735	2.16535	1.31579	2.14777	1.91441	3.08642	1.99557	1.91638	1.8648	1.516	0.8822	1.88416	2.19178	0.923077	1.1615	1.21639	1.69617	1.0661	2.47376	2.02166	2.50941	1.81992	2.37781	1.68955	1.92308	1.67131	3.05882	18.1818	15.1515	21.2963	18.75	21.1538	14.1509	17.3469	20.1923	11.9266	14.5631	15	22.1053
10.84	1.21595	0.968242	1.43124	1.37414	1.31857	1.89723	1.80012	3.11388	2.46696	2.33645	2.14008	2.65748	1.94236	1.97595	1.57658	2.31481	1.92166	1.91638	1.28205	0.95452	1.29735	1.32589	2.12329	1.28205	0.884956	1.66453	1.32743	1.01279	1.49925	1.87726	2.133	1.81992	2.90621	2.32313	2.35043	2.13556	2.35294	21.2121	18.1818	19.4444	19.7917	21.1538	9.43396	11.2245	14.4231	11.0092	15.534	23	11.5789
10.86	1.0214	0.697134	1.36901	1.18676	1.47679	1.18577	1.73805	1.77936	2.46696	2.18069	1.84825	1.08268	1.00251	1.80412	2.81532	2.31481	1.18256	1.91638	0.990676	1.01067	0.8822	1.04676	2.12329	1.17949	1.05088	1.72855	1.17994	1.17271	1.49925	1.51625	2.88582	2.10728	2.24571	2.00634	2.24359	1.67131	4.23529	17.1717	26.2626	21.2963	21.875	20.1923	21.6981	19.3878	17.3077	18.3486	16.5049	18	27.3684
10.88	0.972763	0.813323	1.30678	1.1243	1.00211	1.58103	1.55183	2.04626	2.11454	1.7134	2.43191	1.77165	2.00501	1.46048	2.36486	2.9321	2.2912	1.48084	1.1655	1.17911	0.830306	1.25611	3.08219	0.717949	0.940265	1.66453	1.25369	0.692964	1.94903	1.22744	3.3877	2.01149	2.50991	1.90074	2.13675	1.94986	4.23529	14.1414	24.2424	18.5185	13.5417	12.5	13.2075	20.4082	22.1154	18.3486	11.6505	18	18.9474
10.9	0.972763	0.929512	1.61792	1.99875	0.896624	1.18577	1.24146	1.69039	1.4978	1.63551	1.75097	2.16535	1.94236	1.6323	2.02703	3.7037	1.40429	3.223	1.45688	0.786075	0.726518	1.53524	2.26027	1.17949	1.10619	1.28041	1.47493	0.852878	1.34933	1.66065	2.76035	2.49042	2.37781	2.53432	2.02991	2.41411	6.11765	20.202	10.101	24.0741	21.875	16.3462	10.3774	12.2449	12.5	8.25688	17.4757	17	21.0526
10.92	1.16732	0.774593	1.1201	1.81137	1.00211	1.73913	1.30354	2.40214	2.20264	1.55763	2.23735	2.46063	1.94236	1.6323	1.91441	2.62346	1.18256	3.3101	1.6317	1.516	1.50493	1.60502	2.12329	1.28205	1.27212	1.47247	1.40118	0.692964	2.02399	2.31047	1.63112	1.91571	2.24571	2.21753	1.92308	2.32126	4.70588	21.2121	23.2323	16.6667	14.5833	10.5769	14.1509	18.3673	18.2692	11.0092	15.534	23	23.1579
10.94	1.21595	0.697134	1.43124	0.999375	1.05485	1.97628	1.11732	2.31317	2.55507	2.18069	2.43191	1.27953	1.00251	1.71821	1.35135	2.00617	1.55211	1.82927	1.22378	1.17911	0.830306	1.25611	2.12329	1.33333	1.1615	1.34443	2.0649	1.43923	1.1994	1.51625	2.25847	2.68199	2.37781	2.00634	3.63248	1.85701	3.76471	16.1616	14.1414	13.8889	22.9167	24.0385	18.8679	18.3673	12.5	19.2661	19.4175	15	21.0526
10.96	1.16732	0.813323	1.61792	1.62399	1.05485	2.29249	1.80012	3.20285	3.0837	1.94704	3.01556	2.75591	1.00251	2.31959	2.59009	2.77778	1.55211	2.00348	0.990676	0.729927	1.24546	1.81438	2.32877	1.02564	0.719027	1.60051	1.84366	1.22601	2.09895	1.80505	1.38018	2.29885	2.37781	1.68955	3.4188	1.67131	4.47059	16.1616	25.2525	25.9259	25	15.3846	19.8113	22.449	17.3077	15.5963	16.5049	17	17.8947
10.98	0.924125	0.813323	0.933416	1.37414	0.685654	2.13439	2.11049	2.04626	1.76211	2.1028	2.72374	2.46063	1.37845	1.71821	1.91441	3.7037	1.10865	1.48084	1.04895	1.40371	0.934094	1.53524	1.91781	1.12821	0.829646	1.47247	1.84366	0.852878	1.7991	2.16606	1.50565	2.01149	2.90621	1.68955	1.38889	1.20706	4.23529	19.1919	16.1616	13.8889	15.625	21.1538	10.3774	18.3673	17.3077	18.3486	12.6214	18	18.9474
11	0.924125	0.929512	1.55569	1.37414	1.52954	1.18577	1.42768	2.04626	2.81938	2.49221	2.33463	2.06693	1.25313	2.14777	2.81532	1.85185	2.14339	2.78746	1.34033	1.17911	0.830306	1.88416	2.53425	0.923077	1.32743	1.40845	1.25369	1.43923	1.87406	1.58845	3.01129	3.35249	2.37781	1.79514	2.24359	2.50696	5.41176	15.1515	18.1818	10.1852	19.7917	14.4231	15.0943	10.2041	20.1923	16.5138	15.534	17	17.8947
11.02	1.11868	0.542215	1.24456	1.56152	0.738397	1.02767	1.05525	2.58007	2.02643	2.88162	2.0428	2.06693	1.75439	2.23368	3.37838	2.9321	1.4782	1.56794	1.34033	1.29141	0.934094	1.32589	2.39726	1.28205	0.995575	1.21639	1.47493	1.33262	2.17391	1.80505	3.01129	2.58621	1.98151	1.26716	2.02991	2.13556	4.94118	12.1212	22.2222	14.8148	25	15.3846	18.8679	20.4082	14.4231	16.5138	13.5922	13	17.8947
11.04	0.924125	0.813323	1.18233	1.37414	0.843882	1.58103	1.42768	1.42349	2.20264	2.72586	1.55642	1.67323	1.81704	1.89003	2.81532	4.16667	1.25647	1.91638	2.15618	1.23526	0.934094	2.16329	2.53425	1.23077	0.829646	1.15237	1.76991	1.0661	2.32384	1.29964	2.00753	2.29885	2.77411	1.68955	2.5641	2.13556	3.29412	9.09091	17.1717	21.2963	18.75	10.5769	14.1509	18.3673	24.0385	14.6789	11.6505	18	17.8947
11.06	0.875486	0.813323	1.05787	1.1243	1.10759	2.45059	1.24146	1.86833	2.20264	1.55763	2.52918	1.67323	1.4411	1.89003	2.36486	4.16667	1.69993	3.04878	1.1655	1.34756	0.985989	1.67481	2.39726	1.12821	1.21681	1.40845	1.54867	0.692964	1.27436	1.94946	2.38394	2.49042	1.84941	3.59029	1.92308	1.85701	5.41176	21.2121	17.1717	13.8889	15.625	20.1923	15.0943	25.5102	11.5385	13.7615	18.4466	17	20
11.08	0.826848	0.968242	1.18233	1.4366	0.685654	1.66008	0.806952	2.75801	1.93833	1.94704	1.75097	1.87008	2.00501	1.6323	2.13964	3.24074	1.55211	1.48084	1.34033	1.57215	0.830306	2.02373	1.30137	1.38462	0.940265	1.40845	1.32743	1.01279	1.7991	1.37184	1.50565	1.43678	3.03831	2.32313	2.02991	2.22841	4.94118	14.1414	16.1616	9.25926	17.7083	11.5385	16.9811	14.2857	17.3077	12.844	12.6214	18	22.1053
11.1	1.07004	0.813323	1.24456	1.37414	0.738397	2.13439	0.869025	2.93594	2.11454	1.55763	1.36187	1.5748	1.75439	2.4055	2.47748	1.23457	1.33038	2.26481	1.10723	0.95452	0.934094	1.25611	2.46575	1.17949	1.1615	1.72855	1.40118	1.49254	2.17391	0.938628	2.38394	1.81992	2.50991	1.37276	3.52564	1.76416	4.47059	9.09091	23.2323	11.1111	16.6667	17.3077	16.9811	22.449	25	18.3486	14.5631	20	16.8421
11.12	1.11868	0.542215	1.74238	1.68645	0.685654	1.26482	1.24146	2.2242	1.76211	1.94704	2.52918	2.85433	1.56642	2.14777	2.47748	3.54938	1.62602	2.26481	0.990676	1.01067	0.8822	1.81438	2.67123	1.74359	1.05088	1.28041	1.25369	1.01279	1.49925	1.66065	2.50941	1.43678	2.50991	1.58395	2.45726	1.67131	4.47059	18.1818	18.1818	24.0741	28.125	18.2692	16.9811	26.5306	17.3077	18.3486	15.534	21	13.6842
11.14	1.26459	0.658404	1.55569	2.06121	1.16034	1.58103	1.36561	1.86833	2.64317	1.86916	2.62646	1.67323	2.06767	2.83505	2.25225	1.69753	1.62602	1.82927	1.34033	1.29141	1.34925	1.95394	2.53425	1.23077	1.21681	1.66453	1.47493	1.22601	1.64918	2.31047	3.01129	2.29885	1.5852	1.58395	2.88462	1.85701	5.64706	16.1616	17.1717	13.8889	21.875	18.2692	14.1509	15.3061	22.1154	19.2661	16.5049	17	28.4211
11.16	0.729572	0.813323	1.18233	1.81137	1.00211	1.34387	1.67598	1.33452	2.29075	1.86916	2.0428	1.27953	1.75439	2.49141	1.68919	2.77778	2.14339	1.56794	1.04895	0.95452	1.14167	1.60502	2.32877	1.12821	0.940265	1.40845	1.62242	1.22601	1.42429	1.08303	2.88582	1.62835	2.11361	2.00634	2.13675	1.94986	3.76471	16.1616	15.1515	17.5926	23.9583	9.61538	16.9811	20.4082	23.0769	13.7615	16.5049	17	14.7368
11.18	1.16732	0.890782	1.30678	1.56152	0.896624	1.58103	1.73805	2.75801	2.55507	2.41433	2.62646	1.27953	1.56642	2.92096	1.91441	3.54938	2.06948	2.1777	1.1655	1.06682	1.24546	1.53524	2.05479	1.33333	0.995575	1.08835	1.76991	0.959488	1.87406	1.15523	1.75659	2.39464	3.03831	2.32313	1.7094	2.22841	4.23529	15.1515	20.202	15.7407	15.625	22.1154	21.6981	14.2857	15.3846	11.0092	13.5922	18	13.6842
11.2	0.972763	0.619675	1.1201	1.62399	0.685654	1.42292	1.36561	2.31317	1.67401	1.94704	1.94553	1.9685	1.06516	1.80412	2.25225	3.08642	1.4782	2.52613	0.815851	1.57215	1.29735	1.25611	2.87671	0.923077	1.1615	1.40845	1.62242	1.49254	1.94903	1.66065	2.133	2.01149	2.37781	2.32313	1.81624	2.22841	4.23529	19.1919	22.2222	13.8889	20.8333	18.2692	16.0377	17.3469	17.3077	17.4312	17.4757	15	9.47368
11.22	1.07004	0.929512	0.808961	1.24922	1.26582	2.13439	1.05525	2.13523	3.0837	2.57009	1.94553	1.87008	2.00501	2.06186	2.47748	3.85802	0.960828	1.82927	0.815851	0.617631	1.08978	1.60502	1.64384	2.15385	1.54867	1.08835	1.84366	1.81237	1.64918	1.58845	2.133	2.77778	2.37781	3.1679	2.02991	1.48561	3.05882	18.1818	25.2525	12.037	14.5833	14.4231	26.4151	21.4286	16.3462	12.844	11.6505	18	13.6842
11.24	1.0214	0.813323	1.05787	1.37414	1.21308	1.97628	1.05525	2.40214	2.29075	2.72586	1.94553	3.14961	1.62907	2.4055	2.13964	3.7037	1.92166	1.91638	1.22378	0.673779	1.45304	0.907188	3.0137	1.23077	0.829646	1.85659	0.663717	1.01279	1.7991	1.58845	2.88582	2.29885	2.24571	2.00634	1.92308	1.29991	4.94118	15.1515	19.1919	10.1852	19.7917	12.5	9.43396	17.3469	11.5385	10.0917	22.3301	20	20
11.26	1.31323	1.12316	1.18233	1.49906	0.843882	1.42292	1.6139	1.9573	1.93833	1.55763	3.21012	2.3622	1.4411	1.28866	2.7027	2.31481	1.4782	1.56794	1.28205	0.95452	1.08978	1.39567	2.39726	1.17949	1.38274	1.72855	1.62242	1.0661	1.7991	1.51625	3.01129	1.81992	2.90621	1.79514	3.09829	1.48561	4	12.1212	14.1414	12.963	19.7917	17.3077	16.9811	21.4286	8.65385	15.5963	23.301	19	21.0526
11.28	1.0214	0.774593	1.05787	1.81137	1.26582	1.42292	1.17939	2.31317	2.11454	1.94704	2.43191	2.55906	1.8797	1.97595	3.26577	2.62346	1.33038	1.74216	1.1655	1.34756	1.50493	1.25611	2.87671	0.974359	1.10619	1.02433	1.40118	1.49254	1.7991	1.87726	2.38394	2.68199	2.37781	3.1679	2.02991	2.22841	5.64706	19.1919	17.1717	11.1111	16.6667	17.3077	16.0377	15.3061	13.4615	12.844	13.5922	15	14.7368
11.3	1.21595	0.619675	1.24456	1.56152	0.738397	1.81818	1.42768	2.58007	2.20264	2.41433	3.59922	1.77165	1.56642	1.80412	3.04054	3.08642	1.4782	2.35192	0.990676	1.45985	0.726518	1.88416	1.71233	0.769231	0.719027	1.40845	1.62242	1.49254	0.974513	1.87726	3.26223	3.16092	1.98151	2.85111	2.24359	1.94986	5.88235	17.1717	14.1414	18.5185	20.8333	11.5385	16.0377	20.4082	14.4231	11.0092	15.534	17	21.0526
11.32	1.75097	0.852053	1.36901	1.56152	1.52954	1.89723	1.55183	2.04626	1.93833	1.86916	3.6965	2.75591	1.62907	2.83505	2.81532	2.62346	1.4782	1.65505	0.874126	1.40371	1.03788	1.39567	2.60274	1.28205	1.21681	1.08835	2.13864	1.27932	1.57421	1.44404	2.38394	2.49042	1.71731	2.53432	2.77778	2.22841	5.17647	13.1313	10.101	19.4444	26.0417	12.5	19.8113	19.3878	15.3846	11.9266	11.6505	19	17.8947
11.34	1.31323	0.348567	0.56005	0.936914	0.949367	1.34387	1.42768	1.42349	2.02643	1.63551	1.45914	1.5748	1.31579	2.49141	1.57658	4.01235	1.40429	1.1324	0.932401	1.12296	0.985989	1.39567	1.57534	1.17949	1.43805	1.85659	2.21239	0.959488	1.64918	1.08303	3.76412	2.49042	1.71731	1.26716	2.35043	1.85701	4.70588	15.1515	24.2424	13.8889	21.875	11.5385	16.0377	22.449	19.2308	11.9266	15.534	22	14.7368
11.36	0.729572	0.697134	1.43124	1.24922	1.00211	1.73913	0.993172	2.31317	1.76211	2.02492	2.43191	2.75591	1.62907	1.97595	3.04054	2.31481	1.4782	1.39373	1.1655	1.12296	1.14167	1.39567	1.57534	1.02564	1.32743	1.15237	1.32743	1.38593	1.27436	1.51625	3.13676	1.91571	2.50991	3.0623	2.24359	1.57846	4.23529	20.202	11.1111	17.5926	25	16.3462	16.0377	17.3469	11.5385	22.9358	15.534	15	21.0526
11.38	1.0214	0.852053	2.17797	1.06184	1.21308	1.34387	1.48976	1.33452	2.20264	1.63551	1.55642	2.55906	1.56642	2.66323	2.13964	3.85802	1.4782	2.96167	1.04895	1.06682	1.08978	1.11654	1.84932	1.23077	0.608407	1.08835	1.47493	1.17271	2.69865	1.58845	2.25847	1.91571	2.37781	2.00634	1.60256	2.32126	4.47059	15.1515	19.1919	16.6667	21.875	15.3846	17.9245	17.3469	14.4231	16.5138	12.6214	12	13.6842
11.4	0.826848	0.735864	1.18233	1.74891	0.685654	1.58103	1.17939	2.4911	2.20264	1.79128	1.6537	1.87008	1.25313	1.80412	2.36486	3.08642	1.33038	1.48084	1.74825	1.12296	0.934094	1.60502	1.84932	0.974359	1.10619	1.47247	1.32743	1.43923	2.02399	1.37184	2.133	2.10728	1.98151	1.47835	2.13675	1.57846	3.29412	16.1616	23.2323	13.8889	23.9583	11.5385	15.0943	16.3265	19.2308	11.0092	23.301	20	23.1579
11.42	1.21595	0.813323	1.36901	1.06184	0.791139	1.66008	1.30354	2.4911	2.11454	1.7134	1.6537	2.46063	1.19048	1.03093	1.91441	2.62346	1.84775	2.35192	0.990676	1.12296	1.60872	1.67481	2.53425	1.17949	1.49336	1.72855	1.54867	1.01279	1.72414	2.09386	1.25471	1.53257	3.03831	2.42872	2.24359	1.94986	3.29412	14.1414	17.1717	22.2222	20.8333	19.2308	11.3208	18.3673	12.5	12.844	10.6796	23	15.7895
11.44	0.826848	0.697134	1.1201	1.49906	1.42405	1.58103	1.73805	1.77936	1.76211	2.18069	2.23735	2.06693	1.37845	2.06186	2.13964	2.9321	1.55211	2.70035	1.22378	1.01067	1.50493	1.32589	1.84932	1.02564	0.995575	1.34443	1.76991	1.01279	1.64918	1.87726	2.38394	2.29885	1.98151	2.42872	2.77778	2.41411	4	13.1313	20.202	16.6667	14.5833	14.4231	14.1509	22.449	12.5	22.0183	16.5049	16	15.7895
11.46	1.16732	0.890782	1.05787	1.18676	0.791139	2.29249	1.36561	2.31317	1.67401	1.47975	2.33463	2.16535	2.19298	1.71821	2.59009	5.55556	1.18256	1.65505	1.28205	1.29141	0.570835	1.18632	3.49315	1.48718	1.1615	0.832266	1.10619	1.17271	1.57421	1.29964	2.133	1.81992	2.77411	2.42872	2.24359	2.41411	4	10.101	15.1515	10.1852	17.7083	14.4231	16.0377	15.3061	20.1923	11.0092	19.4175	19	16.8421
11.48	1.0214	0.697134	1.49347	1.74891	1.00211	1.26482	1.6139	1.9573	1.93833	1.86916	2.43191	3.05118	1.62907	2.66323	2.13964	1.69753	0.591279	1.48084	1.68998	0.898372	0.985989	1.60502	3.76712	1.17949	1.43805	0.896287	1.84366	1.22601	2.02399	1.66065	2.88582	1.53257	1.98151	2.32313	1.81624	2.59981	4.70588	19.1919	14.1414	23.1481	15.625	12.5	13.2075	17.3469	15.3846	13.7615	26.2136	15	17.8947
11.5	1.16732	0.542215	1.30678	1.74891	1.21308	1.34387	1.17939	2.04626	1.93833	2.02492	3.30739	1.37795	2.00501	3.09278	2.13964	2.62346	1.62602	2.43902	1.34033	0.617631	1.14167	1.67481	2.19178	0.666667	0.940265	1.60051	1.69617	1.22601	1.7991	1.44404	2.38394	2.29885	2.77411	1.79514	2.02991	2.04271	5.41176	19.1919	17.1717	11.1111	17.7083	18.2692	12.2642	18.3673	12.5	17.4312	14.5631	16	20
11.52	0.972763	0.852053	1.05787	1.37414	0.949367	1.02767	0.806952	2.4911	2.55507	1.63551	2.23735	2.26378	1.94236	1.37457	2.13964	2.9321	1.33038	1.30662	1.04895	0.898372	0.985989	1.53524	2.60274	1.4359	0.940265	1.47247	1.69617	1.49254	1.87406	1.22744	2.133	2.20307	1.71731	2.85111	1.7094	1.29991	4	16.1616	25.2525	12.963	17.7083	13.4615	10.3774	15.3061	14.4231	14.6789	14.5631	22	13.6842
11.54	1.07004	0.619675	0.995644	1.49906	1.00211	1.73913	1.30354	1.60142	2.37885	1.32399	3.11284	2.46063	1.81704	1.28866	2.36486	3.39506	1.55211	1.74216	1.3986	1.12296	1.14167	1.46546	1.71233	1.17949	0.719027	1.40845	1.62242	1.0661	1.7991	2.23827	2.00753	2.01149	1.1889	2.00634	2.5641	2.22841	4.94118	17.1717	20.202	22.2222	12.5	20.1923	16.9811	29.5918	13.4615	10.0917	13.5922	26	21.0526
11.56	1.11868	0.890782	1.43124	1.24922	1.42405	1.42292	1.24146	2.31317	2.64317	2.64798	1.45914	1.9685	1.37845	2.23368	2.7027	2.77778	1.62602	2.26481	0.932401	1.01067	1.24546	1.46546	2.60274	1.4359	0.829646	1.02433	1.32743	1.54584	2.02399	1.44404	1.25471	2.39464	1.84941	1.47835	2.35043	1.76416	4	16.1616	13.1313	12.963	25	13.4615	16.9811	10.2041	20.1923	14.6789	14.5631	12	14.7368
11.58	0.680934	0.813323	1.49347	1.37414	0.843882	2.29249	1.55183	1.77936	1.5859	1.86916	1.84825	2.3622	2.06767	2.74914	2.81532	3.7037	1.92166	2.26481	1.45688	1.12296	1.24546	1.25611	2.67123	1.12821	1.10619	1.15237	1.76991	0.906183	2.17391	1.94946	1.88206	2.39464	1.5852	2.32313	1.17521	1.94986	5.17647	12.1212	18.1818	12.037	14.5833	15.3846	18.8679	17.3469	16.3462	13.7615	13.5922	21	12.6316
11.6	0.583658	0.852053	1.24456	1.1243	0.843882	0.790514	1.67598	2.13523	2.55507	2.25857	1.55642	1.37795	1.69173	2.14777	2.13964	2.77778	1.92166	2.35192	1.22378	0.95452	0.674624	1.88416	3.0137	1.07692	0.663717	0.896287	2.13864	0.906183	1.42429	2.38267	2.38394	2.49042	2.64201	1.90074	2.77778	1.76416	4.70588	22.2222	15.1515	14.8148	14.5833	15.3846	22.6415	12.2449	18.2692	23.8532	15.534	17	20
11.62	0.826848	0.697134	1.05787	1.4366	0.738397	1.81818	1.73805	2.4911	1.4978	2.57009	2.91829	2.3622	1.94236	2.14777	2.47748	2.9321	2.21729	2.52613	0.932401	1.12296	1.03788	1.53524	2.12329	0.871795	0.995575	1.60051	1.40118	1.17271	1.7991	2.16606	1.00376	2.01149	2.11361	2.32313	1.92308	2.04271	3.29412	17.1717	17.1717	25	19.7917	12.5	19.8113	15.3061	17.3077	16.5138	17.4757	27	20
11.64	1.07004	0.735864	0.808961	0.999375	1.00211	1.26482	1.6139	1.9573	2.81938	1.24611	1.6537	2.16535	2.06767	1.89003	2.7027	2.77778	1.4782	1.74216	0.815851	0.729927	1.03788	1.04676	2.26027	1.12821	1.1615	1.53649	1.62242	1.0661	1.57421	2.38267	3.13676	2.58621	1.84941	1.68955	2.5641	2.41411	1.64706	11.1111	22.2222	10.1852	20.8333	16.3462	16.0377	16.3265	8.65385	18.3486	9.70874	14	16.8421
11.66	0.826848	0.658404	1.30678	1.18676	1.42405	1.66008	1.17939	1.33452	2.73128	2.02492	2.72374	1.87008	1.56642	1.6323	2.25225	2.31481	1.55211	2.00348	0.815851	0.95452	1.14167	1.95394	2.53425	0.974359	1.32743	1.40845	1.84366	1.17271	1.87406	1.94946	2.63488	2.01149	2.11361	2.42872	2.13675	1.39276	5.17647	22.2222	18.1818	7.40741	16.6667	18.2692	8.49057	15.3061	14.4231	10.0917	14.5631	18	15.7895
11.68	0.924125	0.852053	1.49347	1.4366	0.791139	1.34387	1.05525	2.31317	2.99559	2.18069	1.94553	2.16535	1.75439	1.28866	1.57658	3.54938	1.40429	2.26481	1.22378	1.34756	1.08978	1.25611	2.39726	0.871795	1.27212	1.34443	1.62242	1.1194	1.34933	1.44404	1.88206	1.91571	2.11361	1.37276	2.35043	2.22841	4	16.1616	13.1313	11.1111	15.625	23.0769	18.8679	13.2653	14.4231	13.7615	16.5049	16	15.7895
11.7	0.632296	0.852053	1.49347	1.49906	1.31857	2.05534	1.8622	2.13523	1.76211	1.94704	1.75097	2.26378	2.00501	1.80412	2.02703	2.9321	1.69993	2.09059	0.990676	0.898372	0.830306	1.53524	2.53425	1.23077	1.32743	1.40845	1.40118	0.852878	1.94903	2.02166	2.76035	1.72414	1.5852	2.32313	2.67094	1.85701	5.17647	12.1212	18.1818	21.2963	29.1667	16.3462	13.2075	17.3469	18.2692	11.9266	11.6505	8	14.7368
11.72	1.16732	0.658404	1.74238	1.56152	1.37131	1.26482	1.67598	2.58007	2.02643	2.1028	1.84825	1.9685	2.06767	1.54639	2.47748	3.24074	1.4782	1.56794	1.28205	1.34756	1.03788	0.976971	2.19178	1.33333	0.940265	1.53649	1.54867	1.1194	1.42429	1.22744	2.133	1.81992	2.11361	2.00634	2.13675	1.57846	4.23529	24.2424	9.09091	14.8148	16.6667	14.4231	18.8679	17.3469	10.5769	19.2661	8.73786	18	26.3158
11.74	0.77821	0.813323	1.61792	1.31168	1.58228	1.73913	1.42768	2.4911	2.20264	1.01246	2.62646	2.06693	1.50376	2.14777	1.91441	3.24074	1.84775	1.91638	1.28205	0.898372	0.778412	1.95394	2.05479	0.923077	0.884956	1.15237	2.0649	0.799574	2.3988	1.08303	2.25847	1.62835	3.43461	1.26716	2.13675	1.85701	4.94118	12.1212	17.1717	15.7407	17.7083	18.2692	14.1509	9.18367	15.3846	15.5963	8.73786	31	14.7368
11.76	0.924125	0.852053	1.1201	1.24922	0.843882	1.66008	1.36561	1.51246	2.20264	2.33645	1.84825	2.16535	1.94236	1.89003	3.15315	3.39506	1.25647	1.56794	1.92308	0.95452	1.19357	1.53524	2.12329	1.17949	0.663717	1.47247	1.69617	1.33262	1.72414	2.09386	2.63488	2.10728	1.84941	1.79514	1.17521	1.67131	5.17647	13.1313	29.2929	14.8148	14.5833	22.1154	14.1509	14.2857	16.3462	11.0092	21.3592	17	9.47368
11.78	1.16732	0.542215	0.871189	1.74891	0.896624	1.42292	1.30354	2.2242	2.90749	2.18069	1.84825	2.46063	1.8797	2.57732	2.7027	2.9321	1.40429	1.56794	1.10723	1.06682	1.14167	1.25611	2.26027	1.07692	0.995575	1.47247	1.47493	1.22601	1.7991	1.29964	3.13676	1.62835	3.17041	2.95671	2.67094	2.13556	4.47059	14.1414	14.1414	20.3704	19.7917	8.65385	10.3774	12.2449	19.2308	17.4312	14.5631	20	11.5789
11.8	1.0214	0.619675	1.05787	0.811993	1.26582	1.26482	1.36561	1.42349	2.29075	1.7134	1.55642	2.3622	2.25564	1.89003	1.8018	2.31481	1.25647	2.52613	0.932401	1.516	1.45304	1.60502	2.94521	1.07692	0.829646	1.21639	2.0649	1.0661	1.7991	1.51625	2.50941	2.01149	1.84941	1.58395	2.24359	2.32126	4	20.202	12.1212	17.5926	11.4583	9.61538	12.2642	10.2041	11.5385	20.1835	17.4757	23	23.1579
11.82	0.924125	0.890782	1.18233	1.37414	1.26582	1.50198	1.11732	1.86833	1.4978	1.09034	2.43191	2.46063	2.00501	2.31959	2.47748	2.9321	1.4782	1.82927	1.1655	1.34756	1.03788	1.39567	2.32877	0.871795	0.940265	1.53649	2.13864	0.692964	1.34933	1.29964	2.38394	2.77778	2.77411	1.37276	2.24359	2.04271	4.94118	14.1414	25.2525	21.2963	16.6667	20.1923	13.2075	13.2653	16.3462	11.9266	17.4757	15	8.42105
11.84	0.924125	0.852053	1.74238	1.1243	1.00211	1.02767	1.73805	2.31317	2.02643	1.24611	2.23735	2.46063	1.4411	2.4055	2.7027	1.85185	1.55211	2.26481	1.34033	0.786075	1.34925	1.18632	2.19178	1.02564	1.27212	1.92061	1.47493	1.27932	1.94903	2.02166	2.88582	1.81992	1.84941	1.58395	1.7094	1.57846	4.47059	15.1515	17.1717	14.8148	14.5833	16.3462	19.8113	15.3061	11.5385	13.7615	15.534	18	21.0526
11.86	1.16732	0.968242	1.36901	1.68645	1.47679	2.68775	1.42768	2.40214	2.46696	1.55763	2.0428	1.5748	1.56642	2.06186	1.91441	2.46914	1.4782	1.91638	1.3986	0.95452	1.29735	2.09351	3.08219	1.28205	0.608407	1.98464	2.43363	1.43923	1.64918	1.37184	2.63488	2.58621	2.11361	1.90074	2.13675	1.76416	5.88235	13.1313	15.1515	11.1111	17.7083	13.4615	16.9811	19.3878	16.3462	11.9266	23.301	13	11.5789
11.88	0.729572	0.735864	0.871189	1.06184	1.26582	2.21344	1.30354	1.86833	3.17181	2.02492	2.52918	2.3622	2.25564	2.66323	2.36486	2.16049	1.4782	2.26481	1.51515	0.786075	1.45304	1.53524	2.73973	0.820513	1.05088	1.28041	1.76991	1.33262	2.09895	1.08303	3.76412	2.87356	2.37781	1.79514	2.24359	2.59981	7.29412	12.1212	17.1717	19.4444	21.875	17.3077	13.2075	7.14286	23.0769	11.9266	16.5049	19	16.8421
11.9	0.875486	0.890782	1.18233	1.93629	1.00211	1.73913	1.30354	2.84698	1.85022	1.94704	2.23735	2.16535	1.56642	3.09278	3.71622	3.54938	1.99557	2.00348	1.28205	1.23526	0.8822	1.32589	2.67123	1.48718	0.663717	1.85659	1.76991	0.799574	1.57421	1.51625	3.26223	2.29885	2.77411	2.53432	2.13675	2.22841	4.47059	15.1515	17.1717	16.6667	17.7083	15.3846	20.7547	21.4286	10.5769	16.5138	18.4466	18	20
11.92	1.60506	0.890782	1.24456	1.93629	1.10759	1.34387	1.67598	1.69039	1.76211	1.63551	2.82101	2.16535	1.94236	2.83505	3.15315	3.39506	1.33038	1.65505	1.68998	0.673779	0.830306	1.60502	1.71233	0.871795	0.884956	1.15237	1.40118	1.22601	2.02399	1.58845	3.3877	1.72414	1.1889	1.68955	2.24359	2.32126	4.23529	14.1414	12.1212	9.25926	16.6667	15.3846	16.9811	20.4082	14.4231	11.9266	19.4175	18	14.7368
11.94	1.55642	0.658404	1.86683	1.06184	1.42405	1.73913	1.42768	2.4911	2.46696	1.94704	2.72374	2.06693	1.69173	1.71821	2.36486	2.9321	1.69993	1.82927	0.932401	0.95452	0.62273	1.60502	2.53425	1.17949	0.940265	1.40845	1.54867	1.0661	1.94903	2.45487	4.01506	1.43678	1.98151	1.79514	2.45726	2.13556	4.70588	22.2222	20.202	17.5926	9.375	12.5	15.0943	19.3878	16.3462	16.5138	15.534	13	15.7895
11.96	1.31323	0.542215	1.24456	1.68645	1.05485	2.45059	1.55183	2.13523	3.52423	1.63551	2.14008	2.16535	2.3183	1.89003	2.36486	3.85802	1.33038	1.91638	1.51515	1.6283	1.29735	1.67481	2.73973	1.02564	1.05088	0.960307	1.69617	1.43923	1.7991	1.44404	2.25847	3.16092	2.11361	2.74551	2.13675	1.29991	6.82353	21.2121	16.1616	22.2222	22.9167	22.1154	16.9811	14.2857	15.3846	17.4312	15.534	19	16.8421
11.98	1.21595	0.774593	1.55569	1.37414	1.05485	1.34387	2.04842	1.51246	2.81938	2.02492	2.33463	2.46063	2.00501	2.23368	3.6036	3.39506	1.62602	1.56794	1.22378	1.12296	1.14167	1.95394	3.08219	1.17949	0.829646	1.40845	1.76991	0.959488	2.92354	1.22744	1.88206	3.06513	2.11361	2.21753	1.81624	2.50696	3.76471	18.1818	16.1616	15.7407	10.4167	14.4231	8.49057	15.3061	12.5	16.5138	18.4466	27	17.8947
12	0.826848	0.968242	0.871189	1.1243	0.949367	1.81818	1.55183	2.40214	2.37885	2.41433	2.72374	2.75591	1.56642	2.4055	2.81532	3.08642	1.40429	2.35192	1.22378	1.34756	1.24546	1.53524	2.39726	1.23077	1.21681	1.85659	2.0649	1.27932	2.62369	2.67148	3.76412	2.20307	3.17041	2.85111	2.13675	1.67131	5.64706	16.1616	14.1414	14.8148	20.8333	15.3846	16.0377	11.2245	11.5385	7.33945	20.3883	18	18.9474
12.02	1.16732	0.890782	0.995644	2.31106	1.10759	2.29249	1.6139	2.04626	2.02643	2.41433	3.40467	2.46063	1.50376	2.66323	2.36486	2.77778	2.21729	1.65505	1.10723	1.40371	1.24546	1.95394	3.08219	1.28205	1.10619	0.960307	1.40118	1.22601	1.7991	1.94946	3.63864	2.77778	2.37781	1.90074	2.45726	2.32126	3.29412	20.202	26.2626	9.25926	14.5833	19.2308	11.3208	12.2449	14.4231	14.6789	10.6796	11	10.5263
12.04	0.875486	0.968242	1.30678	0.874453	1.63502	2.21344	1.55183	2.4911	2.37885	1.7134	1.55642	2.85433	2.25564	2.23368	2.36486	3.54938	2.06948	1.74216	1.04895	1.06682	1.55682	1.32589	2.53425	0.820513	0.940265	1.40845	1.47493	1.38593	1.94903	1.73285	3.13676	2.39464	1.5852	3.0623	2.99145	1.85701	6.58824	18.1818	8.08081	17.5926	20.8333	14.4231	16.9811	22.449	8.65385	12.844	9.70874	13	17.8947
12.06	0.77821	0.929512	1.30678	0.874453	1.26582	2.37154	2.11049	2.4911	1.76211	1.79128	3.6965	2.55906	1.81704	2.49141	2.92793	2.9321	2.21729	2.09059	1.28205	0.842223	1.34925	2.09351	3.08219	1.38462	1.05088	1.40845	2.0649	1.17271	2.17391	2.38267	2.76035	2.87356	3.03831	2.42872	3.20513	1.39276	6.11765	23.2323	20.202	10.1852	17.7083	12.5	16.9811	24.4898	18.2692	12.844	16.5049	14	9.47368
12.08	1.0214	0.929512	0.871189	1.87383	1.58228	2.05534	1.98634	2.2242	1.93833	1.86916	3.30739	2.26378	1.62907	2.23368	2.02703	3.54938	2.14339	2.09059	1.68998	1.23526	1.34925	1.53524	2.26027	1.17949	1.21681	1.98464	1.76991	1.17271	1.94903	2.74368	3.51317	1.72414	2.50991	1.90074	2.45726	1.94986	4.23529	14.1414	14.1414	10.1852	12.5	13.4615	15.0943	14.2857	13.4615	6.42202	15.534	11	12.6316
12.1	1.50778	0.774593	1.61792	1.1243	1.37131	2.13439	1.8622	2.58007	2.46696	2.25857	2.33463	2.26378	1.8797	2.49141	2.59009	3.08642	1.25647	1.82927	1.34033	1.516	1.50493	1.39567	3.0137	1.07692	1.05088	1.72855	1.40118	1.59915	2.32384	1.73285	1.88206	2.20307	1.98151	2.42872	1.7094	2.22841	3.76471	18.1818	24.2424	19.4444	20.8333	10.5769	10.3774	15.3061	11.5385	11.9266	10.6796	9	11.5789
12.12	1.41051	1.00697	1.55569	1.68645	1.52954	2.6087	1.42768	2.58007	2.73128	1.55763	3.01556	2.26378	1.8797	2.31959	2.59009	3.7037	1.84775	2.43902	1.3986	1.516	1.14167	2.16329	1.71233	1.48718	1.38274	1.21639	2.0649	1.38593	2.62369	1.66065	2.88582	2.68199	1.4531	2.21753	2.67094	2.69266	5.17647	25.2525	22.2222	17.5926	11.4583	19.2308	12.2642	13.2653	12.5	11.9266	19.4175	16	10.5263
12.14	0.972763	1.0457	1.61792	1.4366	1.21308	1.50198	1.24146	2.58007	2.99559	1.94704	3.59922	2.46063	1.94236	3.78007	2.47748	3.24074	2.06948	1.91638	1.51515	0.95452	1.24546	1.88416	2.80822	1.89744	1.10619	1.53649	2.21239	1.38593	2.17391	1.15523	4.51694	2.29885	2.50991	3.37909	2.67094	2.50696	4.47059	20.202	14.1414	9.25926	16.6667	17.3077	10.3774	16.3265	10.5769	11.9266	16.5049	6	26.3158
12.16	1.21595	1.20062	1.49347	1.62399	1.37131	1.42292	0.869025	3.02491	2.81938	2.49221	1.94553	2.55906	2.19298	2.83505	1.91441	3.24074	1.55211	2.52613	1.3986	1.01067	1.14167	1.60502	2.87671	1.4359	1.1615	1.60051	2.28614	1.43923	2.24888	2.16606	3.26223	2.01149	1.84941	2.11193	1.81624	2.59981	4.47059	18.1818	9.09091	23.1481	15.625	15.3846	8.49057	15.3061	16.3462	15.5963	10.6796	15	13.6842
12.18	1.26459	1.12316	1.61792	1.74891	1.37131	2.05534	1.11732	3.55872	2.64317	2.9595	2.82101	2.3622	2.19298	2.4055	3.04054	2.46914	1.40429	2.1777	1.34033	1.06682	1.19357	1.53524	3.0137	1.84615	0.774336	1.66453	2.21239	1.59915	1.7991	2.02166	2.25847	2.29885	1.4531	2.42872	2.35043	1.48561	5.64706	15.1515	17.1717	11.1111	9.375	16.3462	19.8113	12.2449	15.3846	17.4312	7.76699	22	12.6316
12.2	1.36187	1.39427	1.1201	2.06121	1.52954	1.81818	1.6139	3.02491	2.20264	2.33645	3.21012	2.75591	2.3183	2.92096	4.39189	3.24074	1.84775	3.04878	1.6317	1.45985	1.34925	2.02373	2.67123	1.4359	1.38274	1.34443	1.9174	0.959488	1.64918	1.80505	3.63864	2.68199	2.24571	2.32313	2.88462	2.32126	8.23529	21.2121	20.202	11.1111	14.5833	19.2308	11.3208	18.3673	17.3077	8.25688	8.73786	14	13.6842
12.22	1.31323	1.08443	1.8046	1.87383	0.791139	2.45059	2.7933	3.73665	3.25991	2.72586	3.30739	2.26378	2.25564	2.74914	4.39189	4.16667	1.40429	3.48432	1.51515	1.85289	1.34925	1.88416	3.35616	1.74359	1.05088	2.04866	2.58112	1.22601	1.72414	2.45487	3.63864	2.10728	2.77411	2.63992	1.92308	2.13556	5.17647	18.1818	18.1818	12.037	22.9167	12.5	11.3208	9.18367	12.5	9.17431	12.6214	22	11.5789
12.24	1.31323	0.968242	1.24456	2.24859	1.37131	2.21344	1.67598	3.02491	3.25991	2.72586	3.30739	3.83858	2.00501	2.31959	2.25225	4.78395	1.84775	2.52613	1.57343	1.34756	1.24546	2.09351	3.83562	1.64103	0.663717	2.1767	2.43363	1.38593	2.02399	2.88809	3.3877	2.29885	2.11361	3.48469	2.13675	3.24977	4.94118	19.1919	15.1515	17.5926	21.875	15.3846	12.2642	28.5714	15.3846	9.17431	13.5922	17	20
12.26	1.36187	1.23935	1.36901	2.24859	0.896624	2.05534	2.35878	3.29181	3.70044	3.03738	3.89105	2.85433	2.44361	2.66323	2.92793	3.08642	2.73466	2.78746	0.990676	1.57215	1.66061	2.37264	2.94521	1.89744	1.60398	2.04866	1.99115	1.49254	2.09895	2.45487	3.76412	2.87356	2.77411	2.85111	2.35043	2.50696	4.47059	15.1515	28.2828	8.33333	15.625	10.5769	19.8113	10.2041	16.3462	13.7615	10.6796	16	11.5789
12.28	1.07004	1.08443	1.55569	1.74891	1.84599	2.29249	1.36561	3.38078	2.81938	2.88162	3.11284	3.34646	2.94486	3.2646	3.71622	2.77778	2.14339	3.223	1.6317	1.17911	1.50493	2.02373	2.87671	1.64103	1.10619	1.72855	2.50737	1.27932	2.3988	2.45487	3.3877	2.20307	2.11361	3.0623	2.5641	2.13556	5.41176	21.2121	14.1414	18.5185	11.4583	16.3462	18.8679	8.16327	16.3462	9.17431	11.6505	18	12.6316
12.3	1.50778	1.47173	1.30678	1.81137	1.68776	2.13439	1.92427	2.04626	3.87665	2.57009	3.01556	2.65748	2.19298	2.74914	3.71622	2.9321	1.69993	2.35192	1.04895	1.29141	1.19357	2.44243	2.73973	1.4359	1.05088	1.72855	2.43363	1.70576	2.69865	2.02166	3.63864	1.81992	1.71731	2.85111	3.20513	3.06407	4.47059	17.1717	24.2424	16.6667	23.9583	17.3077	16.0377	15.3061	13.4615	11.9266	17.4757	12	10.5263
12.32	1.50778	1.23935	1.8046	1.62399	1.26582	2.84585	1.73805	3.11388	2.37885	3.27103	2.91829	2.85433	2.06767	2.14777	3.15315	3.54938	1.92166	3.57143	1.34033	1.68445	1.71251	2.30286	4.10959	1.94872	1.54867	1.92061	2.21239	1.59915	2.09895	2.02166	3.01129	1.341	2.90621	3.1679	2.67094	2.41411	3.76471	14.1414	16.1616	20.3704	16.6667	7.69231	16.0377	20.4082	10.5769	13.7615	20.3883	21	16.8421
12.34	1.55642	1.16189	2.11574	1.68645	1.74051	2.05534	2.60708	3.11388	3.17181	2.25857	4.0856	3.14961	2.25564	2.4055	2.7027	2.62346	1.77384	2.61324	1.92308	1.68445	1.29735	1.88416	2.94521	1.79487	0.774336	1.72855	2.0649	1.86567	1.72414	2.59928	2.88582	2.29885	4.49141	4.54065	2.02991	1.76416	6.58824	24.2424	16.1616	7.40741	11.4583	15.3846	19.8113	21.4286	22.1154	14.6789	13.5922	14	11.5789
12.36	1.75097	1.0457	1.74238	1.1243	1.31857	2.37154	1.8622	3.11388	2.64317	3.42679	2.82101	3.05118	1.8797	2.57732	3.49099	2.46914	2.21729	2.78746	1.3986	1.90904	0.985989	1.88416	2.39726	1.84615	1.65929	2.04866	1.99115	1.59915	3.07346	1.58845	3.76412	2.77778	3.96301	1.79514	3.09829	2.69266	5.41176	14.1414	15.1515	18.5185	14.5833	15.3846	7.54717	19.3878	14.4231	20.1835	14.5631	15	15.7895
12.38	1.16732	1.23935	0.995644	1.62399	1.05485	2.7668	1.8622	3.29181	3.61233	2.88162	3.50195	3.54331	2.3183	3.00687	2.47748	3.54938	2.2912	2.52613	2.0979	1.7406	1.19357	1.95394	3.49315	1.12821	1.32743	1.92061	2.21239	1.86567	2.69865	2.23827	3.13676	2.20307	4.49141	3.69588	2.35043	2.22841	2.82353	10.101	19.1919	16.6667	16.6667	16.3462	13.2075	15.3061	17.3077	11.9266	14.5631	17	16.8421
12.4	1.41051	0.968242	1.24456	1.68645	1.37131	1.26482	1.67598	3.20285	2.46696	1.86916	2.82101	2.65748	2.3183	2.92096	2.02703	3.39506	2.14339	2.52613	0.874126	1.23526	1.14167	2.51221	3.28767	1.58974	1.10619	1.28041	2.13864	1.59915	1.72414	2.45487	3.76412	1.341	3.03831	3.48469	2.13675	1.57846	4.70588	19.1919	17.1717	22.2222	13.5417	10.5769	12.2642	11.2245	4.80769	11.9266	13.5922	16	8.42105
12.42	1.50778	1.08443	1.1201	1.81137	1.47679	3.16206	2.42086	3.46975	1.85022	3.03738	2.33463	3.24803	2.25564	2.4055	2.25225	2.16049	1.84775	1.91638	0.932401	1.40371	1.29735	2.02373	3.28767	1.53846	1.43805	1.28041	1.62242	1.49254	1.72414	1.58845	3.26223	1.91571	3.03831	2.42872	1.92308	2.04271	4	15.1515	15.1515	11.1111	15.625	18.2692	13.2075	16.3265	17.3077	11.0092	18.4466	18	20
12.44	1.31323	0.619675	1.43124	1.49906	0.738397	2.21344	1.6139	2.13523	1.40969	3.42679	2.91829	2.85433	2.06767	2.74914	2.36486	2.46914	1.84775	2.61324	0.990676	1.45985	1.45304	2.23308	1.64384	1.48718	1.1615	1.72855	2.28614	1.27932	1.87406	1.58845	2.25847	1.53257	4.22721	2.53432	2.35043	1.67131	3.76471	16.1616	19.1919	17.5926	23.9583	17.3077	11.3208	15.3061	14.4231	11.9266	9.70874	15	20
12.46	1.60506	0.697134	1.68015	1.24922	1.10759	2.05534	1.42768	2.13523	2.55507	2.1028	2.62646	2.75591	3.07018	2.4055	2.92793	4.01235	1.55211	2.09059	1.45688	1.12296	1.50493	1.67481	3.63014	1.74359	1.38274	1.98464	2.50737	1.27932	1.1994	2.02166	3.13676	2.77778	3.17041	3.0623	2.5641	2.22841	4	24.2424	11.1111	15.7407	11.4583	16.3462	10.3774	12.2449	13.4615	18.3486	8.73786	7	11.5789
12.48	0.77821	0.890782	1.36901	2.24859	0.843882	2.7668	1.55183	1.86833	2.37885	2.02492	2.14008	2.65748	1.81704	1.28866	1.8018	2.77778	1.84775	2.35192	1.74825	1.45985	1.24546	0.837404	2.26027	1.12821	1.27212	1.98464	1.47493	1.27932	2.02399	1.22744	2.50941	2.29885	4.62351	2.42872	2.88462	2.13556	5.88235	10.101	18.1818	14.8148	17.7083	15.3846	13.2075	22.449	14.4231	14.6789	13.5922	12	14.7368
12.5	1.60506	1.12316	1.18233	1.18676	1.16034	1.97628	2.48293	2.84698	2.73128	2.25857	2.14008	3.14961	1.8797	1.97595	2.59009	2.31481	1.33038	2.52613	0.815851	0.95452	1.34925	1.53524	2.60274	1.17949	1.05088	1.34443	1.54867	1.33262	1.94903	1.15523	2.76035	1.341	2.64201	2.42872	2.67094	2.59981	4.94118	22.2222	15.1515	16.6667	21.875	13.4615	27.3585	16.3265	16.3462	11.0092	22.3301	13	11.5789
12.52	1.0214	1.16189	1.55569	1.37414	1.10759	2.05534	1.36561	1.9573	2.11454	2.02492	3.01556	2.55906	1.62907	1.37457	1.8018	3.24074	1.4782	2.09059	1.22378	1.06682	1.24546	0.907188	3.08219	1.23077	1.54867	1.21639	1.25369	1.54584	1.72414	1.44404	2.38394	1.53257	3.17041	2.53432	2.35043	2.13556	4.70588	20.202	14.1414	10.1852	20.8333	17.3077	18.8679	13.2653	19.2308	9.17431	9.70874	16	14.7368
12.54	1.21595	0.542215	1.36901	0.811993	1.42405	2.13439	1.36561	2.40214	2.37885	2.49221	2.33463	2.75591	1.37845	2.23368	2.92793	3.24074	1.40429	1.82927	1.22378	1.34756	1.55682	1.25611	2.94521	1.28205	0.940265	1.60051	1.25369	1.17271	1.7991	1.87726	3.26223	2.01149	2.77411	1.79514	1.92308	1.67131	3.29412	13.1313	17.1717	11.1111	21.875	18.2692	14.1509	16.3265	11.5385	10.0917	16.5049	11	16.8421
12.56	0.680934	0.503486	1.05787	1.4366	1.31857	1.50198	1.24146	1.86833	2.37885	2.25857	2.0428	2.55906	1.25313	2.57732	2.81532	2.16049	1.33038	2.26481	1.34033	0.898372	1.40114	1.04676	2.53425	1.12821	0.884956	1.85659	1.99115	1.22601	1.72414	1.58845	1.88206	1.53257	1.5852	2.95671	2.24359	1.67131	4.23529	21.2121	12.1212	22.2222	21.875	23.0769	10.3774	11.2245	14.4231	16.5138	13.5922	12	13.6842
12.58	1.11868	1.00697	1.36901	1.24922	0.843882	1.10672	1.67598	3.02491	2.29075	2.64798	2.62646	2.65748	2.25564	1.89003	2.81532	1.54321	1.69993	1.48084	1.1655	1.23526	0.8822	2.09351	2.53425	1.12821	0.995575	1.98464	2.28614	1.27932	2.09895	2.23827	2.133	2.68199	2.50991	2.21753	2.77778	2.69266	3.52941	15.1515	16.1616	13.8889	19.7917	16.3462	10.3774	21.4286	9.61538	14.6789	8.73786	19	11.5789
12.6	0.77821	0.929512	1.24456	1.49906	0.896624	1.34387	1.67598	1.60142	2.46696	2.02492	2.72374	2.65748	1.75439	2.74914	2.02703	2.00617	1.69993	0.958188	0.699301	1.40371	0.674624	1.46546	2.46575	1.07692	0.829646	0.576184	1.54867	1.01279	2.09895	1.08303	1.88206	2.01149	1.84941	2.42872	2.13675	1.76416	4.47059	20.202	15.1515	13.8889	16.6667	12.5	14.1509	19.3878	17.3077	13.7615	21.3592	21	9.47368
12.62	0.924125	0.542215	1.30678	1.37414	1.10759	1.73913	1.17939	2.04626	1.85022	2.49221	1.94553	1.27953	1.31579	2.14777	1.68919	2.62346	1.92166	2.61324	1.1655	1.12296	1.19357	1.32589	2.73973	1.33333	1.43805	0.704225	1.47493	1.75906	1.87406	1.94946	3.01129	2.20307	1.84941	2.42872	1.81624	1.67131	5.64706	21.2121	24.2424	14.8148	14.5833	10.5769	16.0377	20.4082	10.5769	21.1009	10.6796	14	9.47368
12.64	0.875486	0.697134	1.43124	1.31168	1.42405	1.73913	1.48976	2.13523	2.37885	2.18069	2.23735	2.26378	1.37845	2.57732	2.81532	2.31481	1.40429	1.65505	1.51515	1.23526	0.830306	1.18632	2.19178	1.53846	1.10619	1.60051	1.25369	1.22601	2.54873	1.80505	3.51317	2.01149	1.71731	1.79514	1.7094	2.04271	3.05882	19.1919	19.1919	18.5185	20.8333	11.5385	13.2075	19.3878	10.5769	19.2661	12.6214	13	9.47368
12.66	1.16732	0.542215	1.24456	1.18676	1.21308	1.58103	1.48976	1.9573	2.37885	2.18069	3.30739	2.16535	1.4411	1.37457	2.7027	2.9321	1.69993	2.09059	1.45688	1.17911	1.29735	2.51221	2.12329	0.717949	1.38274	1.28041	1.25369	1.33262	1.72414	1.15523	3.26223	1.81992	3.56671	2.00634	3.4188	1.76416	4.94118	14.1414	12.1212	15.7407	21.875	14.4231	13.2075	10.2041	15.3846	16.5138	12.6214	18	18.9474
12.68	1.16732	1.12316	0.995644	1.24922	1.05485	1.02767	1.30354	1.60142	2.02643	1.55763	1.75097	1.87008	1.69173	1.89003	2.59009	2.62346	0.960828	2.1777	1.22378	1.12296	0.830306	1.74459	1.84932	1.12821	0.940265	1.15237	1.69617	1.17271	2.09895	1.44404	2.76035	1.14943	2.64201	2.32313	1.92308	1.67131	6.11765	16.1616	22.2222	13.8889	11.4583	14.4231	7.54717	24.4898	15.3846	11.9266	6.79612	18	18.9474
12.7	1.0214	0.503486	0.684505	1.31168	0.896624	1.58103	1.80012	2.40214	2.20264	1.7134	2.52918	2.06693	1.12782	2.57732	2.13964	3.24074	1.33038	2.35192	1.22378	1.01067	1.24546	1.74459	1.91781	1.12821	0.995575	1.34443	1.10619	1.43923	1.72414	1.29964	1.75659	0.862069	1.84941	1.68955	1.38889	2.22841	3.76471	15.1515	12.1212	9.25926	15.625	13.4615	16.0377	10.2041	10.5769	9.17431	19.4175	15	22.1053
12.72	0.875486	0.580945	1.05787	0.687071	1.00211	1.18577	1.17939	1.86833	2.55507	1.79128	1.75097	2.26378	1.75439	1.46048	2.25225	3.54938	1.33038	2.26481	1.04895	1.17911	0.985989	1.18632	2.26027	1.33333	1.10619	1.53649	1.32743	1.17271	1.49925	1.80505	2.38394	1.91571	2.64201	2.32313	1.49573	1.29991	2.58824	10.101	15.1515	12.037	19.7917	17.3077	14.1509	19.3878	7.69231	15.5963	11.6505	13	13.6842
12.74	1.11868	0.735864	1.1201	1.37414	1.16034	1.18577	1.55183	2.13523	2.11454	2.18069	1.75097	2.06693	2.00501	2.31959	2.36486	1.23457	1.25647	1.48084	1.3986	1.34756	1.14167	0.976971	2.32877	1.28205	0.829646	1.02433	1.76991	1.65245	0.974513	1.73285	3.13676	1.53257	1.4531	2.85111	2.5641	1.11421	2.58824	10.101	16.1616	10.1852	23.9583	11.5385	11.3208	14.2857	9.61538	9.17431	6.79612	13	22.1053
12.76	0.972763	1.16189	1.05787	1.06184	1.16034	1.34387	1.8622	2.31317	2.64317	2.18069	1.6537	1.67323	1.37845	1.89003	1.8018	2.9321	1.99557	2.00348	1.04895	0.673779	1.19357	1.39567	1.84932	1.23077	0.995575	1.08835	1.9174	0.959488	1.7991	1.58845	2.76035	1.91571	1.321	1.05597	2.24359	1.29991	4.94118	10.101	20.202	8.33333	16.6667	17.3077	14.1509	14.2857	13.4615	17.4312	16.5049	20	14.7368
12.78	1.07004	0.774593	1.36901	0.999375	0.949367	1.50198	1.11732	2.58007	2.20264	3.03738	2.72374	2.06693	1.81704	2.31959	2.59009	1.69753	1.33038	2.1777	1.22378	1.12296	0.778412	1.67481	2.26027	0.871795	1.49336	0.960307	2.0649	1.1194	1.94903	1.44404	3.13676	2.10728	2.90621	1.90074	1.92308	2.22841	4.23529	16.1616	17.1717	13.8889	16.6667	17.3077	21.6981	12.2449	7.69231	13.7615	7.76699	15	12.6316
12.8	1.16732	0.580945	0.995644	1.4366	1.16034	1.81818	1.6139	2.75801	2.11454	1.7134	1.84825	1.67323	1.94236	1.54639	1.91441	2.9321	1.4782	1.74216	1.1655	0.673779	0.726518	2.02373	2.67123	1.02564	1.21681	0.960307	1.03245	1.38593	1.7991	1.80505	2.50941	1.72414	2.77411	2.00634	2.88462	1.76416	4.47059	13.1313	17.1717	15.7407	16.6667	13.4615	16.0377	10.2041	18.2692	13.7615	22.3301	12	9.47368
12.82	0.924125	0.968242	1.55569	1.31168	0.896624	2.45059	1.24146	1.69039	1.93833	1.7134	1.94553	1.5748	1.4411	2.23368	3.04054	2.9321	1.18256	1.82927	1.51515	0.617631	1.19357	2.02373	1.91781	0.923077	1.10619	0.896287	0.958702	0.959488	2.02399	1.66065	1.75659	1.53257	1.5852	1.47835	1.28205	1.85701	4.23529	14.1414	15.1515	10.1852	17.7083	13.4615	16.0377	19.3878	8.65385	15.5963	16.5049	11	11.5789
12.84	0.875486	1.00697	0.871189	1.56152	0.896624	0.869565	1.36561	2.04626	2.55507	2.02492	2.33463	1.9685	1.56642	1.97595	2.59009	1.85185	1.40429	2.1777	1.45688	1.23526	0.8822	1.95394	2.39726	1.02564	1.10619	1.15237	1.99115	1.54584	2.09895	1.51625	3.01129	2.49042	1.321	1.68955	2.99145	1.85701	3.05882	15.1515	15.1515	13.8889	14.5833	11.5385	13.2075	12.2449	14.4231	11.9266	11.6505	10	5.26316
12.86	0.972763	0.658404	1.18233	1.1243	1.00211	1.73913	1.6139	2.2242	1.5859	1.7134	2.14008	2.26378	1.81704	1.80412	2.36486	3.7037	1.40429	2.00348	1.6317	0.95452	1.03788	1.81438	2.19178	1.02564	0.995575	1.47247	1.84366	1.38593	1.34933	1.66065	1.38018	1.14943	2.24571	1.37276	1.38889	2.32126	3.52941	17.1717	19.1919	18.5185	20.8333	13.4615	14.1509	14.2857	13.4615	7.33945	23.301	15	11.5789
12.88	1.36187	0.852053	1.05787	1.49906	0.949367	2.7668	1.6139	2.13523	2.46696	1.86916	1.6537	1.67323	1.37845	1.97595	2.59009	2.9321	2.14339	1.82927	1.1655	0.898372	0.726518	1.46546	2.12329	1.79487	1.38274	1.72855	1.76991	1.17271	1.57421	1.73285	3.13676	1.72414	2.50991	2.53432	2.45726	1.57846	4	21.2121	19.1919	12.037	16.6667	11.5385	16.0377	13.2653	6.73077	11.9266	8.73786	16	12.6316
12.9	1.07004	0.697134	1.1201	1.37414	1.21308	2.05534	1.92427	1.77936	0.969163	1.94704	2.14008	1.87008	1.69173	2.31959	1.8018	4.01235	1.62602	2.00348	1.04895	1.45985	1.34925	1.60502	2.39726	0.974359	0.553097	1.47247	2.0649	1.33262	1.64918	1.58845	2.25847	1.14943	1.321	2.63992	2.13675	1.94986	4.23529	16.1616	11.1111	14.8148	15.625	13.4615	13.2075	14.2857	10.5769	10.0917	7.76699	14	14.7368
12.92	0.972763	0.735864	0.808961	1.74891	1.16034	2.05534	1.55183	1.33452	2.90749	1.7134	2.0428	2.75591	1.8797	2.66323	2.47748	3.08642	1.4782	2.26481	1.28205	1.516	1.08978	1.67481	2.46575	1.33333	0.995575	1.40845	1.17994	1.33262	2.17391	1.44404	2.50941	2.29885	1.98151	2.74551	2.13675	1.67131	4.94118	17.1717	15.1515	12.037	15.625	11.5385	13.2075	14.2857	13.4615	6.42202	15.534	16	18.9474
12.94	1.11868	1.0457	1.49347	0.874453	1.52954	1.50198	1.48976	2.31317	1.76211	1.55763	1.6537	2.46063	1.81704	2.74914	2.92793	2.31481	1.99557	1.21951	1.1655	1.01067	1.29735	1.32589	2.73973	1.4359	1.05088	1.08835	1.32743	1.27932	1.87406	1.29964	2.38394	2.01149	1.5852	1.79514	2.99145	2.13556	4	14.1414	13.1313	16.6667	14.5833	15.3846	9.43396	9.18367	15.3846	17.4312	11.6505	16	17.8947
12.96	1.07004	0.968242	0.995644	1.37414	0.791139	1.89723	1.05525	2.04626	2.73128	1.63551	2.52918	2.3622	1.94236	1.28866	2.81532	3.24074	1.4782	2.00348	0.757576	1.516	1.03788	0.907188	1.84932	1.33333	0.829646	1.72855	1.84366	1.1194	2.17391	2.16606	3.13676	3.06513	3.83091	2.00634	2.77778	2.32126	4.94118	12.1212	10.101	12.037	13.5417	9.61538	10.3774	8.16327	12.5	13.7615	14.5631	21	9.47368
12.98	0.729572	0.852053	1.30678	0.999375	1.10759	0.869565	1.17939	2.13523	2.37885	2.49221	1.94553	1.87008	1.62907	2.06186	2.25225	2.46914	1.99557	2.35192	1.34033	1.85289	1.08978	1.60502	3.15068	1.48718	1.05088	1.40845	1.62242	1.43923	2.17391	1.80505	2.25847	1.81992	3.03831	3.1679	1.81624	2.41411	4.47059	14.1414	23.2323	14.8148	23.9583	13.4615	12.2642	12.2449	22.1154	10.0917	12.6214	12	21.0526
13	1.21595	0.929512	1.55569	0.999375	1.26582	2.21344	1.6139	2.13523	1.67401	1.94704	2.62646	1.77165	2.13033	1.80412	2.36486	2.31481	1.69993	2.61324	1.22378	1.45985	1.03788	1.60502	2.87671	1.23077	1.27212	1.47247	1.84366	1.0661	1.27436	1.29964	2.88582	1.81992	2.11361	2.63992	1.38889	1.48561	3.76471	15.1515	12.1212	12.963	10.4167	14.4231	10.3774	13.2653	14.4231	11.9266	11.6505	13	9.47368
13.02	1.11868	0.890782	1.36901	1.24922	1.21308	1.34387	1.48976	2.2242	2.55507	1.16822	2.72374	1.08268	1.69173	1.6323	1.68919	2.62346	1.25647	2.09059	1.10723	1.12296	1.03788	1.25611	2.53425	1.48718	1.21681	2.04866	1.76991	1.27932	1.7991	2.09386	2.133	1.81992	2.64201	2.11193	2.35043	1.76416	3.05882	19.1919	16.1616	12.037	11.4583	15.3846	16.9811	13.2653	8.65385	14.6789	8.73786	8	20
13.04	1.31323	0.852053	1.24456	1.87383	0.685654	1.58103	1.48976	1.77936	2.11454	2.49221	1.84825	1.9685	1.37845	2.31959	2.13964	3.08642	1.4782	2.00348	0.990676	1.29141	1.45304	1.39567	2.19178	1.84615	1.49336	1.08835	1.76991	1.38593	1.64918	1.80505	2.88582	2.20307	1.98151	2.42872	2.24359	2.04271	3.52941	4.0404	18.1818	11.1111	13.5417	9.61538	21.6981	17.3469	14.4231	18.3486	11.6505	23	17.8947
13.06	1.55642	0.426026	0.746733	1.06184	1.10759	1.58103	1.6139	2.4911	2.20264	2.64798	2.33463	1.08268	1.50376	2.57732	2.13964	2.31481	1.55211	1.82927	1.28205	1.01067	1.50493	1.60502	2.39726	1.28205	1.1615	1.40845	1.40118	0.959488	2.02399	1.58845	2.50941	1.72414	1.321	2.21753	1.7094	2.59981	3.52941	14.1414	20.202	12.037	14.5833	7.69231	15.0943	19.3878	9.61538	12.844	14.5631	14	13.6842
13.08	1.0214	0.929512	1.18233	1.56152	1.47679	1.66008	1.8622	1.69039	2.29075	2.02492	2.33463	2.65748	2.38095	2.14777	2.7027	2.62346	1.92166	2.35192	1.51515	1.40371	1.34925	1.46546	2.80822	1.79487	0.663717	1.79257	1.40118	1.22601	2.32384	1.94946	2.25847	1.81992	1.71731	1.16156	2.45726	1.76416	4.23529	9.09091	14.1414	12.963	12.5	15.3846	5.66038	14.2857	13.4615	13.7615	12.6214	13	16.8421
13.1	1.07004	0.580945	1.36901	1.56152	1.63502	1.18577	1.73805	1.77936	2.46696	1.63551	2.72374	2.3622	1.62907	2.83505	1.57658	3.7037	1.25647	2.52613	1.45688	0.898372	1.45304	1.60502	3.83562	1.4359	1.32743	1.53649	0.958702	1.22601	1.1994	1.58845	1.88206	1.05364	2.11361	1.90074	2.35043	2.04271	4.47059	12.1212	17.1717	14.8148	11.4583	10.5769	15.0943	14.2857	12.5	16.5138	15.534	6	21.0526
13.12	1.36187	0.890782	0.871189	1.1243	1.42405	1.66008	1.6139	2.13523	2.73128	1.79128	2.23735	2.3622	1.19048	2.14777	2.7027	2.9321	1.25647	2.26481	1.3986	1.29141	1.29735	1.74459	2.05479	1.69231	0.884956	1.85659	1.99115	0.852878	2.24888	1.87726	2.88582	1.72414	2.24571	1.68955	2.67094	2.22841	3.29412	11.1111	10.101	14.8148	19.7917	18.2692	14.1509	12.2449	19.2308	19.2661	14.5631	12	16.8421
13.14	1.36187	0.852053	1.74238	1.1243	1.42405	2.84585	1.11732	1.9573	3.17181	1.24611	1.75097	2.46063	1.37845	1.97595	2.36486	3.39506	1.25647	2.00348	1.22378	0.898372	1.86819	1.81438	2.32877	1.12821	0.995575	1.34443	1.40118	1.33262	1.94903	1.51625	2.25847	2.58621	1.98151	1.68955	2.13675	1.94986	3.29412	10.101	14.1414	9.25926	20.8333	17.3077	14.1509	15.3061	17.3077	17.4312	16.5049	18	10.5263
13.16	1.41051	0.774593	0.746733	1.1243	1.42405	1.50198	1.17939	2.13523	2.02643	2.1028	2.82101	1.5748	1.69173	1.80412	2.36486	2.00617	1.62602	1.74216	1.51515	1.29141	1.03788	1.53524	1.9863	1.53846	1.27212	1.98464	1.40118	1.1194	1.94903	2.16606	2.76035	3.54406	1.5852	1.79514	1.60256	2.41411	5.64706	11.1111	20.202	13.8889	19.7917	17.3077	10.3774	11.2245	16.3462	10.0917	12.6214	10	15.7895
13.18	1.0214	0.774593	1.05787	1.49906	0.843882	1.50198	1.8622	2.13523	1.85022	1.63551	1.55642	2.75591	1.50376	3.17869	3.26577	3.54938	2.2912	2.52613	1.22378	0.898372	1.34925	1.88416	1.84932	1.12821	1.05088	1.34443	1.84366	1.59915	1.7991	1.87726	3.63864	2.49042	1.321	2.32313	2.13675	1.48561	3.76471	8.08081	13.1313	20.3704	17.7083	13.4615	13.2075	11.2245	16.3462	16.5138	9.70874	15	14.7368
13.2	1.0214	1.0457	1.61792	1.37414	1.47679	1.58103	0.993172	2.58007	2.73128	2.02492	2.43191	2.16535	1.75439	2.31959	3.04054	2.16049	1.40429	2.09059	1.68998	1.516	0.8822	1.18632	2.26027	1.12821	1.38274	1.92061	2.43363	1.38593	1.42429	1.58845	1.75659	1.81992	3.96301	2.42872	2.02991	1.11421	4.94118	20.202	15.1515	12.963	13.5417	14.4231	10.3774	14.2857	13.4615	19.2661	13.5922	16	13.6842
13.22	1.21595	0.735864	1.74238	1.1243	1.16034	1.89723	1.73805	2.04626	1.93833	1.24611	1.6537	2.75591	1.69173	2.57732	3.15315	2.46914	1.40429	1.65505	1.22378	1.34756	0.8822	2.09351	2.46575	1.23077	0.940265	1.66453	1.47493	1.59915	2.32384	1.66065	2.50941	2.10728	2.50991	2.32313	1.81624	1.94986	4.94118	13.1313	15.1515	12.963	8.33333	9.61538	14.1509	15.3061	23.0769	11.9266	9.70874	11	10.5263
13.24	1.11868	0.890782	0.933416	1.37414	0.896624	1.81818	2.04842	1.86833	2.55507	2.49221	1.6537	2.55906	0.814536	1.6323	2.36486	1.69753	1.4782	2.35192	1.51515	0.898372	1.34925	1.32589	2.67123	1.17949	1.21681	1.40845	2.13864	1.01279	2.02399	1.01083	2.38394	2.10728	2.37781	2.42872	2.13675	1.85701	4.23529	16.1616	21.2121	13.8889	13.5417	10.5769	15.0943	18.3673	9.61538	8.25688	13.5922	15	13.6842
13.26	1.07004	0.813323	0.995644	1.24922	1.10759	1.66008	1.05525	1.51246	2.55507	1.94704	2.23735	1.5748	1.19048	2.74914	2.36486	2.16049	1.18256	1.91638	1.22378	1.01067	1.55682	1.74459	2.26027	1.07692	1.49336	1.92061	1.76991	0.959488	1.49925	1.66065	2.63488	1.43678	3.03831	2.32313	1.92308	2.41411	2.82353	15.1515	20.202	13.8889	26.0417	15.3846	16.9811	16.3265	17.3077	14.6789	9.70874	10	12.6316
13.28	0.972763	0.774593	1.18233	1.24922	1.10759	1.73913	0.806952	2.66904	2.73128	1.7134	2.33463	2.16535	1.31579	1.97595	2.25225	2.62346	1.25647	1.91638	0.757576	1.34756	1.71251	1.25611	2.94521	1.38462	1.32743	0.768246	1.76991	0.852878	1.57421	2.16606	2.25847	1.62835	1.98151	1.47835	2.45726	1.94986	3.76471	9.09091	16.1616	12.963	15.625	7.69231	14.1509	12.2449	8.65385	11.9266	16.5049	12	18.9474
13.3	1.21595	1.00697	0.933416	1.4366	0.843882	1.66008	1.42768	1.86833	2.11454	2.25857	1.75097	1.77165	1.75439	3.35052	2.02703	2.46914	0.960828	1.39373	1.6317	0.729927	0.985989	1.39567	2.26027	1.23077	1.38274	1.79257	1.47493	1.65245	1.49925	1.15523	2.133	2.49042	1.5852	2.00634	1.92308	2.22841	4	17.1717	21.2121	13.8889	10.4167	14.4231	9.43396	13.2653	15.3846	14.6789	10.6796	14	20
13.32	1.16732	0.774593	1.24456	1.37414	1.26582	2.37154	1.6139	2.04626	3.25991	2.18069	2.72374	1.87008	1.25313	2.49141	2.25225	2.31481	1.99557	1.65505	1.04895	1.6283	1.03788	1.53524	3.08219	1.02564	1.1615	1.34443	1.84366	1.38593	1.72414	1.80505	2.76035	1.81992	2.50991	2.11193	2.35043	1.39276	5.64706	7.07071	16.1616	8.33333	10.4167	14.4231	10.3774	15.3061	13.4615	13.7615	6.79612	8	8.42105
13.34	1.50778	0.890782	1.92906	1.56152	0.949367	1.66008	1.80012	2.84698	2.11454	1.86916	2.14008	1.27953	2.3183	2.4055	2.02703	3.24074	2.43902	2.26481	1.22378	1.12296	0.726518	1.60502	2.19178	1.02564	1.49336	1.66453	1.62242	1.22601	1.94903	1.73285	1.75659	1.72414	2.37781	2.00634	2.13675	1.57846	3.52941	11.1111	8.08081	17.5926	12.5	9.61538	9.43396	11.2245	3.84615	9.17431	10.6796	10	10.5263
13.36	1.0214	0.658404	1.1201	1.49906	1.05485	1.97628	1.11732	1.9573	1.76211	1.79128	2.62646	0.984252	1.75439	2.14777	2.25225	2.31481	1.92166	2.09059	0.815851	1.29141	1.08978	1.46546	2.53425	1.69231	1.43805	2.04866	2.43363	1.33262	2.02399	1.37184	3.26223	1.341	2.24571	1.58395	2.45726	1.48561	5.17647	11.1111	22.2222	13.8889	13.5417	14.4231	16.9811	12.2449	20.1923	16.5138	13.5922	12	13.6842
13.38	0.680934	1.00697	1.36901	1.06184	1.26582	1.66008	1.6139	1.86833	1.85022	1.79128	1.36187	2.26378	1.75439	2.14777	1.8018	3.08642	0.886918	2.09059	1.28205	1.12296	1.7644	0.907188	1.91781	1.74359	1.54867	1.85659	1.40118	1.01279	1.1994	1.58845	2.00753	1.62835	2.90621	1.68955	2.13675	2.41411	3.05882	9.09091	15.1515	9.25926	12.5	15.3846	9.43396	21.4286	14.4231	7.33945	15.534	20	8.42105
13.4	0.826848	0.619675	1.36901	1.31168	1.10759	1.73913	1.36561	2.13523	1.85022	2.02492	2.23735	2.3622	1.50376	2.14777	2.92793	2.46914	1.92166	1.74216	1.28205	1.06682	1.55682	2.51221	2.94521	1.02564	1.32743	1.34443	1.76991	1.59915	2.3988	1.58845	3.3877	1.341	1.5852	2.63992	1.7094	1.29991	3.29412	12.1212	15.1515	10.1852	18.75	8.65385	13.2075	15.3061	21.1538	11.9266	14.5631	12	17.8947
13.42	1.07004	0.658404	1.1201	1.31168	0.949367	1.26482	1.48976	2.58007	2.11454	2.25857	2.52918	1.87008	1.12782	1.97595	2.7027	2.00617	1.69993	2.35192	1.04895	1.45985	1.14167	1.81438	2.05479	1.12821	1.10619	1.34443	2.21239	0.799574	1.34933	1.51625	2.38394	2.20307	2.37781	2.11193	1.17521	1.67131	4.47059	14.1414	19.1919	12.037	19.7917	15.3846	16.0377	15.3061	14.4231	12.844	13.5922	7	12.6316
13.44	0.875486	0.968242	1.36901	1.37414	1.47679	1.34387	1.30354	2.40214	2.02643	2.25857	1.75097	2.46063	1.37845	2.31959	2.59009	3.7037	1.77384	2.52613	0.815851	1.17911	0.934094	1.18632	1.9863	1.53846	0.940265	1.79257	1.9174	0.799574	1.64918	1.22744	1.88206	2.20307	2.37781	1.90074	1.92308	2.13556	5.17647	10.101	15.1515	9.25926	18.75	10.5769	14.1509	18.3673	12.5	15.5963	9.70874	18	8.42105
13.46	1.11868	0.658404	1.1201	1.06184	1.31857	2.05534	1.80012	2.04626	2.64317	1.7134	1.75097	1.37795	1.56642	2.57732	2.92793	2.31481	0.960828	1.91638	1.28205	1.06682	1.34925	1.95394	1.9863	1.69231	1.38274	1.02433	1.9174	1.65245	2.69865	1.73285	2.25847	0.862069	2.37781	2.21753	1.92308	1.94986	4.47059	8.08081	13.1313	12.037	19.7917	10.5769	20.7547	16.3265	15.3846	12.844	7.76699	16	9.47368
13.48	1.07004	0.697134	1.18233	1.81137	1.10759	1.66008	1.05525	2.13523	2.20264	2.33645	2.14008	1.87008	1.94236	1.46048	1.91441	2.77778	1.77384	2.87456	1.04895	1.17911	1.19357	1.25611	2.87671	1.79487	0.940265	1.28041	2.21239	0.746269	2.54873	1.66065	2.38394	1.53257	2.64201	2.74551	1.7094	1.76416	4.70588	18.1818	19.1919	21.2963	20.8333	8.65385	7.54717	10.2041	15.3846	12.844	17.4757	11	13.6842
13.5	1.45914	0.929512	1.49347	1.49906	1.00211	1.66008	1.42768	2.04626	2.46696	2.02492	2.91829	1.77165	1.75439	2.66323	2.36486	2.9321	1.62602	2.26481	1.1655	1.45985	1.14167	1.60502	2.87671	1.58974	0.884956	1.79257	2.0649	1.22601	2.3988	2.02166	2.63488	2.49042	1.71731	2.32313	2.67094	2.13556	5.64706	18.1818	10.101	12.037	18.75	12.5	12.2642	14.2857	16.3462	11.9266	10.6796	16	9.47368
13.52	1.11868	0.580945	1.55569	1.49906	1.21308	2.45059	1.24146	2.2242	2.11454	1.94704	2.14008	1.77165	1.4411	2.66323	2.47748	2.62346	1.4782	1.74216	0.932401	1.12296	1.29735	1.46546	2.26027	1.12821	0.884956	1.15237	1.84366	1.33262	2.02399	1.73285	2.63488	1.91571	2.11361	1.90074	1.49573	1.67131	5.41176	15.1515	20.202	13.8889	19.7917	8.65385	12.2642	24.4898	9.61538	13.7615	9.70874	9	11.5789
13.54	1.0214	0.968242	1.43124	1.37414	0.896624	2.05534	1.30354	2.13523	2.11454	2.57009	2.33463	1.37795	1.94236	1.6323	1.8018	2.77778	1.03474	2.00348	1.3986	0.842223	1.45304	1.81438	2.53425	1.58974	1.1615	1.47247	1.9174	1.27932	1.64918	1.73285	2.25847	1.43678	1.71731	1.79514	2.24359	1.76416	4.23529	11.1111	16.1616	16.6667	12.5	11.5385	14.1509	9.18367	16.3462	11.0092	11.6505	26	8.42105
13.56	0.826848	0.658404	0.684505	1.24922	1.42405	2.13439	1.11732	2.40214	2.29075	2.57009	3.11284	2.06693	1.19048	2.14777	3.04054	2.16049	1.10865	2.35192	1.92308	1.06682	1.29735	1.39567	1.9863	1.58974	1.32743	1.66453	1.84366	1.49254	1.72414	1.58845	1.88206	1.05364	1.4531	2.85111	2.35043	2.41411	5.64706	9.09091	13.1313	10.1852	10.4167	9.61538	10.3774	21.4286	13.4615	9.17431	18.4466	8	8.42105
13.58	0.77821	0.852053	1.55569	1.49906	0.843882	1.97628	1.11732	2.13523	2.29075	1.79128	2.23735	2.46063	1.8797	2.66323	2.47748	2.31481	1.4782	2.35192	1.10723	1.01067	1.40114	1.74459	2.46575	1.33333	1.05088	1.47247	1.47493	1.22601	0.89955	1.58845	2.50941	1.53257	1.98151	1.90074	2.67094	2.32126	2.82353	20.202	9.09091	23.1481	17.7083	11.5385	16.0377	25.5102	12.5	15.5963	14.5631	12	8.42105
13.6	1.21595	1.08443	1.49347	1.74891	1.00211	1.66008	1.92427	3.20285	2.29075	2.57009	2.62646	1.77165	1.50376	1.71821	1.01351	2.77778	1.77384	1.48084	0.932401	0.786075	1.50493	1.53524	2.60274	1.07692	0.940265	1.79257	2.28614	1.01279	1.27436	1.87726	3.01129	1.341	1.98151	1.58395	2.02991	1.67131	4.47059	12.1212	15.1515	13.8889	17.7083	13.4615	14.1509	8.16327	14.4231	11.9266	7.76699	8	13.6842
13.62	1.21595	0.735864	0.622278	0.936914	1.10759	1.42292	1.80012	2.13523	2.64317	2.1028	3.11284	1.67323	1.75439	2.31959	1.68919	3.24074	1.25647	1.91638	1.3986	1.45985	1.66061	1.46546	2.67123	1.02564	0.995575	1.92061	1.62242	1.01279	2.02399	1.87726	2.00753	1.91571	2.11361	1.58395	2.5641	1.85701	4.70588	17.1717	11.1111	14.8148	13.5417	8.65385	12.2642	19.3878	15.3846	12.844	11.6505	14	11.5789
13.64	1.26459	1.0457	1.68015	1.37414	1.42405	1.66008	1.8622	2.2242	2.29075	2.25857	1.55642	2.55906	1.25313	1.6323	3.15315	3.24074	1.33038	2.09059	1.3986	0.95452	1.34925	2.09351	1.84932	1.12821	1.1615	1.02433	1.76991	0.746269	1.49925	1.37184	2.50941	2.20307	2.11361	2.63992	3.31197	2.04271	4.70588	17.1717	17.1717	11.1111	12.5	8.65385	15.0943	20.4082	13.4615	10.0917	10.6796	11	10.5263
13.66	0.972763	0.968242	1.49347	1.87383	1.31857	1.73913	0.869025	2.40214	2.11454	1.86916	1.94553	2.95276	1.25313	1.46048	2.13964	2.9321	0.886918	1.65505	1.04895	1.29141	0.726518	1.32589	2.26027	0.974359	1.05088	1.85659	1.47493	1.75906	2.02399	2.09386	2.25847	1.53257	2.24571	2.11193	1.28205	2.32126	3.52941	8.08081	15.1515	13.8889	20.8333	12.5	9.43396	14.2857	7.69231	8.25688	9.70874	17	16.8421
13.68	1.16732	0.890782	1.43124	0.936914	1.05485	1.58103	1.36561	2.04626	2.73128	1.86916	1.26459	1.77165	2.13033	2.23368	2.13964	2.00617	1.99557	2.00348	1.1655	0.898372	1.40114	1.60502	3.28767	1.69231	1.32743	1.40845	1.9174	0.906183	2.02399	0.938628	2.63488	2.10728	2.50991	2.00634	2.45726	2.13556	3.52941	15.1515	22.2222	19.4444	16.6667	9.61538	11.3208	16.3265	15.3846	9.17431	10.6796	12	18.9474
13.7	1.41051	0.619675	1.30678	1.37414	1.31857	1.97628	1.11732	2.31317	2.55507	2.72586	2.0428	0.885827	2.13033	2.14777	2.7027	2.62346	1.69993	2.09059	1.34033	0.898372	1.03788	1.39567	2.32877	0.923077	1.27212	1.72855	1.10619	1.38593	1.49925	1.73285	2.25847	1.62835	1.321	2.11193	1.60256	1.11421	5.41176	18.1818	17.1717	17.5926	11.4583	9.61538	19.8113	13.2653	8.65385	16.5138	10.6796	10	24.2105
13.72	1.31323	1.00697	1.30678	1.74891	0.843882	1.89723	1.17939	2.04626	2.29075	2.64798	2.62646	1.5748	1.81704	1.46048	1.91441	1.54321	0.886918	1.56794	1.1655	1.29141	1.14167	1.11654	3.15068	1.74359	1.05088	1.40845	1.03245	1.38593	1.42429	1.15523	2.25847	1.43678	1.98151	2.53432	2.88462	1.20706	2.58824	15.1515	16.1616	12.963	15.625	12.5	11.3208	13.2653	12.5	9.17431	15.534	15	10.5263
13.74	0.729572	0.929512	1.49347	1.4366	1.05485	1.73913	1.80012	2.13523	2.64317	2.80374	2.62646	1.37795	1.75439	2.23368	2.47748	2.77778	1.25647	1.48084	1.04895	0.898372	0.985989	1.46546	2.32877	0.871795	1.05088	1.60051	2.13864	1.1194	1.87406	1.73285	1.88206	1.24521	2.24571	2.32313	2.02991	1.20706	6.11765	17.1717	15.1515	11.1111	9.375	12.5	12.2642	12.2449	8.65385	16.5138	9.70874	13	13.6842
13.76	1.07004	0.929512	1.68015	0.874453	0.949367	1.26482	1.6139	1.69039	2.55507	1.94704	2.72374	1.67323	1.50376	2.57732	2.81532	3.24074	1.55211	2.52613	1.34033	0.898372	1.08978	1.25611	3.28767	1.58974	0.995575	1.34443	1.69617	0.692964	1.94903	1.87726	3.3877	2.29885	2.50991	2.42872	2.13675	2.22841	3.05882	13.1313	18.1818	13.8889	9.375	8.65385	15.0943	16.3265	7.69231	11.0092	18.4466	16	15.7895
13.78	1.26459	1.16189	1.1201	1.31168	1.21308	2.13439	1.8622	2.13523	1.4978	2.18069	1.94553	1.37795	1.4411	1.80412	1.91441	2.16049	1.69993	2.09059	0.990676	0.786075	1.24546	2.23308	1.57534	0.923077	0.995575	1.60051	1.25369	1.49254	1.57421	2.23827	1.88206	1.341	3.56671	1.37276	2.35043	1.48561	4.47059	19.1919	15.1515	14.8148	15.625	9.61538	9.43396	13.2653	17.3077	11.9266	8.73786	13	13.6842
13.8	0.826848	0.697134	0.933416	1.24922	1.37131	1.89723	1.42768	2.2242	1.85022	1.86916	2.43191	2.75591	1.62907	2.57732	2.7027	4.01235	1.62602	1.39373	1.80653	1.06682	0.726518	1.53524	2.94521	1.58974	1.1615	1.85659	1.03245	1.59915	1.72414	1.22744	1.75659	0.957854	2.37781	2.00634	1.81624	1.67131	3.52941	14.1414	13.1313	14.8148	13.5417	8.65385	11.3208	11.2245	13.4615	12.844	12.6214	15	12.6316
13.82	0.972763	0.968242	1.05787	1.31168	0.843882	1.50198	1.92427	1.69039	2.20264	2.33645	2.33463	2.16535	1.69173	1.46048	3.04054	3.7037	1.33038	1.56794	1.57343	1.17911	1.24546	1.32589	2.12329	1.12821	0.884956	1.21639	2.35988	1.75906	1.42429	1.87726	1.38018	2.68199	1.84941	2.63992	2.88462	2.13556	4	16.1616	14.1414	19.4444	16.6667	13.4615	14.1509	9.18367	8.65385	12.844	10.6796	18	14.7368
13.84	1.41051	0.852053	1.1201	1.31168	0.791139	1.50198	1.55183	2.13523	1.85022	1.40187	3.01556	1.5748	1.81704	2.57732	2.36486	2.9321	1.18256	1.56794	1.51515	1.6283	1.40114	1.74459	2.60274	1.23077	0.995575	1.34443	1.54867	0.852878	2.02399	1.66065	2.50941	1.341	1.98151	2.42872	2.02991	1.76416	5.17647	10.101	7.07071	14.8148	20.8333	16.3462	11.3208	11.2245	11.5385	15.5963	10.6796	10	11.5789
13.86	0.972763	0.852053	0.995644	1.1243	0.896624	1.58103	1.80012	1.9573	1.93833	1.47975	2.82101	1.47638	1.50376	1.89003	3.26577	2.77778	1.33038	2.00348	1.51515	1.40371	0.934094	1.32589	2.60274	1.4359	0.995575	1.53649	1.84366	1.0661	1.72414	1.73285	2.63488	1.43678	1.71731	1.79514	2.35043	1.29991	3.29412	12.1212	15.1515	14.8148	10.4167	13.4615	26.4151	13.2653	16.3462	11.0092	8.73786	12	17.8947
13.88	0.729572	0.774593	1.05787	1.1243	1.10759	1.50198	1.48976	2.04626	1.40969	2.72586	1.84825	1.87008	1.12782	1.80412	2.36486	2.00617	1.40429	2.09059	1.28205	1.12296	1.86819	1.46546	2.12329	1.12821	0.719027	1.21639	1.25369	1.17271	2.32384	1.73285	2.38394	1.62835	2.90621	1.79514	2.5641	1.67131	3.05882	12.1212	12.1212	4.62963	12.5	11.5385	10.3774	10.2041	14.4231	12.844	11.6505	11	11.5789
13.9	1.11868	0.426026	1.30678	0.999375	0.843882	1.26482	1.48976	2.58007	2.20264	2.49221	2.23735	1.77165	2.06767	1.46048	2.36486	2.62346	1.77384	2.35192	1.10723	1.06682	0.934094	1.32589	2.26027	1.23077	0.608407	0.960307	1.47493	1.33262	1.34933	1.73285	2.133	1.14943	2.64201	1.79514	1.60256	1.39276	4.23529	19.1919	13.1313	6.48148	14.5833	8.65385	13.2075	11.2245	13.4615	13.7615	6.79612	11	7.36842
13.92	0.875486	0.929512	1.1201	1.4366	1.05485	1.58103	1.36561	2.13523	2.02643	1.86916	2.33463	2.3622	1.81704	1.20275	1.12613	2.77778	0.665188	1.48084	1.04895	1.516	1.40114	1.53524	3.0137	1.07692	1.38274	1.92061	1.25369	1.01279	1.94903	1.94946	1.88206	1.72414	3.17041	1.90074	1.17521	0.928505	4.70588	13.1313	19.1919	12.963	12.5	10.5769	3.77358	13.2653	16.3462	16.5138	16.5049	11	10.5263
13.94	1.41051	1.47173	1.1201	0.936914	1.16034	1.18577	1.36561	2.58007	2.11454	1.24611	1.84825	1.27953	1.94236	1.97595	1.8018	2.77778	1.33038	2.26481	1.04895	1.06682	0.726518	1.95394	2.32877	1.07692	1.10619	1.53649	1.9174	1.0661	1.34933	2.38267	2.63488	1.53257	2.11361	1.90074	1.92308	1.76416	4.23529	10.101	12.1212	13.8889	20.8333	7.69231	14.1509	14.2857	9.61538	8.25688	8.73786	15	8.42105
13.96	0.826848	0.697134	1.05787	1.56152	1.37131	1.73913	0.806952	1.15658	2.55507	2.02492	2.23735	1.47638	1.19048	1.11684	1.8018	1.69753	1.77384	2.26481	1.74825	0.95452	1.08978	1.46546	2.32877	1.69231	0.884956	1.21639	1.76991	0.906183	1.12444	1.29964	2.50941	2.01149	2.24571	1.79514	1.81624	1.57846	5.41176	10.101	13.1313	6.48148	17.7083	10.5769	15.0943	18.3673	14.4231	9.17431	8.73786	17	8.42105
13.98	0.924125	1.16189	1.05787	1.68645	1.10759	1.26482	1.67598	1.86833	2.46696	2.64798	1.84825	2.3622	1.62907	2.49141	2.47748	2.31481	1.92166	2.43902	1.1655	1.34756	1.19357	1.39567	2.46575	1.12821	1.32743	1.34443	1.62242	0.852878	1.72414	1.29964	2.133	1.43678	2.11361	2.21753	1.7094	2.13556	6.58824	8.08081	10.101	9.25926	11.4583	21.1538	10.3774	18.3673	12.5	10.0917	10.6796	17	13.6842
14	0.972763	0.697134	1.05787	0.999375	1.05485	1.81818	1.24146	2.04626	1.93833	2.57009	1.94553	1.5748	1.69173	2.14777	1.91441	2.62346	1.84775	1.21951	0.932401	1.12296	0.985989	2.16329	2.67123	1.38462	0.995575	1.53649	1.03245	1.1194	2.02399	1.44404	1.88206	1.62835	2.90621	2.00634	2.13675	1.85701	2.35294	21.2121	11.1111	15.7407	23.9583	12.5	14.1509	8.16327	10.5769	13.7615	12.6214	12	14.7368
14.02	0.875486	0.813323	1.18233	0.999375	1.31857	1.26482	1.17939	2.58007	2.37885	2.80374	1.84825	2.16535	1.69173	1.89003	2.92793	2.46914	1.69993	2.26481	1.28205	1.06682	1.19357	1.74459	2.05479	1.17949	1.27212	1.60051	1.47493	0.799574	1.7991	1.66065	1.38018	1.05364	1.71731	1.90074	1.38889	2.59981	5.17647	15.1515	16.1616	7.40741	15.625	11.5385	15.0943	13.2653	12.5	8.25688	6.79612	11	10.5263
14.04	1.26459	0.852053	1.1201	0.874453	1.05485	1.18577	1.67598	2.93594	2.11454	2.80374	1.84825	1.47638	1.37845	1.46048	1.57658	2.31481	1.4782	1.91638	0.932401	0.95452	1.24546	1.18632	2.19178	1.38462	0.940265	1.60051	2.28614	1.38593	1.1994	1.73285	2.63488	2.20307	1.4531	1.47835	1.92308	2.32126	4.23529	17.1717	20.202	12.037	6.25	7.69231	17.9245	20.4082	21.1538	8.25688	8.73786	15	5.26316
14.06	0.875486	0.735864	1.30678	1.18676	0.474684	1.26482	2.04842	2.31317	1.76211	1.86916	1.55642	2.06693	1.56642	1.89003	2.59009	2.16049	1.77384	2.52613	0.757576	0.95452	1.03788	0.907188	3.69863	1.02564	1.10619	1.53649	1.32743	1.70576	1.1994	1.58845	3.13676	2.49042	2.24571	2.11193	2.13675	2.13556	4	15.1515	20.202	15.7407	9.375	12.5	16.0377	12.2449	13.4615	9.17431	15.534	10	21.0526
14.08	1.21595	0.735864	1.49347	1.37414	1.37131	1.97628	0.806952	1.77936	2.73128	1.79128	2.52918	1.77165	2.19298	1.03093	2.59009	2.16049	1.40429	2.78746	1.22378	0.729927	0.674624	1.53524	2.46575	1.17949	1.10619	1.34443	1.40118	1.22601	1.87406	1.44404	1.38018	1.53257	1.1889	1.16156	2.45726	2.13556	3.05882	8.08081	14.1414	9.25926	16.6667	8.65385	13.2075	19.3878	11.5385	11.0092	10.6796	13	15.7895
14.1	1.31323	1.00697	1.1201	1.93629	1.10759	2.29249	1.6139	1.60142	1.23348	2.02492	2.72374	2.06693	1.31579	2.23368	2.92793	2.00617	1.77384	1.74216	1.22378	0.561482	1.24546	1.39567	2.73973	1.12821	0.829646	1.66453	1.25369	1.27932	1.49925	1.87726	2.76035	1.81992	1.5852	2.11193	1.28205	2.13556	3.76471	13.1313	12.1212	12.037	10.4167	6.73077	18.8679	13.2653	11.5385	9.17431	14.5631	16	16.8421
14.12	1.16732	0.929512	1.36901	1.1243	1.16034	1.66008	1.05525	1.77936	2.81938	1.63551	2.72374	2.16535	1.12782	2.14777	1.91441	2.16049	1.55211	2.09059	1.22378	1.40371	1.45304	1.18632	2.73973	1.33333	0.608407	1.40845	1.84366	1.17271	1.64918	1.87726	3.51317	1.91571	1.5852	1.37276	2.35043	1.11421	3.05882	5.05051	9.09091	22.2222	14.5833	19.2308	12.2642	10.2041	10.5769	11.9266	15.534	17	13.6842
14.14	0.632296	1.08443	1.24456	0.811993	0.896624	1.42292	1.80012	2.40214	2.29075	2.02492	2.43191	1.87008	1.75439	2.49141	1.8018	2.77778	1.25647	2.09059	1.45688	0.95452	1.08978	1.04676	2.87671	1.17949	0.719027	1.02433	1.40118	1.0661	1.72414	2.02166	2.63488	2.29885	2.50991	1.68955	2.35043	1.48561	3.76471	8.08081	16.1616	15.7407	9.375	7.69231	10.3774	15.3061	10.5769	9.17431	7.76699	13	11.5789
14.16	1.0214	0.813323	0.995644	1.1243	1.26582	1.50198	1.73805	0.88968	1.93833	1.55763	2.43191	1.77165	1.50376	2.06186	1.91441	2.77778	1.62602	2.43902	1.22378	0.95452	1.40114	1.53524	2.12329	1.17949	1.1615	1.15237	1.25369	0.959488	1.87406	1.87726	2.133	2.29885	2.11361	2.11193	2.02991	1.67131	2.82353	11.1111	13.1313	7.40741	13.5417	10.5769	14.1509	21.4286	13.4615	5.50459	5.82524	15	13.6842
14.18	0.826848	0.813323	1.1201	1.24922	1.16034	1.97628	1.17939	2.13523	2.11454	2.57009	3.40467	1.67323	1.12782	1.89003	1.57658	2.77778	1.69993	1.82927	1.04895	1.34756	0.934094	1.04676	2.39726	0.923077	0.829646	1.40845	2.0649	1.01279	1.94903	1.80505	1.75659	1.341	2.37781	1.05597	1.92308	1.39276	3.29412	14.1414	12.1212	8.33333	10.4167	8.65385	15.0943	10.2041	9.61538	11.9266	11.6505	11	12.6316
14.2	0.826848	0.503486	1.1201	0.62461	1.10759	0.711462	1.55183	1.24555	1.67401	1.86916	2.0428	2.16535	2.00501	2.74914	2.25225	2.62346	1.03474	2.35192	1.1655	1.23526	0.778412	1.81438	2.67123	1.33333	0.774336	1.53649	1.54867	1.0661	1.7991	2.31047	2.38394	2.49042	0.924703	2.11193	2.35043	1.67131	2.82353	15.1515	17.1717	9.25926	12.5	9.61538	13.2075	13.2653	13.4615	10.0917	14.5631	11	15.7895
14.22	1.11868	1.00697	1.05787	0.999375	1.42405	1.42292	1.55183	2.40214	2.37885	2.18069	2.91829	1.77165	1.56642	1.80412	1.35135	3.24074	1.69993	2.70035	1.51515	1.06682	0.830306	1.11654	3.28767	0.974359	0.995575	1.02433	1.84366	1.17271	1.7991	1.87726	1.88206	1.53257	1.71731	2.11193	1.81624	1.48561	4.70588	11.1111	11.1111	14.8148	10.4167	17.3077	16.0377	14.2857	19.2308	11.9266	11.6505	12	7.36842
14.24	0.875486	0.735864	0.933416	1.49906	1.47679	1.73913	1.17939	2.31317	2.37885	1.55763	2.72374	1.87008	1.50376	1.89003	2.59009	2.9321	1.4782	1.21951	0.932401	1.57215	1.34925	1.04676	2.73973	1.28205	1.05088	1.60051	1.62242	1.1194	2.47376	2.23827	2.00753	1.91571	1.71731	2.00634	1.92308	1.02136	1.64706	12.1212	12.1212	16.6667	15.625	9.61538	11.3208	11.2245	7.69231	8.25688	7.76699	7	12.6316
14.26	1.07004	0.774593	1.55569	0.936914	0.738397	2.21344	1.30354	1.77936	2.73128	2.88162	2.14008	1.87008	1.62907	1.28866	1.8018	2.77778	0.886918	1.0453	1.57343	1.29141	1.19357	1.39567	2.67123	1.02564	0.995575	0.832266	1.69617	1.27932	0.89955	2.31047	3.3877	1.05364	2.90621	2.85111	2.5641	1.39276	4	18.1818	14.1414	13.8889	13.5417	12.5	12.2642	14.2857	18.2692	9.17431	23.301	20	17.8947
14.28	0.437743	0.503486	1.36901	1.1243	0.685654	2.05534	1.24146	2.04626	2.20264	1.55763	2.0428	1.9685	1.69173	2.14777	2.13964	2.00617	1.62602	1.82927	0.874126	1.06682	1.24546	1.46546	1.91781	1.23077	0.995575	1.15237	1.10619	1.43923	0.89955	1.66065	2.00753	1.53257	2.64201	1.90074	1.7094	1.02136	3.76471	11.1111	7.07071	10.1852	10.4167	14.4231	8.49057	13.2653	9.61538	18.3486	13.5922	14	14.7368
14.3	1.50778	0.852053	1.43124	1.4366	0.949367	1.50198	1.05525	1.69039	1.85022	1.55763	2.23735	1.77165	1.75439	1.89003	1.68919	3.08642	1.25647	1.56794	1.10723	1.516	1.50493	1.39567	2.46575	0.923077	1.05088	1.21639	1.32743	0.959488	1.27436	2.02166	1.63112	1.91571	3.03831	2.42872	1.28205	1.85701	3.05882	19.1919	12.1212	17.5926	16.6667	11.5385	12.2642	8.16327	8.65385	9.17431	12.6214	15	10.5263
14.32	1.16732	1.0457	1.24456	1.31168	0.738397	1.58103	1.30354	1.77936	2.02643	2.02492	1.55642	1.5748	1.25313	1.80412	1.68919	1.69753	1.33038	1.30662	1.1655	1.06682	1.34925	1.25611	2.67123	1.07692	0.884956	0.896287	1.03245	1.1194	1.87406	1.37184	1.75659	2.20307	2.90621	2.85111	1.38889	1.29991	3.52941	16.1616	13.1313	11.1111	11.4583	13.4615	9.43396	12.2449	12.5	11.0092	14.5631	11	8.42105
14.34	0.77821	0.735864	1.30678	0.62461	0.791139	2.05534	1.55183	1.9573	2.02643	1.79128	1.45914	0.787402	1.06516	2.49141	1.57658	2.16049	1.84775	1.82927	1.22378	1.29141	1.14167	1.11654	2.60274	0.769231	1.05088	1.34443	1.40118	1.0661	2.09895	1.73285	2.25847	2.10728	2.11361	2.00634	2.02991	1.67131	2.82353	12.1212	16.1616	11.1111	17.7083	17.3077	14.1509	14.2857	12.5	15.5963	10.6796	14	7.36842
14.36	1.11868	0.813323	0.871189	1.18676	0.738397	1.73913	0.869025	2.13523	1.76211	2.25857	2.52918	1.27953	1.25313	1.71821	1.46396	2.77778	1.77384	1.39373	1.04895	0.898372	0.985989	1.39567	2.39726	1.28205	0.995575	1.02433	1.47493	1.43923	1.7991	1.80505	2.76035	1.43678	2.77411	2.21753	1.7094	1.67131	6.35294	15.1515	19.1919	12.037	9.375	18.2692	9.43396	16.3265	9.61538	8.25688	15.534	17	9.47368
14.38	0.972763	0.503486	0.933416	1.18676	0.632911	1.81818	1.80012	2.4911	2.46696	2.1028	1.94553	2.46063	1.12782	2.4055	2.13964	2.46914	1.33038	2.52613	0.874126	1.01067	0.985989	1.60502	2.60274	1.02564	0.774336	1.34443	1.76991	0.692964	2.02399	2.38267	2.00753	1.62835	1.98151	1.79514	2.02991	1.39276	3.52941	18.1818	14.1414	13.8889	11.4583	10.5769	17.9245	7.14286	9.61538	11.9266	8.73786	8	23.1579
14.4	0.826848	0.464756	0.933416	0.936914	0.949367	1.42292	0.993172	2.2242	1.5859	1.94704	2.33463	2.06693	1.25313	1.6323	2.59009	1.85185	1.03474	2.1777	0.641026	0.95452	0.8822	1.11654	2.12329	1.07692	0.663717	1.02433	1.62242	1.38593	1.7991	1.58845	3.13676	1.341	2.64201	1.68955	1.7094	1.11421	3.05882	11.1111	16.1616	9.25926	10.4167	10.5769	12.2642	13.2653	11.5385	13.7615	13.5922	14	13.6842
14.42	1.07004	0.852053	1.24456	1.37414	0.421941	1.66008	1.11732	1.77936	2.46696	1.63551	2.43191	1.47638	1.50376	1.80412	2.13964	3.24074	1.4782	1.91638	1.45688	1.06682	1.29735	1.53524	2.46575	1.23077	0.719027	1.34443	1.69617	1.27932	1.57421	1.73285	1.63112	2.49042	1.84941	1.26716	2.02991	1.94986	2.35294	8.08081	14.1414	10.1852	18.75	5.76923	11.3208	18.3673	14.4231	6.42202	15.534	15	11.5789
14.44	0.535019	0.735864	0.995644	1.37414	1.05485	1.50198	1.24146	1.69039	2.11454	1.86916	2.72374	2.46063	1.56642	1.37457	2.02703	1.85185	1.25647	1.56794	1.10723	0.898372	0.985989	1.18632	2.53425	1.12821	0.719027	1.02433	1.47493	0.852878	1.72414	1.51625	3.13676	1.62835	1.0568	1.26716	1.81624	1.76416	4.23529	9.09091	10.101	10.1852	9.375	8.65385	14.1509	15.3061	8.65385	5.50459	12.6214	9	15.7895
14.46	0.77821	0.464756	1.68015	0.936914	1.16034	1.58103	0.931099	1.60142	2.37885	1.94704	2.14008	2.46063	1.12782	2.4055	2.02703	3.08642	1.77384	1.74216	1.04895	1.34756	0.778412	1.39567	1.9863	1.23077	0.884956	1.53649	1.40118	1.27932	1.27436	1.73285	2.133	1.341	2.11361	0.95037	2.24359	1.76416	2.58824	12.1212	13.1313	6.48148	12.5	13.4615	12.2642	16.3265	7.69231	9.17431	12.6214	23	22.1053
14.48	0.632296	0.619675	1.30678	0.936914	1.00211	1.50198	1.30354	2.13523	1.23348	1.86916	2.82101	2.16535	1.37845	1.97595	2.7027	2.62346	1.33038	1.74216	0.699301	1.45985	1.14167	1.25611	2.46575	1.12821	1.21681	1.34443	1.84366	1.17271	1.64918	1.80505	1.88206	2.39464	1.5852	0.844773	1.28205	1.76416	3.05882	10.101	11.1111	13.8889	11.4583	12.5	14.1509	14.2857	5.76923	12.844	9.70874	13	12.6316
14.5	0.972763	0.658404	0.995644	1.37414	1.16034	1.73913	0.931099	1.33452	2.46696	1.86916	2.43191	1.27953	1.75439	1.71821	1.35135	1.69753	1.40429	1.82927	1.28205	0.617631	1.60872	1.39567	1.9863	1.38462	0.940265	1.47247	1.40118	0.426439	1.34933	1.29964	3.01129	1.81992	1.98151	1.16156	1.92308	1.11421	3.76471	12.1212	11.1111	6.48148	15.625	15.3846	11.3208	10.2041	15.3846	10.0917	19.4175	17	9.47368
14.52	0.535019	0.503486	1.05787	1.18676	1.42405	2.21344	1.30354	1.15658	2.55507	2.25857	1.84825	2.55906	1.4411	1.28866	1.68919	1.69753	1.69993	1.48084	1.45688	1.06682	0.8822	0.837404	2.80822	1.02564	0.995575	1.28041	0.958702	0.959488	1.57421	1.87726	1.63112	1.72414	1.5852	1.47835	1.7094	0.928505	3.29412	10.101	13.1313	14.8148	12.5	14.4231	13.2075	14.2857	7.69231	11.0092	9.70874	20	9.47368
14.54	0.680934	0.697134	1.49347	0.874453	0.949367	0.869565	1.17939	1.77936	1.76211	1.40187	2.0428	1.67323	1.4411	1.97595	2.02703	3.08642	1.18256	1.30662	0.757576	0.673779	1.14167	0.976971	2.39726	0.923077	0.497788	1.28041	1.10619	1.01279	1.34933	1.73285	2.63488	1.43678	1.0568	1.26716	1.49573	0.835655	3.76471	14.1414	11.1111	10.1852	15.625	10.5769	13.2075	17.3469	7.69231	11.9266	8.73786	20	10.5263
14.56	0.826848	0.464756	1.36901	1.49906	0.896624	1.58103	1.36561	1.51246	1.4978	1.32399	1.07004	2.3622	1.37845	1.97595	1.91441	2.9321	1.62602	1.65505	1.28205	1.01067	0.62273	1.46546	2.12329	1.28205	0.719027	0.832266	1.32743	0.799574	1.57421	1.37184	1.88206	1.43678	2.11361	1.58395	1.81624	1.67131	3.29412	9.09091	12.1212	6.48148	7.29167	8.65385	12.2642	13.2653	14.4231	9.17431	10.6796	15	9.47368
14.58	0.826848	0.929512	1.49347	0.999375	0.843882	1.26482	0.869025	2.84698	2.02643	1.24611	2.52918	1.87008	1.50376	1.89003	2.59009	2.77778	1.25647	1.65505	1.74825	0.729927	0.570835	0.976971	2.19178	1.38462	1.05088	1.15237	2.35988	1.43923	1.04948	2.02166	2.00753	1.341	2.64201	2.11193	2.67094	1.76416	3.29412	8.08081	7.07071	8.33333	10.4167	12.5	19.8113	15.3061	10.5769	9.17431	12.6214	13	11.5789
14.6	0.680934	0.619675	0.808961	1.06184	1.21308	1.26482	1.42768	1.24555	1.4978	2.33645	2.43191	1.9685	0.877193	1.6323	1.8018	2.31481	1.40429	1.91638	1.10723	1.12296	0.985989	1.32589	3.08219	0.974359	0.774336	1.21639	2.21239	1.22601	1.34933	1.37184	2.63488	1.81992	1.321	2.74551	1.60256	2.04271	3.76471	11.1111	15.1515	8.33333	11.4583	14.4231	7.54717	10.2041	10.5769	12.844	13.5922	9	13.6842
14.62	1.07004	0.774593	1.43124	1.62399	0.791139	1.10672	1.55183	1.9573	2.46696	1.40187	2.33463	1.08268	1.19048	1.97595	2.02703	1.85185	1.10865	1.91638	0.757576	1.45985	1.29735	1.39567	1.50685	0.923077	1.10619	1.40845	1.99115	1.01279	1.94903	1.94946	1.00376	2.29885	1.98151	2.63992	2.5641	1.48561	4.70588	20.202	8.08081	12.963	19.7917	8.65385	7.54717	21.4286	13.4615	11.9266	4.85437	7	13.6842
14.64	1.11868	0.890782	1.30678	1.87383	1.21308	1.58103	0.806952	1.60142	1.4978	2.41433	1.26459	1.67323	1.69173	1.28866	1.35135	1.85185	1.55211	1.21951	0.874126	0.561482	1.08978	1.25611	3.08219	0.717949	1.49336	0.768246	1.54867	0.959488	1.64918	1.37184	2.133	1.43678	1.98151	1.79514	1.06838	1.20706	2.82353	15.1515	5.05051	14.8148	11.4583	19.2308	15.0943	10.2041	7.69231	14.6789	12.6214	12	16.8421
14.66	0.826848	0.697134	1.1201	1.62399	1.05485	1.10672	1.36561	1.33452	1.85022	1.63551	2.91829	1.9685	1.12782	1.89003	1.8018	2.46914	1.69993	1.82927	0.990676	1.12296	0.985989	1.46546	1.91781	0.974359	0.995575	1.08835	1.25369	1.17271	1.27436	1.44404	1.38018	2.20307	2.11361	1.90074	1.92308	1.11421	4.47059	7.07071	14.1414	12.037	3.125	6.73077	11.3208	19.3878	6.73077	8.25688	5.82524	12	14.7368
14.68	0.972763	0.774593	1.05787	0.312305	0.949367	0.948617	1.48976	2.04626	1.40969	1.7134	1.84825	1.37795	0.814536	1.20275	1.57658	2.31481	1.33038	1.1324	1.04895	1.17911	0.985989	1.53524	2.19178	1.12821	0.553097	1.28041	1.69617	1.0661	1.57421	2.02166	0.752823	1.72414	2.24571	1.58395	2.45726	1.11421	3.29412	15.1515	12.1212	5.55556	11.4583	9.61538	14.1509	15.3061	17.3077	15.5963	10.6796	16	2.10526
14.7	0.924125	0.697134	1.1201	1.37414	1.05485	1.02767	1.17939	1.51246	1.76211	1.63551	2.0428	1.1811	1.56642	1.71821	1.68919	2.46914	1.25647	1.74216	1.22378	1.17911	1.03788	0.837404	2.73973	0.974359	1.10619	1.02433	1.62242	0.906183	1.64918	1.29964	3.01129	2.49042	1.84941	2.32313	2.02991	1.57846	3.29412	16.1616	16.1616	16.6667	15.625	7.69231	11.3208	15.3061	17.3077	16.5138	12.6214	15	16.8421
14.72	0.826848	0.697134	1.1201	0.749532	0.527426	1.42292	1.24146	2.13523	2.37885	2.72586	1.36187	0.885827	1.00251	2.06186	2.13964	2.16049	1.40429	1.30662	0.524476	0.842223	1.03788	1.67481	1.9863	1.17949	0.995575	1.15237	1.99115	0.586354	1.42429	1.51625	2.00753	1.62835	2.37781	1.58395	2.45726	1.67131	4	15.1515	17.1717	10.1852	13.5417	13.4615	15.0943	11.2245	10.5769	8.25688	11.6505	14	20
14.74	1.41051	0.464756	1.24456	0.749532	1.26582	1.26482	1.48976	2.04626	1.76211	1.79128	1.45914	1.47638	1.19048	2.14777	2.13964	2.31481	1.92166	2.09059	1.04895	0.95452	0.8822	1.39567	2.73973	1.23077	1.05088	1.60051	1.17994	1.0661	1.72414	1.94946	1.88206	1.53257	2.37781	1.90074	1.60256	2.69266	4.70588	10.101	18.1818	16.6667	17.7083	13.4615	4.71698	13.2653	12.5	15.5963	9.70874	11	16.8421
14.76	0.632296	0.735864	0.746733	1.31168	0.949367	1.58103	1.05525	1.86833	2.46696	1.79128	1.55642	1.27953	1.06516	2.06186	2.59009	2.77778	1.40429	1.65505	0.990676	1.57215	0.830306	1.53524	2.60274	1.23077	0.995575	0.960307	1.10619	1.54584	1.49925	1.51625	1.88206	1.341	1.84941	1.90074	2.02991	2.22841	3.52941	17.1717	12.1212	8.33333	8.33333	4.80769	16.0377	12.2449	15.3846	11.9266	14.5631	13	12.6316
14.78	0.826848	0.658404	1.68015	1.4366	1.47679	1.34387	1.67598	1.86833	1.5859	1.94704	1.55642	0.984252	1.69173	2.74914	1.23874	3.08642	1.03474	1.48084	1.34033	1.57215	0.8822	1.04676	2.05479	1.33333	1.21681	1.34443	1.62242	1.17271	1.42429	1.73285	2.38394	1.24521	2.37781	2.85111	2.13675	1.57846	4.70588	12.1212	20.202	11.1111	17.7083	7.69231	12.2642	22.449	16.3462	17.4312	8.73786	12	9.47368
14.8	0.924125	0.852053	0.995644	1.56152	1.31857	1.42292	1.48976	0.978648	1.67401	2.33645	1.26459	1.5748	1.37845	1.80412	1.35135	2.31481	1.18256	1.48084	0.874126	0.95452	0.934094	1.39567	2.26027	0.974359	0.497788	1.21639	1.54867	1.01279	1.64918	1.73285	2.50941	2.87356	2.64201	2.42872	2.02991	1.76416	4.23529	15.1515	17.1717	16.6667	11.4583	7.69231	9.43396	18.3673	12.5	10.0917	13.5922	15	20
14.82	0.972763	0.464756	1.1201	1.4366	0.791139	1.81818	1.42768	2.04626	1.67401	1.63551	1.55642	1.77165	2.06767	1.46048	1.91441	1.85185	1.62602	1.65505	1.1655	1.29141	1.08978	1.11654	1.84932	0.974359	0.719027	0.832266	1.76991	0.959488	1.42429	1.37184	3.3877	1.81992	0.924703	1.90074	1.17521	1.76416	3.76471	17.1717	8.08081	23.1481	17.7083	13.4615	15.0943	24.4898	14.4231	9.17431	10.6796	12	14.7368
14.84	0.729572	0.813323	0.995644	1.18676	1.16034	1.50198	1.30354	1.9573	2.02643	1.55763	1.07004	1.37795	1.37845	1.54639	1.8018	3.39506	0.960828	2.52613	1.34033	0.95452	0.8822	1.81438	2.39726	1.12821	0.884956	0.960307	1.47493	0.533049	1.34933	1.22744	1.75659	1.72414	1.98151	1.47835	1.38889	1.57846	5.64706	13.1313	17.1717	12.037	9.375	3.84615	7.54717	21.4286	12.5	10.0917	11.6505	10	12.6316
14.86	0.77821	0.697134	0.933416	0.936914	0.896624	1.34387	1.05525	1.86833	2.11454	2.18069	2.82101	2.55906	1.25313	1.11684	1.12613	3.08642	1.33038	2.70035	1.04895	1.29141	1.08978	1.60502	2.60274	0.923077	0.940265	1.72855	1.76991	1.17271	2.17391	1.80505	1.75659	1.91571	1.321	1.58395	1.81624	2.97122	3.52941	12.1212	12.1212	11.1111	14.5833	13.4615	9.43396	26.5306	15.3846	13.7615	17.4757	16	11.5789
14.88	0.875486	0.580945	1.24456	1.1243	1.21308	2.13439	1.17939	1.9573	2.11454	2.18069	2.23735	1.77165	1.4411	2.49141	1.68919	2.16049	1.18256	1.82927	0.582751	1.06682	0.830306	1.60502	2.46575	0.974359	0.940265	1.15237	1.32743	1.22601	1.57421	1.15523	2.76035	1.341	1.98151	1.68955	2.13675	1.20706	5.17647	15.1515	6.06061	5.55556	11.4583	14.4231	14.1509	17.3469	4.80769	14.6789	11.6505	10	16.8421
14.9	0.972763	0.580945	0.933416	1.24922	1.05485	1.73913	1.30354	2.04626	1.4978	2.33645	2.0428	1.1811	0.689223	2.57732	2.81532	3.39506	0.813008	2.43902	1.45688	0.842223	0.934094	1.18632	2.39726	0.820513	0.829646	1.53649	1.69617	1.27932	1.57421	1.80505	1.75659	1.53257	2.37781	2.32313	1.92308	1.85701	5.64706	15.1515	13.1313	11.1111	10.4167	18.2692	10.3774	14.2857	13.4615	20.1835	7.76699	12	14.7368
14.92	1.0214	0.813323	0.808961	1.18676	0.896624	1.26482	1.42768	1.69039	2.20264	1.86916	1.84825	1.9685	1.75439	1.97595	1.57658	2.16049	1.4782	1.56794	0.582751	0.786075	1.40114	0.907188	2.80822	1.02564	1.38274	1.34443	1.10619	1.0661	1.34933	1.58845	1.88206	1.53257	2.77411	3.1679	1.06838	1.39276	4.70588	7.07071	16.1616	11.1111	19.7917	10.5769	8.49057	13.2653	8.65385	13.7615	6.79612	10	13.6842
14.94	0.875486	0.813323	0.622278	0.811993	0.896624	0.869565	1.48976	2.13523	1.4978	2.02492	1.84825	1.5748	1.4411	2.31959	2.36486	2.46914	0.517369	1.0453	0.932401	1.23526	0.830306	1.46546	2.87671	1.28205	0.884956	0.960307	1.25369	0.852878	1.49925	1.08303	1.75659	1.341	2.11361	1.79514	0.961538	1.48561	3.05882	20.202	15.1515	11.1111	15.625	9.61538	8.49057	13.2653	11.5385	13.7615	7.76699	11	14.7368
14.96	1.16732	0.735864	1.05787	1.18676	0.949367	1.50198	1.48976	1.24555	1.5859	2.25857	2.14008	1.5748	1.19048	1.6323	2.7027	1.38889	1.10865	1.82927	0.699301	0.95452	0.8822	0.837404	2.26027	1.33333	0.884956	1.47247	0.958702	1.01279	1.49925	1.15523	2.50941	2.01149	2.11361	1.05597	1.92308	1.39276	4.47059	12.1212	13.1313	7.40741	18.75	19.2308	10.3774	5.10204	7.69231	16.5138	12.6214	12	15.7895
14.98	0.77821	0.658404	1.05787	0.999375	1.05485	1.42292	1.36561	2.04626	1.5859	1.47975	1.75097	1.27953	0.814536	1.54639	1.8018	3.08642	1.18256	1.82927	0.990676	1.06682	1.40114	1.74459	2.67123	1.17949	0.884956	0.960307	0.884956	1.33262	1.57421	2.38267	2.88582	1.14943	2.24571	2.21753	1.92308	1.48561	2.35294	13.1313	13.1313	10.1852	16.6667	18.2692	10.3774	13.2653	9.61538	9.17431	14.5631	14	12.6316
15	0.924125	0.542215	1.18233	0.687071	1.26582	0.948617	1.24146	1.42349	1.4978	2.02492	1.07004	1.67323	1.69173	1.6323	1.68919	3.54938	0.960828	1.91638	0.524476	1.01067	0.985989	0.976971	2.32877	0.769231	0.884956	0.960307	1.25369	0.959488	1.49925	1.08303	1.50565	2.29885	2.64201	1.26716	1.38889	1.57846	2.82353	15.1515	10.101	10.1852	13.5417	12.5	10.3774	14.2857	12.5	16.5138	15.534	16	17.8947
15.02	0.680934	0.852053	0.871189	1.31168	0.949367	1.18577	1.48976	1.42349	1.32159	1.32399	1.75097	1.27953	1.12782	2.31959	1.35135	1.54321	1.4782	1.39373	0.815851	0.786075	0.934094	1.74459	1.91781	1.07692	0.940265	1.28041	1.9174	0.959488	1.72414	1.29964	1.75659	1.91571	2.24571	1.26716	2.13675	1.48561	3.52941	9.09091	11.1111	12.963	15.625	10.5769	10.3774	12.2449	6.73077	5.50459	13.5922	12	12.6316
15.04	0.924125	0.503486	1.43124	1.06184	1.00211	2.05534	1.55183	2.13523	1.85022	1.55763	2.0428	1.87008	1.37845	1.54639	3.15315	2.46914	1.25647	1.65505	0.874126	0.673779	0.674624	0.837404	2.60274	1.33333	0.995575	0.704225	1.17994	0.959488	1.49925	1.66065	1.38018	1.62835	3.03831	1.90074	1.60256	1.85701	3.29412	6.06061	13.1313	6.48148	12.5	8.65385	11.3208	13.2653	18.2692	10.0917	5.82524	16	13.6842
15.06	0.632296	0.580945	1.1201	1.24922	1.10759	1.66008	1.36561	2.40214	1.4978	2.1028	2.23735	0.885827	1.75439	2.06186	2.02703	2.31481	1.92166	1.48084	0.932401	1.23526	0.778412	1.39567	2.46575	1.23077	0.884956	0.768246	1.10619	1.01279	1.49925	1.58845	1.63112	1.72414	2.64201	1.05597	1.92308	1.76416	3.76471	15.1515	12.1212	12.037	18.75	14.4231	11.3208	13.2653	10.5769	8.25688	9.70874	17	4.21053
15.08	0.875486	0.658404	0.746733	1.62399	0.738397	0.395257	0.993172	1.9573	2.37885	1.24611	2.52918	1.27953	1.56642	2.23368	1.91441	2.62346	1.62602	1.48084	1.28205	0.786075	1.40114	1.39567	2.80822	0.769231	1.05088	0.832266	1.69617	0.586354	0.89955	1.37184	1.25471	1.05364	1.5852	1.58395	1.92308	1.11421	4.70588	12.1212	9.09091	15.7407	9.375	12.5	11.3208	18.3673	9.61538	15.5963	6.79612	13	13.6842
15.1	0.826848	0.735864	0.56005	0.999375	0.685654	1.73913	1.42768	1.69039	0.881057	1.40187	1.6537	0.787402	1.25313	0.515464	2.47748	2.9321	1.03474	1.91638	1.45688	1.45985	0.985989	0.976971	2.60274	0.769231	0.884956	0.832266	0.884956	1.49254	1.72414	1.22744	1.63112	1.24521	1.98151	2.00634	1.81624	1.20706	2.82353	11.1111	14.1414	6.48148	13.5417	14.4231	14.1509	4.08163	6.73077	12.844	10.6796	12	15.7895
15.12	0.826848	0.929512	0.746733	0.749532	0.896624	0.790514	1.11732	1.77936	1.23348	1.55763	2.72374	1.37795	1.31579	2.23368	1.12613	2.00617	0.886918	1.74216	0.990676	0.898372	0.830306	1.32589	2.67123	0.769231	1.05088	0.960307	0.884956	1.33262	1.12444	1.22744	0.878294	1.53257	1.84941	2.21753	1.60256	1.48561	2.82353	9.09091	10.101	12.037	15.625	11.5385	8.49057	12.2449	5.76923	8.25688	12.6214	19	17.8947
15.14	0.77821	0.697134	0.746733	0.62461	1.16034	1.26482	1.6139	1.60142	2.11454	2.02492	1.94553	1.9685	1.37845	1.11684	2.13964	2.77778	1.55211	1.0453	0.932401	1.06682	0.8822	1.67481	1.64384	1.02564	0.829646	1.40845	1.47493	1.01279	1.57421	1.44404	2.38394	1.91571	1.84941	1.90074	2.02991	2.04271	4	13.1313	8.08081	16.6667	7.29167	10.5769	10.3774	12.2449	6.73077	9.17431	6.79612	9	13.6842
15.16	0.680934	0.503486	0.808961	0.749532	1.10759	0.869565	1.17939	1.42349	1.93833	1.86916	1.16732	1.1811	1.4411	1.89003	1.23874	2.9321	1.55211	2.09059	1.04895	0.505334	0.674624	1.46546	2.26027	0.564103	0.829646	1.21639	1.40118	1.1194	1.1994	1.73285	2.63488	1.341	1.71731	1.90074	1.49573	1.94986	3.76471	14.1414	16.1616	10.1852	16.6667	8.65385	10.3774	9.18367	11.5385	6.42202	9.70874	11	11.5789
15.18	1.07004	0.697134	1.18233	0.874453	0.738397	1.73913	1.6139	1.60142	2.37885	1.86916	1.36187	1.37795	1.50376	1.80412	1.57658	2.00617	1.62602	1.21951	0.757576	1.12296	0.934094	1.32589	2.87671	0.820513	0.719027	0.896287	1.25369	1.1194	1.12444	1.58845	1.75659	1.43678	2.11361	1.79514	1.17521	1.67131	4.47059	14.1414	13.1313	14.8148	15.625	16.3462	11.3208	12.2449	8.65385	8.25688	6.79612	15	9.47368
15.2	0.632296	0.735864	0.622278	0.811993	0.791139	1.66008	0.993172	1.86833	1.67401	1.16822	2.82101	1.08268	1.06516	1.6323	2.13964	3.24074	1.10865	1.82927	0.874126	1.29141	0.570835	1.32589	2.32877	1.12821	0.663717	1.02433	1.54867	0.692964	1.12444	1.15523	2.133	2.20307	1.5852	1.68955	1.7094	1.20706	4.47059	16.1616	22.2222	11.1111	12.5	13.4615	6.60377	11.2245	14.4231	9.17431	10.6796	15	16.8421
15.22	0.340467	0.697134	0.746733	1.06184	1.16034	1.26482	0.993172	1.51246	2.37885	2.72586	1.6537	1.27953	2.00501	1.46048	1.01351	1.85185	0.813008	1.48084	1.04895	0.449186	0.830306	0.907188	3.08219	0.717949	1.21681	0.768246	1.54867	0.479744	1.72414	1.80505	1.63112	1.43678	2.37781	2.42872	2.24359	1.94986	3.52941	7.07071	17.1717	11.1111	21.875	9.61538	10.3774	19.3878	11.5385	17.4312	9.70874	14	7.36842
15.24	0.924125	0.774593	0.933416	0.749532	0.896624	0.948617	1.36561	1.69039	2.46696	1.55763	2.14008	0.885827	1.25313	2.4055	2.47748	3.08642	1.10865	1.30662	0.757576	1.17911	0.62273	1.32589	2.87671	0.871795	1.10619	0.768246	1.54867	1.17271	1.04948	1.51625	2.38394	1.14943	1.98151	1.47835	1.7094	1.57846	4	14.1414	11.1111	13.8889	8.33333	12.5	13.2075	15.3061	6.73077	13.7615	9.70874	10	11.5789
15.26	1.16732	0.542215	0.995644	0.874453	0.738397	1.89723	1.42768	2.13523	1.4978	1.63551	2.14008	1.9685	1.00251	1.54639	1.46396	2.16049	1.69993	1.56794	1.28205	0.617631	0.674624	1.32589	2.73973	0.974359	0.553097	1.40845	1.47493	1.54584	1.87406	1.44404	3.13676	1.81992	2.24571	1.58395	1.81624	1.29991	3.05882	7.07071	12.1212	12.963	11.4583	14.4231	10.3774	10.2041	8.65385	13.7615	10.6796	12	12.6316
15.28	0.632296	0.697134	1.1201	1.06184	0.421941	1.50198	0.869025	1.77936	2.02643	1.32399	1.36187	1.87008	1.06516	1.54639	1.57658	2.16049	1.33038	1.1324	0.932401	1.01067	0.934094	1.46546	2.12329	1.12821	0.829646	1.08835	1.69617	0.959488	1.12444	1.66065	2.38394	1.91571	2.37781	0.739176	2.24359	1.76416	4	11.1111	16.1616	9.25926	11.4583	11.5385	9.43396	11.2245	11.5385	15.5963	10.6796	6	9.47368
15.3	0.924125	0.735864	1.55569	1.81137	0.949367	1.50198	0.806952	1.77936	1.67401	1.55763	1.16732	1.77165	1.50376	2.06186	2.59009	1.54321	1.40429	1.56794	1.04895	0.729927	0.8822	1.25611	1.91781	0.974359	0.829646	1.08835	1.40118	0.852878	1.27436	1.80505	1.75659	1.24521	1.98151	2.00634	0.42735	1.67131	3.76471	20.202	18.1818	12.037	13.5417	12.5	8.49057	17.3469	5.76923	9.17431	11.6505	6	16.8421
15.32	0.77821	0.735864	1.05787	1.31168	0.949367	1.18577	0.993172	1.86833	1.76211	1.63551	2.72374	1.67323	1.37845	1.6323	1.91441	2.9321	0.739098	2.1777	1.3986	1.01067	1.03788	1.04676	2.87671	0.923077	0.553097	1.60051	1.76991	0.746269	1.12444	1.37184	2.38394	1.72414	3.30251	1.47835	2.77778	1.29991	5.88235	9.09091	16.1616	10.1852	14.5833	11.5385	8.49057	15.3061	10.5769	8.25688	11.6505	13	12.6316
15.34	0.875486	0.580945	1.05787	1.31168	0.843882	1.10672	1.05525	1.33452	1.4978	2.02492	2.52918	1.08268	1.19048	1.54639	1.35135	2.77778	1.25647	1.21951	0.699301	0.898372	0.570835	0.976971	2.60274	1.33333	0.884956	0.768246	1.47493	1.54584	1.42429	1.22744	1.63112	1.91571	1.5852	1.79514	2.99145	1.94986	5.64706	8.08081	6.06061	11.1111	11.4583	11.5385	9.43396	16.3265	12.5	10.0917	12.6214	10	15.7895
15.36	0.924125	0.735864	0.808961	0.936914	0.949367	0.711462	1.24146	1.69039	1.67401	1.47975	1.75097	1.1811	1.00251	1.97595	1.91441	2.16049	1.33038	1.56794	0.757576	0.729927	0.62273	1.53524	2.19178	1.17949	0.940265	0.704225	1.25369	1.0661	1.42429	0.866426	2.76035	1.24521	1.71731	2.32313	1.49573	1.02136	5.41176	11.1111	9.09091	11.1111	11.4583	11.5385	17.9245	16.3265	4.80769	6.42202	16.5049	10	11.5789
15.38	0.875486	0.619675	0.995644	1.56152	0.791139	1.02767	1.48976	2.04626	1.5859	1.55763	2.14008	1.47638	1.19048	1.37457	1.8018	1.08025	1.4782	2.00348	0.990676	1.06682	1.08978	1.74459	2.19178	0.974359	0.331858	1.28041	0.884956	1.0661	2.32384	2.02166	1.88206	1.341	2.77411	2.00634	1.7094	1.57846	4.47059	10.101	15.1515	10.1852	16.6667	15.3846	12.2642	19.3878	10.5769	12.844	12.6214	14	13.6842
15.4	0.826848	0.813323	1.05787	1.1243	0.791139	0.948617	1.05525	2.66904	1.85022	1.86916	2.0428	1.67323	1.06516	1.20275	2.25225	2.16049	1.62602	1.91638	1.34033	0.95452	0.674624	0.976971	2.19178	0.974359	1.49336	1.08835	0.958702	1.43923	1.94903	1.01083	2.38394	1.91571	2.11361	1.90074	1.81624	1.29991	2.82353	11.1111	14.1414	12.037	13.5417	14.4231	16.0377	18.3673	9.61538	11.0092	10.6796	18	11.5789
15.42	0.875486	0.619675	0.746733	1.18676	1.05485	1.10672	0.993172	1.86833	2.02643	1.94704	2.0428	1.1811	1.56642	1.54639	1.46396	2.46914	1.33038	1.65505	0.874126	1.06682	0.518941	2.09351	2.73973	1.23077	0.940265	0.960307	1.62242	1.1194	1.04948	1.73285	1.75659	1.91571	1.4531	1.16156	1.7094	2.04271	5.17647	18.1818	8.08081	13.8889	17.7083	17.3077	9.43396	20.4082	14.4231	11.0092	10.6796	14	16.8421
15.44	1.07004	0.890782	0.995644	0.874453	1.26582	1.34387	1.05525	1.33452	1.85022	1.40187	1.84825	1.27953	1.31579	1.6323	2.02703	2.9321	1.40429	1.65505	0.874126	0.898372	0.778412	1.39567	2.32877	1.07692	0.995575	1.40845	2.13864	1.65245	2.02399	1.44404	3.13676	1.341	1.84941	2.00634	2.02991	1.57846	4.47059	11.1111	11.1111	12.037	9.375	11.5385	15.0943	16.3265	7.69231	8.25688	15.534	12	12.6316
15.46	0.729572	0.658404	0.995644	0.687071	0.949367	2.13439	1.36561	2.13523	1.93833	1.63551	2.0428	2.16535	1.69173	1.46048	2.59009	2.46914	0.813008	1.21951	0.932401	1.23526	0.62273	0.76762	2.19178	1.07692	0.774336	1.66453	1.84366	1.22601	1.57421	1.37184	1.38018	1.72414	1.71731	1.05597	1.92308	2.22841	3.76471	11.1111	11.1111	14.8148	11.4583	14.4231	8.49057	17.3469	13.4615	14.6789	10.6796	10	11.5789
15.48	0.729572	0.542215	0.808961	1.1243	1.31857	1.42292	1.05525	2.40214	1.67401	1.16822	1.6537	1.5748	1.4411	1.46048	2.02703	3.7037	1.10865	2.00348	0.699301	0.95452	1.03788	1.11654	3.15068	1.12821	1.10619	0.896287	1.10619	0.746269	1.64918	1.87726	2.38394	1.24521	3.69881	1.47835	2.02991	2.13556	2.58824	8.08081	18.1818	12.037	12.5	11.5385	5.66038	15.3061	11.5385	7.33945	11.6505	7	8.42105
15.5	0.680934	0.503486	1.1201	1.06184	0.791139	1.18577	1.30354	2.4911	1.85022	1.79128	1.55642	0.885827	1.81704	1.71821	1.8018	2.77778	0.886918	1.48084	0.757576	0.842223	0.62273	1.53524	2.46575	1.17949	0.663717	1.21639	1.9174	0.852878	0.974513	1.37184	1.50565	1.43678	1.5852	1.90074	1.17521	1.29991	2.58824	14.1414	19.1919	11.1111	10.4167	6.73077	11.3208	16.3265	12.5	6.42202	9.70874	6	14.7368
15.52	0.632296	0.658404	1.18233	0.811993	0.843882	1.66008	0.993172	1.86833	2.02643	2.1028	2.0428	2.06693	1.37845	1.20275	1.8018	2.00617	1.33038	1.74216	0.815851	0.842223	1.08978	0.837404	2.73973	1.02564	0.884956	1.08835	1.03245	0.799574	1.49925	1.58845	2.63488	1.43678	1.321	1.68955	1.92308	1.39276	4.47059	15.1515	12.1212	11.1111	13.5417	11.5385	13.2075	19.3878	6.73077	12.844	8.73786	12	16.8421
15.54	0.729572	0.426026	1.36901	0.874453	0.843882	1.50198	1.48976	2.2242	2.20264	2.1028	0.972763	1.67323	1.06516	1.89003	1.91441	2.00617	1.10865	2.00348	1.04895	0.842223	1.03788	0.697837	2.46575	1.07692	0.497788	0.704225	2.21239	0.533049	2.02399	1.51625	1.75659	1.341	2.64201	2.42872	2.02991	1.67131	4	13.1313	10.101	9.25926	10.4167	6.73077	10.3774	8.16327	11.5385	10.0917	10.6796	17	12.6316
15.56	0.972763	0.348567	0.933416	1.06184	0.632911	1.89723	1.17939	2.58007	2.11454	1.40187	1.16732	1.5748	1.19048	1.28866	1.8018	2.62346	1.40429	1.56794	0.932401	0.617631	1.14167	1.25611	2.73973	0.871795	0.884956	1.02433	1.62242	0.746269	1.12444	1.87726	1.50565	2.01149	2.24571	2.00634	1.49573	1.76416	4.23529	7.07071	8.08081	10.1852	11.4583	9.61538	11.3208	13.2653	19.2308	12.844	8.73786	14	20
15.58	0.875486	0.929512	1.68015	1.4366	0.791139	1.66008	1.30354	2.13523	1.05727	2.18069	1.94553	2.26378	1.37845	1.80412	1.46396	1.69753	1.92166	1.39373	0.874126	0.505334	0.518941	0.907188	2.67123	0.820513	0.829646	0.832266	1.32743	1.0661	1.72414	1.22744	1.75659	2.10728	1.98151	1.05597	1.7094	1.11421	3.29412	8.08081	14.1414	12.037	12.5	7.69231	10.3774	14.2857	12.5	9.17431	14.5631	8	12.6316
15.6	0.632296	0.658404	0.995644	0.811993	0.843882	0.869565	1.24146	0.978648	1.23348	2.64798	1.84825	1.67323	1.94236	1.46048	2.36486	2.46914	0.886918	1.39373	1.51515	0.561482	1.03788	0.558269	2.80822	1.17949	0.719027	1.02433	1.25369	0.799574	1.12444	1.80505	1.63112	2.20307	1.321	0.95037	2.02991	2.13556	3.29412	13.1313	15.1515	7.40741	10.4167	9.61538	16.0377	14.2857	13.4615	11.9266	13.5922	8	10.5263
15.62	1.07004	0.542215	1.18233	0.562149	0.791139	1.02767	1.24146	1.33452	1.4978	1.86916	2.52918	1.77165	1.19048	1.71821	1.23874	1.54321	1.03474	1.91638	0.641026	0.505334	0.467047	1.18632	2.39726	0.871795	0.608407	0.768246	0.958702	0.852878	1.27436	1.37184	1.50565	0.862069	2.50991	1.47835	2.13675	1.02136	3.52941	10.101	15.1515	13.8889	11.4583	12.5	10.3774	15.3061	10.5769	6.42202	9.70874	6	13.6842
15.64	0.437743	1.08443	0.746733	1.24922	0.738397	1.18577	0.806952	1.69039	1.93833	1.63551	2.52918	1.5748	1.06516	1.54639	2.59009	2.00617	1.25647	1.48084	1.10723	1.06682	1.19357	1.18632	2.73973	0.666667	0.553097	1.40845	1.62242	0.852878	1.64918	1.37184	2.38394	1.53257	2.37781	1.26716	1.28205	1.48561	4.47059	13.1313	15.1515	12.963	13.5417	15.3846	8.49057	18.3673	12.5	10.0917	16.5049	7	11.5789
15.66	0.486381	0.387297	0.995644	0.874453	0.685654	1.34387	1.6139	2.31317	2.02643	1.94704	2.33463	1.5748	1.12782	1.03093	1.35135	2.31481	0.960828	2.09059	0.4662	1.12296	0.830306	1.04676	2.46575	0.769231	1.05088	1.34443	1.25369	0.586354	1.57421	2.02166	1.63112	1.53257	0.924703	1.79514	1.49573	1.67131	4	17.1717	6.06061	10.1852	6.25	15.3846	13.2075	11.2245	12.5	8.25688	14.5631	12	12.6316
15.68	0.826848	0.580945	0.995644	0.936914	0.580169	0.790514	0.806952	1.60142	1.93833	1.01246	1.75097	1.27953	1.4411	2.14777	1.57658	1.85185	0.739098	1.74216	0.582751	0.449186	0.8822	1.46546	2.46575	0.923077	0.663717	1.15237	1.62242	1.1194	0.974513	1.94946	2.38394	1.81992	1.98151	1.58395	2.13675	1.29991	2.82353	12.1212	12.1212	12.037	12.5	13.4615	13.2075	15.3061	5.76923	15.5963	5.82524	13	11.5789
15.7	0.729572	0.309837	1.30678	1.06184	1.16034	1.50198	0.931099	2.4911	1.5859	1.63551	2.62646	1.37795	1.4411	1.28866	1.35135	1.38889	1.10865	1.21951	1.04895	0.898372	0.467047	1.60502	3.08219	1.4359	0.829646	1.08835	1.69617	1.01279	1.49925	1.22744	1.38018	1.81992	1.5852	1.90074	1.60256	1.20706	3.05882	11.1111	13.1313	15.7407	16.6667	11.5385	14.1509	10.2041	11.5385	6.42202	9.70874	7	9.47368
15.72	0.826848	0.619675	0.808961	0.687071	0.791139	1.18577	0.869025	1.77936	2.20264	2.02492	1.6537	0.688976	1.12782	2.06186	1.68919	2.31481	1.4782	2.00348	1.22378	0.95452	0.674624	0.976971	2.60274	0.871795	0.553097	0.896287	1.25369	0.959488	1.1994	1.58845	3.51317	1.72414	1.84941	1.58395	1.7094	1.57846	2.82353	9.09091	10.101	11.1111	17.7083	7.69231	16.0377	12.2449	12.5	7.33945	14.5631	12	13.6842
15.74	0.972763	0.580945	0.746733	0.874453	0.896624	1.18577	1.05525	1.86833	1.93833	1.94704	1.94553	1.9685	1.81704	1.37457	2.13964	1.85185	1.77384	2.09059	0.932401	0.449186	1.19357	1.46546	2.67123	1.23077	0.331858	1.08835	1.03245	1.1194	1.7991	1.80505	2.76035	0.670498	2.11361	1.47835	1.17521	2.41411	3.52941	12.1212	19.1919	12.963	17.7083	5.76923	4.71698	12.2449	9.61538	12.844	4.85437	13	11.5789
15.76	1.21595	0.658404	0.871189	1.56152	0.580169	1.50198	1.24146	2.58007	2.29075	1.47975	1.55642	1.37795	1.25313	1.54639	1.68919	2.62346	0.665188	1.48084	0.699301	1.01067	0.985989	1.25611	2.60274	1.4359	0.829646	1.15237	1.40118	1.17271	1.87406	1.37184	2.25847	1.72414	1.98151	1.68955	1.60256	1.39276	4.23529	21.2121	13.1313	11.1111	17.7083	9.61538	12.2642	9.18367	13.4615	10.0917	11.6505	10	11.5789
15.78	0.632296	0.619675	0.933416	1.18676	1.05485	1.02767	1.30354	1.86833	1.05727	0.934579	1.94553	1.67323	1.25313	0.859107	1.91441	1.85185	1.33038	1.39373	0.815851	0.898372	0.830306	1.46546	3.0137	1.02564	0.829646	1.15237	0.958702	1.59915	1.04948	1.01083	2.25847	1.24521	2.24571	1.37276	1.81624	1.85701	3.05882	18.1818	18.1818	12.037	9.375	9.61538	7.54717	4.08163	4.80769	15.5963	10.6796	13	13.6842
15.8	0.972763	0.580945	0.871189	1.06184	0.791139	0.869565	0.993172	1.77936	2.46696	1.7134	2.0428	1.27953	1.56642	1.89003	1.12613	1.85185	0.443459	2.26481	0.641026	1.12296	0.778412	1.32589	3.15068	1.33333	0.442478	0.768246	1.03245	1.1194	1.1994	1.15523	2.50941	1.53257	2.24571	1.90074	1.60256	1.39276	3.52941	7.07071	8.08081	10.1852	16.6667	11.5385	10.3774	11.2245	10.5769	9.17431	11.6505	14	11.5789
15.82	0.437743	0.697134	1.1201	1.37414	0.632911	1.02767	0.806952	2.04626	1.40969	1.94704	0.972763	1.77165	1.37845	1.89003	2.13964	2.31481	1.03474	1.56794	0.582751	0.95452	1.03788	0.76762	1.9863	1.02564	0.719027	0.960307	1.40118	1.27932	1.42429	1.44404	1.00376	1.05364	1.5852	1.47835	1.60256	1.76416	4	19.1919	12.1212	7.40741	12.5	13.4615	7.54717	10.2041	10.5769	14.6789	6.79612	8	10.5263
15.84	0.632296	0.735864	1.05787	0.999375	0.527426	1.73913	1.24146	2.84698	1.23348	1.32399	1.6537	1.27953	0.56391	1.80412	2.81532	1.38889	1.03474	2.09059	1.28205	0.673779	0.830306	1.60502	2.73973	0.666667	0.553097	0.896287	1.25369	1.17271	1.49925	1.44404	1.25471	1.14943	1.0568	2.32313	1.92308	0.835655	3.52941	10.101	14.1414	5.55556	16.6667	15.3846	15.0943	9.18367	7.69231	14.6789	10.6796	15	10.5263
15.86	0.340467	0.890782	0.933416	0.811993	1.10759	1.34387	0.620732	2.2242	2.11454	1.32399	1.16732	1.47638	1.4411	2.06186	1.46396	2.46914	1.33038	1.48084	1.04895	0.95452	0.830306	0.907188	2.87671	1.23077	0.553097	1.08835	1.03245	1.33262	1.1994	1.58845	1.38018	1.43678	2.64201	0.844773	1.81624	1.94986	2.82353	13.1313	7.07071	11.1111	11.4583	11.5385	10.3774	8.16327	17.3077	16.5138	10.6796	9	9.47368
15.88	0.632296	0.542215	0.808961	0.562149	0.632911	1.58103	1.24146	1.24555	1.76211	2.02492	0.972763	0.984252	1.4411	1.20275	1.8018	1.08025	1.33038	1.74216	0.815851	0.786075	0.830306	0.628053	2.39726	1.17949	0.663717	1.21639	1.10619	1.17271	1.1994	1.80505	2.00753	1.05364	2.11361	1.26716	2.24359	1.48561	2.58824	13.1313	16.1616	12.963	13.5417	10.5769	10.3774	13.2653	11.5385	3.66972	9.70874	14	23.1579
15.9	0.77821	0.813323	0.808961	0.562149	0.685654	1.34387	1.05525	1.24555	1.5859	1.24611	2.0428	1.5748	1.19048	2.06186	1.57658	2.9321	0.739098	1.1324	1.10723	0.95452	1.03788	1.67481	3.28767	1.33333	0.884956	0.640205	1.03245	1.0661	1.04948	1.80505	1.63112	2.10728	1.5852	1.26716	0.961538	1.57846	4.47059	10.101	16.1616	8.33333	9.375	7.69231	8.49057	16.3265	12.5	6.42202	12.6214	12	13.6842
15.92	0.77821	0.580945	1.1201	1.06184	0.527426	0.948617	1.24146	1.69039	2.20264	1.24611	1.55642	1.87008	1.12782	1.46048	1.35135	3.7037	0.443459	1.56794	0.582751	1.01067	0.830306	1.04676	2.60274	1.02564	0.719027	0.960307	1.69617	1.0661	1.57421	1.29964	2.25847	1.91571	1.5852	1.58395	1.28205	1.11421	3.52941	12.1212	17.1717	12.037	11.4583	19.2308	9.43396	14.2857	12.5	8.25688	12.6214	14	7.36842
15.94	0.924125	0.619675	0.995644	1.18676	0.896624	0.869565	1.17939	2.40214	1.32159	2.49221	1.36187	1.27953	1.69173	1.6323	1.57658	2.31481	1.99557	2.00348	1.1655	0.786075	1.03788	0.837404	1.64384	1.33333	0.719027	1.47247	1.10619	0.799574	1.64918	1.29964	1.38018	1.53257	1.4531	1.90074	1.7094	1.29991	4	18.1818	15.1515	11.1111	17.7083	10.5769	6.60377	5.10204	10.5769	8.25688	9.70874	9	9.47368
15.96	0.583658	0.387297	0.622278	0.749532	0.949367	0.869565	1.24146	1.9573	2.46696	1.47975	2.14008	1.47638	1.19048	1.46048	0.900901	2.16049	1.40429	1.30662	1.1655	0.449186	0.934094	1.32589	3.21918	0.820513	0.829646	1.40845	1.10619	1.17271	1.64918	1.58845	2.38394	1.81992	1.98151	1.37276	1.17521	0.835655	2.11765	11.1111	19.1919	12.037	14.5833	7.69231	16.0377	13.2653	14.4231	11.0092	10.6796	10	17.8947
15.98	0.77821	0.426026	0.871189	1.06184	0.843882	1.18577	1.30354	1.51246	1.32159	2.1028	0.77821	1.77165	1.37845	1.54639	2.59009	1.85185	1.25647	1.91638	0.990676	0.505334	0.467047	1.53524	2.46575	1.12821	0.608407	1.21639	2.0649	0.906183	0.974513	1.58845	1.63112	2.58621	1.71731	1.47835	1.7094	1.67131	3.76471	12.1212	13.1313	13.8889	18.75	10.5769	16.0377	11.2245	17.3077	2.75229	14.5631	8	16.8421
16	0.583658	0.503486	0.808961	1.06184	1.37131	1.10672	0.931099	1.51246	1.4978	1.94704	2.43191	0.590551	1.4411	2.06186	2.7027	2.00617	0.739098	2.00348	1.3986	1.06682	0.778412	1.46546	2.53425	1.17949	0.387168	1.15237	1.25369	0.906183	1.12444	0.649819	2.88582	1.43678	1.0568	1.58395	2.13675	1.29991	2.35294	5.05051	17.1717	5.55556	13.5417	7.69231	4.71698	15.3061	10.5769	10.0917	10.6796	16	6.31579
16.02	1.11868	0.852053	0.871189	0.749532	0.791139	1.66008	1.11732	1.77936	1.93833	1.63551	0.875486	1.47638	1.06516	2.14777	1.46396	1.69753	1.10865	0.87108	0.874126	0.898372	0.8822	1.32589	2.05479	1.17949	0.553097	1.15237	1.62242	0.959488	1.57421	2.52708	2.38394	1.81992	1.0568	1.47835	1.92308	0.928505	4.47059	15.1515	16.1616	11.1111	16.6667	10.5769	12.2642	5.10204	15.3846	15.5963	8.73786	12	10.5263
16.04	0.875486	0.503486	0.56005	0.874453	0.738397	1.50198	0.869025	2.13523	1.93833	1.86916	2.0428	1.27953	1.37845	1.89003	1.46396	2.00617	0.813008	1.82927	0.641026	0.786075	1.08978	1.39567	2.73973	1.12821	0.719027	0.896287	1.03245	0.799574	1.57421	1.22744	2.25847	2.10728	3.30251	1.47835	2.5641	2.04271	3.05882	11.1111	10.101	9.25926	11.4583	8.65385	10.3774	7.14286	8.65385	10.0917	6.79612	10	10.5263
16.06	0.826848	0.503486	0.871189	0.874453	0.421941	1.10672	0.744879	1.15658	1.67401	2.18069	1.94553	1.87008	1.06516	1.03093	2.13964	2.9321	1.18256	1.91638	0.699301	0.95452	0.934094	1.11654	3.08219	0.717949	0.387168	1.02433	1.47493	0.746269	2.09895	2.38267	1.75659	1.72414	1.71731	1.05597	2.24359	1.94986	3.29412	10.101	14.1414	10.1852	14.5833	13.4615	13.2075	7.14286	17.3077	5.50459	8.73786	10	15.7895
16.08	0.632296	0.697134	0.746733	1.18676	0.791139	1.18577	1.42768	2.13523	1.76211	0.934579	1.36187	1.77165	1.4411	1.6323	1.68919	3.24074	1.55211	1.74216	0.815851	1.12296	0.62273	1.32589	2.19178	0.769231	0.663717	1.53649	1.17994	0.906183	1.49925	0.866426	1.88206	0.957854	1.84941	1.37276	1.17521	1.85701	2.82353	14.1414	10.101	6.48148	11.4583	9.61538	7.54717	14.2857	8.65385	11.0092	8.73786	12	8.42105
16.1	0.729572	0.464756	0.746733	1.24922	0.738397	1.50198	1.36561	1.86833	2.02643	2.64798	1.75097	1.5748	1.00251	1.46048	1.68919	2.46914	1.25647	2.09059	0.815851	1.01067	0.726518	1.39567	2.53425	0.974359	0.553097	1.21639	1.99115	0.959488	2.09895	0.866426	1.38018	1.62835	3.30251	1.26716	2.13675	1.67131	3.52941	14.1414	16.1616	15.7407	10.4167	11.5385	12.2642	12.2449	5.76923	11.0092	8.73786	9	7.36842
16.12	0.826848	0.735864	0.684505	1.18676	0.738397	1.18577	1.11732	1.69039	2.20264	2.1028	2.43191	2.26378	1.19048	2.23368	2.36486	2.77778	0.960828	1.56794	0.990676	0.617631	1.08978	1.39567	2.26027	1.17949	1.10619	1.15237	0.958702	1.17271	1.1994	1.87726	2.38394	2.39464	1.321	2.74551	1.81624	1.76416	3.76471	14.1414	15.1515	10.1852	13.5417	14.4231	8.49057	12.2449	15.3846	14.6789	10.6796	12	11.5789
16.14	1.07004	0.697134	0.808961	1.4366	0.685654	0.869565	1.55183	1.77936	2.11454	1.94704	1.94553	1.67323	1.12782	1.89003	1.23874	2.00617	1.10865	1.48084	0.990676	0.95452	1.40114	0.628053	2.46575	1.12821	1.10619	1.15237	1.40118	1.1194	0.974513	1.44404	1.88206	1.81992	2.37781	2.32313	2.67094	1.11421	3.05882	15.1515	13.1313	12.963	12.5	11.5385	9.43396	11.2245	10.5769	8.25688	10.6796	12	11.5789
16.16	0.632296	0.658404	0.746733	0.936914	0.896624	0.869565	1.30354	1.15658	1.85022	1.7134	2.0428	2.06693	1.19048	1.6323	1.8018	2.16049	0.960828	1.21951	0.874126	1.17911	0.830306	1.18632	3.21918	0.923077	0.884956	0.832266	1.03245	0.746269	1.57421	1.22744	2.50941	1.05364	1.5852	1.79514	1.17521	0.835655	2.82353	15.1515	12.1212	8.33333	12.5	7.69231	12.2642	11.2245	11.5385	6.42202	9.70874	13	16.8421
16.18	0.729572	0.426026	0.746733	1.37414	0.791139	1.10672	1.11732	1.9573	1.5859	1.55763	1.55642	1.47638	1.00251	1.54639	1.91441	3.08642	1.77384	1.56794	0.757576	1.06682	0.62273	0.837404	2.60274	0.820513	0.608407	1.28041	1.84366	1.0661	1.34933	1.80505	2.25847	1.14943	1.84941	1.47835	1.7094	1.20706	3.52941	8.08081	10.101	16.6667	9.375	18.2692	11.3208	14.2857	7.69231	8.25688	5.82524	9	11.5789
16.2	0.389105	0.735864	1.05787	0.562149	1.10759	1.58103	0.806952	2.13523	1.85022	1.32399	1.07004	2.16535	1.19048	2.14777	2.47748	2.00617	1.40429	1.91638	1.10723	1.01067	0.8822	0.76762	1.9863	1.02564	0.829646	0.640205	1.32743	0.799574	1.49925	1.37184	2.50941	2.01149	2.11361	1.58395	2.13675	0.928505	4.47059	11.1111	16.1616	12.037	25	13.4615	10.3774	9.18367	9.61538	9.17431	12.6214	9	16.8421
16.22	1.31323	0.464756	1.24456	1.31168	0.685654	1.66008	0.993172	1.69039	1.40969	1.01246	1.84825	1.08268	1.12782	1.28866	0.788288	1.54321	1.18256	1.65505	0.757576	0.729927	0.726518	1.74459	2.60274	0.769231	0.663717	0.960307	1.17994	0.852878	1.34933	1.37184	1.88206	1.62835	1.5852	1.79514	2.02991	2.04271	4.47059	11.1111	12.1212	11.1111	18.75	10.5769	9.43396	12.2449	13.4615	8.25688	9.70874	11	9.47368
16.24	0.583658	0.852053	0.995644	0.62461	1.10759	1.26482	1.24146	1.77936	1.5859	1.09034	1.84825	1.37795	0.877193	2.14777	2.13964	1.69753	0.813008	1.48084	0.932401	0.95452	0.778412	0.76762	1.84932	1.07692	0.774336	1.08835	1.54867	1.1194	1.42429	1.94946	3.26223	1.62835	1.84941	1.16156	2.45726	1.85701	2.82353	15.1515	4.0404	12.037	12.5	10.5769	13.2075	9.18367	2.88462	10.0917	12.6214	13	6.31579
16.26	0.972763	0.774593	0.497822	1.24922	0.685654	1.42292	1.55183	1.69039	1.5859	1.40187	2.23735	0.787402	1.31579	1.80412	1.35135	2.31481	1.25647	2.1777	1.10723	0.617631	0.778412	0.628053	2.94521	1.17949	0.719027	1.08835	1.25369	1.22601	1.49925	0.649819	2.38394	1.91571	1.98151	2.21753	1.38889	1.57846	4	6.06061	20.202	11.1111	12.5	6.73077	11.3208	10.2041	10.5769	15.5963	10.6796	8	11.5789
16.28	0.826848	0.658404	0.995644	0.936914	0.738397	0.948617	1.36561	1.51246	2.02643	1.79128	1.75097	1.1811	2.06767	1.28866	1.91441	2.00617	0.739098	1.65505	0.874126	0.729927	1.19357	1.32589	2.87671	0.769231	0.774336	1.53649	1.62242	1.01279	1.04948	1.01083	1.50565	1.81992	2.11361	1.16156	1.28205	1.02136	2.58824	14.1414	11.1111	14.8148	5.20833	11.5385	15.0943	16.3265	8.65385	12.844	13.5922	14	8.42105
16.3	1.16732	0.619675	0.684505	0.999375	0.896624	1.50198	1.42768	1.51246	2.64317	1.94704	1.6537	1.77165	1.50376	1.54639	2.25225	2.16049	1.18256	1.1324	0.990676	0.729927	0.985989	0.907188	2.19178	1.33333	1.05088	0.768246	1.47493	0.959488	1.42429	1.66065	2.50941	1.72414	1.321	1.16156	1.60256	1.29991	2.82353	20.202	19.1919	10.1852	17.7083	5.76923	16.0377	13.2653	6.73077	13.7615	4.85437	13	7.36842
16.32	0.924125	0.542215	0.684505	0.811993	0.791139	0.948617	1.11732	2.13523	1.40969	1.7134	2.82101	1.77165	1.12782	1.80412	2.81532	1.54321	1.77384	1.56794	1.51515	0.729927	0.8822	1.25611	2.39726	0.769231	0.608407	0.896287	1.40118	1.17271	2.02399	1.37184	2.25847	2.10728	2.50991	1.47835	2.24359	0.928505	4.23529	14.1414	13.1313	13.8889	12.5	11.5385	11.3208	19.3878	8.65385	10.0917	12.6214	8	9.47368
16.34	0.826848	0.464756	0.995644	1.37414	0.632911	1.10672	1.30354	2.4911	2.29075	2.02492	1.55642	1.27953	1.06516	1.46048	2.13964	3.24074	1.55211	1.91638	1.1655	0.842223	0.778412	1.53524	2.19178	0.974359	0.608407	1.34443	1.9174	1.01279	1.94903	1.94946	1.38018	2.87356	2.11361	1.79514	1.81624	1.20706	3.76471	13.1313	12.1212	11.1111	16.6667	10.5769	6.60377	12.2449	8.65385	5.50459	11.6505	13	13.6842
16.36	0.583658	0.580945	0.56005	1.37414	0.896624	1.58103	0.869025	2.58007	1.5859	1.09034	1.6537	1.37795	1.56642	1.97595	2.13964	2.77778	1.18256	1.91638	0.874126	0.95452	1.03788	1.32589	2.87671	1.02564	0.774336	0.896287	0.958702	1.17271	1.42429	1.15523	1.75659	1.72414	2.24571	2.63992	1.7094	1.48561	3.76471	12.1212	18.1818	9.25926	7.29167	9.61538	15.0943	20.4082	17.3077	11.9266	5.82524	15	11.5789
16.38	0.826848	0.580945	1.1201	1.1243	0.949367	1.97628	1.48976	1.33452	2.20264	1.94704	2.23735	1.47638	1.62907	2.23368	1.46396	2.16049	0.960828	2.09059	0.699301	0.95452	0.985989	1.53524	2.26027	1.28205	0.663717	1.40845	1.9174	1.27932	1.57421	1.29964	2.25847	2.20307	1.98151	1.68955	2.35043	0.835655	4	13.1313	9.09091	10.1852	12.5	4.80769	11.3208	13.2653	12.5	16.5138	11.6505	9	8.42105
16.4	1.0214	0.503486	0.871189	1.18676	1.00211	1.34387	0.869025	1.86833	1.76211	2.33645	2.0428	1.47638	1.00251	2.14777	2.13964	1.85185	1.03474	1.65505	1.04895	0.95452	0.467047	1.60502	2.53425	0.717949	0.884956	0.704225	0.884956	0.852878	1.1994	1.01083	2.00753	1.72414	2.37781	1.37276	1.60256	1.67131	3.05882	9.09091	17.1717	11.1111	11.4583	10.5769	16.9811	8.16327	7.69231	10.0917	6.79612	13	8.42105
16.42	0.583658	0.348567	0.622278	0.936914	1.05485	1.02767	1.67598	1.60142	2.29075	1.32399	2.0428	2.06693	1.25313	1.80412	2.47748	2.9321	1.55211	1.65505	0.990676	1.01067	1.19357	1.39567	3.35616	1.12821	0.663717	0.704225	1.40118	0.586354	2.32384	1.15523	2.50941	1.05364	2.90621	2.21753	1.49573	1.76416	4	11.1111	12.1212	12.037	15.625	14.4231	20.7547	9.18367	10.5769	11.9266	18.4466	11	10.5263
16.44	0.826848	0.658404	0.933416	0.936914	0.843882	1.10672	1.30354	1.9573	1.76211	1.55763	1.75097	1.37795	1.06516	1.37457	2.13964	1.38889	1.77384	1.56794	0.757576	0.729927	0.830306	1.32589	2.19178	0.666667	0.553097	0.576184	1.17994	1.0661	1.27436	1.58845	1.88206	1.62835	1.5852	1.16156	2.13675	1.39276	4.70588	10.101	8.08081	3.7037	15.625	14.4231	8.49057	10.2041	11.5385	15.5963	11.6505	13	9.47368
16.46	0.680934	0.619675	0.746733	1.06184	0.896624	1.18577	1.67598	1.51246	2.02643	1.24611	1.45914	1.27953	1.4411	1.80412	1.12613	2.62346	1.99557	1.74216	0.582751	0.898372	0.62273	1.11654	3.08219	1.02564	0.553097	0.960307	1.25369	0.906183	1.42429	1.44404	1.50565	1.43678	1.71731	1.37276	2.45726	1.67131	4.23529	11.1111	13.1313	12.963	13.5417	9.61538	9.43396	7.14286	12.5	12.844	2.91262	15	13.6842
16.48	0.680934	0.503486	0.684505	0.936914	0.843882	0.948617	1.8622	2.13523	1.67401	1.94704	2.14008	1.08268	1.31579	2.4055	1.57658	1.85185	1.40429	1.39373	1.1655	1.29141	0.674624	0.837404	2.67123	0.974359	0.995575	1.08835	1.9174	0.959488	1.87406	0.938628	1.88206	1.81992	2.24571	1.90074	1.60256	1.57846	4.47059	9.09091	11.1111	12.037	15.625	8.65385	6.60377	11.2245	11.5385	4.58716	4.85437	12	8.42105
16.5	0.535019	0.813323	0.746733	1.31168	0.632911	1.26482	1.11732	2.40214	1.67401	1.63551	2.0428	1.87008	1.31579	0.773196	1.35135	2.31481	0.886918	1.21951	1.22378	0.842223	0.934094	1.04676	2.46575	1.07692	0.663717	1.15237	1.69617	0.852878	1.04948	1.08303	2.00753	1.43678	1.4531	1.58395	1.81624	1.76416	3.76471	14.1414	14.1414	14.8148	10.4167	8.65385	10.3774	7.14286	9.61538	13.7615	10.6796	13	12.6316
16.52	0.875486	0.503486	1.1201	0.999375	0.685654	1.02767	1.6139	1.06762	1.85022	1.79128	1.6537	1.1811	1.4411	1.6323	1.91441	3.39506	1.03474	1.91638	0.874126	0.673779	1.14167	1.11654	3.21918	0.717949	0.553097	1.21639	1.03245	1.0661	1.72414	1.73285	1.12923	1.43678	2.11361	1.90074	1.49573	1.85701	3.29412	14.1414	11.1111	12.037	6.25	17.3077	7.54717	14.2857	11.5385	10.0917	4.85437	12	12.6316
16.54	0.486381	0.542215	0.871189	0.874453	0.632911	1.34387	1.67598	1.86833	1.76211	1.86916	1.45914	1.1811	1.8797	1.37457	1.46396	1.23457	1.33038	1.21951	0.932401	0.617631	0.934094	1.46546	2.67123	0.871795	0.608407	1.28041	1.69617	0.852878	1.42429	2.23827	1.88206	1.341	1.321	1.16156	2.13675	1.94986	2.35294	10.101	17.1717	16.6667	9.375	5.76923	6.60377	9.18367	7.69231	11.0092	6.79612	13	18.9474
16.56	0.632296	0.619675	0.995644	1.56152	0.474684	1.18577	1.67598	2.31317	1.93833	1.7134	1.07004	1.9685	1.19048	1.11684	2.25225	2.31481	0.886918	2.00348	0.641026	0.842223	0.8822	1.04676	3.15068	0.666667	0.497788	1.40845	1.47493	0.799574	1.12444	1.58845	1.75659	1.341	1.98151	1.05597	1.38889	1.67131	2.82353	13.1313	9.09091	11.1111	9.375	18.2692	9.43396	16.3265	15.3846	20.1835	7.76699	12	8.42105
16.58	0.632296	0.464756	1.1201	1.18676	0.949367	1.58103	1.67598	1.42349	2.11454	1.79128	2.0428	1.47638	1.25313	1.80412	1.68919	1.54321	1.25647	1.48084	0.582751	0.729927	1.34925	1.11654	1.91781	1.12821	1.27212	1.08835	1.40118	0.906183	1.49925	1.22744	0.878294	1.72414	1.98151	1.58395	1.28205	1.85701	3.05882	12.1212	8.08081	9.25926	14.5833	14.4231	10.3774	16.3265	11.5385	12.844	14.5631	11	13.6842
16.6	1.16732	0.503486	0.684505	0.811993	0.474684	0.948617	1.17939	1.51246	2.20264	1.63551	1.26459	1.37795	1.25313	1.6323	1.46396	1.08025	1.18256	1.65505	1.22378	0.95452	0.985989	1.11654	2.19178	0.923077	0.884956	0.832266	1.76991	0.692964	1.42429	1.29964	1.50565	0.957854	1.1889	1.79514	0.747863	1.39276	4.94118	12.1212	12.1212	4.62963	11.4583	10.5769	13.2075	12.2449	6.73077	17.4312	3.8835	11	11.5789
16.62	0.632296	0.387297	0.995644	0.749532	0.738397	1.10672	1.05525	2.31317	2.02643	1.79128	2.23735	0.787402	1.50376	1.37457	1.57658	2.00617	1.40429	1.91638	1.1655	0.95452	0.830306	0.697837	2.46575	1.33333	0.995575	1.02433	1.10619	1.27932	1.87406	1.80505	2.133	0.670498	2.50991	1.79514	1.60256	1.76416	3.76471	10.101	14.1414	9.25926	13.5417	12.5	11.3208	9.18367	14.4231	18.3486	11.6505	12	10.5263
16.64	0.535019	0.309837	0.871189	0.811993	0.791139	1.89723	1.36561	1.69039	1.67401	1.47975	1.94553	2.16535	1.8797	2.31959	1.23874	3.7037	1.62602	2.00348	0.932401	1.17911	0.934094	1.04676	2.12329	0.615385	0.940265	0.960307	1.54867	1.01279	1.57421	1.66065	2.133	1.81992	1.321	1.37276	1.49573	1.39276	1.88235	8.08081	10.101	12.963	9.375	20.1923	14.1509	10.2041	10.5769	14.6789	3.8835	11	12.6316
16.66	0.77821	0.619675	0.995644	1.31168	0.843882	1.81818	1.11732	1.60142	2.29075	2.02492	2.33463	1.37795	1.62907	1.71821	2.13964	2.00617	1.18256	1.48084	0.874126	0.786075	0.830306	1.32589	2.87671	0.871795	0.663717	1.47247	1.9174	1.22601	1.27436	0.866426	3.01129	0.957854	1.4531	1.79514	1.49573	1.20706	4.47059	10.101	6.06061	10.1852	16.6667	11.5385	13.2075	11.2245	9.61538	11.9266	9.70874	10	8.42105
16.68	0.924125	0.464756	0.933416	0.999375	0.896624	1.10672	1.24146	2.4911	1.5859	1.94704	0.680934	1.67323	1.75439	1.6323	1.91441	3.85802	1.55211	1.82927	0.932401	0.617631	0.8822	1.74459	2.60274	0.512821	0.829646	1.21639	1.69617	1.17271	1.57421	1.37184	2.25847	1.24521	1.84941	0.63358	1.81624	1.39276	4.23529	19.1919	25.2525	14.8148	8.33333	8.65385	11.3208	16.3265	11.5385	11.0092	14.5631	10	10.5263
16.7	0.924125	0.348567	0.995644	1.1243	1.00211	1.10672	1.30354	1.51246	2.99559	1.63551	1.75097	1.77165	1.25313	1.89003	1.8018	2.00617	1.55211	1.56794	0.874126	0.786075	0.985989	0.907188	2.80822	0.923077	0.553097	1.02433	0.884956	0.906183	1.49925	1.80505	2.50941	1.53257	1.5852	1.68955	2.02991	2.50696	3.76471	17.1717	11.1111	19.4444	17.7083	8.65385	7.54717	14.2857	8.65385	7.33945	7.76699	7	8.42105
16.72	0.389105	0.503486	0.746733	0.811993	0.791139	1.26482	1.05525	1.42349	1.4978	2.18069	1.94553	1.5748	0.93985	2.14777	1.57658	3.08642	1.33038	1.30662	0.874126	1.17911	0.518941	1.39567	2.32877	0.615385	0.497788	1.15237	1.69617	1.1194	1.1994	1.58845	2.133	1.14943	1.71731	1.79514	2.13675	1.29991	3.05882	13.1313	14.1414	14.8148	8.33333	9.61538	12.2642	17.3469	15.3846	6.42202	7.76699	14	17.8947
16.74	0.729572	0.348567	1.8046	0.874453	1.05485	1.34387	1.05525	1.86833	1.76211	1.55763	1.45914	1.5748	0.93985	1.71821	1.68919	2.77778	1.69993	0.958188	1.04895	1.12296	0.985989	1.18632	2.19178	1.07692	1.10619	0.512164	1.54867	0.746269	1.04948	1.37184	2.50941	1.72414	2.37781	1.68955	1.49573	1.39276	5.41176	14.1414	21.2121	6.48148	19.7917	10.5769	10.3774	8.16327	18.2692	11.9266	7.76699	12	16.8421
16.76	0.729572	0.890782	1.55569	1.1243	0.580169	1.18577	1.17939	1.86833	1.4978	1.79128	2.14008	1.5748	1.19048	1.37457	1.46396	2.62346	1.40429	1.74216	0.874126	0.786075	0.8822	1.04676	2.73973	1.02564	0.608407	1.21639	1.54867	0.799574	2.02399	1.51625	1.75659	1.53257	1.71731	0.844773	1.7094	1.20706	3.05882	7.07071	14.1414	12.037	13.5417	16.3462	11.3208	13.2653	10.5769	16.5138	12.6214	17	8.42105
16.78	0.826848	0.774593	1.1201	1.06184	0.896624	1.42292	1.42768	1.77936	1.5859	2.57009	2.82101	1.5748	1.81704	2.14777	1.91441	1.69753	0.886918	1.65505	0.874126	0.561482	1.03788	1.04676	3.0137	1.48718	1.10619	0.896287	1.25369	0.852878	1.1994	1.58845	1.88206	1.53257	1.0568	1.90074	1.28205	1.39276	3.29412	16.1616	8.08081	9.25926	13.5417	6.73077	13.2075	14.2857	11.5385	11.9266	9.70874	10	14.7368
16.8	0.972763	0.426026	0.871189	1.56152	0.580169	1.10672	1.80012	2.40214	2.37885	1.94704	1.84825	1.47638	1.62907	1.89003	2.25225	2.31481	1.33038	2.00348	1.10723	0.95452	1.24546	1.53524	1.91781	0.923077	0.553097	1.08835	2.0649	1.01279	1.34933	1.44404	1.88206	1.81992	1.0568	2.11193	0.961538	1.67131	3.76471	18.1818	16.1616	10.1852	8.33333	12.5	8.49057	11.2245	15.3846	12.844	8.73786	17	10.5263
16.82	0.632296	0.426026	0.622278	1.1243	0.685654	0.948617	0.744879	1.69039	2.29075	2.41433	1.55642	1.47638	1.56642	1.89003	2.25225	3.24074	1.18256	1.48084	0.815851	1.06682	1.29735	1.74459	2.60274	1.07692	1.05088	1.66453	1.47493	1.1194	1.64918	1.29964	2.00753	1.53257	1.71731	2.00634	1.06838	1.76416	3.76471	7.07071	7.07071	19.4444	14.5833	15.3846	9.43396	16.3265	5.76923	10.0917	10.6796	6	10.5263
16.84	0.77821	0.542215	0.746733	0.874453	0.527426	0.55336	1.30354	1.33452	2.73128	2.25857	1.6537	1.1811	2.00501	1.28866	1.01351	2.46914	1.18256	1.39373	0.815851	1.01067	0.570835	1.18632	3.15068	0.923077	1.05088	1.85659	1.69617	1.22601	1.1994	1.37184	1.00376	1.62835	1.4531	1.47835	1.28205	1.67131	4.70588	13.1313	5.05051	15.7407	15.625	13.4615	13.2075	14.2857	9.61538	9.17431	15.534	12	17.8947
16.86	0.680934	0.619675	0.995644	1.4366	0.738397	1.10672	0.558659	1.9573	2.20264	1.55763	1.84825	1.27953	1.06516	1.97595	1.57658	2.62346	2.06948	1.82927	0.874126	0.95452	0.674624	1.18632	2.26027	1.48718	0.829646	0.960307	1.25369	0.906183	1.12444	1.44404	1.75659	1.05364	1.5852	1.26716	1.7094	1.76416	3.29412	14.1414	10.101	9.25926	12.5	13.4615	15.0943	15.3061	8.65385	15.5963	11.6505	8	22.1053
16.88	0.972763	0.464756	1.30678	1.06184	0.896624	1.58103	1.24146	1.77936	1.23348	1.7134	1.45914	1.37795	2.00501	1.80412	2.47748	1.38889	1.03474	1.1324	0.757576	1.01067	1.08978	0.976971	3.21918	1.17949	0.608407	1.15237	1.25369	1.01279	1.04948	1.51625	1.38018	1.43678	1.98151	1.37276	2.24359	1.85701	6.35294	20.202	12.1212	7.40741	18.75	8.65385	10.3774	11.2245	9.61538	9.17431	8.73786	14	9.47368
16.9	0.680934	0.580945	0.871189	0.374766	0.949367	0.711462	0.931099	1.69039	1.67401	1.47975	2.43191	1.27953	1.50376	1.46048	1.23874	0.771605	0.886918	1.91638	0.990676	1.06682	0.830306	0.907188	2.32877	1.4359	0.608407	0.960307	1.25369	0.799574	1.1994	1.15523	2.50941	1.43678	2.24571	2.32313	1.81624	1.29991	3.29412	8.08081	12.1212	12.037	12.5	11.5385	12.2642	15.3061	6.73077	13.7615	7.76699	11	15.7895
16.92	0.924125	0.464756	0.995644	0.811993	0.896624	1.42292	1.30354	1.69039	1.4978	1.32399	2.14008	1.1811	0.93985	1.54639	1.01351	1.54321	1.18256	1.30662	1.3986	1.01067	1.08978	1.67481	2.53425	0.923077	0.663717	0.832266	0.958702	0.799574	1.87406	2.02166	2.38394	1.91571	1.5852	1.26716	1.28205	1.20706	2.58824	14.1414	13.1313	11.1111	18.75	12.5	17.9245	14.2857	11.5385	11.0092	19.4175	11	10.5263
16.94	0.535019	0.735864	0.871189	1.06184	0.738397	1.10672	1.30354	1.86833	1.76211	1.79128	1.55642	1.67323	1.19048	2.06186	1.57658	2.46914	1.25647	1.21951	1.28205	0.729927	0.726518	1.18632	2.46575	1.23077	0.663717	1.47247	1.62242	0.852878	1.34933	1.29964	2.133	1.53257	1.98151	1.90074	2.35043	2.69266	3.76471	17.1717	19.1919	13.8889	11.4583	11.5385	9.43396	7.14286	11.5385	8.25688	17.4757	10	14.7368
16.96	0.680934	0.580945	1.43124	0.999375	1.42405	1.42292	1.30354	1.86833	2.11454	1.55763	1.84825	1.87008	1.19048	0.945017	1.68919	2.77778	1.4782	1.82927	1.04895	1.06682	0.985989	1.18632	2.19178	0.717949	0.663717	1.21639	1.17994	0.852878	1.7991	1.22744	2.76035	1.24521	1.5852	1.37276	1.7094	1.67131	5.17647	18.1818	10.101	9.25926	11.4583	13.4615	11.3208	12.2449	9.61538	11.0092	15.534	6	15.7895
16.98	0.486381	0.426026	1.30678	1.06184	0.791139	1.26482	1.17939	1.51246	1.93833	2.25857	1.84825	1.9685	1.81704	1.6323	1.46396	1.85185	1.4782	1.65505	0.407925	0.673779	0.62273	1.53524	2.46575	1.17949	0.884956	1.28041	1.17994	0.959488	2.02399	1.22744	1.88206	1.341	1.71731	2.63992	1.81624	1.94986	4	8.08081	16.1616	9.25926	9.375	10.5769	10.3774	12.2449	17.3077	9.17431	12.6214	8	11.5789
17	0.680934	0.580945	0.684505	0.687071	0.791139	0.948617	0.993172	2.75801	2.20264	2.64798	2.62646	2.16535	1.06516	2.31959	1.91441	1.54321	1.10865	1.39373	0.990676	0.842223	0.934094	1.39567	2.46575	0.923077	1.1615	0.896287	1.32743	0.746269	1.7991	2.02166	2.88582	1.14943	1.71731	1.90074	0.961538	1.76416	4.70588	22.2222	20.202	12.963	14.5833	11.5385	14.1509	13.2653	11.5385	14.6789	15.534	13	10.5263
17.02	1.0214	0.580945	0.995644	1.18676	0.896624	1.26482	0.993172	1.33452	2.20264	2.18069	3.01556	1.1811	0.814536	2.31959	2.47748	1.85185	0.886918	1.56794	0.757576	0.729927	0.778412	1.39567	2.87671	1.02564	0.608407	0.960307	1.03245	0.852878	1.72414	1.66065	1.75659	2.29885	2.77411	1.37276	1.60256	1.48561	2.35294	16.1616	10.101	12.963	7.29167	7.69231	7.54717	13.2653	15.3846	11.9266	11.6505	14	8.42105
17.04	0.729572	0.774593	1.18233	1.24922	1.00211	1.18577	1.6139	1.42349	2.73128	1.86916	1.84825	1.37795	1.50376	2.23368	1.35135	2.62346	1.55211	1.82927	0.990676	1.01067	0.674624	1.95394	3.08219	1.12821	0.995575	0.704225	1.17994	1.27932	1.64918	1.94946	2.76035	1.81992	1.321	1.26716	2.13675	1.67131	3.52941	13.1313	23.2323	8.33333	19.7917	8.65385	13.2075	11.2245	15.3846	11.9266	11.6505	15	8.42105
17.06	0.680934	0.580945	1.18233	1.06184	0.474684	1.34387	1.36561	1.51246	1.67401	2.1028	2.14008	2.75591	1.31579	1.6323	1.91441	2.9321	1.40429	1.82927	1.10723	1.01067	0.934094	1.25611	2.80822	1.28205	0.940265	1.15237	1.10619	1.22601	1.1994	0.866426	1.50565	2.39464	1.321	2.53432	1.49573	1.67131	4.70588	4.0404	9.09091	13.8889	9.375	6.73077	7.54717	17.3469	10.5769	8.25688	12.6214	5	12.6316
17.08	0.972763	0.852053	0.746733	1.1243	0.527426	0.632411	1.48976	2.40214	1.40969	1.55763	1.55642	1.9685	1.06516	2.06186	2.47748	2.46914	1.99557	1.65505	0.757576	1.01067	0.778412	1.11654	2.46575	1.33333	0.553097	1.02433	1.25369	1.22601	1.49925	2.16606	1.63112	2.29885	2.24571	1.68955	2.24359	2.04271	4.23529	12.1212	14.1414	14.8148	16.6667	11.5385	11.3208	15.3061	10.5769	7.33945	12.6214	13	12.6316
17.1	0.875486	0.348567	1.55569	0.437227	0.843882	1.42292	1.48976	0.800712	1.93833	1.55763	1.16732	1.27953	1.69173	1.97595	1.57658	2.77778	1.03474	2.52613	1.10723	1.01067	0.8822	1.32589	2.73973	1.4359	0.553097	1.92061	1.25369	1.33262	1.72414	1.44404	3.01129	2.01149	1.98151	1.90074	1.7094	1.76416	6.35294	6.06061	17.1717	9.25926	13.5417	20.1923	7.54717	9.18367	18.2692	6.42202	10.6796	13	12.6316
17.12	1.21595	0.426026	1.05787	1.24922	0.791139	1.02767	0.931099	2.2242	1.32159	2.64798	1.84825	1.5748	1.12782	1.28866	1.35135	2.77778	0.813008	2.35192	1.57343	0.95452	0.778412	1.04676	2.60274	0.871795	0.608407	1.08835	1.40118	0.852878	1.64918	1.22744	1.38018	1.53257	1.98151	2.11193	2.13675	2.22841	3.52941	14.1414	13.1313	12.963	17.7083	12.5	13.2075	13.2653	10.5769	10.0917	6.79612	7	13.6842
17.14	0.924125	0.503486	0.808961	0.999375	1.00211	1.18577	0.869025	1.60142	2.29075	1.94704	2.0428	1.67323	1.50376	1.71821	1.68919	2.46914	1.33038	1.56794	1.04895	1.40371	1.14167	1.25611	3.49315	0.974359	0.884956	1.02433	1.40118	0.959488	1.57421	1.94946	1.50565	2.10728	2.24571	1.90074	2.13675	1.29991	3.76471	12.1212	9.09091	16.6667	13.5417	12.5	16.0377	12.2449	7.69231	19.2661	15.534	11	13.6842
17.16	0.924125	0.542215	0.684505	1.24922	0.527426	1.34387	1.24146	1.42349	1.5859	1.7134	1.94553	1.5748	1.19048	1.80412	1.46396	3.08642	1.25647	2.00348	0.990676	1.12296	1.08978	1.39567	3.0137	0.923077	0.774336	1.15237	1.76991	1.0661	1.1994	2.16606	2.50941	2.29885	1.4531	2.11193	2.5641	1.11421	4	4.0404	17.1717	7.40741	17.7083	8.65385	9.43396	15.3061	5.76923	9.17431	12.6214	15	9.47368
17.18	0.77821	0.426026	1.1201	1.49906	1.37131	1.97628	1.55183	2.13523	1.76211	2.41433	1.75097	0.688976	1.56642	2.14777	1.46396	3.24074	0.960828	1.30662	0.990676	1.45985	0.778412	0.907188	2.60274	0.769231	0.774336	1.79257	0.811209	0.852878	1.34933	1.37184	3.01129	2.10728	2.11361	2.32313	2.5641	2.41411	3.76471	11.1111	10.101	12.963	13.5417	8.65385	13.2075	16.3265	10.5769	18.3486	12.6214	14	14.7368
17.2	0.875486	0.697134	0.746733	0.874453	0.632911	1.10672	1.17939	2.40214	2.46696	2.1028	1.6537	1.37795	1.37845	2.23368	2.25225	2.62346	1.84775	1.56794	1.04895	1.17911	0.62273	1.74459	2.60274	0.615385	0.774336	1.34443	1.62242	0.852878	1.34933	0.938628	1.63112	2.68199	1.1889	2.21753	2.88462	1.48561	3.76471	15.1515	17.1717	16.6667	13.5417	13.4615	9.43396	24.4898	17.3077	7.33945	14.5631	13	12.6316
17.22	1.11868	0.619675	0.56005	1.18676	0.843882	1.26482	1.24146	2.2242	1.76211	2.64798	1.94553	1.9685	1.25313	1.28866	2.13964	2.9321	1.40429	1.82927	0.932401	0.95452	1.08978	1.18632	2.73973	0.820513	0.331858	0.896287	1.03245	0.639659	1.57421	1.66065	2.76035	1.72414	1.98151	1.79514	2.02991	1.57846	5.64706	15.1515	17.1717	12.963	12.5	13.4615	10.3774	21.4286	11.5385	11.9266	12.6214	13	16.8421
17.24	0.875486	0.580945	1.36901	0.811993	0.738397	1.42292	1.8622	1.51246	1.93833	1.86916	2.23735	1.5748	1.50376	2.06186	1.8018	1.69753	1.4782	1.48084	0.932401	0.898372	0.8822	1.39567	2.80822	1.33333	0.719027	1.08835	1.54867	1.0661	1.1994	2.31047	2.25847	2.01149	1.84941	2.63992	2.24359	1.67131	4.23529	18.1818	19.1919	19.4444	16.6667	16.3462	15.0943	19.3878	8.65385	14.6789	13.5922	15	14.7368
17.26	0.875486	0.542215	0.933416	0.999375	0.896624	1.89723	1.30354	1.60142	1.40969	1.86916	1.26459	2.3622	1.69173	1.80412	2.13964	2.77778	1.69993	1.74216	1.10723	0.729927	1.03788	1.53524	2.19178	1.4359	0.774336	1.28041	1.76991	0.799574	1.42429	1.29964	1.63112	2.29885	2.37781	2.74551	2.99145	1.02136	4.94118	14.1414	20.202	15.7407	17.7083	12.5	17.9245	22.449	13.4615	15.5963	10.6796	12	13.6842
17.28	0.77821	0.813323	0.808961	0.936914	0.896624	1.18577	1.80012	1.51246	2.02643	1.86916	2.0428	2.06693	1.50376	1.89003	2.02703	2.31481	1.25647	1.82927	1.04895	1.17911	0.830306	1.32589	2.73973	0.974359	0.608407	1.40845	1.54867	1.0661	1.72414	1.66065	1.63112	1.81992	2.37781	2.21753	2.99145	2.22841	5.88235	10.101	12.1212	15.7407	11.4583	13.4615	7.54717	18.3673	12.5	11.9266	10.6796	17	23.1579
17.3	0.875486	0.697134	0.933416	1.06184	1.16034	1.34387	1.73805	1.86833	1.67401	2.02492	1.26459	1.5748	1.75439	2.14777	2.02703	2.31481	1.62602	1.74216	0.932401	0.898372	0.778412	1.46546	3.49315	1.02564	0.884956	0.896287	2.0649	0.906183	2.09895	1.73285	2.50941	1.53257	1.4531	2.85111	2.88462	2.32126	3.76471	10.101	18.1818	11.1111	11.4583	14.4231	11.3208	21.4286	18.2692	8.25688	14.5631	13	18.9474
17.32	1.07004	0.387297	1.05787	0.811993	0.949367	1.42292	1.36561	2.58007	1.85022	2.18069	2.14008	1.47638	1.19048	1.54639	1.68919	2.31481	1.55211	1.0453	0.582751	1.29141	0.934094	1.25611	2.80822	0.769231	0.884956	1.08835	1.84366	1.38593	2.24888	2.02166	2.133	1.53257	2.50991	1.90074	2.35043	1.76416	4.47059	17.1717	12.1212	11.1111	14.5833	13.4615	9.43396	29.5918	17.3077	14.6789	7.76699	17	23.1579
17.34	1.0214	0.464756	1.05787	0.811993	1.05485	1.50198	1.24146	1.51246	2.73128	2.49221	2.82101	2.06693	1.19048	1.71821	1.91441	3.54938	1.18256	1.91638	0.641026	0.617631	1.14167	1.81438	2.46575	1.12821	0.829646	1.28041	1.54867	1.33262	2.02399	1.94946	2.00753	1.53257	1.321	2.00634	2.45726	2.41411	5.88235	11.1111	13.1313	17.5926	9.375	17.3077	8.49057	31.6327	9.61538	11.0092	14.5631	13	21.0526
17.36	0.972763	0.426026	0.808961	0.562149	0.896624	1.50198	1.55183	1.69039	2.29075	2.49221	1.94553	1.08268	2.00501	1.54639	2.13964	2.00617	1.40429	2.1777	1.10723	1.34756	0.985989	1.46546	2.87671	1.07692	0.663717	1.21639	2.0649	1.17271	1.34933	1.44404	2.25847	1.81992	1.98151	2.85111	1.92308	1.67131	4.23529	22.2222	18.1818	12.963	14.5833	12.5	16.0377	25.5102	14.4231	13.7615	9.70874	14	13.6842
17.38	0.972763	0.426026	1.05787	1.74891	0.580169	1.73913	1.17939	2.31317	1.93833	1.55763	2.23735	1.77165	1.75439	1.37457	1.91441	3.85802	1.10865	1.74216	0.815851	1.06682	1.24546	1.46546	2.12329	0.769231	0.608407	1.08835	1.54867	1.01279	1.7991	1.15523	2.50941	1.24521	2.11361	2.95671	1.60256	1.85701	4.23529	12.1212	14.1414	13.8889	16.6667	14.4231	14.1509	21.4286	16.3462	10.0917	9.70874	11	31.5789
17.4	0.729572	0.774593	0.933416	1.56152	0.369198	2.05534	0.993172	2.40214	2.55507	1.94704	2.23735	2.26378	1.4411	1.80412	1.46396	2.31481	1.55211	1.74216	1.1655	0.393038	1.08978	0.837404	2.46575	0.974359	1.27212	1.02433	1.17994	1.01279	1.72414	1.51625	2.133	1.81992	2.11361	2.11193	1.49573	0.928505	5.64706	11.1111	13.1313	15.7407	17.7083	15.3846	12.2642	23.4694	15.3846	14.6789	7.76699	19	21.0526
17.42	1.0214	1.20062	0.995644	1.1243	0.632911	1.18577	1.55183	1.60142	3.43612	1.86916	2.33463	1.77165	1.4411	2.57732	2.7027	1.23457	1.40429	1.91638	1.1655	0.729927	1.40114	1.46546	2.26027	1.17949	1.10619	1.34443	2.0649	1.17271	1.64918	1.73285	2.88582	1.24521	2.37781	2.21753	1.92308	1.02136	3.29412	20.202	14.1414	12.963	13.5417	12.5	16.9811	18.3673	16.3462	12.844	16.5049	16	14.7368
17.44	0.632296	0.697134	0.933416	1.24922	0.738397	1.18577	1.48976	2.2242	2.37885	1.94704	2.62646	1.77165	1.69173	2.57732	2.02703	2.62346	1.55211	2.09059	1.10723	1.01067	0.8822	1.39567	1.71233	0.769231	0.553097	0.768246	1.76991	1.1194	1.87406	1.44404	2.63488	2.10728	3.56671	2.11193	2.5641	2.59981	4	10.101	16.1616	14.8148	20.8333	16.3462	11.3208	20.4082	12.5	16.5138	15.534	10	12.6316
17.46	1.26459	0.697134	0.746733	0.936914	1.05485	1.97628	0.806952	1.60142	2.29075	2.02492	1.55642	2.55906	1.75439	1.80412	2.25225	3.39506	1.55211	1.21951	1.1655	0.617631	0.62273	1.18632	2.39726	1.33333	0.884956	1.47247	1.9174	1.1194	1.27436	1.37184	2.25847	1.62835	3.03831	1.37276	1.7094	2.04271	4.94118	14.1414	9.09091	18.5185	16.6667	14.4231	9.43396	19.3878	12.5	11.0092	15.534	14	8.42105
17.48	0.632296	0.580945	1.24456	0.999375	0.738397	1.18577	1.36561	1.9573	2.55507	1.7134	1.26459	1.1811	1.4411	1.54639	2.13964	2.16049	1.40429	1.91638	0.874126	1.12296	0.674624	1.60502	2.19178	1.07692	1.05088	1.08835	1.40118	1.38593	2.09895	2.38267	1.63112	1.91571	3.03831	2.32313	2.45726	1.67131	3.52941	17.1717	16.1616	15.7407	10.4167	9.61538	15.0943	13.2653	13.4615	11.9266	15.534	16	23.1579
17.5	0.535019	0.697134	1.05787	1.24922	0.738397	1.42292	0.931099	2.4911	1.85022	2.02492	1.55642	1.1811	1.4411	2.14777	1.57658	2.46914	1.10865	1.48084	1.34033	0.95452	0.674624	1.25611	2.87671	1.38462	0.719027	1.34443	1.25369	0.852878	2.09895	1.37184	1.25471	1.341	3.30251	1.26716	2.45726	1.76416	5.17647	8.08081	13.1313	12.963	16.6667	18.2692	6.60377	13.2653	20.1923	12.844	14.5631	19	8.42105
17.52	0.875486	0.697134	0.871189	1.06184	0.843882	1.89723	1.42768	2.40214	1.85022	2.1028	2.14008	1.9685	1.69173	1.89003	2.59009	2.31481	1.03474	1.0453	1.22378	0.842223	0.8822	1.53524	3.42466	1.89744	0.719027	1.66453	1.9174	0.906183	0.974513	1.22744	2.00753	1.24521	2.64201	1.58395	2.45726	2.32126	6.58824	12.1212	20.202	17.5926	18.75	13.4615	18.8679	16.3265	15.3846	10.0917	10.6796	15	12.6316
17.54	1.16732	0.735864	1.05787	1.49906	1.16034	1.58103	1.17939	1.9573	2.37885	1.94704	2.82101	1.5748	1.25313	1.97595	2.7027	3.24074	1.62602	2.00348	1.51515	1.01067	1.14167	1.53524	2.94521	1.33333	0.995575	1.15237	1.76991	1.27932	2.24888	1.94946	1.38018	2.49042	2.11361	2.21753	2.5641	1.67131	4.94118	11.1111	20.202	12.963	10.4167	22.1154	13.2075	13.2653	12.5	11.0092	12.6214	8	17.8947
17.56	0.77821	0.619675	1.30678	1.24922	1.16034	1.89723	1.67598	1.15658	2.37885	1.63551	2.14008	1.77165	1.25313	1.97595	3.26577	1.85185	1.99557	2.26481	1.28205	1.01067	0.830306	1.74459	2.94521	1.74359	0.884956	1.02433	1.76991	1.43923	1.27436	1.73285	2.00753	3.06513	1.71731	1.79514	2.45726	1.76416	5.64706	19.1919	17.1717	11.1111	13.5417	18.2692	14.1509	13.2653	22.1154	9.17431	9.70874	24	21.0526
17.58	0.875486	0.542215	1.05787	0.999375	1.21308	1.97628	1.05525	2.31317	3.0837	1.86916	2.0428	2.06693	1.81704	2.66323	2.92793	3.24074	1.77384	2.1777	0.582751	1.12296	1.40114	1.32589	3.28767	1.4359	0.719027	0.896287	1.69617	1.17271	2.24888	2.23827	2.76035	1.72414	2.90621	2.63992	2.77778	2.04271	6.11765	16.1616	16.1616	12.037	19.7917	15.3846	14.1509	15.3061	18.2692	11.0092	11.6505	10	18.9474
17.6	0.826848	0.890782	1.05787	1.1243	1.26582	1.18577	1.17939	2.31317	2.46696	2.64798	2.82101	1.27953	1.56642	1.89003	1.8018	2.16049	1.03474	2.43902	0.990676	1.17911	0.8822	1.95394	3.0137	1.07692	0.884956	1.21639	1.25369	1.38593	2.17391	1.73285	2.76035	2.39464	1.98151	1.47835	1.81624	1.29991	3.76471	9.09091	16.1616	14.8148	14.5833	13.4615	22.6415	19.3878	20.1923	17.4312	11.6505	13	16.8421
17.62	0.972763	0.580945	0.995644	1.4366	0.632911	1.66008	1.36561	1.60142	2.55507	2.64798	2.82101	1.27953	1.50376	1.97595	2.47748	1.69753	1.62602	1.91638	1.57343	1.06682	1.08978	1.18632	3.76712	1.38462	1.05088	1.28041	1.54867	1.0661	1.87406	2.38267	2.88582	1.81992	2.64201	1.79514	1.7094	2.87837	6.11765	15.1515	11.1111	17.5926	10.4167	17.3077	10.3774	18.3673	17.3077	15.5963	22.3301	14	14.7368
17.64	0.826848	0.774593	0.871189	0.999375	1.05485	1.73913	1.17939	2.2242	2.02643	1.55763	2.14008	1.9685	1.37845	2.4055	2.02703	2.46914	2.21729	2.09059	1.3986	0.95452	1.29735	1.67481	3.21918	1.07692	0.829646	1.21639	2.13864	0.959488	2.62369	1.94946	3.26223	1.43678	1.4531	2.21753	1.92308	1.57846	7.76471	19.1919	20.202	12.963	6.25	11.5385	10.3774	20.4082	17.3077	11.0092	15.534	10	12.6316
17.66	0.972763	0.968242	1.30678	1.62399	0.896624	1.73913	2.11049	2.13523	2.55507	2.49221	3.30739	1.67323	2.06767	2.06186	1.68919	2.9321	1.92166	2.09059	0.932401	1.12296	0.62273	1.53524	3.0137	0.923077	1.05088	1.28041	1.84366	0.692964	2.3988	1.44404	2.133	2.58621	3.03831	1.68955	2.35043	2.04271	3.29412	13.1313	18.1818	9.25926	10.4167	6.73077	11.3208	16.3265	11.5385	16.5138	9.70874	18	14.7368
17.68	1.16732	0.580945	1.05787	1.06184	0.685654	1.42292	1.80012	2.58007	2.55507	2.25857	2.72374	2.3622	2.00501	2.83505	2.47748	2.31481	1.62602	1.39373	1.10723	1.29141	0.8822	1.67481	3.21918	0.974359	1.21681	1.47247	1.62242	1.0661	1.87406	2.23827	3.3877	2.20307	2.50991	2.63992	2.13675	2.22841	3.52941	13.1313	16.1616	17.5926	15.625	16.3462	16.0377	21.4286	6.73077	15.5963	14.5631	15	17.8947
17.7	1.0214	0.968242	1.36901	1.06184	0.896624	2.05534	1.30354	2.58007	1.76211	2.18069	1.94553	1.9685	1.56642	2.49141	2.47748	3.24074	1.84775	2.00348	0.874126	1.23526	1.03788	1.60502	1.91781	1.64103	1.27212	0.960307	1.25369	1.22601	2.02399	1.73285	3.01129	1.62835	3.17041	1.58395	2.67094	2.04271	3.76471	18.1818	13.1313	11.1111	11.4583	13.4615	21.6981	23.4694	16.3462	11.9266	11.6505	15	27.3684
17.72	0.680934	0.813323	1.43124	1.49906	1.00211	1.42292	2.11049	1.86833	1.67401	2.33645	2.62646	1.5748	1.75439	2.14777	1.35135	1.69753	1.25647	1.1324	1.68998	1.29141	0.934094	1.25611	3.42466	1.23077	0.663717	1.34443	1.69617	0.906183	2.54873	2.02166	1.75659	1.14943	1.98151	1.79514	1.92308	1.76416	5.41176	14.1414	17.1717	5.55556	16.6667	13.4615	10.3774	22.449	14.4231	21.1009	15.534	21	9.47368
17.74	1.11868	0.852053	1.49347	1.06184	0.949367	0.948617	1.80012	2.2242	2.99559	2.41433	1.6537	2.16535	1.50376	1.71821	1.46396	2.31481	1.33038	1.82927	1.10723	1.12296	1.08978	1.88416	2.67123	1.58974	0.940265	1.53649	1.47493	0.852878	1.94903	2.09386	3.88959	1.43678	1.321	1.58395	1.49573	1.39276	4.70588	18.1818	15.1515	23.1481	16.6667	21.1538	11.3208	16.3265	24.0385	10.0917	14.5631	18	11.5789
17.76	0.729572	0.735864	0.995644	1.56152	0.843882	0.948617	1.36561	2.40214	2.90749	1.55763	2.23735	1.87008	1.19048	2.74914	2.7027	2.31481	1.77384	2.1777	0.932401	0.842223	0.985989	1.25611	3.21918	1.23077	0.663717	1.08835	1.54867	1.22601	1.49925	2.59928	2.88582	1.91571	1.98151	2.42872	1.49573	1.39276	4.47059	15.1515	16.1616	12.963	8.33333	19.2308	15.0943	11.2245	16.3462	13.7615	11.6505	16	21.0526
17.78	0.972763	0.735864	0.933416	0.562149	1.10759	1.50198	1.36561	1.51246	1.76211	2.1028	2.72374	2.75591	1.4411	1.97595	2.36486	1.85185	1.69993	1.91638	1.10723	1.06682	0.62273	1.39567	2.73973	1.23077	0.995575	1.53649	1.69617	0.959488	2.02399	1.58845	2.38394	1.341	2.64201	2.53432	2.02991	2.04271	5.64706	11.1111	18.1818	19.4444	16.6667	17.3077	10.3774	11.2245	18.2692	22.0183	9.70874	9	16.8421
17.8	1.26459	0.774593	1.1201	1.1243	1.00211	1.18577	1.42768	2.31317	2.02643	1.55763	2.72374	2.06693	1.75439	1.89003	2.7027	2.16049	1.84775	1.91638	0.641026	1.12296	0.934094	0.697837	3.08219	1.02564	0.663717	1.92061	2.35988	1.01279	1.57421	1.94946	2.76035	1.53257	2.37781	3.2735	2.77778	1.94986	3.76471	9.09091	23.2323	17.5926	18.75	17.3077	16.9811	22.449	11.5385	21.1009	14.5631	21	12.6316
17.82	1.0214	0.890782	1.30678	1.1243	1.10759	1.58103	1.8622	2.31317	1.93833	2.18069	2.33463	1.67323	1.50376	2.4055	2.47748	3.08642	1.33038	1.56794	0.932401	1.01067	1.14167	2.02373	3.0137	1.74359	0.608407	1.08835	1.99115	1.17271	1.87406	1.58845	2.38394	1.81992	2.11361	1.16156	1.92308	2.87837	4	13.1313	15.1515	12.963	14.5833	12.5	13.2075	21.4286	7.69231	13.7615	13.5922	21	13.6842
17.84	0.972763	0.735864	0.933416	0.811993	0.685654	1.26482	1.36561	1.60142	2.20264	1.94704	2.43191	2.06693	1.37845	1.6323	1.8018	2.31481	1.62602	1.1324	1.68998	1.12296	0.830306	1.11654	2.67123	0.871795	1.21681	1.21639	1.84366	1.54584	1.87406	1.37184	1.88206	1.341	2.90621	2.00634	2.02991	2.04271	4.70588	12.1212	10.101	16.6667	16.6667	12.5	13.2075	15.3061	12.5	14.6789	11.6505	14	14.7368
17.86	0.924125	0.968242	0.933416	0.999375	1.10759	1.66008	1.55183	2.2242	2.37885	1.63551	2.14008	1.9685	1.62907	1.54639	2.36486	2.77778	1.99557	1.74216	0.874126	1.06682	1.34925	1.18632	2.60274	1.17949	0.884956	1.79257	1.54867	0.906183	1.87406	1.80505	2.76035	2.10728	1.71731	2.11193	1.60256	1.76416	4	15.1515	21.2121	7.40741	17.7083	16.3462	14.1509	12.2449	11.5385	12.844	4.85437	16	17.8947
17.88	0.729572	0.542215	1.36901	1.24922	0.843882	1.89723	1.17939	2.13523	3.17181	2.18069	2.14008	1.87008	1.50376	2.06186	2.47748	2.9321	1.40429	1.82927	0.757576	1.12296	0.934094	1.60502	2.32877	1.02564	0.940265	1.28041	1.99115	0.906183	2.09895	1.44404	2.133	1.341	2.37781	0.95037	2.5641	1.02136	4.47059	9.09091	19.1919	15.7407	20.8333	17.3077	12.2642	21.4286	13.4615	18.3486	17.4757	11	20
17.9	1.07004	0.852053	0.684505	1.87383	1.05485	1.26482	1.67598	2.2242	2.29075	2.49221	2.33463	1.5748	1.37845	2.49141	1.12613	2.46914	1.62602	1.91638	0.699301	0.898372	1.14167	1.46546	2.94521	0.871795	0.829646	0.896287	1.32743	1.33262	1.42429	1.80505	2.50941	2.20307	2.24571	2.00634	2.24359	1.67131	3.76471	19.1919	18.1818	20.3704	14.5833	17.3077	9.43396	15.3061	16.3462	9.17431	13.5922	11	13.6842
17.92	1.0214	0.542215	1.49347	0.874453	0.738397	1.02767	1.36561	1.51246	2.46696	1.86916	2.0428	2.06693	2.25564	2.23368	2.02703	2.62346	1.40429	2.26481	1.10723	1.57215	0.8822	1.39567	2.12329	1.48718	0.995575	1.53649	1.40118	0.959488	1.72414	1.80505	3.3877	1.62835	2.37781	1.79514	2.35043	1.94986	4.47059	13.1313	12.1212	8.33333	9.375	17.3077	14.1509	10.2041	11.5385	10.0917	12.6214	17	14.7368
17.94	1.11868	0.542215	0.995644	1.1243	1.26582	1.34387	1.92427	1.77936	1.93833	2.18069	2.43191	1.5748	1.69173	3.17869	2.02703	2.00617	1.18256	1.91638	1.34033	1.29141	0.62273	1.46546	2.32877	0.871795	0.663717	1.34443	1.69617	1.70576	1.49925	1.22744	2.63488	0.670498	1.5852	1.79514	1.28205	1.85701	4.70588	12.1212	15.1515	14.8148	11.4583	16.3462	16.9811	12.2449	19.2308	11.9266	8.73786	19	15.7895
17.96	0.680934	0.542215	1.05787	1.31168	0.685654	1.81818	1.05525	2.66904	1.85022	1.79128	2.0428	1.87008	1.69173	2.14777	1.01351	2.9321	1.18256	1.21951	0.990676	1.12296	0.985989	1.39567	2.46575	1.07692	0.719027	1.40845	1.69617	1.38593	1.64918	1.66065	2.38394	1.14943	2.37781	1.58395	1.60256	1.48561	3.76471	5.05051	13.1313	14.8148	15.625	28.8462	15.0943	21.4286	13.4615	8.25688	11.6505	13	15.7895
17.98	1.50778	0.852053	0.497822	0.874453	0.580169	1.58103	1.8622	2.40214	1.85022	1.24611	2.91829	1.87008	1.37845	1.37457	1.35135	2.46914	1.40429	2.35192	1.04895	0.898372	1.24546	1.25611	2.73973	1.07692	1.21681	1.08835	1.40118	1.27932	1.7991	1.58845	2.25847	0.862069	1.84941	1.68955	2.13675	1.67131	4.23529	20.202	19.1919	10.1852	17.7083	12.5	18.8679	22.449	17.3077	10.0917	8.73786	17	11.5789
18	0.77821	0.813323	0.995644	1.24922	0.685654	1.97628	1.11732	2.04626	2.73128	1.55763	2.14008	1.27953	1.69173	2.06186	1.68919	2.77778	1.03474	2.26481	1.51515	0.729927	0.674624	1.32589	3.08219	1.07692	0.940265	1.15237	1.17994	1.38593	1.1994	1.51625	3.26223	2.10728	2.77411	2.21753	1.49573	0.835655	3.29412	15.1515	18.1818	19.4444	8.33333	11.5385	18.8679	18.3673	15.3846	15.5963	16.5049	13	10.5263
18.02	0.583658	0.735864	1.1201	1.1243	0.738397	1.73913	1.73805	3.20285	2.73128	1.40187	2.52918	1.87008	1.69173	2.14777	1.23874	1.85185	1.84775	2.1777	0.932401	1.01067	0.726518	1.46546	2.73973	1.02564	0.553097	1.15237	1.62242	0.852878	1.87406	2.16606	3.01129	0.862069	2.24571	1.58395	1.38889	0.928505	4.47059	16.1616	12.1212	18.5185	12.5	14.4231	15.0943	13.2653	12.5	15.5963	12.6214	14	9.47368
18.04	0.583658	0.542215	0.684505	1.37414	0.685654	1.42292	1.42768	1.86833	2.81938	2.33645	2.62646	2.16535	1.4411	1.46048	1.57658	2.62346	1.33038	2.96167	0.932401	1.29141	1.08978	0.907188	3.42466	0.923077	0.884956	1.15237	1.84366	1.27932	1.57421	1.37184	2.00753	1.24521	2.64201	1.58395	1.49573	2.59981	5.41176	6.06061	15.1515	14.8148	12.5	8.65385	9.43396	14.2857	15.3846	17.4312	22.3301	16	10.5263
18.06	0.826848	0.658404	0.933416	1.24922	0.580169	0.869565	1.48976	2.13523	1.5859	2.9595	2.52918	2.3622	1.37845	1.71821	1.91441	1.69753	0.886918	1.56794	0.699301	0.729927	1.29735	1.53524	3.21918	0.871795	1.05088	1.72855	1.17994	1.17271	1.34933	1.22744	2.50941	1.53257	1.4531	1.90074	1.17521	2.32126	4.47059	16.1616	14.1414	13.8889	14.5833	12.5	9.43396	13.2653	15.3846	11.0092	13.5922	17	11.5789
18.08	1.11868	0.348567	0.497822	0.999375	0.949367	1.26482	1.24146	2.04626	1.32159	1.86916	2.82101	1.47638	1.12782	1.80412	1.91441	1.69753	1.10865	1.82927	0.815851	1.06682	1.03788	1.25611	2.87671	1.07692	0.829646	1.34443	1.32743	1.38593	1.49925	1.15523	2.63488	2.01149	1.84941	2.11193	2.13675	1.57846	3.52941	12.1212	19.1919	11.1111	18.75	21.1538	13.2075	8.16327	17.3077	11.0092	7.76699	18	14.7368
18.1	0.972763	0.697134	1.1201	0.874453	0.738397	1.42292	1.48976	1.77936	3.17181	1.86916	1.55642	2.55906	1.81704	2.14777	1.57658	2.62346	1.18256	1.39373	0.699301	1.06682	0.934094	1.18632	2.80822	1.23077	0.608407	1.40845	1.76991	1.27932	1.64918	1.08303	1.88206	1.53257	1.1889	1.47835	1.92308	1.57846	3.05882	9.09091	19.1919	12.963	12.5	15.3846	7.54717	24.4898	9.61538	13.7615	14.5631	11	16.8421
18.12	0.680934	0.271108	1.43124	0.999375	0.949367	0.55336	2.04842	2.04626	2.64317	1.7134	2.43191	2.06693	1.75439	1.6323	1.8018	1.85185	1.18256	1.48084	0.932401	1.6283	1.03788	1.18632	3.0137	0.923077	1.38274	0.960307	1.76991	1.17271	1.49925	2.16606	2.00753	1.43678	1.84941	1.05597	1.49573	1.67131	4	17.1717	20.202	8.33333	14.5833	16.3462	9.43396	11.2245	17.3077	7.33945	13.5922	15	11.5789
18.14	1.0214	0.503486	0.995644	1.1243	1.10759	1.42292	1.36561	1.86833	2.90749	1.79128	2.33463	1.47638	1.94236	2.4055	2.81532	2.31481	1.25647	2.09059	0.874126	1.06682	0.8822	1.32589	2.26027	1.33333	0.774336	1.21639	1.47493	1.81237	1.87406	1.73285	2.133	1.62835	1.84941	1.37276	0.961538	1.48561	2.58824	12.1212	17.1717	13.8889	13.5417	6.73077	14.1509	13.2653	13.4615	11.9266	12.6214	10	14.7368
18.16	0.729572	0.619675	0.995644	1.06184	0.632911	1.34387	1.24146	2.13523	2.46696	2.18069	2.0428	2.3622	1.62907	1.28866	2.02703	2.77778	1.18256	1.82927	0.990676	1.01067	0.830306	1.18632	3.28767	1.17949	0.663717	1.28041	1.69617	1.49254	2.02399	1.80505	2.88582	2.20307	1.98151	1.47835	2.13675	1.02136	3.52941	9.09091	10.101	5.55556	17.7083	16.3462	12.2642	9.18367	12.5	10.0917	16.5049	12	13.6842
18.18	1.07004	1.08443	1.61792	1.56152	0.738397	1.34387	0.931099	2.66904	1.85022	1.86916	2.62646	1.77165	1.4411	2.23368	2.13964	2.77778	1.03474	1.65505	0.641026	1.01067	0.518941	1.11654	3.49315	1.23077	0.663717	1.85659	1.54867	0.799574	1.34933	2.02166	2.25847	1.91571	1.98151	2.00634	1.06838	1.20706	4.23529	8.08081	16.1616	13.8889	13.5417	17.3077	13.2075	18.3673	18.2692	18.3486	16.5049	16	8.42105
18.2	1.11868	0.542215	1.36901	1.24922	0.632911	1.10672	1.17939	1.42349	2.73128	2.18069	2.52918	2.26378	1.06516	2.31959	1.01351	1.69753	1.25647	2.00348	0.874126	0.786075	0.674624	1.46546	2.67123	0.923077	0.995575	1.28041	1.17994	0.959488	1.27436	1.66065	2.25847	1.24521	1.84941	2.32313	1.7094	1.94986	5.88235	12.1212	15.1515	16.6667	15.625	11.5385	7.54717	13.2653	13.4615	5.50459	7.76699	13	11.5789
18.22	0.729572	0.580945	1.1201	1.24922	1.10759	1.58103	1.80012	1.42349	2.73128	2.41433	1.84825	2.26378	1.50376	2.4055	1.12613	1.38889	1.55211	1.30662	0.815851	0.898372	0.778412	1.32589	2.94521	1.38462	0.663717	1.28041	1.54867	1.17271	1.57421	1.73285	2.00753	1.53257	2.50991	3.1679	2.02991	1.29991	5.64706	19.1919	6.06061	21.2963	18.75	22.1154	13.2075	14.2857	17.3077	15.5963	12.6214	11	12.6316
18.24	1.11868	1.0457	1.05787	0.749532	0.896624	1.50198	1.36561	2.04626	1.5859	1.86916	1.94553	1.87008	1.75439	1.46048	2.7027	3.54938	0.886918	1.91638	1.04895	1.06682	1.19357	1.53524	2.73973	1.17949	1.05088	1.21639	1.40118	1.1194	1.49925	1.80505	1.88206	1.72414	2.24571	1.37276	2.02991	1.94986	3.76471	19.1919	14.1414	9.25926	14.5833	14.4231	15.0943	12.2449	12.5	18.3486	9.70874	8	9.47368
18.26	0.972763	0.813323	0.871189	1.49906	0.738397	2.13439	1.30354	1.77936	1.85022	1.7134	2.62646	2.26378	1.62907	1.6323	1.46396	3.85802	1.4782	1.1324	1.22378	1.17911	0.830306	1.25611	3.0137	1.07692	1.1615	1.34443	1.9174	1.27932	0.824588	2.02166	1.75659	1.72414	1.98151	2.11193	1.92308	1.94986	3.52941	11.1111	13.1313	11.1111	16.6667	13.4615	10.3774	11.2245	13.4615	6.42202	8.73786	17	13.6842
18.28	0.924125	0.580945	1.05787	1.1243	0.896624	1.81818	1.42768	2.13523	1.4978	1.79128	3.40467	1.77165	0.75188	1.80412	1.91441	3.39506	1.62602	1.74216	0.932401	0.786075	0.985989	0.837404	3.15068	1.07692	0.884956	0.704225	1.76991	1.17271	2.32384	1.51625	2.50941	1.24521	2.64201	1.68955	0.961538	1.94986	4	15.1515	14.1414	13.8889	9.375	12.5	14.1509	11.2245	11.5385	14.6789	5.82524	14	13.6842
18.3	1.0214	0.542215	0.871189	1.06184	1.00211	1.42292	1.36561	1.86833	2.11454	1.79128	1.75097	1.9685	1.19048	1.54639	1.8018	2.16049	1.4782	2.26481	0.874126	0.95452	0.778412	1.95394	2.73973	1.02564	1.1615	1.28041	1.69617	1.27932	1.34933	2.16606	1.75659	1.24521	1.98151	1.58395	1.17521	1.20706	4.94118	10.101	14.1414	16.6667	8.33333	7.69231	12.2642	11.2245	11.5385	9.17431	13.5922	13	17.8947
18.32	0.632296	0.619675	0.871189	1.18676	1.21308	1.18577	1.48976	2.40214	1.4978	2.02492	1.94553	1.47638	1.19048	1.6323	1.91441	1.69753	1.84775	1.74216	0.932401	0.561482	1.34925	1.46546	2.46575	0.974359	0.884956	1.28041	1.62242	1.01279	1.57421	1.73285	2.50941	1.341	2.90621	1.79514	1.38889	1.76416	4.70588	13.1313	13.1313	7.40741	11.4583	10.5769	11.3208	14.2857	17.3077	16.5138	10.6796	15	17.8947
18.34	0.535019	0.580945	0.871189	1.18676	0.896624	1.18577	1.11732	1.77936	1.32159	1.32399	2.72374	1.77165	1.19048	1.03093	2.13964	2.00617	1.10865	1.56794	1.3986	0.561482	1.24546	1.46546	3.08219	0.923077	1.21681	1.47247	1.54867	1.49254	1.42429	1.51625	2.00753	1.43678	3.69881	1.05597	1.60256	1.20706	2.58824	9.09091	11.1111	18.5185	15.625	22.1154	7.54717	15.3061	15.3846	10.0917	17.4757	8	14.7368
18.36	0.77821	0.929512	0.995644	0.936914	0.738397	1.18577	1.36561	1.9573	2.64317	1.24611	1.94553	1.77165	1.8797	2.57732	1.68919	0.925926	1.62602	2.78746	1.34033	0.617631	0.934094	1.18632	2.80822	1.23077	0.884956	1.28041	1.9174	0.906183	1.57421	2.09386	1.63112	1.72414	2.37781	2.11193	1.49573	1.57846	3.76471	9.09091	16.1616	12.037	8.33333	16.3462	13.2075	12.2449	16.3462	11.9266	8.73786	10	16.8421
18.38	0.924125	0.697134	0.622278	0.811993	0.896624	1.26482	1.36561	1.86833	2.20264	2.49221	2.72374	2.16535	1.56642	2.23368	2.13964	3.08642	1.18256	1.74216	0.874126	0.673779	1.19357	1.11654	3.42466	1.4359	0.663717	1.02433	0.958702	1.0661	1.49925	2.31047	1.88206	1.14943	2.64201	1.16156	2.02991	1.67131	5.17647	18.1818	17.1717	11.1111	18.75	13.4615	14.1509	9.18367	14.4231	18.3486	7.76699	13	17.8947
18.4	1.11868	0.774593	0.933416	0.874453	0.632911	1.18577	1.42768	1.60142	1.93833	1.40187	3.01556	1.9685	0.93985	1.37457	1.91441	1.38889	1.33038	1.48084	1.10723	1.01067	1.34925	1.67481	2.32877	1.69231	1.10619	1.08835	1.40118	1.0661	2.09895	1.66065	1.75659	1.53257	1.84941	1.58395	1.92308	1.29991	4.23529	8.08081	11.1111	12.963	9.375	3.84615	7.54717	16.3265	11.5385	11.0092	13.5922	12	9.47368
18.42	0.77821	0.464756	0.933416	1.1243	1.00211	1.50198	1.67598	1.9573	1.67401	2.1028	1.45914	0.590551	0.93985	1.6323	1.8018	1.69753	1.18256	1.48084	1.34033	0.898372	1.03788	1.32589	3.15068	1.07692	0.884956	1.02433	1.17994	1.38593	1.72414	2.02166	2.63488	1.62835	1.0568	1.79514	0.854701	1.39276	3.52941	17.1717	17.1717	8.33333	7.29167	11.5385	4.71698	17.3469	16.3462	8.25688	13.5922	7	10.5263
18.44	0.583658	0.852053	0.746733	1.24922	0.949367	1.42292	1.11732	2.40214	1.76211	2.1028	2.0428	2.26378	1.12782	2.06186	2.36486	2.31481	1.10865	2.09059	0.990676	1.34756	1.29735	1.67481	2.32877	1.28205	0.829646	1.21639	1.32743	1.43923	1.72414	1.66065	2.38394	1.91571	2.24571	0.95037	1.81624	2.50696	5.64706	16.1616	17.1717	8.33333	14.5833	8.65385	14.1509	11.2245	20.1923	11.9266	6.79612	11	10.5263
18.46	0.972763	0.774593	0.746733	1.1243	1.05485	1.34387	1.11732	2.31317	2.29075	2.49221	1.6537	1.27953	0.814536	1.54639	1.35135	2.62346	1.55211	1.30662	0.874126	1.45985	0.934094	1.25611	2.80822	1.02564	0.829646	1.21639	1.32743	0.799574	1.87406	1.73285	1.88206	1.341	1.71731	1.90074	2.02991	1.76416	4.23529	15.1515	18.1818	11.1111	10.4167	11.5385	8.49057	14.2857	6.73077	11.0092	9.70874	11	12.6316
18.48	1.11868	0.426026	1.49347	1.74891	0.738397	1.10672	1.24146	1.60142	1.5859	2.02492	2.23735	2.26378	1.8797	1.89003	1.35135	2.00617	1.03474	1.56794	0.990676	1.01067	1.03788	1.60502	3.0137	0.923077	0.663717	0.960307	1.54867	1.1194	1.87406	1.22744	3.26223	0.957854	1.84941	0.95037	2.24359	2.04271	3.52941	16.1616	11.1111	11.1111	21.875	13.4615	11.3208	10.2041	11.5385	13.7615	10.6796	9	16.8421
18.5	0.437743	0.542215	0.808961	1.31168	1.26582	1.81818	2.04842	1.9573	2.90749	1.7134	3.40467	1.37795	1.50376	1.80412	1.91441	0.925926	1.03474	1.48084	0.815851	1.34756	0.830306	1.46546	2.80822	1.17949	1.05088	1.85659	2.13864	1.17271	1.04948	1.44404	1.88206	2.01149	2.37781	1.47835	1.49573	1.29991	4.47059	14.1414	13.1313	11.1111	15.625	17.3077	14.1509	12.2449	16.3462	11.9266	8.73786	11	12.6316
18.52	0.924125	0.309837	1.1201	0.687071	0.685654	1.42292	1.24146	1.86833	1.93833	2.41433	2.91829	1.9685	1.00251	2.23368	1.91441	3.39506	1.03474	1.1324	1.10723	0.95452	0.8822	1.18632	1.91781	0.871795	0.663717	1.47247	1.84366	0.959488	1.94903	1.66065	2.00753	1.53257	1.0568	2.11193	2.02991	1.48561	4.47059	16.1616	14.1414	15.7407	9.375	11.5385	14.1509	13.2653	9.61538	17.4312	13.5922	16	13.6842
18.54	0.729572	0.852053	0.808961	1.24922	0.738397	2.05534	1.05525	2.31317	1.5859	1.63551	2.0428	2.06693	1.37845	2.31959	3.15315	2.46914	1.4782	1.74216	1.10723	0.729927	0.62273	1.11654	3.21918	1.28205	0.884956	1.79257	1.76991	1.1194	1.87406	2.02166	2.00753	2.49042	2.77411	2.63992	1.49573	1.39276	4.94118	13.1313	11.1111	12.963	10.4167	11.5385	10.3774	8.16327	14.4231	8.25688	9.70874	11	17.8947
18.56	0.875486	0.658404	0.933416	0.999375	1.16034	1.42292	1.36561	2.4911	1.5859	2.41433	2.52918	0.984252	2.00501	1.54639	2.02703	2.46914	1.33038	1.30662	1.28205	0.898372	0.8822	1.88416	3.21918	0.820513	1.05088	1.28041	1.54867	1.1194	1.49925	2.02166	2.00753	1.24521	1.4531	1.26716	2.45726	1.67131	4.23529	11.1111	16.1616	16.6667	16.6667	12.5	14.1509	14.2857	8.65385	11.0092	10.6796	12	17.8947
18.58	0.680934	0.503486	0.995644	0.999375	0.949367	1.42292	1.42768	2.04626	2.73128	1.86916	2.82101	1.5748	1.19048	2.06186	1.23874	1.69753	0.886918	0.958188	0.815851	1.12296	0.518941	1.46546	2.60274	1.4359	0.829646	1.15237	1.40118	1.33262	1.94903	1.94946	2.88582	1.72414	1.84941	1.79514	1.49573	1.11421	3.52941	9.09091	12.1212	17.5926	12.5	18.2692	10.3774	22.449	7.69231	10.0917	7.76699	16	9.47368
18.6	0.826848	0.735864	1.05787	1.24922	1.21308	1.42292	1.30354	1.24555	2.46696	2.25857	2.43191	1.47638	1.8797	2.4055	1.46396	2.31481	1.4782	1.91638	1.10723	0.673779	1.34925	1.39567	2.32877	1.02564	0.719027	0.960307	1.25369	0.639659	1.49925	1.87726	2.76035	1.05364	2.64201	1.47835	1.60256	1.02136	2.58824	24.2424	17.1717	12.963	14.5833	15.3846	18.8679	19.3878	16.3462	9.17431	9.70874	9	10.5263
18.62	0.924125	0.890782	1.24456	1.24922	0.685654	1.81818	1.48976	2.13523	1.85022	1.86916	1.94553	2.26378	1.25313	2.4055	1.91441	2.31481	1.69993	1.91638	0.757576	0.786075	0.985989	0.976971	3.15068	0.923077	1.05088	1.60051	1.54867	1.1194	1.1994	1.15523	1.50565	1.62835	1.321	1.47835	1.92308	2.50696	2.82353	14.1414	9.09091	13.8889	13.5417	11.5385	15.0943	17.3469	16.3462	6.42202	7.76699	18	10.5263
18.64	0.77821	0.503486	0.933416	1.4366	0.632911	1.34387	1.17939	2.75801	2.37885	1.94704	2.43191	1.67323	1.37845	2.14777	2.36486	2.46914	1.40429	1.39373	1.1655	1.34756	1.24546	1.81438	2.73973	0.974359	0.608407	1.21639	2.0649	0.906183	1.42429	2.52708	1.50565	1.14943	2.50991	1.37276	2.24359	1.20706	2.58824	10.101	10.101	10.1852	10.4167	20.1923	17.9245	13.2653	13.4615	13.7615	10.6796	8	9.47368
18.66	0.729572	0.658404	1.05787	1.1243	0.632911	1.18577	1.42768	2.2242	2.02643	2.02492	1.94553	1.77165	1.31579	1.46048	2.02703	2.16049	1.18256	1.30662	0.815851	1.12296	0.726518	1.81438	2.87671	1.17949	0.663717	1.85659	1.40118	0.799574	1.87406	1.44404	2.38394	1.81992	1.321	1.68955	1.92308	2.50696	5.88235	11.1111	10.101	12.037	18.75	14.4231	8.49057	16.3265	6.73077	13.7615	11.6505	9	8.42105
18.68	0.583658	0.619675	1.36901	1.24922	0.843882	1.66008	1.05525	2.2242	2.11454	1.86916	2.23735	1.37795	1.12782	1.46048	1.12613	2.46914	1.92166	2.52613	1.1655	1.01067	0.985989	1.39567	2.53425	1.28205	0.774336	1.79257	1.25369	0.799574	1.72414	2.02166	2.76035	1.24521	1.84941	1.16156	1.7094	1.48561	4.47059	12.1212	17.1717	11.1111	10.4167	10.5769	14.1509	13.2653	19.2308	7.33945	12.6214	9	12.6316
18.7	0.389105	0.503486	0.933416	1.06184	0.791139	1.26482	2.04842	1.86833	2.29075	1.94704	1.75097	2.06693	1.75439	2.14777	1.46396	1.54321	1.40429	1.30662	0.990676	0.449186	0.726518	1.25611	3.21918	1.38462	0.774336	1.47247	1.32743	1.1194	1.87406	1.51625	2.00753	0.862069	1.1889	2.00634	1.7094	1.29991	4.47059	9.09091	10.101	15.7407	10.4167	10.5769	7.54717	17.3469	10.5769	9.17431	8.73786	15	10.5263
18.72	0.583658	0.580945	1.05787	1.31168	0.896624	1.26482	0.993172	2.2242	2.02643	2.25857	1.6537	1.27953	1.31579	2.74914	1.68919	1.54321	1.4782	2.35192	1.6317	1.06682	1.24546	1.67481	2.94521	0.717949	1.10619	1.28041	1.25369	1.01279	1.1994	1.80505	3.01129	1.24521	1.84941	1.05597	3.63248	1.57846	3.52941	13.1313	7.07071	10.1852	8.33333	10.5769	12.2642	7.14286	15.3846	9.17431	11.6505	8	12.6316
18.74	1.07004	0.697134	0.808961	1.31168	1.05485	1.66008	1.42768	2.4911	2.11454	1.47975	1.84825	2.06693	1.4411	2.57732	2.25225	2.77778	0.886918	1.65505	1.22378	1.516	1.19357	1.04676	3.0137	1.4359	0.884956	1.08835	1.76991	1.17271	1.34933	1.94946	1.63112	1.62835	2.24571	1.37276	1.38889	2.04271	5.88235	16.1616	11.1111	12.963	8.33333	8.65385	11.3208	16.3265	4.80769	8.25688	16.5049	9	7.36842
18.76	0.729572	0.852053	0.871189	0.999375	1.42405	1.50198	1.17939	1.86833	2.29075	1.40187	1.26459	1.67323	1.06516	1.37457	1.57658	2.31481	1.77384	2.35192	1.34033	0.95452	0.934094	0.907188	3.08219	0.820513	0.774336	0.960307	1.69617	1.01279	1.87406	1.44404	1.75659	1.24521	2.24571	1.26716	1.28205	1.48561	2.11765	12.1212	10.101	15.7407	13.5417	15.3846	5.66038	17.3469	13.4615	14.6789	11.6505	14	8.42105
18.78	0.875486	0.542215	0.995644	1.37414	0.474684	1.42292	1.98634	2.40214	2.02643	1.86916	2.52918	1.1811	2.19298	1.89003	1.12613	2.46914	1.4782	1.21951	0.757576	1.23526	0.8822	1.53524	3.35616	1.12821	0.829646	1.15237	2.0649	1.38593	1.27436	1.73285	3.13676	1.72414	1.4531	1.37276	2.45726	1.29991	4.23529	11.1111	16.1616	8.33333	15.625	25	8.49057	10.2041	9.61538	11.0092	11.6505	11	8.42105
18.8	1.0214	0.426026	1.36901	0.811993	1.10759	1.50198	1.48976	1.9573	2.64317	3.03738	1.94553	2.06693	1.31579	2.31959	2.36486	1.85185	1.62602	2.09059	0.990676	1.57215	1.03788	1.18632	2.60274	1.12821	0.608407	1.02433	1.17994	1.17271	1.27436	1.80505	1.63112	1.14943	2.11361	2.00634	1.49573	1.11421	4	7.07071	20.202	12.037	9.375	7.69231	16.0377	11.2245	8.65385	13.7615	6.79612	10	10.5263
18.82	1.07004	0.309837	0.871189	0.749532	0.685654	1.58103	1.24146	2.31317	2.55507	2.02492	1.84825	1.5748	1.00251	1.89003	1.23874	2.46914	0.960828	1.56794	1.04895	1.17911	0.62273	1.39567	2.73973	0.923077	0.719027	1.40845	1.25369	1.27932	1.94903	2.02166	1.50565	0.957854	2.24571	1.58395	1.06838	1.57846	3.52941	11.1111	14.1414	10.1852	9.375	9.61538	8.49057	11.2245	11.5385	10.0917	11.6505	11	15.7895
18.84	0.875486	1.0457	1.05787	1.31168	0.738397	1.18577	1.80012	1.77936	2.02643	1.94704	2.52918	1.37795	1.4411	1.97595	1.57658	2.16049	1.03474	1.91638	0.874126	0.729927	0.778412	1.11654	2.32877	0.974359	0.442478	1.28041	1.25369	0.959488	1.27436	1.73285	1.88206	2.10728	2.50991	1.26716	1.7094	1.67131	2.82353	11.1111	9.09091	9.25926	10.4167	7.69231	16.9811	12.2449	11.5385	5.50459	10.6796	12	10.5263
18.86	0.875486	0.658404	1.1201	1.24922	0.632911	1.66008	0.931099	2.13523	2.46696	1.7134	1.55642	1.27953	1.4411	1.6323	1.57658	2.77778	1.55211	1.48084	1.22378	0.95452	1.08978	1.39567	2.73973	1.28205	0.774336	1.28041	1.69617	1.49254	1.57421	1.29964	2.88582	2.49042	1.71731	1.47835	1.92308	1.85701	4.23529	14.1414	13.1313	11.1111	15.625	13.4615	12.2642	13.2653	15.3846	11.0092	6.79612	15	14.7368
18.88	0.583658	0.697134	0.684505	1.49906	0.896624	1.73913	1.05525	1.9573	2.37885	2.18069	2.14008	1.1811	1.56642	1.20275	1.91441	2.31481	1.55211	1.56794	0.990676	1.01067	0.934094	1.46546	2.46575	0.512821	0.884956	0.832266	1.69617	0.906183	1.34933	1.66065	3.01129	2.01149	3.30251	2.11193	1.7094	1.85701	4.47059	14.1414	21.2121	6.48148	11.4583	10.5769	10.3774	14.2857	10.5769	6.42202	4.85437	9	9.47368
18.9	0.77821	0.735864	1.74238	1.06184	0.421941	1.34387	0.931099	2.04626	2.29075	1.79128	1.6537	1.47638	1.00251	1.37457	1.46396	2.31481	1.77384	2.00348	1.34033	0.898372	1.14167	0.76762	2.94521	1.33333	0.995575	1.02433	1.76991	0.906183	1.49925	1.80505	3.51317	1.24521	2.77411	1.79514	2.35043	1.20706	2.82353	16.1616	15.1515	9.25926	7.29167	6.73077	9.43396	14.2857	12.5	17.4312	16.5049	15	15.7895
18.92	1.50778	0.735864	1.05787	1.37414	1.10759	1.81818	1.80012	2.58007	2.11454	2.80374	2.14008	1.9685	1.31579	2.66323	1.68919	1.69753	1.40429	1.65505	0.932401	1.29141	0.570835	1.39567	3.15068	0.974359	0.497788	1.02433	1.10619	1.01279	1.72414	1.22744	2.38394	2.10728	1.98151	1.58395	1.92308	1.48561	4.23529	9.09091	8.08081	10.1852	14.5833	18.2692	13.2075	12.2449	15.3846	14.6789	11.6505	15	7.36842
18.94	0.972763	0.503486	0.622278	1.06184	0.580169	1.02767	1.48976	1.77936	1.93833	1.86916	2.0428	1.1811	1.06516	2.06186	1.57658	2.46914	1.18256	1.56794	1.04895	0.842223	0.726518	1.18632	2.32877	1.02564	1.21681	1.21639	1.47493	1.22601	1.87406	1.73285	1.75659	0.957854	1.321	1.05597	2.02991	1.20706	4.23529	12.1212	15.1515	10.1852	15.625	12.5	10.3774	15.3061	5.76923	12.844	10.6796	8	15.7895
18.96	0.875486	0.735864	1.24456	1.06184	0.791139	1.50198	1.6139	2.13523	2.11454	1.63551	2.23735	1.77165	0.75188	1.89003	1.12613	1.54321	1.25647	1.74216	0.990676	0.505334	0.830306	0.697837	2.80822	1.02564	0.829646	1.21639	0.958702	1.49254	0.974513	1.94946	2.38394	1.62835	1.5852	1.47835	1.81624	1.02136	3.05882	12.1212	13.1313	14.8148	12.5	11.5385	15.0943	16.3265	7.69231	13.7615	10.6796	13	12.6316
18.98	0.729572	0.348567	0.995644	1.31168	0.896624	1.34387	1.80012	1.86833	2.37885	2.18069	1.6537	1.67323	1.81704	2.06186	1.35135	2.77778	1.33038	2.00348	0.874126	1.34756	0.8822	1.74459	3.21918	1.23077	1.10619	1.08835	1.47493	1.1194	1.49925	1.94946	2.50941	1.14943	1.71731	1.68955	2.35043	0.835655	5.17647	15.1515	7.07071	7.40741	14.5833	7.69231	5.66038	5.10204	16.3462	8.25688	9.70874	12	14.7368
19	1.16732	0.503486	0.933416	0.936914	1.05485	1.18577	1.55183	2.84698	2.55507	1.55763	2.62646	1.5748	1.12782	2.49141	1.91441	3.08642	1.4782	0.958188	0.815851	1.23526	1.50493	1.46546	2.60274	1.74359	0.608407	1.34443	2.13864	1.0661	1.57421	1.80505	2.25847	0.862069	1.98151	1.68955	1.28205	1.02136	6.11765	12.1212	10.101	7.40741	13.5417	15.3846	12.2642	14.2857	16.3462	8.25688	6.79612	11	6.31579
19.02	0.77821	0.503486	1.18233	1.81137	1.21308	1.02767	1.73805	1.51246	2.81938	1.47975	2.0428	2.06693	1.4411	1.6323	1.23874	1.85185	1.69993	2.96167	0.641026	1.12296	0.985989	1.46546	2.19178	0.974359	0.719027	1.40845	1.76991	1.38593	1.64918	1.87726	2.133	1.341	2.64201	1.47835	2.24359	2.04271	3.29412	11.1111	16.1616	9.25926	15.625	14.4231	11.3208	14.2857	9.61538	11.0092	7.76699	18	13.6842
19.04	0.729572	0.929512	0.995644	0.811993	0.738397	1.50198	1.11732	1.51246	1.93833	1.94704	1.75097	2.3622	1.25313	2.14777	1.8018	2.31481	1.62602	2.52613	1.04895	0.898372	0.674624	2.65178	2.32877	1.12821	1.1615	1.47247	1.54867	1.27932	1.49925	1.15523	2.133	1.43678	1.98151	2.00634	0.747863	1.85701	5.64706	11.1111	17.1717	16.6667	15.625	16.3462	8.49057	13.2653	16.3462	16.5138	5.82524	11	9.47368
19.06	1.0214	0.503486	0.808961	0.874453	0.685654	1.66008	1.05525	1.24555	1.76211	1.24611	2.0428	1.37795	1.94236	1.6323	1.68919	2.62346	0.960828	1.74216	1.10723	0.786075	1.19357	1.39567	3.56164	1.33333	0.663717	1.28041	1.32743	0.852878	1.87406	1.94946	2.88582	1.24521	2.11361	1.68955	1.92308	0.928505	3.52941	18.1818	10.101	11.1111	6.25	12.5	8.49057	14.2857	8.65385	8.25688	7.76699	11	9.47368
19.08	0.535019	0.542215	1.05787	0.999375	1.05485	1.73913	1.24146	1.9573	2.29075	1.94704	2.72374	1.5748	1.31579	1.97595	1.91441	1.69753	1.55211	1.91638	0.932401	1.06682	0.467047	1.32589	3.28767	1.12821	1.10619	1.02433	2.0649	1.27932	1.64918	2.38267	1.88206	2.29885	3.30251	2.00634	1.28205	1.76416	2.82353	14.1414	14.1414	11.1111	11.4583	8.65385	11.3208	14.2857	9.61538	10.0917	3.8835	10	12.6316
19.1	1.11868	0.813323	0.871189	0.999375	0.949367	1.66008	0.993172	2.13523	2.73128	1.55763	2.0428	1.27953	1.56642	2.23368	1.12613	2.77778	1.4782	1.74216	0.990676	1.34756	1.50493	0.558269	2.73973	1.23077	0.995575	1.53649	1.62242	1.81237	1.12444	1.94946	2.00753	1.62835	1.4531	1.79514	1.49573	1.48561	3.76471	6.06061	15.1515	12.963	10.4167	9.61538	11.3208	8.16327	16.3462	12.844	9.70874	14	13.6842
19.12	0.875486	0.464756	0.995644	1.37414	1.00211	1.42292	0.993172	1.51246	1.85022	2.18069	1.84825	1.37795	1.62907	2.06186	1.68919	2.16049	1.03474	1.39373	1.1655	0.95452	0.934094	1.81438	2.19178	1.33333	0.940265	0.704225	1.54867	0.799574	2.09895	2.02166	2.25847	2.96935	2.77411	1.37276	1.7094	1.29991	5.17647	11.1111	11.1111	7.40741	7.29167	8.65385	13.2075	11.2245	9.61538	8.25688	7.76699	10	6.31579
19.14	1.0214	0.348567	1.1201	0.874453	1.10759	1.81818	1.17939	2.13523	2.02643	2.02492	1.84825	1.9685	1.31579	2.31959	1.12613	3.24074	1.55211	2.52613	1.34033	0.673779	0.830306	1.25611	3.56164	0.871795	0.995575	1.60051	1.99115	1.22601	1.7991	1.73285	2.133	1.24521	2.37781	1.79514	1.60256	2.04271	4	11.1111	12.1212	6.48148	19.7917	13.4615	12.2642	13.2653	10.5769	13.7615	9.70874	6	17.8947
19.16	1.0214	0.813323	0.56005	0.999375	0.632911	1.73913	1.67598	3.38078	2.11454	1.32399	3.11284	1.47638	1.31579	2.66323	2.36486	2.77778	1.25647	1.48084	1.51515	1.12296	0.985989	1.32589	3.15068	1.07692	1.21681	1.15237	1.40118	1.27932	1.94903	1.58845	2.133	1.53257	2.11361	1.58395	1.81624	1.76416	5.17647	11.1111	12.1212	14.8148	8.33333	16.3462	10.3774	17.3469	10.5769	8.25688	9.70874	13	11.5789
19.18	0.535019	0.890782	1.18233	1.1243	1.31857	1.10672	1.36561	2.2242	2.46696	2.57009	1.94553	1.9685	1.4411	1.97595	1.68919	1.85185	1.40429	1.56794	1.1655	1.29141	1.08978	2.02373	2.60274	1.17949	0.774336	0.960307	1.32743	0.852878	1.87406	1.73285	1.75659	1.62835	2.64201	1.37276	2.13675	1.67131	3.29412	14.1414	19.1919	11.1111	11.4583	11.5385	14.1509	9.18367	13.4615	11.9266	14.5631	9	12.6316
19.2	0.632296	0.852053	1.24456	1.37414	1.58228	1.89723	1.48976	1.86833	1.76211	2.41433	2.0428	1.87008	1.25313	1.89003	2.13964	1.54321	1.4782	2.70035	1.04895	1.17911	1.03788	0.907188	2.80822	1.12821	0.940265	1.34443	1.32743	0.852878	1.42429	1.66065	2.00753	1.24521	1.71731	2.32313	1.49573	1.39276	4.70588	17.1717	17.1717	13.8889	8.33333	14.4231	7.54717	12.2449	12.5	15.5963	16.5049	17	9.47368
19.22	0.972763	0.387297	1.24456	1.18676	0.949367	1.58103	2.04842	2.40214	1.93833	2.02492	2.91829	1.47638	0.93985	1.28866	2.25225	2.46914	1.33038	1.91638	1.68998	1.45985	1.03788	1.25611	3.49315	1.28205	1.10619	1.34443	1.25369	1.27932	1.57421	2.45487	1.75659	1.91571	1.71731	1.05597	2.45726	1.76416	4.70588	11.1111	12.1212	19.4444	12.5	9.61538	13.2075	14.2857	9.61538	7.33945	11.6505	11	16.8421
19.24	0.77821	0.813323	1.1201	1.18676	1.63502	1.26482	1.48976	1.77936	2.29075	2.72586	2.52918	2.06693	1.4411	2.06186	2.13964	2.16049	1.40429	1.91638	1.34033	1.01067	1.19357	1.18632	3.0137	1.07692	0.608407	1.47247	1.84366	1.01279	1.27436	2.02166	1.88206	1.62835	1.98151	0.844773	1.81624	1.67131	5.41176	6.06061	15.1515	12.037	19.7917	14.4231	10.3774	13.2653	13.4615	21.1009	9.70874	14	16.8421
19.26	1.0214	0.503486	1.1201	1.49906	1.00211	2.05534	1.55183	2.13523	1.85022	1.40187	1.94553	1.47638	1.25313	1.97595	2.25225	3.7037	1.40429	1.48084	1.04895	0.95452	1.03788	1.39567	3.83562	1.07692	0.995575	1.40845	1.54867	1.33262	1.42429	1.73285	2.38394	1.24521	2.24571	1.90074	2.35043	1.85701	3.05882	9.09091	12.1212	6.48148	13.5417	18.2692	20.7547	16.3265	9.61538	10.0917	9.70874	12	12.6316
19.28	0.535019	0.852053	0.746733	1.62399	1.42405	1.34387	1.6139	2.04626	2.02643	0.934579	1.26459	1.77165	1.37845	1.6323	2.25225	2.16049	1.69993	2.35192	1.28205	1.29141	1.08978	1.39567	2.39726	0.820513	0.940265	1.02433	1.62242	1.33262	0.89955	1.29964	3.63864	1.91571	2.24571	2.11193	3.4188	2.04271	4	25.2525	12.1212	13.8889	12.5	14.4231	12.2642	10.2041	18.2692	12.844	19.4175	22	15.7895
19.3	0.924125	0.619675	1.30678	0.999375	0.949367	1.50198	1.36561	2.04626	1.5859	1.94704	2.23735	1.27953	1.50376	2.31959	2.47748	2.00617	2.21729	1.21951	1.1655	0.95452	0.62273	1.74459	2.80822	1.17949	0.719027	1.53649	2.13864	1.33262	1.27436	1.29964	1.63112	1.81992	2.37781	2.21753	1.60256	1.29991	2.82353	10.101	11.1111	5.55556	9.375	14.4231	11.3208	9.18367	5.76923	12.844	9.70874	13	13.6842
19.32	0.77821	0.271108	1.18233	0.687071	1.16034	2.29249	1.42768	2.13523	2.20264	2.57009	1.75097	1.47638	1.25313	2.06186	1.91441	4.16667	1.69993	2.00348	1.3986	0.95452	1.40114	1.67481	2.94521	1.02564	1.05088	1.34443	1.99115	0.746269	1.57421	1.80505	2.50941	1.81992	1.71731	1.47835	2.24359	1.39276	3.05882	11.1111	15.1515	10.1852	18.75	9.61538	11.3208	10.2041	6.73077	18.3486	8.73786	15	13.6842
19.34	0.826848	0.735864	1.30678	1.37414	1.31857	2.21344	1.30354	2.31317	1.76211	1.79128	3.11284	0.885827	1.25313	2.49141	2.13964	2.46914	1.69993	1.21951	1.22378	1.23526	1.14167	2.02373	3.28767	0.974359	1.1615	1.34443	2.80236	1.1194	1.72414	1.80505	2.25847	2.10728	1.4531	1.37276	2.24359	2.13556	4	12.1212	17.1717	13.8889	12.5	14.4231	5.66038	7.14286	12.5	11.0092	12.6214	9	8.42105
19.36	1.36187	0.426026	0.684505	1.56152	0.896624	1.42292	1.48976	2.40214	2.46696	1.86916	3.40467	1.67323	1.56642	2.4055	2.7027	3.24074	1.69993	1.91638	1.10723	0.786075	1.14167	1.67481	3.08219	1.48718	0.774336	1.21639	1.54867	1.43923	1.57421	1.94946	2.38394	2.49042	1.98151	1.68955	2.45726	2.41411	3.52941	7.07071	17.1717	8.33333	9.375	17.3077	14.1509	20.4082	8.65385	11.0092	13.5922	18	10.5263
19.38	1.11868	0.619675	1.30678	1.18676	0.632911	1.89723	2.35878	2.58007	1.5859	2.33645	2.33463	1.5748	1.19048	2.14777	1.68919	2.77778	1.33038	2.35192	0.874126	1.23526	1.14167	1.95394	3.35616	1.12821	0.774336	1.28041	1.9174	1.27932	1.87406	2.23827	2.63488	2.39464	2.90621	1.68955	3.09829	2.22841	4.23529	15.1515	18.1818	8.33333	10.4167	14.4231	14.1509	12.2449	7.69231	12.844	9.70874	13	14.7368
19.4	0.972763	0.697134	1.43124	1.62399	0.949367	1.97628	1.6139	2.40214	2.73128	1.55763	2.43191	1.67323	1.69173	2.31959	2.47748	1.08025	1.40429	1.48084	1.51515	0.842223	0.985989	1.95394	3.42466	1.12821	0.995575	1.79257	2.50737	1.86567	2.24888	2.09386	2.63488	2.49042	2.37781	2.11193	3.31197	2.04271	2.58824	13.1313	18.1818	16.6667	12.5	14.4231	8.49057	15.3061	11.5385	11.9266	5.82524	13	12.6316
19.42	0.77821	0.658404	1.30678	1.18676	0.843882	1.42292	1.42768	2.58007	2.81938	2.72586	2.33463	2.55906	1.25313	2.66323	2.25225	3.08642	1.92166	2.26481	0.932401	1.34756	1.14167	1.46546	3.42466	1.48718	0.995575	1.60051	1.32743	1.65245	2.09895	1.73285	2.50941	2.58621	2.37781	2.32313	1.92308	1.85701	3.05882	11.1111	20.202	12.963	17.7083	15.3846	13.2075	16.3265	10.5769	7.33945	8.73786	12	7.36842
19.44	1.11868	1.16189	1.18233	1.81137	1.58228	1.66008	1.55183	3.02491	2.73128	2.33645	3.01556	2.3622	1.75439	2.31959	1.8018	2.16049	1.77384	2.96167	1.22378	1.12296	0.934094	2.37264	2.87671	0.974359	1.21681	1.66453	1.84366	1.17271	1.27436	1.94946	2.63488	2.58621	3.03831	1.79514	1.81624	2.41411	4	18.1818	12.1212	13.8889	16.6667	11.5385	16.0377	5.10204	8.65385	10.0917	17.4757	18	9.47368
19.46	0.875486	0.697134	1.05787	1.81137	0.949367	1.73913	1.30354	3.02491	2.64317	2.9595	3.11284	2.16535	2.06767	1.89003	2.02703	3.08642	1.40429	2.61324	1.45688	1.01067	1.08978	1.67481	3.21918	1.07692	0.829646	1.66453	1.32743	1.75906	2.17391	1.80505	2.50941	2.10728	2.24571	2.11193	1.92308	1.48561	3.52941	13.1313	14.1414	18.5185	11.4583	7.69231	16.0377	14.2857	18.2692	11.0092	10.6796	15	10.5263
19.48	1.21595	0.890782	1.55569	2.24859	1.00211	3.00395	1.98634	3.11388	2.02643	2.88162	2.62646	1.67323	1.8797	2.57732	2.25225	1.54321	1.99557	2.00348	1.45688	0.95452	1.60872	2.09351	3.56164	0.871795	0.719027	1.15237	2.21239	1.38593	2.09895	2.23827	2.25847	2.39464	3.30251	2.21753	2.77778	2.69266	5.64706	18.1818	13.1313	10.1852	11.4583	18.2692	14.1509	7.14286	12.5	12.844	12.6214	5	8.42105
19.5	0.972763	0.852053	1.05787	1.93629	1.31857	2.29249	1.6139	2.4911	3.0837	3.03738	3.01556	1.77165	1.94236	2.4055	2.02703	3.08642	2.14339	2.09059	0.990676	1.06682	1.45304	1.81438	3.42466	1.33333	1.27212	1.66453	1.17994	1.75906	2.47376	1.73285	2.76035	3.44828	2.64201	3.2735	2.88462	3.06407	4.70588	7.07071	18.1818	12.037	11.4583	8.65385	9.43396	15.3061	18.2692	11.0092	7.76699	12	9.47368
19.52	1.26459	0.929512	1.55569	2.68582	1.37131	1.58103	2.60708	3.73665	3.70044	2.18069	3.01556	1.5748	2.38095	3.69416	3.6036	2.62346	1.69993	2.70035	2.03963	1.17911	1.29735	1.39567	4.24658	1.33333	1.38274	1.72855	1.62242	1.38593	2.47376	2.23827	4.266	3.54406	2.50991	2.63992	2.77778	1.76416	6.11765	15.1515	14.1414	12.963	11.4583	12.5	8.49057	15.3061	11.5385	11.0092	11.6505	14	15.7895
19.54	1.41051	1.08443	1.55569	2.06121	1.63502	1.89723	1.24146	3.20285	2.99559	3.19315	4.18288	2.46063	1.81704	2.57732	3.37838	2.31481	2.43902	2.87456	2.03963	1.6283	1.29735	2.16329	3.49315	1.53846	1.1615	1.85659	2.58112	1.75906	2.32384	1.80505	3.76412	4.31034	2.77411	2.85111	3.4188	3.43547	5.41176	13.1313	15.1515	12.963	18.75	11.5385	11.3208	9.18367	8.65385	11.0092	7.76699	9	9.47368
19.56	1.31323	1.31681	2.30243	1.62399	1.52954	2.45059	1.6139	4.18149	3.0837	1.63551	3.6965	2.55906	2.3183	3.69416	3.49099	3.39506	3.10421	2.87456	2.03963	1.7406	1.66061	1.88416	3.15068	1.33333	1.21681	1.53649	2.13864	1.70576	2.09895	2.67148	4.51694	1.72414	2.50991	3.0623	3.95299	4.17827	6.11765	16.1616	11.1111	10.1852	12.5	13.4615	16.0377	13.2653	16.3462	11.9266	13.5922	13	14.7368
19.58	1.50778	1.20062	1.55569	1.87383	1.42405	2.6087	1.80012	3.64769	3.52423	3.73832	3.40467	3.54331	3.07018	2.4055	3.37838	3.24074	2.66075	3.3101	1.57343	1.40371	1.45304	2.16329	4.0411	1.69231	0.995575	1.66453	2.50737	0.906183	2.77361	2.38267	4.14053	2.96935	2.11361	2.63992	2.88462	4.17827	6.35294	13.1313	7.07071	13.8889	12.5	12.5	11.3208	14.2857	12.5	9.17431	13.5922	17	14.7368
19.6	1.60506	1.433	2.17797	2.06121	1.52954	3.083	2.48293	4.80427	3.96476	3.03738	3.30739	1.77165	2.50627	2.83505	3.49099	2.46914	2.06948	3.3101	2.331	1.40371	1.45304	1.88416	3.0137	2.05128	1.76991	2.24072	2.50737	1.75906	2.9985	3.1769	3.51317	3.9272	1.98151	3.48469	2.5641	3.34262	5.17647	8.08081	13.1313	10.1852	15.625	13.4615	11.3208	4.08163	12.5	10.0917	10.6796	16	7.36842
19.62	1.75097	1.433	1.86683	2.24859	1.58228	2.84585	2.91744	4.09253	3.78855	2.80374	4.37743	3.24803	1.81704	3.69416	3.82883	4.32099	3.17812	4.09408	1.80653	1.40371	2.23145	2.30286	3.76712	1.79487	1.54867	2.1767	2.13864	2.02559	3.07346	3.4657	3.01129	2.87356	2.64201	2.53432	3.63248	3.06407	8	19.1919	12.1212	10.1852	12.5	9.61538	16.9811	11.2245	11.5385	7.33945	5.82524	13	14.7368
19.64	1.84825	1.16189	1.99129	2.37352	2.26793	4.42688	2.7933	4.62633	4.05286	3.42679	3.21012	2.06693	2.63158	2.83505	3.15315	3.7037	2.43902	3.39721	2.331	1.23526	2.02387	3.27983	4.93151	1.94872	1.99115	1.92061	3.31858	1.75906	3.29835	3.03249	4.14053	3.06513	1.71731	3.69588	3.31197	3.06407	6.11765	17.1717	21.2121	12.037	15.625	13.4615	16.9811	21.4286	13.4615	11.0092	11.6505	15	9.47368
19.66	1.45914	1.31681	2.05352	2.8732	1.68776	1.81818	2.545	3.82562	5.02203	2.80374	3.98833	2.95276	2.69424	3.78007	2.81532	4.47531	2.73466	3.83275	1.98135	1.40371	1.86819	2.86113	5	2.20513	1.7146	1.53649	3.17109	2.02559	2.92354	3.68231	5.01882	2.58621	2.90621	3.48469	4.2735	4.54968	6.58824	16.1616	17.1717	7.40741	29.1667	19.2308	5.66038	10.2041	16.3462	11.0092	9.70874	10	13.6842
19.68	2.0428	1.51046	2.2402	2.18613	1.26582	3.71542	2.66915	4.09253	4.05286	4.12773	4.47471	4.03543	2.56892	2.31959	3.26577	4.47531	2.21729	3.39721	1.92308	1.40371	1.86819	2.30286	3.90411	1.69231	1.7146	2.36876	3.17109	2.50533	3.5982	2.23827	3.76412	3.2567	3.03831	3.1679	3.52564	3.62117	10.3529	18.1818	15.1515	12.963	11.4583	19.2308	9.43396	13.2653	9.61538	11.0092	11.6505	10	10.5263
19.7	1.79961	1.47173	1.8046	3.24797	1.37131	2.52964	2.17256	6.49466	3.34802	3.8162	3.79377	4.13386	2.88221	3.35052	3.15315	3.24074	2.73466	3.39721	2.5641	1.96519	2.54281	2.65178	4.72603	2.35897	1.7146	2.68886	3.17109	2.02559	3.5982	3.4657	4.266	2.96935	2.77411	4.01267	4.48718	4.82823	7.05882	18.1818	21.2121	19.4444	14.5833	11.5385	14.1509	21.4286	12.5	14.6789	10.6796	11	22.1053
19.72	1.79961	0.813323	1.99129	2.43598	1.63502	2.68775	3.28988	4.35943	4.22907	4.43925	4.76654	3.05118	2.50627	3.09278	3.26577	3.39506	2.88248	4.00697	2.27273	2.86356	2.02387	2.02373	5.13699	2.35897	1.1615	2.4968	4.05605	1.38593	3.52324	3.75451	5.26976	2.20307	4.75561	4.32946	3.84615	3.06407	6.11765	19.1919	13.1313	11.1111	14.5833	16.3462	12.2642	11.2245	12.5	11.0092	9.70874	13	14.7368
19.74	2.33463	1.54919	2.36465	2.81074	2.74262	2.7668	2.91744	4.89324	4.6696	3.89408	4.86381	3.74016	2.44361	3.52234	4.05405	4.47531	2.66075	3.83275	2.38928	2.47052	2.12766	2.72156	4.86301	2.51282	1.54867	2.36876	3.31858	2.71855	3.22339	2.45487	6.27353	2.77778	3.56671	4.96304	4.05983	4.27112	6.11765	14.1414	19.1919	8.33333	11.4583	9.61538	9.43396	19.3878	17.3077	13.7615	15.534	14	21.0526
19.76	1.70233	1.39427	2.55134	2.24859	2.26793	3.32016	3.22781	4.35943	5.19824	3.27103	5.44747	3.14961	3.7594	3.35052	4.05405	3.7037	3.62158	3.39721	1.45688	2.02134	2.02387	3.55897	4.31507	2.25641	1.49336	1.79257	3.90855	2.39872	3.07346	3.4657	5.39523	2.96935	4.09511	3.80148	6.08974	4.45682	5.64706	12.1212	14.1414	8.33333	14.5833	13.4615	8.49057	7.14286	12.5	9.17431	10.6796	17	15.7895
19.78	1.94553	1.62665	1.86683	2.5609	2.53165	2.9249	3.41403	4.35943	6.0793	2.88162	3.79377	2.85433	3.13283	2.74914	4.27928	3.08642	3.84331	3.48432	1.8648	2.41437	1.92008	3.62875	4.86301	2	2.2677	2.94494	3.31858	2.71855	2.69865	3.10469	5.14429	2.96935	3.56671	4.11827	4.38034	4.27112	6.58824	16.1616	17.1717	12.963	17.7083	18.2692	10.3774	16.3265	15.3846	12.844	9.70874	10	13.6842
19.8	2.09144	1.70411	2.55134	1.99875	2.79536	3.24111	3.78647	4.27046	4.5815	4.28349	4.18288	4.72441	2.56892	4.46735	3.15315	4.78395	2.95639	4.79094	2.21445	2.63897	1.92008	2.72156	4.31507	2	2.10177	3.26504	3.90855	2.98507	2.84858	3.75451	4.39147	1.43678	3.69881	3.59029	4.16667	2.87837	7.76471	16.1616	13.1313	12.037	16.6667	16.3462	15.0943	17.3469	17.3077	22.9358	13.5922	7	13.6842
19.82	1.99416	1.47173	2.05352	1.62399	2.16245	2.68775	3.16574	3.29181	4.6696	3.19315	5.54475	3.14961	2.88221	4.38144	3.6036	3.24074	3.47376	3.91986	2.21445	1.68445	1.97198	3.27983	5.06849	3.23077	1.7146	3.39309	3.76106	1.86567	4.34783	3.89892	6.52447	2.68199	5.68032	4.43506	4.2735	3.71402	8	12.1212	15.1515	11.1111	16.6667	17.3077	12.2642	11.2245	14.4231	19.2661	13.5922	20	12.6316
19.84	2.52918	1.58792	1.86683	2.43598	2.1097	4.18972	3.41403	3.82562	4.31718	3.11526	3.50195	3.14961	1.94236	3.69416	3.15315	4.32099	3.84331	4.18118	2.44755	1.85289	2.07577	3.48918	5.13699	2.87179	1.49336	2.88092	3.61357	2.23881	3.14843	3.68231	4.89335	2.20307	6.34082	4.85744	3.63248	3.43547	5.17647	14.1414	12.1212	18.5185	17.7083	12.5	15.0943	15.3061	19.2308	12.844	8.73786	20	14.7368
19.86	1.50778	1.47173	2.05352	2.37352	2.00422	3.16206	2.29671	4.18149	4.05286	3.58255	4.28016	3.44488	2.25564	3.00687	3.94144	3.24074	2.80857	3.83275	1.68998	2.80741	1.66061	2.44243	4.24658	2	1.1615	3.39309	3.83481	2.07889	2.69865	4.11552	4.89335	2.87356	3.03831	3.90707	3.20513	2.78552	6.35294	20.202	18.1818	13.8889	15.625	17.3077	15.0943	18.3673	14.4231	12.844	13.5922	10	11.5789
19.88	1.70233	1.20062	2.42688	1.62399	2.21519	2.9249	2.73122	4.89324	4.49339	3.73832	4.47471	3.44488	2.38095	3.52234	3.26577	2.46914	3.0303	3.74564	1.98135	2.02134	2.17955	2.582	4.79452	1.84615	1.54867	2.30474	3.0236	2.55864	2.62369	3.3213	5.14429	2.20307	4.62351	3.90707	3.09829	3.52832	7.52941	8.08081	20.202	16.6667	16.6667	10.5769	16.0377	14.2857	16.3462	11.9266	16.5049	16	8.42105
19.9	2.09144	1.51046	2.9247	1.74891	2.05696	2.13439	2.7933	4.62633	4.14097	2.72586	3.6965	3.05118	2.44361	2.92096	3.71622	4.32099	3.17812	3.65854	1.92308	2.18978	1.50493	3.48918	3.63014	2.10256	1.82522	3.137	3.17109	1.54584	2.69865	3.2491	4.39147	1.81992	4.75561	4.22386	3.09829	3.43547	5.41176	16.1616	17.1717	9.25926	13.5417	18.2692	16.0377	17.3469	15.3846	4.58716	8.73786	11	14.7368
19.92	1.89689	1.27808	2.61357	1.81137	1.42405	2.6087	2.17256	2.58007	3.17181	2.49221	4.47471	4.03543	3.25815	3.78007	2.81532	4.16667	2.73466	2.87456	1.45688	1.40371	1.45304	1.81438	4.93151	2.51282	1.38274	2.04866	3.09735	2.45203	2.9985	2.67148	5.64617	2.29885	4.22721	3.37909	3.52564	3.80687	5.88235	19.1919	20.202	18.5185	13.5417	9.61538	10.3774	12.2449	14.4231	10.0917	16.5049	12	12.6316
19.94	1.6537	1.0457	2.48911	1.68645	1.37131	2.45059	2.48293	4.00356	3.87665	3.27103	4.76654	4.13386	2.13033	3.00687	3.15315	3.39506	1.77384	2.70035	2.62238	2.07748	1.81629	2.86113	3.83562	1.79487	1.49336	3.20102	2.80236	2.02559	2.17391	2.38267	4.64241	2.68199	3.43461	3.48469	3.20513	2.50696	6.82353	13.1313	14.1414	18.5185	26.0417	20.1923	18.8679	19.3878	19.2308	11.0092	5.82524	21	14.7368
19.96	1.6537	0.929512	1.92906	1.93629	1.95148	1.66008	2.91744	3.64769	4.05286	3.03738	3.21012	2.75591	1.62907	2.49141	3.37838	4.47531	2.2912	3.48432	1.80653	2.02134	1.34925	2.79135	4.79452	2.20513	1.38274	2.75288	3.46608	1.97228	2.69865	3.2491	4.76788	2.29885	4.49141	2.53432	3.63248	2.87837	4.23529	14.1414	22.2222	12.037	15.625	16.3462	12.2642	13.2653	14.4231	21.1009	7.76699	15	10.5263
19.98	2.18872	1.0457	1.24456	1.74891	1.31857	1.50198	3.10366	3.02491	3.70044	3.11526	3.30739	2.65748	1.69173	3.09278	2.47748	3.08642	2.66075	2.61324	2.21445	2.13363	1.50493	2.23308	4.10959	2.10256	1.27212	1.98464	2.35988	1.81237	3.67316	3.1769	3.26223	1.53257	5.68032	2.63992	1.81624	2.32126	5.41176	15.1515	16.1616	14.8148	15.625	14.4231	16.0377	11.2245	12.5	19.2661	11.6505	14	5.26316
20	1.45914	0.852053	2.2402	1.56152	1.89873	2.21344	3.4761	3.73665	2.81938	2.02492	3.6965	3.05118	2.00501	3.69416	2.13964	2.9321	2.14339	2.70035	1.74825	1.6283	1.55682	2.02373	3.90411	1.79487	1.7146	2.43278	2.13864	1.75906	2.92354	2.31047	3.88959	2.87356	4.75561	2.95671	3.4188	3.24977	3.52941	17.1717	12.1212	11.1111	18.75	10.5769	11.3208	13.2653	15.3846	19.2661	17.4757	11	16.8421
20.02	1.70233	0.619675	1.36901	2.31106	1.31857	2.37154	2.48293	2.93594	3.52423	2.49221	3.01556	2.26378	2.3183	3.2646	3.26577	2.16049	2.06948	3.13589	1.74825	1.7406	1.14167	2.51221	4.93151	1.23077	0.940265	2.11268	2.58112	2.02559	2.69865	2.59928	4.39147	2.20307	4.88771	3.37909	3.73932	2.59981	6.11765	17.1717	17.1717	18.5185	19.7917	17.3077	9.43396	14.2857	18.2692	12.844	12.6214	14	16.8421
20.04	1.55642	1.31681	1.43124	1.93629	1.37131	2.45059	2.35878	3.82562	3.61233	3.03738	2.91829	2.06693	2.63158	2.4055	3.71622	2.77778	2.95639	2.1777	1.8648	1.79674	1.97198	2.44243	2.87671	1.4359	1.27212	1.85659	2.43363	2.1322	2.32384	2.96029	4.01506	2.87356	4.35931	3.1679	3.73932	3.24977	4.94118	20.202	22.2222	10.1852	15.625	21.1538	14.1509	13.2653	17.3077	13.7615	11.6505	19	20
20.06	1.84825	0.813323	1.24456	2.06121	1.79325	2.21344	2.91744	3.91459	3.17181	2.33645	3.21012	2.75591	2.56892	3.17869	2.36486	3.54938	2.06948	3.04878	2.62238	1.79674	1.81629	2.02373	4.38356	1.53846	1.7146	2.30474	1.9174	1.59915	1.87406	2.31047	3.76412	2.58621	5.54822	2.74551	2.99145	2.04271	6.58824	12.1212	20.202	13.8889	20.8333	17.3077	18.8679	16.3265	17.3077	16.5138	14.5631	19	21.0526
20.08	1.55642	1.12316	1.36901	2.18613	1.84599	2.29249	2.66915	3.38078	3.61233	2.64798	2.91829	2.26378	2.63158	2.66323	2.25225	3.24074	1.4782	3.39721	1.80653	1.57215	1.29735	2.44243	3.28767	2.05128	1.21681	1.21639	2.50737	1.86567	3.29835	2.67148	5.39523	2.77778	4.88771	2.74551	3.52564	2.04271	5.64706	12.1212	25.2525	14.8148	12.5	22.1154	16.0377	11.2245	11.5385	11.0092	10.6796	15	11.5789
20.1	1.60506	0.890782	1.8046	1.1243	1.89873	2.52964	2.97952	3.46975	3.17181	3.03738	3.01556	3.24803	2.13033	2.49141	1.91441	4.01235	2.2912	2.87456	2.50583	1.6283	1.29735	2.30286	4.24658	1.4359	1.21681	1.53649	2.72861	1.97228	2.09895	2.31047	3.88959	2.58621	2.64201	2.95671	2.77778	2.50696	7.52941	15.1515	14.1414	12.963	14.5833	17.3077	14.1509	15.3061	16.3462	7.33945	14.5631	15	12.6316
20.12	1.45914	0.813323	1.92906	2.18613	1.68776	1.81818	2.29671	3.20285	2.46696	2.88162	3.6965	2.16535	2.38095	2.74914	2.81532	3.85802	1.69993	2.09059	1.28205	1.40371	1.60872	2.09351	4.58904	1.12821	1.65929	1.66453	2.94985	1.43923	2.62369	3.1769	3.3877	2.01149	3.56671	4.11827	3.73932	2.04271	7.05882	12.1212	20.202	11.1111	14.5833	17.3077	18.8679	9.18367	20.1923	13.7615	15.534	20	10.5263
20.14	1.60506	0.890782	2.11574	1.49906	1.31857	3.16206	2.17256	2.58007	4.5815	2.41433	3.11284	2.46063	1.62907	3.09278	4.39189	3.24074	1.92166	2.61324	1.80653	1.79674	1.03788	1.95394	3.15068	1.23077	1.49336	2.8169	2.50737	1.38593	3.07346	2.59928	3.63864	2.01149	3.69881	2.74551	3.09829	2.13556	5.17647	24.2424	11.1111	23.1481	16.6667	20.1923	11.3208	15.3061	15.3846	16.5138	15.534	12	15.7895
20.16	1.16732	1.0457	1.24456	1.81137	1.26582	2.29249	2.29671	3.91459	2.99559	2.88162	3.40467	1.67323	2.00501	2.06186	2.36486	5.09259	3.47376	2.87456	1.8648	1.45985	1.60872	2.93091	3.21918	1.94872	1.27212	1.34443	2.58112	1.97228	2.47376	2.59928	2.88582	2.68199	4.09511	3.37909	2.99145	2.32126	5.17647	14.1414	24.2424	12.963	17.7083	17.3077	10.3774	17.3469	21.1538	22.9358	17.4757	13	12.6316
20.18	0.972763	1.00697	1.8046	1.18676	1.79325	2.37154	2.17256	3.20285	3.25991	2.41433	2.72374	2.55906	2.81955	2.23368	3.37838	5.09259	1.77384	2.61324	1.34033	1.34756	1.45304	2.44243	3.49315	1.58974	1.38274	2.30474	2.0649	1.91898	2.62369	2.96029	4.39147	2.01149	4.75561	2.53432	3.20513	2.13556	5.64706	19.1919	21.2121	15.7407	12.5	22.1154	14.1509	17.3469	18.2692	12.844	11.6505	19	28.4211
20.2	1.50778	1.23935	1.92906	1.68645	1.84599	2.45059	2.29671	2.66904	3.96476	2.1028	4.18288	3.14961	1.75439	3.09278	3.15315	2.77778	2.2912	2.78746	0.815851	1.516	1.29735	2.09351	4.31507	2.20513	1.60398	2.4968	2.58112	1.33262	2.54873	2.31047	2.50941	3.35249	3.56671	3.1679	3.20513	2.87837	5.17647	22.2222	10.101	11.1111	15.625	16.3462	18.8679	15.3061	28.8462	19.2661	11.6505	13	17.8947
20.22	1.36187	1.0457	1.30678	1.31168	2.16245	2.29249	2.42086	3.38078	2.46696	3.50467	4.0856	2.85433	1.75439	2.57732	3.37838	3.7037	1.55211	2.96167	1.57343	0.898372	1.40114	2.582	3.49315	1.4359	1.54867	2.43278	2.72861	1.81237	2.3988	3.03249	3.76412	2.77778	3.17041	3.48469	2.77778	3.34262	6.58824	20.202	16.1616	19.4444	15.625	24.0385	21.6981	16.3265	16.3462	13.7615	12.6214	21	20
20.24	1.31323	0.968242	2.05352	1.31168	2.1097	2.84585	2.35878	4.18149	3.70044	3.27103	3.79377	2.16535	1.75439	2.06186	2.7027	2.9321	2.21729	3.83275	1.3986	1.96519	1.60872	2.582	4.17808	1.89744	1.7146	1.79257	2.80236	1.86567	2.17391	2.31047	4.14053	2.58621	4.35931	3.0623	2.5641	1.57846	5.41176	16.1616	11.1111	18.5185	17.7083	14.4231	14.1509	19.3878	9.61538	22.9358	14.5631	17	17.8947
20.26	1.41051	1.35554	1.99129	1.81137	0.896624	2.29249	2.35878	3.38078	2.81938	3.58255	3.40467	2.75591	2.94486	3.43643	2.59009	3.39506	2.66075	2.61324	1.51515	1.57215	1.34925	1.95394	3.42466	1.58974	1.10619	2.04866	2.65487	2.1855	1.49925	2.02166	3.63864	2.01149	2.50991	2.85111	2.13675	2.13556	5.17647	18.1818	13.1313	21.2963	19.7917	20.1923	15.0943	16.3265	18.2692	24.7706	9.70874	20	18.9474
20.28	1.50778	1.35554	1.61792	2.43598	1.21308	1.97628	1.30354	4.09253	3.43612	2.49221	2.91829	2.46063	2.06767	2.74914	2.7027	3.54938	2.51293	2.70035	2.27273	1.45985	1.71251	2.65178	3.49315	1.74359	1.10619	2.1767	2.28614	2.07889	2.92354	2.59928	3.88959	3.16092	4.75561	3.59029	2.24359	3.15692	5.64706	27.2727	28.2828	15.7407	13.5417	14.4231	15.0943	14.2857	13.4615	14.6789	13.5922	13	12.6316
20.3	0.924125	1.12316	1.49347	1.74891	2.1097	2.29249	2.11049	2.58007	3.96476	3.03738	3.50195	2.95276	2.19298	2.92096	2.92793	3.7037	2.43902	2.35192	2.21445	1.79674	2.17955	2.30286	3.69863	1.64103	2.10177	2.04866	1.99115	1.59915	2.77361	2.38267	3.13676	2.68199	4.09511	2.95671	3.31197	2.78552	5.64706	20.202	27.2727	20.3704	21.875	18.2692	14.1509	11.2245	11.5385	12.844	19.4175	22	16.8421
20.32	1.6537	1.00697	0.995644	1.74891	1.79325	2.21344	2.11049	2.75801	2.99559	3.11526	4.66926	2.46063	2.44361	1.89003	4.05405	3.54938	2.21729	3.223	1.6317	1.96519	2.12766	1.60502	4.38356	1.79487	1.49336	2.11268	2.35988	1.59915	2.69865	2.52708	4.01506	3.35249	2.77411	2.95671	2.02991	1.76416	6.58824	13.1313	16.1616	20.3704	18.75	16.3462	11.3208	14.2857	21.1538	16.5138	10.6796	17	23.1579
20.34	1.99416	1.08443	2.11574	2.43598	1.68776	2.37154	2.17256	3.29181	2.90749	3.11526	3.50195	3.44488	2.38095	2.74914	2.81532	1.85185	2.66075	2.52613	1.8648	1.57215	1.40114	2.16329	4.38356	1.53846	1.7146	1.98464	2.35988	1.91898	2.62369	2.38267	3.63864	3.16092	2.77411	2.74551	2.45726	2.22841	7.76471	13.1313	23.2323	19.4444	16.6667	24.0385	21.6981	19.3878	10.5769	11.9266	14.5631	24	15.7895
20.36	1.84825	0.890782	2.30243	2.43598	1.26582	3.39921	3.04159	3.73665	4.31718	3.19315	3.6965	2.95276	1.75439	3.78007	2.47748	4.62963	2.36511	3.3101	2.15618	1.96519	1.24546	2.37264	4.17808	1.74359	2.04646	1.92061	2.65487	1.81237	2.54873	2.38267	3.3877	3.73563	3.43461	3.37909	2.77778	4.08542	7.05882	19.1919	22.2222	15.7407	13.5417	23.0769	16.0377	22.449	21.1538	17.4312	19.4175	25	15.7895
20.38	1.94553	1.0457	2.11574	1.99875	1.63502	3.083	2.73122	4.09253	3.25991	3.42679	2.72374	2.26378	2.38095	3.00687	2.7027	3.39506	2.43902	3.65854	2.0979	2.18978	2.02387	2.37264	2.87671	2.61538	2.04646	2.1767	2.13864	2.39872	3.52324	2.52708	5.5207	3.44828	2.37781	2.85111	4.05983	3.24977	6.11765	17.1717	25.2525	20.3704	19.7917	23.0769	16.9811	24.4898	24.0385	16.5138	11.6505	22	21.0526
20.4	1.11868	1.16189	1.92906	3.37289	1.74051	2.6087	2.73122	3.64769	3.78855	4.12773	3.50195	3.14961	2.44361	2.74914	3.49099	2.77778	2.51293	3.13589	1.80653	1.85289	1.71251	2.16329	3.9726	2.25641	2.37832	3.39309	2.94985	1.97228	2.69865	2.59928	5.14429	2.49042	2.77411	2.95671	4.05983	2.59981	7.76471	22.2222	21.2121	16.6667	20.8333	14.4231	21.6981	18.3673	14.4231	23.8532	16.5049	22	18.9474
20.42	1.75097	1.12316	2.55134	3.18551	2.4789	3.24111	1.55183	4.7153	3.0837	3.34891	4.18288	2.85433	1.81704	2.23368	4.16667	4.78395	2.14339	3.83275	2.38928	1.68445	2.49092	2.44243	4.38356	2.41026	1.76991	2.56082	3.31858	1.43923	3.29835	2.67148	4.64241	3.83142	2.77411	2.63992	3.73932	3.15692	8.47059	20.202	23.2323	23.1481	20.8333	21.1538	19.8113	15.3061	19.2308	26.6055	9.70874	14	18.9474
20.44	1.75097	1.39427	2.61357	3.49781	2.05696	2.7668	2.29671	4.00356	3.96476	3.19315	2.82101	3.64173	2.19298	3.78007	4.05405	4.47531	2.58684	3.48432	2.21445	1.7406	2.49092	2.79135	4.52055	2.25641	2.32301	2.1767	2.94985	2.1855	3.22339	3.3213	5.64617	3.35249	3.30251	4.54065	3.31197	3.71402	5.64706	14.1414	30.303	25.9259	18.75	17.3077	19.8113	22.449	19.2308	17.4312	13.5922	23	16.8421
20.46	1.94553	1.39427	3.04916	3.18551	2.16245	2.7668	2.7933	5.42705	3.43612	3.03738	3.59922	3.54331	2.3183	3.78007	5.63063	3.39506	3.17812	3.74564	2.7972	1.85289	2.90607	3.0007	3.76712	2.15385	3.20796	2.1767	2.87611	2.66525	3.5982	3.53791	4.76788	4.5977	5.15192	3.48469	2.99145	2.97122	6.82353	17.1717	28.2828	25.9259	20.8333	23.0769	20.7547	20.4082	16.3462	22.0183	18.4466	20	22.1053
20.48	2.23735	1.47173	2.61357	3.62274	1.95148	3.63636	2.545	5.07117	4.49339	4.04984	2.91829	3.54331	2.50627	3.17869	4.84234	4.32099	2.88248	3.65854	2.73893	1.34756	2.33524	3.48918	3.69863	2.35897	2.2677	3.20102	2.58112	2.1855	2.47376	3.61011	4.39147	5.65134	3.17041	3.59029	5.87607	4.54968	10.8235	22.2222	28.2828	22.2222	33.3333	16.3462	20.7547	22.449	20.1923	22.0183	21.3592	16	16.8421
20.5	1.70233	1.31681	2.98693	4.74703	2.74262	3.63636	2.60708	5.87189	3.61233	3.97196	5.15564	3.44488	2.75689	3.69416	4.95495	4.32099	2.73466	4.09408	2.91375	2.58282	2.80228	3.4194	4.58904	3.64103	3.31858	3.00896	3.0236	2.34542	3.97301	3.68231	5.64617	8.5249	3.96301	3.37909	4.2735	3.80687	6.11765	23.2323	30.303	25	23.9583	24.0385	26.4151	18.3673	23.0769	21.1009	15.534	18	21.0526
20.52	1.84825	1.433	2.86248	4.49719	1.84599	5.61265	2.545	6.6726	4.40529	4.20561	5.83658	2.95276	3.3208	2.92096	3.04054	5.70988	3.47376	3.91986	2.85548	2.47052	3.11365	3.48918	4.86301	2.46154	3.76106	3.90525	2.80236	2.61194	4.87256	4.40433	6.14806	9.8659	3.43461	3.59029	4.91453	3.89972	8.23529	23.2323	31.3131	23.1481	22.9167	27.8846	10.3774	21.4286	24.0385	20.1835	17.4757	21	18.9474
20.54	2.91829	1.82029	4.0448	5.1218	4.37764	5.8498	2.7933	6.9395	5.46256	4.90654	4.57198	3.14961	3.82206	4.811	4.5045	5.09259	3.39985	5.05226	3.9627	2.97586	3.63259	3.8381	5.82192	3.28205	3.59513	3.71319	3.46608	2.23881	4.04798	4.69314	4.64241	9.48276	3.17041	3.37909	5.44872	4.36397	9.88235	27.2727	22.2222	29.6296	25	13.4615	23.5849	30.6122	26.9231	21.1009	11.6505	21	18.9474
20.56	2.91829	2.43997	3.79589	7.24547	4.00844	5.5336	3.22781	8.18505	4.05286	3.66044	4.66926	3.05118	3.7594	4.63918	5.51802	4.78395	5.69106	7.66551	3.67133	3.31275	3.99585	3.48918	4.24658	3.4359	4.81195	4.09731	4.05605	2.45203	5.3973	4.98195	7.27729	11.7816	5.01982	4.96304	4.59402	5.75673	8.47059	18.1818	23.2323	28.7037	36.4583	23.0769	19.8113	23.4694	30.7692	22.9358	15.534	14	23.1579
20.58	3.0642	2.16886	4.10703	6.37102	4.95781	8.14229	3.04159	7.91815	6.69604	4.98442	5.83658	4.33071	3.88471	4.811	4.84234	8.02469	5.39542	8.7108	4.95338	3.032	4.04774	3.76832	4.86301	4.61538	5.03319	3.39309	4.64602	3.67804	6.82159	5.12635	6.27353	13.1226	3.96301	5.06864	6.51709	6.22098	10.5882	23.2323	32.3232	27.7778	34.375	23.0769	30.1887	22.449	27.8846	18.3486	15.534	19	21.0526
20.6	3.55058	2.98218	4.29371	8.55715	5.53797	6.64032	4.28305	9.69751	7.31278	6.15265	6.80934	4.72441	3.69674	4.72509	6.86937	6.17284	5.02587	9.23345	5.06993	3.032	5.81214	4.74529	7.32877	4.82051	7.63274	3.90525	5.0885	3.62473	8.9955	4.54874	7.52823	14.8467	4.62351	6.1246	7.15812	7.89229	8.70588	24.2424	23.2323	18.5185	28.125	27.8846	22.6415	20.4082	22.1154	23.8532	16.5049	36	22.1053
20.62	3.50195	2.98218	6.09832	9.49407	5.06329	8.53755	4.46927	11.6548	8.45815	4.75078	6.32296	4.82283	4.88722	5.75601	7.9955	6.32716	6.94752	10.1045	6.29371	3.76193	6.12351	4.95464	7.60274	5.69231	7.90929	5.56978	5.75221	4.58422	10.9445	6.35379	5.89711	16.5709	3.43461	4.96304	6.83761	8.91365	9.64706	21.2121	31.3131	19.4444	32.2917	40.3846	19.8113	26.5306	32.6923	20.1835	14.5631	25	23.1579
20.64	4.0856	3.71805	6.47169	11.3054	6.54008	9.16996	5.40037	16.1922	10.2203	6.07477	8.26848	6.39764	6.20301	7.73196	11.5991	10.4938	9.97783	12.7178	7.45921	4.71645	7.16139	6.4201	8.08219	6.76923	10.0664	6.97823	5.89971	4.63753	11.4693	7.36462	8.53199	14.6552	3.96301	7.49736	8.54701	9.935	13.4118	30.303	31.3131	18.5185	26.0417	36.5385	20.7547	39.7959	25.9615	35.7798	27.1845	26	17.8947
20.66	3.79377	4.60883	8.9608	11.6802	7.91139	12.7273	6.33147	19.8399	11.5419	8.02181	9.63035	8.26772	6.57895	8.24742	13.8514	10.3395	11.0865	13.5017	8.21678	4.37956	8.30306	6.48988	9.45205	6.46154	13.1637	7.29834	7.37463	6.23667	12.8936	8.37545	11.7942	14.8467	3.69881	9.3981	9.0812	10.3993	13.1765	28.2828	42.4242	25.9259	25	28.8462	17.9245	24.4898	31.7308	18.3486	27.1845	22	33.6842
20.68	5.15564	5.26723	8.33852	15.2405	8.80802	13.5178	6.82806	28.7367	13.2159	10.2025	11.0895	8.07087	9.64912	8.33333	15.4279	10.0309	12.7864	18.2927	10.8974	5.22179	9.34094	9.69993	9.79452	7.17949	15.7633	6.91421	10.9882	7.72921	16.2669	11.4801	8.90841	12.6437	5.81242	8.34213	13.5684	11.6992	17.8824	17.1717	33.3333	34.2593	35.4167	19.2308	30.1887	23.4694	33.6538	28.4404	33.9806	35	26.3158
20.7	7.10117	7.35864	13.0678	17.1143	11.4451	16.996	7.01428	36.4769	16.3877	11.1371	13.5214	12.6969	11.5915	10.9966	19.3694	11.4198	14.1168	17.9443	14.8019	7.18697	10.3269	10.7467	12.2603	9.38462	16.2611	10.6274	12.3156	7.83582	13.1934	12.5632	13.4253	7.95019	5.15192	13.3052	13.2479	15.0418	16.9412	39.3939	36.3636	24.0741	38.5417	33.6538	21.6981	39.7959	33.6538	29.3578	18.4466	35	22.1053
20.72	8.65759	11.1154	15.4325	17.0518	12.1835	17.5494	8.25574	38.79	19.7357	12.3832	17.4125	14.5669	13.5965	12.8007	20.1577	13.7346	14.4863	20.0348	16.8415	6.73779	11.7281	11.2352	16.2329	12.9744	18.6394	13.1242	17.1091	10.2345	14.8426	15.0903	17.3149	6.51341	6.86922	13.7276	14.4231	15.4132	19.5294	25.2525	53.5354	37.037	38.5417	38.4615	21.6981	27.551	44.2308	37.6147	20.3883	21	34.7368
20.74	9.67899	14.0589	17.7971	17.4891	16.2975	23.5573	10.6766	43.1495	20.5286	15.5763	23.249	16.2402	17.4185	15.5498	23.7613	17.4383	19.4383	22.7352	20.6294	9.09601	14.1152	13.3287	16.9863	15.641	24.9447	18.9501	19.1003	11.6205	19.1154	20.1444	19.4479	5.65134	6.86922	17.2122	19.9786	16.156	23.0588	25.2525	44.4444	23.1481	41.6667	39.4231	23.5849	27.551	25.9615	34.8624	21.3592	26	30.5263
20.76	12.7432	17.1185	18.9172	15.7402	17.827	23.7945	14.0286	44.1281	24.5815	14.4081	20.0389	20.5709	18.4211	22.079	30.2928	14.8148	21.4339	24.6516	24.4755	12.1842	16.0353	15.5618	20.4795	16.7179	23.8385	21.3188	19.8378	13.5394	26.6867	23.8989	26.3488	5.2682	7.00132	19.113	26.0684	15.6917	25.1765	48.4848	34.3434	46.2963	32.2917	25.9615	34.9057	38.7755	46.1538	19.2661	32.0388	29	49.4737
20.78	14.8346	17.8544	19.8507	12.4922	20.8861	22.4506	16.0149	37.1886	27.6652	19.3146	22.6654	22.7362	20.1128	26.9759	24.8874	18.9815	24.5381	25.2613	25.3497	12.2403	15.7758	17.7251	22.3288	21.5897	28.3186	28.169	20.354	17.0043	28.5607	25.9206	21.4555	4.21456	8.45443	19.3242	25	14.0204	24	31.3131	44.4444	40.7407	42.7083	44.2308	40.566	47.9592	38.4615	31.1927	27.1845	33	38.9474
20.8	18.2393	21.1464	20.4107	9.49407	23.365	16.917	18.3116	25.8007	25.9031	25.7788	20.5253	23.4252	20.1128	23.5395	20.2703	18.2099	23.6511	20.6446	24.0093	15.3846	15.205	17.3064	26.0959	22.1026	28.8717	25.7362	19.9115	18.9765	31.7841	25.1986	23.8394	2.87356	11.3606	23.2313	25.8547	12.6277	23.7647	36.3636	44.4444	35.1852	36.4583	34.6154	32.0755	39.7959	32.6923	20.1835	25.2427	52	34.7368
20.82	19.2121	21.3013	20.1618	7.6827	21.8354	14.0711	21.9119	17.4377	20.9692	23.2087	18.4825	25.1969	15.6015	24.3127	13.8514	16.9753	23.5033	18.3798	19.1142	15.3285	14.3228	19.679	28.9726	20.4615	25.7743	27.8489	17.8466	22.1215	28.2609	23.1769	21.9573	5.2682	18.8904	23.7592	25.4274	8.4494	22.3529	34.3434	29.2929	47.2222	40.625	28.8462	24.5283	37.7551	25	27.5229	35.9223	33	38.9474
20.84	22.179	15.2208	17.4238	5.4341	19.884	10.5138	22.1601	13.6121	13.7445	20.0935	15.5642	20.4724	14.2857	24.5704	11.7117	17.1296	14.6341	15.0697	15.9091	16.2268	12.4546	16.12	27.6712	20.7692	22.0133	29.4494	15.7817	22.6013	26.3118	19.639	20.9536	4.78927	31.7041	19.8522	17.6282	7.79944	17.1765	28.2828	41.4141	25.9259	41.6667	34.6154	23.5849	42.8571	30.7692	40.367	19.4175	47	38.9474
20.86	21.2062	10.2634	12.8189	4.80949	12.4473	9.01186	20.4842	8.27402	11.63	17.134	9.33852	18.5039	9.83709	22.2509	8.22072	12.8086	11.9734	11.324	9.73193	18.192	9.54852	13.2589	22.1233	14.359	16.3164	25.9283	12.7581	23.1343	23.3133	15.8123	21.33	4.31034	45.7067	15.9451	12.6068	5.94243	13.1765	32.3232	44.4444	35.1852	45.8333	33.6538	39.6226	48.9796	38.4615	39.4495	34.9515	39	46.3158
20.88	18.823	7.7072	9.58307	3.37289	8.64979	6.64032	18.4358	5.42705	8.81057	10.1246	7.58755	13.7795	8.58396	18.3849	8.22072	10.3395	10.3474	8.7108	6.87646	15.8338	6.53866	9.4208	19.2466	13.3333	13.4956	20.4225	9.80826	18.3902	16.3418	12.852	13.4253	3.35249	43.5931	12.566	8.76068	5.19963	14.1176	44.4444	30.303	38.8889	52.0833	40.3846	32.0755	21.4286	34.6154	34.8624	23.301	48	41.0526
20.9	14.7374	5.22851	8.08961	3.12305	5.6962	5.05929	13.594	3.91459	6.0793	9.11215	5.54475	10.4331	5.26316	14.1753	4.5045	8.33333	8.13008	8.36237	4.72028	13.4194	4.67047	8.02512	14.4521	8.46154	9.40265	15.4289	9.80826	13.6994	9.14543	8.66426	12.4216	3.63985	32.2325	9.5037	6.19658	4.82823	11.5294	34.3434	46.4646	45.3704	43.75	50.9615	28.3019	36.7347	53.8462	38.5321	35.9223	43	44.2105
20.92	10.3599	2.63362	4.97822	2.74828	4.48312	3.16206	9.24891	5.24911	5.63877	7.55452	4.96109	6.69291	3.50877	12.6289	3.15315	7.71605	5.54324	6.18467	3.4965	10.3313	3.68448	6.8388	8.56164	6.20513	7.02434	10.4353	6.85841	10.0746	5.62219	6.49819	11.5433	2.49042	30.5152	5.80781	5.98291	4.54968	12	33.3333	35.3535	45.3704	34.375	48.0769	37.7358	46.9388	48.0769	40.367	23.301	41	33.6842
20.94	7.29572	1.82029	3.3603	3.87258	3.11181	3.95257	6.9522	4.89324	4.84581	4.6729	5.44747	5.41339	3.57143	5.84192	3.71622	7.71605	4.95196	5.13937	3.20513	8.42223	2.6985	4.81507	7.12329	3.58974	3.59513	5.18566	6.34218	5.97015	5.62219	5.27076	8.03011	2.96935	24.8349	6.1246	4.48718	4.27112	12	30.303	39.3939	42.5926	47.9167	42.3077	42.4528	41.8367	47.1154	43.1193	33.0097	36	35.7895
20.96	5.107	1.78156	3.67144	2.31106	2.63713	4.58498	5.21415	3.20285	5.28634	5.68536	4.0856	4.42913	2.50627	5.24055	3.82883	8.02469	4.43459	5.66202	3.0303	6.85008	2.95797	3.8381	5.9589	2.92308	2.87611	4.41741	4.27729	4.15778	3.37331	4.47653	7.52823	4.69349	21.7966	5.70222	4.91453	5.01393	10.1176	34.3434	38.3838	39.8148	44.7917	41.3462	46.2264	53.0612	49.0385	47.7064	37.8641	38	48.4211
20.98	3.16148	1.70411	2.80025	2.06121	2.42616	4.74308	4.65549	3.64769	4.05286	3.19315	5.15564	4.52756	3.38346	4.55326	4.5045	6.48148	3.7694	4.79094	3.43823	3.20045	2.95797	4.04745	6.0274	3.17949	2.98673	3.90525	5.75221	3.2516	3.82309	4.33213	7.02635	3.06513	16.2483	6.44139	4.80769	4.36397	10.8235	28.2828	49.4949	44.4444	27.0833	60.5769	34.9057	41.8367	48.0769	51.3761	28.1553	51	52.6316
21	3.59922	1.23935	1.8046	2.5609	2.1097	3.16206	3.35196	4.62633	3.61233	3.19315	3.98833	4.03543	3.57143	4.63918	4.39189	4.78395	2.80857	4.70383	3.0303	3.70578	2.17955	3.48918	6.23288	2.5641	3.15265	3.64917	3.68732	2.93177	4.27286	4.47653	7.15182	4.21456	15.1915	5.38543	4.91453	3.52832	10.8235	29.2929	43.4343	50	46.875	46.1538	38.6792	55.102	38.4615	45.8716	29.1262	43	43.1579
21.02	3.40467	1.39427	2.48911	2.49844	2.63713	2.68775	3.84854	3.82562	3.96476	3.8162	4.18288	3.44488	3.50877	3.09278	3.71622	4.47531	3.0303	4.87805	2.50583	3.20045	2.6985	3.76832	5.47945	2.25641	2.76549	3.137	4.57227	2.77186	3.97301	3.3935	4.89335	3.06513	14.531	3.80148	4.38034	4.36397	10.1176	17.1717	49.4949	51.8519	42.7083	49.0385	37.7358	51.0204	43.2692	39.4495	46.6019	52	40
21.04	2.96693	1.47173	2.42688	2.68582	2.37342	2.84585	3.4761	4.18149	4.40529	4.04984	5.54475	3.44488	3.13283	5.15464	3.37838	5.8642	3.69549	4.26829	2.68065	3.2566	2.28334	3.55897	5.34247	1.79487	2.48894	3.20102	4.20354	3.46482	4.42279	3.53791	6.64994	3.35249	11.3606	4.85744	4.70085	3.15692	10.1176	42.4242	39.3939	36.1111	41.6667	56.7308	46.2264	51.0204	53.8462	66.9725	35.9223	45	44.2105
21.06	2.0428	1.433	2.61357	1.81137	2.95359	2.6087	3.41403	3.73665	4.05286	3.89408	4.37743	3.64173	2.81955	3.78007	3.04054	5.55556	3.47376	5.92334	2.5641	2.97586	2.28334	2.79135	5.13699	2.61538	2.04646	2.62484	3.90855	2.77186	3.37331	3.3935	6.64994	3.2567	8.98283	5.06864	3.4188	4.73538	10.3529	39.3939	58.5859	33.3333	38.5417	49.0385	38.6792	45.9184	47.1154	45.8716	33.0097	35	50.5263
21.08	2.09144	1.35554	1.86683	2.06121	2.37342	4.11067	2.91744	4.35943	4.84581	4.12773	4.47471	3.34646	2.56892	3.69416	4.61712	6.48148	3.10421	4.96516	2.68065	2.24593	1.71251	2.65178	4.52055	2.46154	2.59956	2.8169	3.76106	2.50533	3.29835	3.2491	6.14806	2.39464	9.64333	3.48469	4.59402	4.08542	12.4706	31.3131	42.4242	40.7407	45.8333	60.5769	33.9623	41.8367	39.4231	55.0459	38.835	37	31.5789
21.1	1.99416	1.27808	2.42688	1.68645	2.8481	3.55731	3.22781	2.93594	4.93392	4.12773	4.37743	4.03543	2.63158	3.60825	3.82883	5.40123	2.88248	3.83275	2.50583	2.13363	2.28334	3.34962	5.27397	3.02564	1.99115	2.43278	3.31858	2.77186	3.5982	3.89892	5.77164	4.21456	7.13342	5.27983	3.52564	4.17827	13.4118	35.3535	57.5758	50	34.375	50	39.6226	44.898	43.2692	56.8807	40.7767	53	41.0526
21.12	2.57782	1.78156	2.36465	1.62399	2.26793	2.6087	2.7933	3.02491	4.93392	3.8162	4.0856	3.64173	2.50627	4.29553	4.27928	4.16667	2.88248	3.74564	1.74825	2.35823	1.71251	2.86113	5.34247	2.35897	1.49336	2.75288	3.09735	1.97228	4.04798	3.10469	4.76788	2.58621	8.85073	4.54065	3.84615	4.54968	9.64706	25.2525	62.6263	53.7037	48.9583	63.4615	34.9057	56.1224	53.8462	35.7798	34.9515	45	49.4737
21.14	2.14008	1.47173	2.2402	1.93629	2.42616	3.083	3.04159	3.73665	2.46696	3.58255	4.37743	4.03543	3.25815	4.38144	4.27928	4.16667	3.84331	3.57143	2.68065	2.58282	1.97198	3.21005	4.31507	1.94872	2.04646	3.00896	2.94985	1.75906	3.74813	3.61011	6.399	2.49042	7.52972	4.22386	4.05983	3.89972	11.5294	31.3131	58.5859	48.1481	23.9583	54.8077	35.8491	42.8571	40.3846	38.5321	36.8932	58	44.2105
21.16	1.94553	1.78156	2.36465	2.5609	2.00422	3.24111	2.17256	3.82562	3.61233	4.20561	4.66926	2.65748	2.50627	3.60825	4.61712	6.48148	2.95639	4.87805	2.38928	2.86356	2.43902	2.65178	5.06849	2.10256	1.60398	3.07298	2.21239	2.1855	3.29835	3.2491	5.64617	3.54406	8.19022	5.38543	4.38034	4.08542	11.2941	32.3232	45.4545	49.0741	31.25	52.8846	43.3962	50	53.8462	50.4587	52.4272	49	44.2105
21.18	2.09144	1.31681	2.36465	2.12367	1.74051	2.6087	2.85537	3.73665	3.25991	4.28349	3.59922	4.33071	2.06767	3.86598	4.61712	6.32716	2.88248	3.13589	2.15618	2.52667	1.92008	2.79135	5.27397	1.94872	1.88053	2.4968	3.68732	2.23881	2.92354	3.75451	4.01506	2.87356	5.54822	4.64625	5.87607	4.82823	10.3529	40.404	41.4141	40.7407	38.5417	53.8462	45.283	52.0408	59.6154	47.7064	39.8058	34	56.8421
21.2	2.14008	1.23935	2.17797	1.81137	2.05696	2.37154	2.23464	4.4484	3.61233	3.89408	3.59922	4.62598	2.88221	4.12371	3.71622	6.32716	3.10421	4.3554	1.92308	2.52667	1.7644	3.76832	5.68493	1.94872	1.82522	2.36876	2.94985	2.45203	3.44828	3.10469	4.76788	3.54406	5.01982	4.01267	4.05983	4.82823	8.94118	38.3838	45.4545	45.3704	39.5833	50	25.4717	63.2653	54.8077	56.8807	34.9515	50	55.7895
21.22	2.09144	1.35554	1.99129	1.99875	1.84599	2.13439	2.35878	3.64769	4.14097	3.34891	4.47471	3.44488	2.88221	4.72509	2.81532	5.24691	3.54767	3.83275	2.27273	1.79674	1.66061	3.4194	4.79452	1.89744	2.43363	2.88092	3.53982	2.02559	2.32384	2.31047	4.64241	2.68199	8.05812	3.1679	3.95299	4.08542	10.5882	26.2626	40.404	28.7037	38.5417	40.3846	41.5094	48.9796	37.5	36.6972	35.9223	44	55.7895
21.24	2.38327	1.51046	1.99129	1.93629	2.05696	1.97628	2.545	4.00356	3.78855	3.97196	4.0856	4.62598	2.63158	3.60825	3.71622	5.70988	4.06504	5.05226	2.21445	2.35823	1.66061	2.37264	5.61644	1.58974	1.99115	2.94494	2.94985	2.45203	3.82309	3.1769	6.27353	2.58621	5.15192	5.17423	3.63248	4.08542	13.1765	27.2727	40.404	50.9259	47.9167	37.5	33.0189	53.0612	42.3077	55.0459	43.6893	47	40
21.26	1.89689	1.23935	1.86683	1.81137	1.47679	3.083	2.97952	3.38078	3.96476	3.50467	5.25292	3.34646	2.69424	4.0378	4.05405	5.40123	3.17812	4.52962	1.92308	1.34756	1.86819	2.30286	5.68493	1.94872	1.7146	2.36876	3.0236	2.34542	3.44828	2.88809	4.266	2.49042	4.35931	4.64625	3.52564	3.52832	10.8235	24.2424	40.404	31.4815	48.9583	50	32.0755	56.1224	48.0769	48.6239	42.7184	46	42.1053
21.28	2.52918	1.74284	2.11574	2.62336	1.58228	2.84585	2.85537	3.20285	4.05286	2.88162	4.0856	3.24803	2.63158	2.4055	3.49099	4.47531	1.55211	3.65854	1.92308	1.90904	1.50493	3.07048	5.27397	2.35897	1.65929	2.75288	3.53982	2.02559	2.09895	3.4657	5.39523	2.96935	5.01982	6.2302	2.99145	4.36397	9.88235	41.4141	42.4242	40.7407	41.6667	36.5385	48.1132	43.8776	37.5	46.789	27.1845	40	46.3158
21.3	1.99416	1.12316	2.42688	1.81137	1.37131	2.37154	2.48293	2.75801	3.25991	3.8162	2.62646	4.42913	2.44361	2.66323	3.04054	3.85802	2.58684	3.39721	1.80653	2.30208	1.50493	3.14027	5.13699	2.20513	1.27212	3.00896	3.24484	1.97228	2.69865	2.31047	4.64241	2.10728	4.88771	2.85111	3.20513	2.69266	6.35294	28.2828	35.3535	36.1111	34.375	35.5769	42.4528	39.7959	42.3077	43.1193	28.1553	41	43.1579
21.32	1.99416	1.08443	1.92906	2.06121	1.79325	2.6087	2.42086	3.46975	2.90749	4.20561	2.82101	3.83858	2.88221	3.43643	3.49099	5.24691	2.73466	3.48432	1.74825	1.96519	2.12766	2.23308	5.20548	2.10256	1.49336	2.24072	3.53982	2.50533	3.22339	2.52708	4.51694	3.44828	3.96301	3.59029	3.20513	3.89972	10.5882	31.3131	32.3232	45.3704	40.625	47.1154	32.0755	53.0612	39.4231	35.7798	28.1553	44	44.2105
21.34	1.6537	1.51046	1.86683	1.87383	1.47679	3.24111	2.23464	3.73665	3.87665	3.73832	2.72374	2.95276	2.19298	2.83505	2.7027	5.8642	2.2912	3.13589	2.38928	2.69512	1.50493	2.93091	4.65753	2.10256	1.65929	2.04866	2.87611	2.1855	3.07346	3.03249	4.01506	2.58621	5.15192	4.43506	4.48718	2.87837	5.88235	24.2424	31.3131	32.4074	35.4167	35.5769	34.9057	43.8776	34.6154	35.7798	28.1553	31	49.4737
21.36	2.0428	1.39427	1.99129	2.37352	1.37131	2.6087	2.60708	3.55872	3.87665	3.19315	4.76654	3.05118	1.69173	3.60825	4.84234	4.16667	2.73466	3.13589	1.80653	2.30208	1.7644	2.79135	3.69863	2.10256	1.65929	2.88092	3.09735	2.1322	2.54873	3.1769	4.89335	3.2567	4.75561	4.96304	4.05983	2.87837	9.17647	23.2323	38.3838	30.5556	36.4583	38.4615	33.9623	42.8571	29.8077	38.5321	37.8641	38	40
21.38	2.14008	1.54919	1.8046	1.99875	1.47679	1.50198	2.545	3.20285	3.43612	4.04984	4.0856	2.95276	2.25564	2.92096	3.15315	3.39506	1.99557	3.223	1.92308	2.24593	1.19357	1.95394	3.76712	2.51282	1.38274	2.30474	2.58112	1.49254	2.54873	2.38267	3.26223	2.10728	3.96301	3.48469	3.4188	4.17827	8.94118	23.2323	20.202	30.5556	32.2917	44.2308	23.5849	42.8571	42.3077	46.789	31.068	38	34.7368
21.4	2.09144	1.35554	1.92906	1.37414	1.31857	2.68775	2.91744	2.75801	3.34802	2.64798	5.44747	3.05118	1.8797	3.2646	3.37838	5.55556	2.95639	3.48432	1.92308	2.30208	1.71251	3.21005	4.72603	1.48718	1.1615	1.85659	2.72861	1.75906	2.62369	2.45487	4.266	1.91571	5.28402	3.69588	2.77778	2.78552	8.94118	20.202	31.3131	48.1481	29.1667	48.0769	19.8113	28.5714	32.6923	39.4495	31.068	33	42.1053
21.42	2.0428	1.23935	1.49347	1.56152	1.79325	2.13439	1.8622	3.64769	3.43612	2.9595	3.79377	3.44488	2.19298	3.17869	3.26577	5.24691	2.58684	2.1777	1.45688	1.85289	1.55682	2.65178	3.35616	1.53846	1.54867	1.98464	2.58112	1.75906	2.92354	1.94946	5.64617	2.87356	3.69881	2.00634	3.31197	3.52832	7.52941	23.2323	31.3131	37.963	26.0417	39.4231	27.3585	33.6735	27.8846	31.1927	26.2136	30	29.4737
21.44	1.45914	1.51046	2.11574	1.62399	1.63502	2.7668	2.23464	3.46975	2.99559	2.64798	2.62646	2.65748	1.81704	3.2646	2.81532	5.55556	2.36511	4.09408	1.34033	1.90904	1.86819	2.02373	4.17808	1.79487	1.38274	2.24072	2.43363	2.1855	2.54873	2.96029	3.88959	2.49042	5.68032	3.2735	4.38034	2.87837	10.1176	26.2626	23.2323	48.1481	18.75	34.6154	23.5849	33.6735	34.6154	27.5229	22.3301	28	30.5263
21.46	1.75097	1.23935	1.8046	1.62399	1.31857	2.13439	2.60708	2.31317	3.78855	3.11526	3.30739	1.87008	2.3183	3.09278	4.05405	3.85802	2.73466	2.70035	2.03963	2.86356	1.7644	2.23308	3.63014	1.79487	1.21681	1.92061	2.72861	2.1322	2.54873	3.10469	4.76788	2.68199	5.54822	4.85744	2.67094	3.43547	7.29412	25.2525	28.2828	20.3704	33.3333	26.9231	25.4717	34.6939	32.6923	38.5321	22.3301	25	27.3684
21.48	1.21595	1.0457	2.11574	1.68645	1.47679	1.89723	1.67598	3.02491	3.17181	2.72586	4.37743	3.24803	2.63158	3.35052	3.37838	6.48148	2.43902	2.96167	2.15618	1.85289	1.97198	3.34962	4.24658	2.15385	1.21681	1.47247	2.43363	1.75906	2.77361	3.61011	4.51694	2.29885	4.22721	3.48469	3.20513	3.80687	7.52941	19.1919	21.2121	30.5556	21.875	28.8462	30.1887	39.7959	32.6923	29.3578	21.3592	32	20
21.5	1.11868	0.813323	1.74238	2.49844	1.63502	1.50198	1.8622	3.91459	3.61233	2.88162	3.89105	1.9685	2.19298	3.43643	3.15315	3.39506	2.95639	3.13589	1.68998	1.7406	1.40114	2.51221	4.58904	2.20513	0.829646	2.30474	1.99115	1.54584	2.69865	1.94946	4.14053	2.20307	5.68032	4.01267	3.52564	2.04271	7.76471	28.2828	27.2727	29.6296	25	38.4615	32.0755	32.6531	32.6923	40.367	15.534	25	30.5263
21.52	1.60506	1.23935	1.99129	2.37352	1.52954	2.45059	2.23464	2.66904	2.55507	2.33645	3.30739	2.75591	2.19298	2.49141	3.04054	3.08642	2.36511	2.61324	1.98135	1.516	1.66061	2.93091	4.10959	1.64103	1.32743	1.98464	2.80236	2.07889	3.07346	2.31047	4.51694	1.341	3.83091	2.63992	3.20513	2.59981	5.88235	25.2525	16.1616	25.9259	20.8333	33.6538	25.4717	26.5306	25	26.6055	28.1553	24	33.6842
21.54	0.729572	0.852053	1.55569	1.37414	1.79325	2.45059	2.42086	3.11388	3.34802	2.88162	4.28016	2.3622	1.69173	3.00687	2.36486	2.46914	2.66075	4.26829	1.8648	2.13363	1.14167	2.93091	4.24658	1.07692	0.829646	1.21639	2.58112	1.86567	3.37331	3.2491	3.26223	2.01149	4.62351	3.2735	3.31197	2.97122	10.5882	23.2323	18.1818	23.1481	20.8333	28.8462	35.8491	31.6327	29.8077	20.1835	22.3301	16	28.4211
21.56	1.21595	0.774593	1.68015	1.99875	1.58228	2.37154	1.92427	2.93594	2.90749	2.49221	2.14008	2.26378	1.31579	2.49141	2.47748	5.70988	2.2912	3.04878	1.74825	1.85289	1.50493	2.72156	4.52055	1.64103	1.27212	2.1767	2.28614	1.49254	2.47376	2.59928	4.266	1.72414	5.01982	2.74551	3.63248	2.87837	6.35294	15.1515	23.2323	17.5926	19.7917	25.9615	24.5283	25.5102	26.9231	27.5229	16.5049	26	23.1579
21.58	1.50778	0.774593	1.86683	1.24922	0.949367	1.89723	1.48976	2.40214	2.90749	2.80374	3.6965	2.46063	1.94236	1.89003	2.36486	4.62963	2.2912	2.26481	1.80653	1.90904	1.71251	2.23308	3.21918	1.84615	1.76991	1.85659	1.99115	1.38593	2.09895	2.23827	4.01506	1.43678	3.17041	2.74551	1.7094	3.24977	7.29412	19.1919	10.101	21.2963	16.6667	34.6154	24.5283	25.5102	35.5769	28.4404	18.4466	23	21.0526
21.6	1.36187	0.968242	1.30678	1.18676	1.16034	1.97628	1.8622	2.31317	2.11454	2.88162	2.82101	2.26378	2.00501	2.66323	2.25225	2.9321	2.36511	1.91638	1.51515	1.7406	1.40114	2.09351	3.83562	1.84615	1.1615	1.60051	1.76991	1.70576	2.77361	2.52708	3.63864	2.10728	3.30251	2.63992	3.73932	2.97122	6.82353	16.1616	20.202	25.9259	27.0833	32.6923	30.1887	15.3061	18.2692	37.6147	21.3592	32	29.4737
21.62	1.0214	1.31681	1.49347	2.31106	1.31857	2.05534	2.29671	2.93594	2.73128	2.72586	3.6965	1.67323	2.13033	2.49141	2.81532	2.77778	2.58684	2.78746	1.3986	1.45985	1.45304	2.65178	5	1.69231	1.54867	2.04866	2.72861	1.54584	2.54873	2.88809	3.13676	0.862069	4.75561	2.95671	3.4188	2.87837	7.05882	18.1818	18.1818	32.4074	17.7083	31.7308	18.8679	21.4286	24.0385	28.4404	26.2136	19	18.9474
21.64	1.31323	1.27808	1.8046	1.56152	1.31857	1.58103	1.92427	2.66904	3.52423	2.88162	2.43191	3.74016	2.38095	3.43643	3.37838	3.54938	2.2912	2.43902	0.699301	1.7406	1.60872	2.23308	3.08219	1.28205	1.21681	1.85659	2.0649	2.23881	2.02399	3.03249	3.13676	1.43678	3.03831	1.90074	2.67094	1.76416	6.82353	16.1616	19.1919	22.2222	18.75	25.9615	19.8113	22.449	25.9615	22.9358	14.5631	21	24.2105
21.66	1.21595	1.12316	1.43124	2.31106	1.31857	1.42292	1.55183	2.58007	2.02643	3.66044	3.21012	2.75591	1.81704	2.06186	3.26577	4.47531	1.55211	1.56794	1.45688	2.18978	1.24546	1.74459	3.15068	1.69231	1.10619	2.24072	2.43363	1.75906	2.09895	2.81588	3.76412	2.01149	3.96301	2.53432	2.77778	3.24977	5.41176	20.202	16.1616	21.2963	14.5833	15.3846	17.9245	23.4694	21.1538	26.6055	17.4757	25	28.4211
21.68	1.36187	0.813323	1.05787	1.18676	0.949367	2.7668	1.80012	2.84698	2.90749	3.03738	3.01556	3.24803	1.8797	3.09278	2.47748	3.08642	2.51293	2.09059	1.98135	1.79674	1.29735	1.81438	4.24658	1.64103	0.719027	2.43278	2.43363	1.27932	2.92354	2.31047	3.63864	2.10728	4.09511	3.37909	2.02991	2.69266	6.58824	13.1313	23.2323	25	18.75	33.6538	16.0377	20.4082	23.0769	21.1009	15.534	20	14.7368
21.7	1.21595	0.774593	1.68015	1.74891	1.37131	1.73913	2.17256	2.93594	4.05286	2.25857	3.59922	1.9685	1.25313	3.17869	2.59009	2.31481	2.2912	2.78746	1.51515	1.516	1.34925	1.81438	3.76712	1.89744	1.10619	1.98464	2.80236	1.49254	2.32384	2.74368	2.63488	2.68199	3.43461	2.63992	2.88462	1.94986	7.05882	19.1919	14.1414	17.5926	15.625	24.0385	15.0943	24.4898	23.0769	18.3486	14.5631	17	11.5789
21.72	1.11868	0.774593	1.68015	1.49906	0.896624	2.29249	1.80012	3.20285	3.34802	1.7134	3.30739	1.47638	1.56642	2.66323	2.47748	3.85802	1.62602	2.1777	1.57343	1.68445	1.29735	2.09351	3.63014	1.4359	0.719027	1.98464	2.21239	1.49254	1.72414	2.81588	2.50941	1.81992	3.43461	2.74551	2.35043	3.34262	7.05882	14.1414	18.1818	26.8519	12.5	24.0385	16.9811	21.4286	21.1538	22.0183	15.534	19	12.6316
21.74	1.11868	0.852053	1.74238	1.68645	1.26582	2.37154	1.67598	2.04626	2.99559	3.27103	2.52918	1.47638	2.25564	2.57732	3.26577	3.54938	1.10865	2.61324	1.45688	1.79674	1.81629	1.74459	4.0411	1.48718	1.21681	1.72855	1.76991	1.86567	2.17391	2.09386	3.63864	1.91571	3.69881	2.42872	2.88462	2.69266	7.52941	24.2424	19.1919	24.0741	15.625	11.5385	14.1509	25.5102	20.1923	19.2661	20.3883	22	18.9474
21.76	1.55642	1.0457	1.61792	1.74891	1.05485	2.68775	1.67598	3.02491	2.64317	3.73832	2.52918	2.55906	2.00501	2.4055	1.57658	2.77778	1.92166	2.87456	1.68998	1.79674	1.24546	3.14027	3.76712	1.48718	1.1615	1.72855	1.99115	1.75906	2.24888	2.81588	3.63864	3.06513	5.01982	3.1679	3.4188	3.06407	3.29412	18.1818	15.1515	20.3704	16.6667	29.8077	13.2075	19.3878	17.3077	20.1835	24.2718	20	18.9474
21.78	1.75097	0.890782	1.24456	1.56152	1.63502	1.50198	2.17256	2.2242	3.17181	2.9595	2.52918	2.3622	2.3183	3.2646	2.59009	2.77778	1.69993	3.223	1.45688	1.23526	1.29735	2.09351	3.42466	1.84615	1.54867	2.1767	1.99115	1.97228	1.72414	2.52708	3.13676	2.10728	2.64201	3.0623	3.73932	2.32126	7.29412	17.1717	18.1818	12.037	18.75	21.1538	17.9245	18.3673	15.3846	15.5963	8.73786	24	13.6842
21.8	1.36187	1.00697	1.61792	1.56152	1.37131	1.97628	1.80012	2.66904	3.34802	2.88162	2.62646	2.3622	1.75439	1.97595	2.47748	3.7037	2.51293	2.70035	1.22378	2.02134	1.40114	2.23308	4.24658	1.74359	1.1615	1.66453	2.65487	1.33262	2.3988	2.81588	4.64241	2.29885	3.83091	2.74551	2.99145	2.50696	5.41176	28.2828	19.1919	23.1481	11.4583	26.9231	12.2642	20.4082	14.4231	22.0183	20.3883	23	11.5789
21.82	1.26459	0.735864	1.43124	2.37352	1.52954	2.21344	2.545	2.2242	3.52423	2.49221	2.0428	1.37795	1.37845	2.31959	2.59009	5.09259	2.14339	3.04878	1.51515	1.79674	1.55682	1.53524	3.83562	1.58974	1.7146	1.34443	2.21239	1.49254	1.49925	2.81588	3.76412	1.53257	4.09511	2.85111	2.5641	2.59981	6.35294	22.2222	22.2222	12.037	18.75	19.2308	15.0943	22.449	14.4231	19.2661	9.70874	16	17.8947
21.84	1.55642	0.852053	1.43124	1.99875	1.00211	3.00395	2.60708	3.55872	2.99559	4.28349	2.43191	2.46063	1.69173	3.2646	2.47748	3.39506	2.73466	2.87456	1.28205	1.68445	1.03788	2.86113	3.42466	1.64103	1.27212	2.24072	1.84366	1.49254	1.57421	3.10469	3.3877	2.01149	3.43461	2.53432	2.88462	3.43547	4.94118	13.1313	20.202	14.8148	19.7917	13.4615	16.0377	18.3673	18.2692	32.1101	11.6505	20	13.6842
21.86	1.16732	0.890782	0.871189	1.93629	1.58228	1.42292	2.04842	2.31317	2.02643	2.9595	3.11284	2.46063	2.13033	2.66323	2.13964	4.32099	1.77384	2.26481	1.22378	1.01067	1.08978	1.67481	3.90411	2.10256	1.21681	1.28041	2.0649	1.38593	2.32384	2.23827	3.88959	2.10728	3.03831	3.0623	3.20513	2.04271	4.47059	16.1616	21.2121	18.5185	9.375	21.1538	16.9811	18.3673	8.65385	21.1009	12.6214	12	20
21.88	1.79961	0.697134	1.68015	2.49844	1.31857	1.73913	2.29671	3.64769	2.99559	4.20561	2.82101	1.9685	2.25564	1.6323	2.36486	2.77778	2.14339	2.70035	1.6317	1.516	1.08978	2.51221	3.28767	2	1.65929	1.72855	2.0649	1.54584	2.32384	2.81588	3.63864	1.72414	4.22721	2.53432	3.73932	3.52832	5.64706	16.1616	16.1616	19.4444	13.5417	17.3077	16.0377	18.3673	12.5	17.4312	16.5049	11	14.7368
21.9	1.50778	0.890782	1.36901	1.81137	0.949367	1.58103	2.23464	2.66904	3.78855	4.43925	3.11284	2.26378	2.13033	3.00687	2.7027	2.77778	1.69993	3.13589	1.34033	0.95452	1.66061	2.37264	5.27397	1.84615	1.32743	1.34443	3.0236	1.43923	2.54873	2.23827	3.3877	1.24521	2.64201	2.95671	4.38034	3.89972	3.76471	13.1313	10.101	28.7037	12.5	20.1923	17.9245	16.3265	17.3077	16.5138	9.70874	20	16.8421
21.92	1.41051	1.08443	1.99129	2.62336	1.47679	2.45059	1.67598	2.4911	3.61233	4.51713	2.72374	2.75591	2.3183	2.57732	2.7027	4.32099	1.99557	2.87456	1.80653	1.68445	1.19357	2.02373	4.17808	1.53846	1.7146	2.11268	3.68732	1.59915	2.54873	2.16606	3.26223	1.43678	3.56671	3.37909	2.99145	3.43547	5.17647	9.09091	14.1414	12.037	16.6667	18.2692	15.0943	17.3469	15.3846	15.5963	19.4175	9	17.8947
21.94	1.21595	1.08443	1.92906	1.93629	1.10759	2.6087	2.04842	2.66904	3.25991	4.59502	3.40467	2.06693	3.50877	2.06186	4.61712	4.47531	1.92166	2.87456	1.3986	1.516	1.66061	3.07048	3.83562	1.94872	1.32743	1.72855	1.99115	1.65245	2.77361	3.10469	2.25847	1.62835	3.96301	3.80148	2.88462	2.50696	6.11765	16.1616	10.101	16.6667	11.4583	15.3846	16.9811	14.2857	18.2692	17.4312	9.70874	14	10.5263
21.96	1.16732	0.968242	2.05352	1.93629	1.58228	2.13439	2.42086	2.75801	2.81938	3.42679	2.72374	2.85433	3.50877	2.83505	4.27928	3.39506	2.36511	2.70035	1.28205	1.45985	1.45304	1.39567	4.17808	1.28205	1.32743	1.66453	2.35988	2.50533	2.92354	2.81588	3.88959	1.62835	2.77411	3.59029	3.63248	4.45682	4.47059	15.1515	15.1515	13.8889	23.9583	15.3846	10.3774	11.2245	11.5385	19.2661	13.5922	15	6.31579
21.98	1.6537	0.580945	1.8046	2.37352	1.63502	2.52964	2.545	3.73665	3.17181	2.9595	2.62646	3.05118	2.94486	2.23368	5.85586	2.16049	2.2912	2.78746	1.34033	1.57215	1.50493	1.95394	3.28767	1.89744	1.32743	1.79257	2.72861	2.1322	2.32384	2.81588	3.3877	1.62835	3.56671	3.69588	3.20513	3.52832	6.35294	13.1313	18.1818	12.037	14.5833	22.1154	21.6981	10.2041	17.3077	22.0183	7.76699	5	11.5789
22	1.6537	0.735864	1.49347	2.06121	1.16034	1.97628	2.91744	3.64769	2.99559	3.11526	3.11284	2.65748	2.81955	2.92096	4.39189	3.54938	2.21729	2.87456	1.51515	1.68445	1.24546	2.23308	4.10959	1.94872	0.940265	2.43278	2.21239	1.91898	2.62369	2.67148	2.76035	2.29885	3.56671	3.2735	2.13675	1.76416	4.70588	10.101	16.1616	12.037	14.5833	15.3846	10.3774	15.3061	15.3846	14.6789	11.6505	12	21.0526
22.02	1.6537	0.774593	1.68015	1.18676	1.05485	1.58103	1.98634	2.4911	2.46696	2.9595	3.01556	3.74016	1.31579	3.17869	3.49099	2.46914	2.14339	2.35192	1.04895	2.18978	1.86819	1.95394	3.76712	1.79487	1.1615	1.15237	2.65487	1.91898	2.62369	2.74368	2.38394	2.01149	3.30251	2.00634	1.81624	2.59981	3.76471	14.1414	15.1515	12.963	14.5833	19.2308	16.9811	15.3061	19.2308	12.844	14.5631	20	14.7368
22.04	1.6537	0.697134	1.61792	2.12367	1.63502	2.45059	1.55183	2.75801	3.17181	3.42679	2.52918	2.75591	1.94236	3.69416	2.59009	4.01235	2.06948	2.1777	1.34033	1.516	1.66061	1.46546	2.67123	1.28205	0.884956	1.85659	2.0649	1.65245	2.32384	2.81588	2.63488	1.72414	3.17041	2.74551	1.49573	2.50696	3.05882	13.1313	17.1717	14.8148	14.5833	14.4231	11.3208	12.2449	9.61538	13.7615	15.534	18	13.6842
22.06	1.6537	0.774593	1.18233	1.24922	1.74051	1.42292	2.42086	2.2242	2.20264	3.27103	2.62646	3.05118	2.38095	3.35052	1.8018	2.77778	2.2912	2.35192	1.10723	1.68445	1.40114	1.60502	2.87671	1.07692	0.553097	1.85659	2.0649	2.23881	2.3988	2.45487	4.14053	2.10728	4.49141	2.21753	3.31197	1.67131	4.70588	20.202	18.1818	12.037	9.375	14.4231	14.1509	9.18367	13.4615	13.7615	9.70874	15	5.26316
22.08	1.11868	0.968242	1.24456	1.18676	1.74051	1.89723	2.04842	2.2242	2.46696	2.64798	2.72374	2.26378	1.62907	3.09278	3.15315	3.24074	2.2912	2.70035	1.10723	2.30208	1.14167	2.23308	4.24658	1.84615	1.1615	1.60051	2.80236	1.65245	1.7991	2.67148	3.3877	1.341	2.77411	2.21753	2.45726	1.94986	6.11765	13.1313	10.101	14.8148	14.5833	14.4231	13.2075	15.3061	8.65385	12.844	7.76699	22	12.6316
22.1	1.60506	0.929512	1.18233	2.31106	1.31857	2.13439	1.48976	2.2242	2.99559	2.02492	3.21012	2.46063	1.4411	2.83505	1.8018	3.85802	1.99557	1.82927	1.28205	1.7406	1.55682	1.74459	3.63014	1.02564	0.829646	1.40845	2.35988	1.0661	2.62369	2.45487	2.76035	1.72414	3.03831	2.74551	1.49573	2.32126	3.05882	17.1717	15.1515	16.6667	14.5833	19.2308	10.3774	16.3265	13.4615	13.7615	11.6505	17	6.31579
22.12	1.21595	0.852053	1.55569	1.37414	0.949367	2.45059	2.23464	2.4911	1.85022	2.72586	2.52918	2.26378	1.56642	3.09278	2.13964	3.39506	2.36511	2.09059	1.28205	2.13363	0.8822	1.53524	2.87671	1.33333	0.719027	2.36876	1.76991	2.07889	1.7991	1.80505	3.76412	1.341	2.50991	2.21753	1.7094	1.67131	3.52941	15.1515	18.1818	13.8889	12.5	15.3846	17.9245	20.4082	13.4615	12.844	12.6214	19	12.6316
22.14	1.0214	0.580945	1.1201	1.4366	1.37131	1.50198	1.73805	2.93594	2.73128	1.79128	2.14008	2.26378	1.06516	2.14777	1.91441	2.9321	1.4782	1.82927	1.3986	1.45985	1.08978	1.53524	3.90411	1.28205	0.995575	1.40845	2.28614	1.17271	1.57421	2.09386	3.13676	1.24521	3.83091	2.53432	1.60256	2.87837	5.41176	10.101	13.1313	14.8148	9.375	5.76923	12.2642	11.2245	15.3846	12.844	17.4757	9	16.8421
22.16	0.729572	0.697134	1.36901	1.37414	1.37131	2.21344	1.73805	3.55872	2.81938	2.72586	2.0428	1.67323	1.62907	2.49141	1.46396	2.31481	0.960828	3.04878	0.990676	1.516	1.71251	1.46546	3.69863	1.33333	0.940265	1.72855	2.58112	1.38593	2.62369	2.45487	2.50941	2.01149	2.24571	2.11193	2.67094	2.41411	3.52941	8.08081	10.101	12.037	12.5	12.5	10.3774	20.4082	13.4615	11.9266	10.6796	7	14.7368
22.18	1.07004	0.813323	1.18233	0.874453	1.26582	1.73913	1.48976	2.58007	2.46696	2.80374	4.0856	1.67323	1.31579	1.80412	1.68919	2.62346	2.06948	2.87456	0.990676	1.7406	1.34925	2.16329	3.76712	0.923077	1.10619	1.08835	2.65487	1.17271	1.94903	2.31047	3.01129	2.01149	3.03831	1.90074	1.92308	1.85701	4.23529	11.1111	14.1414	8.33333	16.6667	9.61538	9.43396	12.2449	8.65385	13.7615	5.82524	13	15.7895
22.2	1.31323	0.619675	1.18233	1.31168	1.74051	2.13439	1.80012	1.60142	2.73128	2.57009	2.33463	2.3622	1.06516	1.71821	2.13964	2.62346	1.40429	2.35192	1.51515	1.23526	1.40114	2.09351	3.0137	1.58974	0.774336	1.72855	2.21239	1.0661	2.24888	2.74368	3.3877	1.91571	3.03831	3.0623	3.09829	1.94986	6.82353	15.1515	13.1313	10.1852	7.29167	13.4615	8.49057	15.3061	16.3462	11.0092	17.4757	15	12.6316
22.22	1.16732	0.735864	1.49347	1.56152	1.26582	1.89723	1.80012	2.66904	2.90749	2.9595	3.01556	1.67323	1.37845	2.31959	3.15315	2.9321	2.21729	2.61324	0.874126	1.23526	1.08978	1.67481	3.9726	1.89744	0.995575	1.92061	1.84366	1.43923	1.42429	2.23827	3.26223	1.341	1.5852	2.32313	3.20513	1.94986	4.70588	13.1313	11.1111	14.8148	15.625	6.73077	18.8679	9.18367	13.4615	7.33945	6.79612	14	12.6316
22.24	1.11868	0.813323	1.24456	0.999375	1.10759	2.45059	1.36561	3.46975	2.46696	2.88162	2.14008	1.87008	1.25313	2.4055	1.57658	4.47531	1.77384	2.96167	1.74825	1.90904	1.40114	1.53524	3.90411	1.64103	1.43805	1.72855	1.32743	1.59915	2.3988	1.94946	2.38394	1.341	4.09511	1.68955	2.67094	1.29991	3.29412	14.1414	10.101	11.1111	14.5833	22.1154	7.54717	11.2245	13.4615	9.17431	13.5922	12	10.5263
22.26	1.41051	0.968242	1.24456	1.93629	1.10759	1.73913	1.80012	1.9573	2.90749	2.41433	2.23735	2.06693	2.06767	2.57732	0.900901	1.23457	1.55211	1.56794	1.45688	1.34756	1.19357	1.60502	3.63014	1.38462	1.27212	1.53649	3.09735	1.97228	1.34933	2.67148	1.88206	1.341	2.37781	1.90074	2.02991	1.85701	5.88235	13.1313	6.06061	17.5926	10.4167	18.2692	8.49057	9.18367	11.5385	15.5963	13.5922	8	12.6316
22.28	1.21595	0.813323	1.05787	1.24922	1.00211	2.21344	2.48293	2.40214	2.64317	2.80374	2.72374	2.26378	1.81704	2.31959	1.57658	3.54938	1.84775	2.1777	1.34033	1.57215	1.29735	2.23308	2.80822	1.23077	0.884956	1.66453	1.76991	1.86567	2.54873	2.31047	3.76412	1.53257	3.17041	1.68955	2.77778	1.85701	4.70588	12.1212	15.1515	9.25926	8.33333	13.4615	6.60377	7.14286	13.4615	7.33945	5.82524	19	10.5263
22.3	0.583658	0.697134	1.86683	1.37414	1.16034	1.66008	1.17939	2.40214	2.81938	2.88162	2.33463	2.26378	1.81704	1.97595	2.02703	2.9321	1.4782	1.48084	1.34033	1.34756	0.778412	2.02373	3.49315	0.923077	1.10619	2.36876	2.0649	1.22601	2.47376	2.74368	2.50941	1.53257	1.84941	2.11193	1.81624	1.76416	5.41176	12.1212	12.1212	17.5926	15.625	5.76923	10.3774	12.2449	11.5385	10.0917	2.91262	12	14.7368
22.32	0.729572	0.619675	1.05787	1.06184	1.05485	1.50198	1.8622	2.13523	2.81938	2.33645	2.52918	2.46063	1.94236	2.49141	2.13964	2.62346	0.960828	1.82927	1.1655	1.12296	0.934094	1.39567	2.94521	1.48718	1.1615	1.85659	1.76991	1.33262	1.64918	2.31047	2.50941	2.29885	2.64201	2.32313	2.24359	1.02136	5.41176	6.06061	16.1616	10.1852	16.6667	10.5769	6.60377	9.18367	6.73077	13.7615	12.6214	9	7.36842
22.34	1.36187	1.16189	0.995644	1.56152	1.37131	1.58103	2.35878	2.66904	3.17181	3.34891	3.01556	2.06693	1.56642	2.49141	2.02703	3.39506	0.960828	2.70035	1.45688	1.01067	1.24546	2.02373	3.08219	0.974359	1.05088	1.66453	1.99115	1.27932	1.12444	2.67148	1.88206	1.43678	2.64201	2.32313	1.92308	2.22841	5.17647	10.101	3.0303	9.25926	17.7083	9.61538	12.2642	12.2449	13.4615	6.42202	5.82524	12	11.5789
22.36	1.11868	0.929512	0.933416	1.1243	1.10759	0.869565	2.11049	2.75801	2.55507	2.41433	2.0428	2.06693	1.4411	2.14777	2.02703	1.38889	1.40429	2.78746	1.22378	1.96519	1.03788	1.53524	2.80822	1.07692	1.1615	1.79257	1.76991	1.43923	1.7991	3.10469	2.50941	1.24521	2.50991	1.47835	1.7094	1.39276	4.94118	14.1414	15.1515	8.33333	12.5	14.4231	11.3208	20.4082	10.5769	11.0092	10.6796	11	12.6316
22.38	1.11868	0.774593	1.49347	1.74891	1.47679	1.26482	1.67598	2.4911	3.43612	3.27103	1.94553	1.67323	1.75439	1.89003	1.57658	2.31481	1.99557	2.09059	1.10723	1.40371	1.14167	1.67481	2.73973	1.4359	1.10619	1.66453	2.0649	1.43923	2.3988	1.44404	3.26223	1.72414	3.30251	1.47835	1.81624	2.04271	4.94118	13.1313	22.2222	8.33333	11.4583	9.61538	7.54717	9.18367	12.5	12.844	5.82524	11	14.7368
22.4	0.729572	0.619675	0.995644	1.1243	1.26582	1.26482	1.98634	2.66904	2.81938	2.25857	1.94553	1.87008	1.69173	2.49141	2.59009	2.46914	1.55211	2.26481	0.641026	1.45985	0.830306	1.32589	3.49315	1.28205	1.21681	1.53649	1.76991	1.49254	1.04948	2.16606	3.01129	1.72414	2.50991	2.11193	2.24359	1.76416	3.76471	7.07071	10.101	11.1111	7.29167	9.61538	8.49057	12.2449	15.3846	8.25688	14.5631	9	10.5263
22.42	0.972763	0.503486	1.1201	1.49906	1.26582	1.66008	1.80012	3.11388	2.11454	2.33645	1.55642	2.16535	1.37845	1.80412	2.13964	2.9321	1.62602	1.91638	1.57343	1.12296	1.19357	1.81438	3.15068	1.69231	1.27212	1.66453	1.69617	1.38593	1.7991	1.80505	2.133	1.72414	1.5852	2.00634	2.02991	2.04271	3.52941	13.1313	14.1414	11.1111	11.4583	5.76923	9.43396	10.2041	12.5	11.0092	7.76699	11	8.42105
22.44	1.16732	0.426026	1.36901	1.31168	1.10759	2.21344	1.80012	2.66904	2.11454	2.25857	2.14008	1.77165	1.25313	1.89003	3.26577	3.24074	1.92166	2.09059	0.757576	1.12296	1.24546	1.46546	2.73973	1.23077	0.884956	1.66453	1.62242	1.43923	1.87406	1.29964	2.63488	1.72414	2.77411	2.95671	2.35043	1.48561	3.52941	8.08081	15.1515	7.40741	10.4167	17.3077	8.49057	11.2245	8.65385	11.9266	15.534	15	15.7895
22.46	1.55642	0.619675	0.871189	1.24922	0.580169	2.05534	1.30354	1.9573	1.93833	1.79128	1.94553	1.27953	1.12782	1.97595	1.12613	2.77778	1.55211	1.91638	1.45688	1.12296	0.985989	1.67481	3.0137	1.17949	1.10619	1.92061	2.65487	1.38593	1.87406	2.45487	1.88206	1.62835	3.43461	2.00634	1.81624	1.94986	4	7.07071	14.1414	11.1111	9.375	16.3462	7.54717	8.16327	15.3846	8.25688	14.5631	6	13.6842
22.48	1.0214	0.735864	1.24456	1.31168	0.896624	1.66008	1.6139	2.4911	2.46696	2.57009	1.75097	1.87008	1.75439	2.49141	1.57658	3.24074	1.92166	1.74216	1.10723	1.17911	1.08978	1.18632	3.49315	1.33333	0.608407	1.21639	1.9174	1.49254	1.72414	1.80505	2.63488	1.341	1.5852	1.58395	2.24359	1.39276	4.70588	9.09091	10.101	4.62963	8.33333	6.73077	9.43396	7.14286	14.4231	4.58716	7.76699	13	11.5789
22.5	1.0214	0.542215	0.933416	1.74891	1.16034	1.73913	1.73805	2.66904	1.93833	1.94704	2.91829	1.9685	1.06516	2.31959	2.92793	2.16049	1.25647	1.82927	1.1655	1.17911	0.8822	2.09351	2.67123	1.07692	0.719027	0.768246	1.62242	1.54584	1.34933	2.38267	3.13676	2.01149	3.43461	2.21753	1.60256	1.94986	4.70588	7.07071	16.1616	5.55556	9.375	10.5769	7.54717	11.2245	7.69231	11.0092	4.85437	7	8.42105
22.52	1.07004	0.426026	0.808961	1.68645	0.843882	1.18577	1.6139	3.29181	3.34802	2.72586	1.6537	2.55906	2.06767	2.4055	2.59009	2.62346	1.55211	1.74216	1.45688	1.01067	1.19357	1.88416	3.76712	1.38462	0.995575	2.04866	1.32743	1.27932	2.02399	1.73285	1.50565	2.10728	2.11361	2.11193	1.60256	1.39276	2.58824	7.07071	17.1717	12.037	12.5	10.5769	8.49057	9.18367	9.61538	9.17431	12.6214	16	8.42105
22.54	0.826848	1.0457	1.24456	1.93629	1.16034	1.58103	1.6139	1.9573	2.64317	3.11526	1.45914	2.16535	1.81704	1.89003	1.91441	3.54938	2.14339	1.74216	1.22378	1.45985	0.934094	1.95394	3.28767	1.07692	1.1615	1.60051	2.0649	1.17271	2.3988	2.45487	2.50941	1.53257	3.17041	1.79514	2.35043	2.32126	3.05882	10.101	7.07071	11.1111	9.375	6.73077	9.43396	9.18367	13.4615	9.17431	5.82524	9	9.47368
22.56	0.826848	0.464756	1.1201	1.49906	0.949367	2.45059	1.48976	2.40214	2.29075	2.33645	3.11284	1.77165	0.877193	1.54639	2.47748	2.9321	1.55211	2.1777	1.22378	1.34756	0.778412	1.60502	3.35616	1.02564	1.21681	2.36876	1.69617	1.01279	1.64918	2.02166	2.38394	1.62835	1.84941	1.90074	2.02991	1.76416	3.05882	9.09091	15.1515	12.037	9.375	13.4615	6.60377	15.3061	9.61538	12.844	4.85437	6	6.31579
22.58	1.0214	0.813323	1.36901	1.18676	1.05485	1.58103	1.8622	2.58007	2.37885	1.63551	1.84825	1.1811	1.06516	1.89003	1.91441	3.24074	1.62602	1.65505	1.22378	0.95452	0.778412	1.18632	2.80822	1.02564	0.774336	1.28041	2.43363	1.01279	2.24888	1.87726	3.13676	1.81992	1.71731	1.90074	2.13675	1.48561	4	9.09091	13.1313	7.40741	13.5417	12.5	11.3208	14.2857	4.80769	9.17431	2.91262	11	14.7368
22.6	1.21595	0.813323	1.18233	1.06184	1.16034	1.66008	1.73805	2.75801	2.90749	2.57009	2.52918	2.3622	1.69173	1.80412	2.25225	2.16049	2.06948	2.87456	1.45688	1.45985	1.45304	1.74459	3.21918	1.07692	0.995575	1.28041	1.62242	1.43923	2.17391	1.94946	2.00753	0.862069	2.24571	1.58395	1.38889	3.06407	4.23529	12.1212	11.1111	6.48148	19.7917	5.76923	13.2075	9.18367	7.69231	6.42202	5.82524	12	12.6316
22.62	1.36187	0.735864	1.68015	1.24922	1.16034	1.50198	1.98634	2.58007	2.46696	2.41433	2.82101	2.46063	1.50376	1.80412	2.36486	2.16049	2.2912	2.52613	1.1655	1.17911	0.934094	0.976971	2.46575	0.923077	1.10619	1.40845	1.9174	1.1194	2.32384	2.52708	3.13676	2.10728	2.24571	2.21753	2.02991	1.85701	3.29412	10.101	7.07071	17.5926	11.4583	9.61538	8.49057	8.16327	12.5	7.33945	9.70874	9	6.31579
22.64	0.77821	0.580945	0.684505	1.31168	1.10759	1.89723	1.80012	2.93594	2.81938	2.1028	2.72374	1.9685	2.3183	2.06186	1.91441	3.08642	2.06948	1.91638	1.10723	1.06682	0.830306	1.11654	3.76712	1.28205	0.995575	1.28041	1.69617	2.07889	1.94903	1.94946	2.76035	1.05364	1.71731	2.42872	2.88462	1.48561	2.82353	9.09091	10.101	6.48148	12.5	5.76923	11.3208	10.2041	14.4231	12.844	3.8835	10	11.5789
22.66	1.11868	0.580945	2.17797	1.4366	1.00211	1.89723	1.73805	1.86833	3.0837	2.88162	2.0428	1.27953	1.62907	1.80412	2.25225	1.08025	2.06948	1.74216	1.10723	1.23526	1.24546	1.46546	2.60274	1.69231	0.663717	0.896287	2.35988	1.1194	2.3988	2.31047	1.88206	1.341	3.17041	2.42872	1.7094	2.32126	4.23529	13.1313	11.1111	8.33333	10.4167	8.65385	10.3774	16.3265	8.65385	10.0917	7.76699	5	8.42105
22.68	1.11868	0.658404	1.30678	1.06184	0.685654	1.50198	1.80012	1.77936	3.34802	2.80374	2.0428	2.06693	1.81704	2.57732	2.13964	2.46914	2.2912	2.78746	1.34033	1.17911	1.19357	1.88416	2.67123	1.23077	0.995575	1.40845	1.03245	1.0661	2.02399	2.16606	2.76035	1.91571	2.37781	1.79514	1.92308	1.57846	3.52941	14.1414	17.1717	12.963	13.5417	9.61538	9.43396	12.2449	13.4615	8.25688	10.6796	16	7.36842
22.7	1.41051	0.735864	1.30678	1.18676	1.47679	2.13439	1.67598	3.02491	2.99559	2.18069	2.82101	2.16535	1.4411	1.97595	1.68919	2.16049	1.62602	2.78746	1.1655	0.898372	1.45304	2.16329	2.32877	1.89744	1.27212	1.60051	2.28614	0.906183	1.94903	1.80505	3.63864	2.29885	2.77411	2.32313	1.7094	1.29991	4.23529	14.1414	16.1616	13.8889	10.4167	9.61538	11.3208	13.2653	11.5385	11.0092	10.6796	9	10.5263
22.72	1.41051	0.697134	0.871189	1.18676	1.16034	1.89723	1.24146	2.58007	2.29075	2.49221	2.82101	1.1811	0.93985	1.80412	2.13964	3.7037	1.40429	2.43902	1.34033	1.12296	0.8822	1.74459	3.08219	1.48718	0.719027	1.08835	1.76991	1.1194	1.87406	1.58845	2.50941	2.49042	2.77411	1.58395	1.60256	2.32126	3.76471	15.1515	15.1515	12.037	9.375	13.4615	14.1509	6.12245	9.61538	8.25688	10.6796	7	6.31579
22.74	1.55642	0.968242	1.24456	1.68645	1.21308	1.89723	2.04842	2.13523	2.81938	2.33645	3.30739	1.87008	1.75439	2.06186	3.15315	2.9321	1.92166	2.70035	1.10723	1.01067	0.934094	1.39567	2.53425	1.07692	0.829646	1.85659	1.62242	1.38593	2.09895	2.45487	2.88582	1.72414	3.69881	0.95037	2.24359	2.22841	2.35294	12.1212	12.1212	14.8148	11.4583	13.4615	7.54717	15.3061	12.5	13.7615	12.6214	7	4.21053
22.76	0.875486	0.852053	1.49347	1.4366	0.632911	1.10672	1.67598	3.46975	2.55507	2.80374	2.52918	1.37795	2.06767	2.49141	3.15315	3.24074	1.62602	2.09059	1.98135	1.17911	1.50493	1.88416	2.87671	1.23077	1.05088	1.21639	1.84366	1.54584	2.17391	2.02166	2.38394	1.62835	2.90621	2.53432	1.38889	1.94986	3.76471	15.1515	14.1414	5.55556	7.29167	8.65385	11.3208	8.16327	6.73077	8.25688	17.4757	16	10.5263
22.78	1.45914	0.813323	1.43124	1.31168	1.21308	1.73913	2.23464	3.38078	3.34802	2.25857	2.23735	1.9685	1.94236	1.80412	2.25225	2.00617	1.4782	2.43902	2.0979	1.17911	1.19357	1.32589	3.69863	0.923077	1.21681	0.960307	1.99115	1.54584	1.72414	2.59928	2.88582	1.81992	1.84941	1.68955	1.7094	2.04271	4.23529	16.1616	10.101	12.037	9.375	10.5769	12.2642	7.14286	9.61538	11.9266	6.79612	13	8.42105
22.8	1.16732	0.929512	1.05787	1.62399	1.00211	1.81818	2.11049	3.11388	2.02643	2.72586	3.01556	2.26378	1.75439	2.92096	2.81532	3.7037	2.21729	2.26481	1.10723	1.12296	1.19357	2.09351	4.17808	1.4359	0.719027	1.21639	1.84366	1.01279	2.24888	1.51625	2.133	1.62835	3.43461	2.42872	1.7094	2.32126	3.29412	9.09091	10.101	8.33333	8.33333	6.73077	8.49057	6.12245	14.4231	7.33945	6.79612	13	11.5789
22.82	1.41051	1.16189	0.995644	1.1243	1.00211	2.13439	1.73805	2.31317	2.64317	2.02492	2.14008	2.16535	2.3183	2.92096	2.92793	2.00617	1.62602	3.223	1.28205	1.79674	0.985989	1.60502	3.83562	1.64103	1.10619	1.72855	1.84366	1.1194	1.34933	1.80505	3.3877	2.77778	2.37781	2.32313	1.92308	1.94986	4.23529	14.1414	10.101	17.5926	15.625	10.5769	19.8113	11.2245	7.69231	10.0917	7.76699	9	8.42105
22.84	1.16732	0.968242	1.8046	1.06184	0.843882	2.05534	1.80012	2.13523	2.46696	3.19315	3.30739	1.67323	1.4411	1.46048	1.91441	2.77778	1.33038	2.09059	1.51515	1.06682	1.24546	0.976971	4.0411	1.28205	0.940265	1.60051	2.0649	1.65245	1.64918	2.67148	1.63112	2.49042	3.03831	2.74551	2.77778	2.22841	4.94118	12.1212	10.101	13.8889	10.4167	9.61538	6.60377	13.2653	6.73077	12.844	11.6505	11	14.7368
22.86	0.972763	0.619675	1.1201	1.56152	1.37131	1.50198	1.80012	2.4911	2.46696	1.94704	2.0428	2.85433	2.38095	1.80412	2.02703	2.31481	1.77384	2.00348	1.10723	1.57215	1.14167	1.60502	3.21918	0.769231	0.829646	1.34443	2.35988	1.27932	1.87406	2.38267	3.26223	2.29885	1.98151	2.85111	2.35043	1.76416	4.23529	5.05051	12.1212	14.8148	7.29167	10.5769	12.2642	12.2449	13.4615	12.844	5.82524	8	12.6316
22.88	1.31323	0.697134	1.36901	1.56152	1.10759	1.89723	1.73805	2.66904	3.61233	3.42679	3.59922	1.87008	1.62907	2.31959	2.25225	2.46914	1.40429	2.00348	1.22378	1.06682	1.14167	2.30286	3.49315	1.38462	0.608407	1.98464	1.76991	1.1194	2.47376	1.87726	2.76035	1.43678	1.84941	1.90074	2.88462	1.67131	4.70588	12.1212	11.1111	5.55556	7.29167	10.5769	10.3774	6.12245	11.5385	8.25688	1.94175	12	4.21053
22.9	1.07004	0.968242	0.871189	1.56152	1.10759	1.73913	1.36561	2.66904	2.81938	2.9595	3.6965	1.1811	1.56642	1.80412	2.7027	1.85185	1.77384	2.26481	0.757576	2.07748	1.14167	1.67481	3.0137	1.17949	1.54867	1.28041	1.62242	1.38593	2.02399	2.52708	4.01506	2.77778	3.03831	2.53432	2.45726	2.59981	4.94118	12.1212	11.1111	5.55556	10.4167	12.5	11.3208	9.18367	6.73077	9.17431	12.6214	9	11.5789
22.92	1.0214	0.735864	1.05787	2.06121	1.21308	1.42292	1.55183	3.38078	3.96476	2.33645	2.14008	1.5748	1.75439	2.49141	1.91441	2.46914	2.58684	2.43902	1.80653	0.95452	1.55682	1.60502	3.49315	1.64103	0.995575	1.28041	1.99115	1.70576	2.24888	2.16606	2.50941	1.91571	2.50991	2.63992	1.92308	2.41411	3.76471	13.1313	12.1212	13.8889	7.29167	12.5	7.54717	10.2041	12.5	8.25688	9.70874	13	12.6316
22.94	1.21595	1.20062	1.30678	1.56152	1.31857	2.52964	1.48976	2.66904	3.70044	2.64798	1.45914	2.26378	1.8797	2.74914	3.71622	3.39506	1.62602	1.91638	1.57343	1.12296	1.29735	1.32589	3.42466	1.28205	1.10619	1.60051	2.28614	1.49254	2.02399	2.74368	3.01129	1.91571	2.64201	2.63992	2.02991	1.67131	4	16.1616	10.101	6.48148	10.4167	11.5385	6.60377	7.14286	6.73077	7.33945	0.970874	11	9.47368
22.96	1.6537	0.658404	1.18233	1.81137	1.16034	2.84585	1.73805	3.46975	2.73128	1.94704	2.52918	2.65748	1.75439	2.4055	1.68919	2.77778	1.77384	2.61324	1.10723	1.57215	1.24546	1.95394	2.39726	1.17949	1.38274	1.28041	1.84366	1.97228	2.32384	2.23827	3.88959	2.01149	2.37781	1.79514	2.13675	1.94986	6.35294	10.101	9.09091	10.1852	10.4167	5.76923	8.49057	10.2041	11.5385	11.0092	9.70874	8	4.21053
22.98	1.36187	0.774593	1.1201	1.62399	1.00211	1.81818	1.98634	4.00356	3.17181	2.25857	2.52918	1.67323	2.00501	2.23368	1.91441	2.46914	2.14339	2.1777	1.3986	1.17911	1.29735	2.16329	3.0137	1.74359	1.21681	1.47247	1.9174	1.43923	1.72414	1.73285	2.88582	1.341	3.03831	2.21753	2.5641	1.29991	3.52941	5.05051	8.08081	6.48148	14.5833	3.84615	5.66038	12.2449	9.61538	6.42202	5.82524	6	11.5789
23	1.36187	0.542215	1.43124	1.37414	0.896624	1.42292	1.80012	3.02491	2.90749	2.41433	3.21012	2.26378	1.62907	2.23368	1.8018	2.46914	1.4782	2.00348	1.6317	1.516	1.24546	2.16329	2.39726	1.38462	0.884956	1.66453	1.84366	1.22601	2.47376	1.87726	3.3877	1.14943	2.64201	2.21753	2.77778	2.41411	3.52941	15.1515	6.06061	6.48148	12.5	15.3846	6.60377	6.12245	8.65385	9.17431	6.79612	7	15.7895
23.02	1.31323	1.0457	0.622278	1.37414	1.05485	1.73913	2.42086	3.38078	2.64317	4.04984	3.30739	2.16535	0.814536	2.83505	1.91441	2.00617	1.33038	1.56794	1.22378	1.40371	1.24546	1.88416	2.60274	1.28205	1.49336	1.47247	1.9174	1.0661	2.24888	2.59928	2.88582	1.43678	3.30251	3.0623	2.35043	1.94986	5.17647	7.07071	10.101	12.963	13.5417	13.4615	8.49057	7.14286	11.5385	7.33945	7.76699	4	5.26316
23.04	0.924125	0.813323	1.18233	1.31168	1.42405	1.34387	2.04842	4.89324	2.81938	2.80374	2.62646	2.16535	1.69173	1.71821	2.47748	2.62346	1.69993	1.74216	1.74825	1.6283	1.55682	1.39567	3.21918	1.48718	0.884956	1.40845	1.99115	1.38593	2.77361	2.31047	2.50941	1.14943	2.77411	3.2735	2.13675	1.11421	3.76471	15.1515	11.1111	11.1111	14.5833	18.2692	8.49057	10.2041	11.5385	5.50459	9.70874	11	11.5789
23.06	1.16732	0.968242	1.36901	0.874453	0.738397	2.52964	2.545	3.64769	2.99559	2.64798	2.14008	1.47638	1.37845	1.80412	1.57658	2.31481	1.10865	1.74216	1.10723	1.516	1.34925	2.30286	3.28767	1.17949	1.1615	1.79257	1.62242	1.54584	2.24888	1.58845	2.25847	2.01149	3.30251	2.95671	2.99145	1.57846	4.23529	14.1414	5.05051	4.62963	12.5	7.69231	6.60377	9.18367	6.73077	7.33945	5.82524	17	9.47368
23.08	1.36187	0.619675	1.43124	1.87383	1.10759	1.26482	2.23464	2.84698	2.11454	2.64798	2.23735	1.47638	1.4411	1.80412	2.02703	1.69753	1.84775	2.52613	1.10723	1.90904	1.34925	1.67481	2.73973	1.12821	1.32743	1.53649	1.76991	1.33262	1.57421	1.66065	1.88206	0.957854	3.56671	1.26716	2.5641	1.57846	4.70588	11.1111	11.1111	9.25926	8.33333	11.5385	11.3208	15.3061	5.76923	11.9266	6.79612	8	8.42105
23.1	1.36187	0.619675	1.74238	0.749532	1.16034	1.26482	2.11049	3.55872	2.99559	3.03738	2.91829	1.87008	1.31579	1.46048	1.91441	2.46914	2.06948	2.00348	1.6317	1.23526	2.23145	0.976971	2.26027	1.12821	1.38274	1.79257	2.0649	1.75906	1.87406	2.59928	3.01129	1.24521	2.90621	1.90074	2.02991	2.13556	3.05882	11.1111	10.101	4.62963	9.375	8.65385	6.60377	6.12245	8.65385	5.50459	5.82524	3	11.5789
23.12	0.972763	1.20062	1.61792	1.49906	1.00211	1.89723	1.42768	3.29181	1.85022	2.49221	2.33463	1.77165	1.81704	1.46048	1.8018	2.9321	1.69993	2.1777	1.8648	1.17911	2.07577	1.88416	3.15068	1.33333	1.27212	1.79257	2.21239	1.38593	1.7991	1.51625	2.50941	1.81992	1.84941	1.58395	2.35043	2.32126	3.76471	13.1313	10.101	13.8889	7.29167	11.5385	12.2642	9.18367	2.88462	8.25688	6.79612	8	6.31579
23.14	1.0214	0.464756	1.18233	1.24922	1.52954	1.73913	1.48976	2.2242	2.02643	2.25857	1.94553	2.16535	1.94236	1.80412	2.36486	2.9321	1.84775	2.35192	1.28205	1.23526	1.40114	1.74459	2.80822	1.48718	0.884956	1.34443	1.17994	1.43923	1.34933	2.23827	3.01129	2.01149	2.50991	2.00634	2.13675	1.67131	3.05882	13.1313	9.09091	11.1111	14.5833	12.5	6.60377	12.2449	12.5	3.66972	13.5922	7	7.36842
23.16	0.875486	0.968242	1.30678	1.06184	1.21308	1.89723	2.11049	2.04626	2.37885	2.18069	2.72374	1.9685	1.25313	2.31959	3.04054	3.24074	1.77384	2.96167	1.45688	0.95452	1.03788	1.39567	3.21918	1.33333	1.1615	1.02433	1.99115	1.0661	1.57421	2.45487	2.133	1.62835	1.98151	2.00634	1.38889	1.48561	4	14.1414	10.101	12.037	7.29167	9.61538	13.2075	18.3673	15.3846	14.6789	8.73786	13	11.5789
23.18	1.21595	0.697134	1.55569	1.56152	0.949367	1.73913	1.6139	3.20285	2.81938	2.41433	2.43191	1.77165	1.75439	2.66323	2.7027	2.31481	1.40429	2.35192	1.74825	1.45985	1.34925	2.16329	3.0137	1.74359	0.829646	1.15237	1.69617	0.906183	2.17391	1.73285	2.76035	0.862069	2.11361	0.95037	2.88462	1.39276	3.52941	6.06061	8.08081	9.25926	14.5833	15.3846	3.77358	14.2857	13.4615	11.0092	14.5631	6	14.7368
23.2	1.07004	0.580945	1.55569	1.56152	1.74051	2.05534	1.73805	1.51246	3.43612	2.57009	1.94553	0.984252	1.75439	1.6323	2.25225	2.46914	1.40429	2.35192	1.3986	1.57215	1.14167	2.30286	2.39726	1.07692	1.05088	1.34443	1.62242	1.33262	1.87406	1.29964	2.50941	2.01149	2.77411	1.68955	2.45726	2.41411	4.23529	7.07071	7.07071	7.40741	11.4583	8.65385	8.49057	7.14286	7.69231	11.9266	7.76699	13	11.5789
23.22	1.21595	0.348567	1.8046	1.4366	0.474684	1.89723	2.04842	1.60142	2.02643	1.79128	1.94553	1.67323	1.50376	1.80412	2.59009	3.54938	1.99557	2.70035	1.51515	1.516	1.50493	1.88416	3.35616	1.12821	0.774336	1.66453	1.9174	1.70576	1.57421	2.59928	2.133	1.14943	2.64201	1.37276	2.88462	2.13556	4.23529	7.07071	8.08081	12.037	16.6667	6.73077	4.71698	12.2449	9.61538	5.50459	4.85437	10	8.42105
23.24	1.11868	0.929512	1.05787	1.1243	1.21308	1.89723	1.55183	3.46975	2.11454	1.86916	3.50195	1.9685	1.00251	2.23368	2.13964	2.77778	2.66075	2.52613	1.3986	1.06682	0.726518	1.95394	3.28767	1.38462	0.774336	0.960307	2.0649	1.1194	2.24888	2.67148	2.63488	1.91571	2.50991	1.79514	1.38889	1.57846	3.29412	9.09091	9.09091	6.48148	15.625	9.61538	3.77358	12.2449	11.5385	7.33945	6.79612	15	7.36842
23.26	0.875486	0.852053	1.55569	1.74891	0.791139	1.89723	2.17256	2.31317	3.0837	2.80374	2.23735	1.1811	1.06516	1.80412	2.02703	2.62346	2.21729	2.35192	1.04895	1.516	1.19357	2.30286	2.87671	1.4359	0.719027	0.896287	1.62242	1.49254	2.17391	1.15523	3.76412	1.43678	2.50991	2.42872	1.81624	1.94986	3.52941	15.1515	8.08081	17.5926	8.33333	12.5	13.2075	8.16327	12.5	6.42202	2.91262	9	14.7368
23.28	1.07004	0.619675	1.05787	1.37414	0.949367	1.18577	1.55183	2.31317	2.81938	2.33645	2.14008	1.5748	1.62907	2.23368	2.02703	3.7037	2.06948	1.74216	1.22378	1.516	1.19357	1.46546	3.21918	0.871795	0.608407	0.832266	1.69617	0.959488	1.7991	2.09386	2.25847	1.43678	2.64201	1.47835	2.67094	1.67131	3.52941	14.1414	8.08081	5.55556	9.375	13.4615	7.54717	16.3265	10.5769	9.17431	9.70874	13	6.31579
23.3	1.41051	0.658404	1.61792	1.62399	1.16034	1.73913	1.55183	2.58007	2.81938	2.64798	1.26459	1.1811	1.69173	1.54639	1.12613	2.46914	1.69993	2.35192	1.51515	1.23526	0.985989	2.02373	3.08219	1.07692	1.10619	1.40845	1.9174	1.81237	2.17391	1.87726	1.50565	1.91571	3.17041	1.68955	2.24359	2.69266	4.70588	11.1111	5.05051	6.48148	12.5	10.5769	6.60377	10.2041	6.73077	8.25688	7.76699	13	6.31579
[truncated: 2,329 more rows]
[truncated: 30 more columns]

## Sheet: mineral abundance fit results
Above Dam
	Mineral Percentages
Depth (cm)	Quartz	Anorthoclase	Albite	Kaolinite	Illite	Goethite	Sum
1	66.4	0.7	3.3	6.6	12.2	10.8	100
2	71.4	1	2.1	9.8	10.4	5.2	99.9
[truncated: 84 more rows]

## Sheet: sequential extractions
ABOVE DAM CORE								BELOW DAM CORE								POOL 1 CORE								POOL 2 CORE
[truncated: 138 more rows]

[truncated: 1 more sheets: water chemistry]
